# Supplementary material for: Harnessing sulfilimine as an oxidizing directing group in Cp*Co(iii)-catalyzed [4+2] annulation with alkynes and 1,3-diynes
Source: Royal Society of Chemistry journal article supplement (doi:10.1039/d5cc01230a), 2025-01-01

# ***Harnessing Sulfilimine as an Oxidizing Directing Group in Cp\*Co(III)-Catalyzed [4 + 2] Annulation with Alkynes and 1,3-Diynes***

Arijit Ghosh and Amit B. Pawar\*

*School of Chemical Sciences, Indian Institute of Technology Mandi,*

*Himachal Pradesh, 175005, India*

Corresponding Author e-mail:

[amitpawar@iitmandi.ac.in](mailto:amitpawar@iitmandi.ac.in)

| <b>Table of Content</b> |                                                                                                         | <b>S-1</b> |
|-------------------------|---------------------------------------------------------------------------------------------------------|------------|
| 1.                      | General methods                                                                                         | S-2        |
| 2.                      | Experimental procedure for the optimization study                                                       | S-2        |
| 3.                      | General procedure for the Co-catalyzed C–H annulation of sulfilimines with alkynes and 1,3-diynes       | S-3        |
| 4.                      | Large-scale reaction                                                                                    | S-4        |
| 5.                      | Post-synthetic modifications of isoquinolone <b>3aa</b>                                                 | S-4        |
| 6.                      | Intermolecular competitive experiment of sulfilimines                                                   | S-8        |
| 7.                      | Kinetic Isotope Effect Study: Parallel Reactions                                                        | S-9        |
| 8.                      | Kinetic Isotope Effect Study: Competitive reaction                                                      | S-10       |
| 9.                      | X-ray structures                                                                                        | S-11       |
| 10.                     | Spectroscopic data of isoquinolones obtained in this study                                              | S-15       |
| 11.                     | References                                                                                              | S-27       |
|                         | Appendix: Spectral Copies of <sup>1</sup> H and <sup>13</sup> C NMR of Compounds Obtained in this Study | S-28       |

## ***1. General methods***

Unless otherwise stated, all commercial reagents and solvents were used without additional purification. Analytical thin layer chromatography (TLC) was performed on precoated silica gel 60 F254 plates. Visualization via TLC was achieved by the use of UV light (254 nm). Column chromatography was undertaken on silica gel (100–200 mesh) using a proper eluent system. NMR spectra were recorded in CDCl<sub>3</sub> or DMSO-D<sub>6</sub> at 500 MHz for <sup>1</sup>H NMR spectra, 125 MHz for <sup>13</sup>C NMR spectra and 470 MHz for <sup>19</sup>F NMR spectra.. Chemical shifts are quoted in parts per million referenced to the appropriate solvent peak or 0.0 ppm for tetramethylsilane. The following abbreviations were used to describe peak splitting patterns when appropriate: br = broad, s = singlet, d = doublet, t = triplet, q = quartet, dd = doublet of doublet, m = multiplet. Coupling constants, *J*, are reported in hertz. For <sup>13</sup>C NMR, chemical shifts are reported in parts per million referenced to the center of a triplet at 77.0 ppm of chloroform-d center of a septate at 39.52 ppm in case of DMSO-D<sub>6</sub>. HRMS spectra were recorded using ESI-TOF techniques. The sulfilimine were prepared according to the procedure described in the literature.<sup>1</sup> diphenylacetylene is purchased from Alfa Aesar and used without any further purification.

## ***2. Experimental procedure for the optimization study***

To a screw-capped vial with a spinvane triangular-shaped Teflon stirbar were added sulfilimine **1a** (27.2 mg, 0.15 mmol, 1.5 equiv.), diphenylacetylene **2a** (17.8 mg, 0.1 mmol, 1.0 equiv.), [Cp\*Co(CO)I<sub>2</sub>] (4.8 mg, 10.0 mol %), Ag(I) salt (20 mol %), additive (20 mol %), and solvent (0.6 mL) under nitrogen atmosphere. The reaction mixture was stirred at a given temperature in an oil bath for the indicated period of time, filtered through a pad of celite and then the celite pad was washed with CH<sub>2</sub>Cl<sub>2</sub> (10 mL × 2). The solvent was removed under reduced pressure and crude yield was measured by <sup>1</sup>H NMR using an internal standard (1,1,2,2-tetrachloroethane). The yields were calculated with respect to diphenylacetylene (limiting agent).

**Table S1. Optimization study<sup>a</sup>**

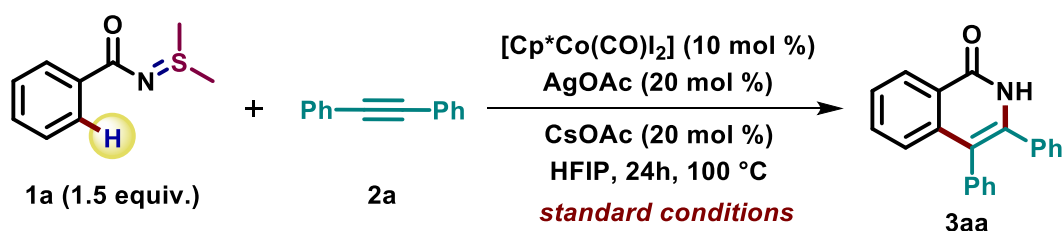

| Entry | Variation from standard conditions                    | Yield (%) <sup>b</sup> |
|-------|-------------------------------------------------------|------------------------|
| 1     | none                                                  | 76 (72) <sup>c</sup>   |
| 2     | Without AgOAc                                         | trace                  |
| 3     | KOAc instead of CsOAc                                 | 72                     |
| 4     | NaOAc instead of CsOAc                                | 68                     |
| 5     | PivOH instead of CsOAc                                | 46                     |
| 6     | AcOH instead of CsOAc                                 | 48                     |
| 7     | 1,2-DCE as a solvent instead of HFIP                  | n.d.                   |
| 8     | TFE as a solvent instead of HFIP                      | 65                     |
| 9     | AgSbF <sub>6</sub> instead of AgOAc                   | 40                     |
| 10    | AgNTf <sub>2</sub> instead of AgOAc                   | 50                     |
| 11    | 12 h instead of 24 h                                  | 60                     |
| 12    | 80 °C instead of 100 °C                               | 58                     |
| 13    | without CsOAc                                         | 65                     |
| 14    | without $[\text{Cp}^*\text{Co}(\text{CO})\text{I}_2]$ | n.d.                   |

<sup>a</sup>Reaction conditions: **1a** (0.15 mmol, 1.5 equiv.), **2a** (0.10 mmol), Ag(I) salt (20 mol %), additive (20 mol %), and solvent (0.6 mL) at indicated temperature and time. <sup>b</sup>Yields are based on crude <sup>1</sup>H NMR (internal standard: 1,1,2,2 tetrachloroethane). <sup>c</sup>Isolated yield n.d. = not detected. HFIP = 1,1,1,3,3,3-Hexafluoro-2-propanol, PivOH = Pivalic acid.

### 3. General procedure for the Co-catalyzed C–H annulation of sulfilimines with alkynes and 1,3diynes

To a 5 mL seal tube with a Teflon stirbar were added sulfilimine **1** (0.45 mmol, 1.5 equiv.), alkyne/1,3-diyne **2** (0.3 mmol, 1.0 equiv.),  $[\text{Cp}^*\text{Co}(\text{CO})\text{I}_2]$  (14.3 mg, 10.0 mol %), AgOAc (10.0 mg, 20 mol %), CsOAc (11.5 mg, 20 mol %), and HFIP (1.8 mL) under inert atmosphere. The reaction mixture was stirred at 100 °C in an oil bath for 24 h, filtered through a pad of celite and then the celite pad was washed with CH<sub>2</sub>Cl<sub>2</sub> (25 mL × 2). The solvent was removed under reduced pressure and the residue was purified by column chromatography on silica gel using EtOAc/*n*-Hexane) as the eluent to furnish the required isoquinolones.

#### 4. Large-scale reaction

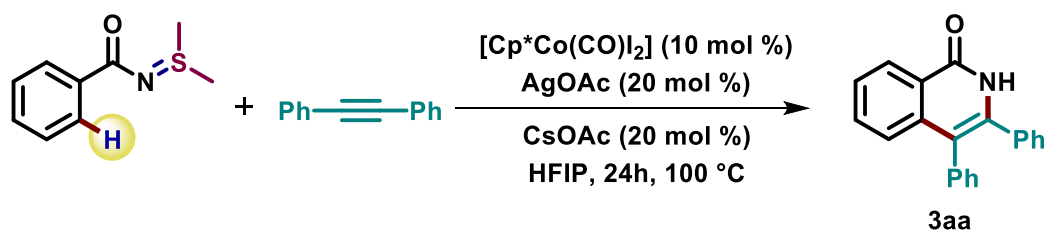

To a 10 mL seal tube with a Teflon stirbar were added added sulfilimine **1** (400 mg, 2.2 mmol, 1.5 equiv.), diphenylacetylene **2a** (262 mg, 1.47 mmol, 1.0 equiv.), [Cp\*Co(CO)I<sub>2</sub>] (70.0 mg, 10.0 mol %), AgOAc (49.0 mg, 20 mol %), CsOAc (56.5 mg, 20 mol %), and HFIP (4.0 mL) under air atmosphere. The reaction mixture was stirred at 100 °C in an oil bath for 24 h, filtered through a pad of celite and then the celite pad was washed with CH<sub>2</sub>Cl<sub>2</sub> (25 mL × 2). The solvents were removed under reduced pressure and the residue was purified by column chromatography on silica gel (25 to 30% EtOAc in *n*-Hexane) as the eluent afforded the product (**3aa**) with 68% yield (297.0 mg).

#### 5. Post-synthetic modifications of isoquinolone 3aa

(a) Synthesis of 12'-phenyl-5'*H*-spiro[cyclohexane-1,7'-isoindolo[2,1-*b*]isoquinolin]-3-ene-2,5,5'-trione (**6**)

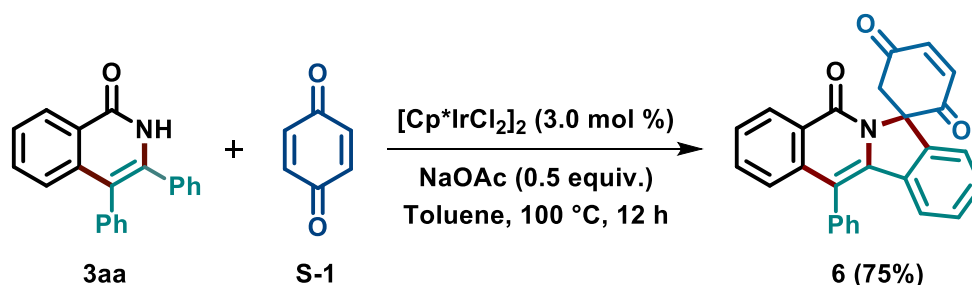

To a 5.0 mL seal tube with a Teflon stirbar were added **3aa** (59.4 mg, 0.20 mmol), benzoquinone **S-1** (47.6 mg, 0.44 mmol, 2.2 equiv), [Cp\*IrCl<sub>2</sub>]<sub>2</sub> (4.8 mg, 0.006 mmol, 3.0 mol %), and NaOAc (8.2 mg, 0.1 mmol, 0.5 equiv.) and toluene (1.0 mL) under air atmosphere. The reaction mixture was stirred at 100 °C for 12 h. After completion of reaction, the reaction mixture was filtered through a pad of celite and then the celite pad was washed with CH<sub>2</sub>Cl<sub>2</sub> (25 mL × 2). The organic layer was removed under reduced pressure and the crude residue was purified by column chromatography on silica gel (15 to 20% of EtOAc in *n*-Hexane) to furnish the product **6** as yellow solid (60.6 mg, 75%).<sup>2</sup> **<sup>1</sup>H NMR (500 MHz, CDCl<sub>3</sub>)** δ 8.46 (dd, *J* =



8.2, 1.0 Hz, 1H), 7.65 – 7.59 (m, 4H), 7.52 (t,  $J = 7.5$  Hz, 1H), 7.47 – 7.41 (m, 2H), 7.29 – 7.25 (m, 1H), 7.23 (d,  $J = 8.2$  Hz, 1H), 7.20 (d,  $J = 7.7$  Hz, 1H), 7.17 (s, 2H), 7.15 – 7.11 (m, 1H), 6.41 (d,  $J = 8.2$  Hz, 1H), 4.91 (d,  $J = 16.0$  Hz, 1H), 2.97 (d,  $J = 16.0$  Hz, 1H);  **$^{13}\text{C}$  NMR (125 MHz,  $\text{CDCl}_3$ )**  $\delta$  195.2, 189.2, 160.3, 142.8, 141.4, 140.0, 138.9, 136.9, 134.5, 133.2, 132.7, 130.9, 130.8, 129.8, 129.7, 129.6, 129.5, 128.7, 127.5, 126.9, 125.6, 125.1, 125.0, 121.0, 115.3, 74.5, 45.9.

**(b) Synthesis of ethyl 2-(5-oxo-12-phenyl-5,7-dihydroisoindolo[2,1-*b*]isoquinolin-7-yl)acetate (7)**

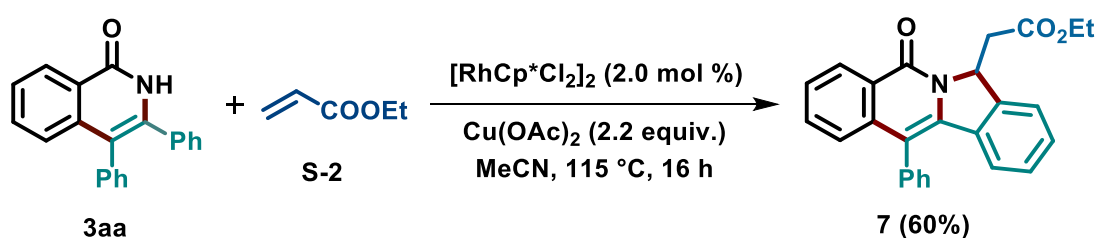

To a 5.0 mL seal tube with a Teflon stirbar were added **3aa** (0.10 mmol, 1.0 equiv.), ethyl acrylate **S-2** (20.2 mg, 2.0 equiv.),  $[\text{RhCp}^*\text{Cl}_2]_2$  (1.2 mg, 2 mol %),  $\text{Cu}(\text{OAc})_2$  (40 mg, 2.2 equiv.), and acetonitrile (0.8 mL). The reaction mixture was stirred at 115 °C in an oil bath for 16 h. After completion of reaction (TLC), the reaction mixture was filtered through a pad of celite and then the celite pad was washed with  $\text{CH}_2\text{Cl}_2$  (15 mL  $\times$  2). The organic layer was removed under reduced pressure and the crude residue was purified by column chromatography on silica gel (30 to 35% of EtOAc in *n*-Hexane) to furnish the product **7** as white solid (24 mg, 60%).<sup>3</sup>  **$^1\text{H}$  NMR (500 MHz,  $\text{CDCl}_3$ )**  $\delta$  8.54 (dd,  $J = 7.7, 1.0$  Hz, 1H), 7.63 – 7.43 (m, 7H), 7.37 – 7.30 (m, 2H), 7.20 (d,  $J = 8.0$  Hz, 1H), 7.09 (t,  $J = 7.7$  Hz, 1H), 6.38 (d,  $J = 7.9$  Hz, 1H), 6.01 (dd,  $J = 7.7, 3.6$  Hz, 1H), 4.11 (q,  $J = 7.1$  Hz, 2H), 3.73 (dd,  $J = 16.1, 3.7$  Hz, 1H), 3.06 (dd,  $J = 16.0, 7.7$  Hz, 1H), 1.15 (t,  $J = 7.1$  Hz, 3H);  **$^{13}\text{C}$  NMR (125 MHz,  $\text{CDCl}_3$ )**  $\delta$  170.4, 160.9, 141.6, 138.7, 137.9, 135.1, 133.5, 132.1, 131.1, 130.9, 129.5, 129.4, 128.43, 128.38, 127.3, 126.3, 125.2, 124.8, 123.9, 122.8, 114.5, 60.6, 56.0, 36.6, 14.0 (one carbon is missing in the aromatic region due to the overlap).

(c) Synthesis of 5,6,13-triphenyl-8*H*-isoquinolino[3,2-*a*]isoquinolin-8-one (**8**)

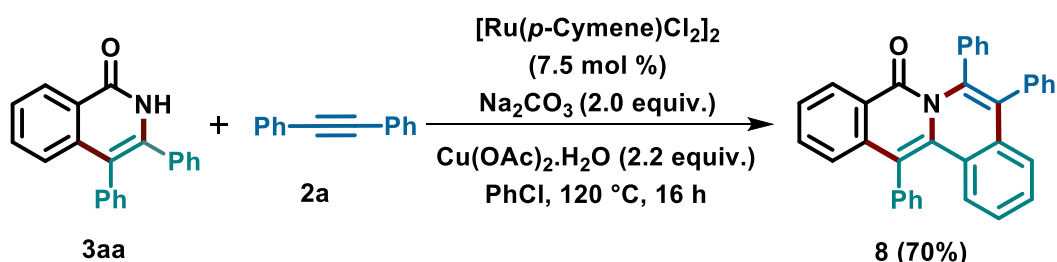

To a 5.0 mL seal tube with a Teflon stirbar were added **3aa** (0.10 mmol, 1.0 equiv.), diphenyl acetylene **2a** (0.20 mmol, 2.0 equiv.),  $[\text{RuCl}_2(p\text{-cymene})]_2$  (4.6 mg, 7.5 mol %),  $\text{Cu}(\text{OAc})_2 \cdot \text{H}_2\text{O}$  (43.8 mg, 0.22 mmol, 2.2 equiv.),  $\text{Na}_2\text{CO}_3$  (21.2 mg, 0.20 mmol, 2.0 equiv.) and  $\text{PhCl}$  (1.0 mL). The reaction mixture was stirred at  $120\text{ }^\circ\text{C}$  in an oil bath for 16 h. After completion of reaction (TLC), the reaction mixture was filtered through a pad of celite and then the celite pad was washed with  $\text{CH}_2\text{Cl}_2$  (15 mL  $\times$  2). The organic layer was removed under reduced pressure and the crude residue was purified by column chromatography on silica gel (30 to 35% of EtOAc in *n*-Hexane) to furnish the product **8** as a yellow solid (33.2 mg, 70%).<sup>4</sup> **<sup>1</sup>H NMR (500 MHz,  $\text{CDCl}_3$ )**  $\delta$  8.25 (d,  $J = 8.0$  Hz, 1H), 7.62 – 7.57 (m, 1H), 7.56 – 7.49 (m, 5H), 7.43 (t,  $J = 7.5$  Hz, 1H), 7.34 (d,  $J = 8.3$  Hz, 1H), 7.28 – 7.20 (m, 3H), 7.17 – 7.10 (m, 5H), 7.09 – 7.04 (m, 5H), 6.89 – 6.84 (m, 1H); **<sup>13</sup>C NMR (125 MHz,  $\text{CDCl}_3$ )**  $\delta$  162.2, 138.5, 137.1, 136.2, 136.1, 133.7, 133.0, 132.3, 132.1, 131.4, 129.7, 129.0, 128.8, 128.4, 128.1, 127.9, 127.6, 127.4, 127.1, 126.9, 126.8, 126.7, 126.4, 126.3, 125.7, 125.6, 125.5, 116.9 (one carbon is missing in the aromatic region due to the overlap).

(d) Synthesis of ethyl 2-(2-benzyl-1-oxo-3,4-diphenyl-1,2-dihydroisoquinolin-8-yl)naphthalene-1,4-dione (**9**)

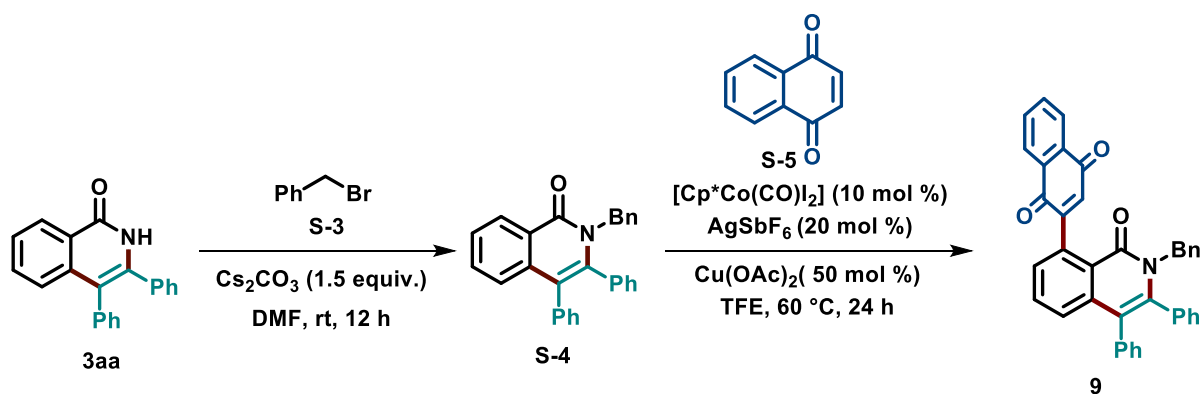

3,4-diphenylisoquinolin-1(2*H*)-one (**3aa**) (0.33 mmol) were taken in a 10 mL round bottom flask and charged with magnetic stirring bars and dissolved in 1.0 mL DMF. After that Cs<sub>2</sub>CO<sub>3</sub> (161.2 mg, 1.5 equiv.) and benzyl bromide **S-3** (86 mg, 1.5 equiv.) were added to it drop wise. The reaction mixture was allowed to stir at room temperature for overnight. After completion of the reaction mixture, water was added to quench the reaction. The aqueous layer was extract with ethyl acetate for three times. The combined organic layer were dried over anhydrous Na<sub>2</sub>SO<sub>4</sub> and removed under reduced pressure. The product were purified by silica gel column chromatography using ethyl acetate-hexane mixture (1:3) as the eluent to furnish the product **S-4** as White solid, (65 mg, 50%).<sup>5</sup> **<sup>1</sup>H NMR (500 MHz, CDCl<sub>3</sub>)** δ 8.61 (dd, *J* = 8.1, 1.1 Hz, 1H), 7.59 – 7.49 (m, 2H), 7.19 – 7.10 (m, 8H), 7.08 – 7.03 (m, 4H), 6.91 – 6.87 (m, 4H), 5.21 (brs, 2H); **HRMS (ESI)** *m/z* calcd. for C<sub>28</sub>H<sub>21</sub>NNaO [M+Na]<sup>+</sup>: 410.1521, found: 410.1521.

To a screw-capped vial with a spinvane triangular-shaped Teflon stirbar were added 2-benzyl-3,4-diphenylisoquinolin-1(2*H*)-one **S-4** (0.10 mmol, 1.0 equiv.), naphthoquinone **S-5** (19.0 mg, 1.2 equiv), [Cp\*Co(CO)I<sub>2</sub>]<sub>2</sub> (4.8 mg, 10 mol %), AgSbF<sub>6</sub> (6.8 mg, 20 mol %), Cu(OAc)<sub>2</sub> (9.1 mg, 50 mol %), and TFE (0.6 mL). The reaction mixture was stirred at 60 °C in an oil bath for 24 h. Then, the reaction mixture was filtered through a pad of celite and then the celite pad was washed with CH<sub>2</sub>Cl<sub>2</sub> (15 mL × 2). The organic layer was removed under reduced pressure and the crude residue was purified by column chromatography on silica gel (10 to 15% of EtOAc in *n*-Hexane) to furnish the product **9** as a brown gummy solid (11 mg, 20%). **<sup>1</sup>H NMR (500 MHz, CDCl<sub>3</sub>)** δ 8.17 – 8.13 (m, 1H), 8.12 – 8.08 (m, 1H), 7.75 – 7.69 (m, 2H), 7.65 – 7.60 (m, 1H), 7.44 – 7.39 (m, 1H), 7.31 (dd, *J* = 8.2, 1.1 Hz, 1H), 7.21 – 7.12 (m, 6H), 7.12 – 7.00 (m, 5H), 6.92 (s, 1H), 6.88 – 6.74 (m, 4H), 5.08 (br s, 2H); **<sup>13</sup>C NMR (125 MHz, CDCl<sub>3</sub>)** δ 185.6, 183.9, 161.9, 155.0, 142.1, 138.4, 137.1, 136.2, 136.0, 133.9, 133.5, 133.4, 133.3, 132.6, 131.9, 131.5, 130.3, 130.2, 128.5, 128.20, 128.12, 128.1, 127.9, 127.6, 127.6, 127.5, 126.94 126.87, 126.8, 126.8, 126.1, 123.9, 119.6, 49.1; **HRMS (ESI)** *m/z* calcd. for C<sub>38</sub>H<sub>25</sub>NaNO<sub>3</sub> [M+Na]<sup>+</sup>: 566.1732, found: 566.1737.

## 6. Intermolecular competitive experiment of sulfilimines

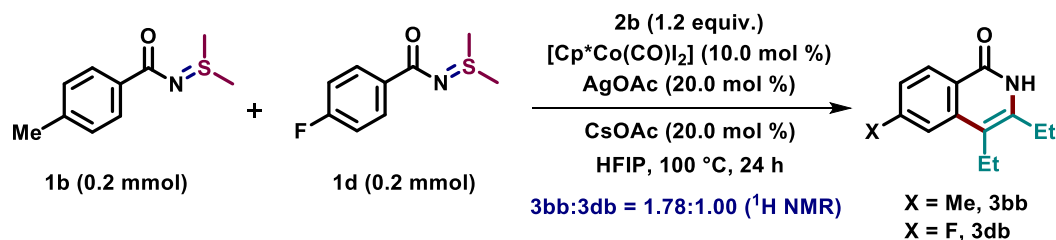

To a dried screw capped vial with a spinvane triangular-shaped Teflon stirbar were added **1b** (39.1 mg, 0.20 mmol), **1d** (39.9 mg, 0.20 mmol), 3-hexyne **2b** (19.7 mg, 1.2 equiv.), followed by  $[\text{Cp}^*\text{Co(CO)I}_2]$  (9.5 mg, 10 mol %), AgOAc (6.7 mg, 20 mol %), CsOAc (7.7 mg, 20 mol %), and HFIP (1.2 mL) under an inert atmosphere. The reaction mixture was stirred at 100 °C in an oil bath for 24 h. Then, the reaction mixture was filtered through a pad of celite and then the celite pad was washed with  $\text{CH}_2\text{Cl}_2$  (10 mL  $\times$  2). The combined organic layers were removed under reduced pressure. The crude residue was purified by column chromatography on silica gel and ratio of the products **3bb** and **3db** was measured by  $^1\text{H}$  NMR analysis which was found to be **1.78:1.00**.

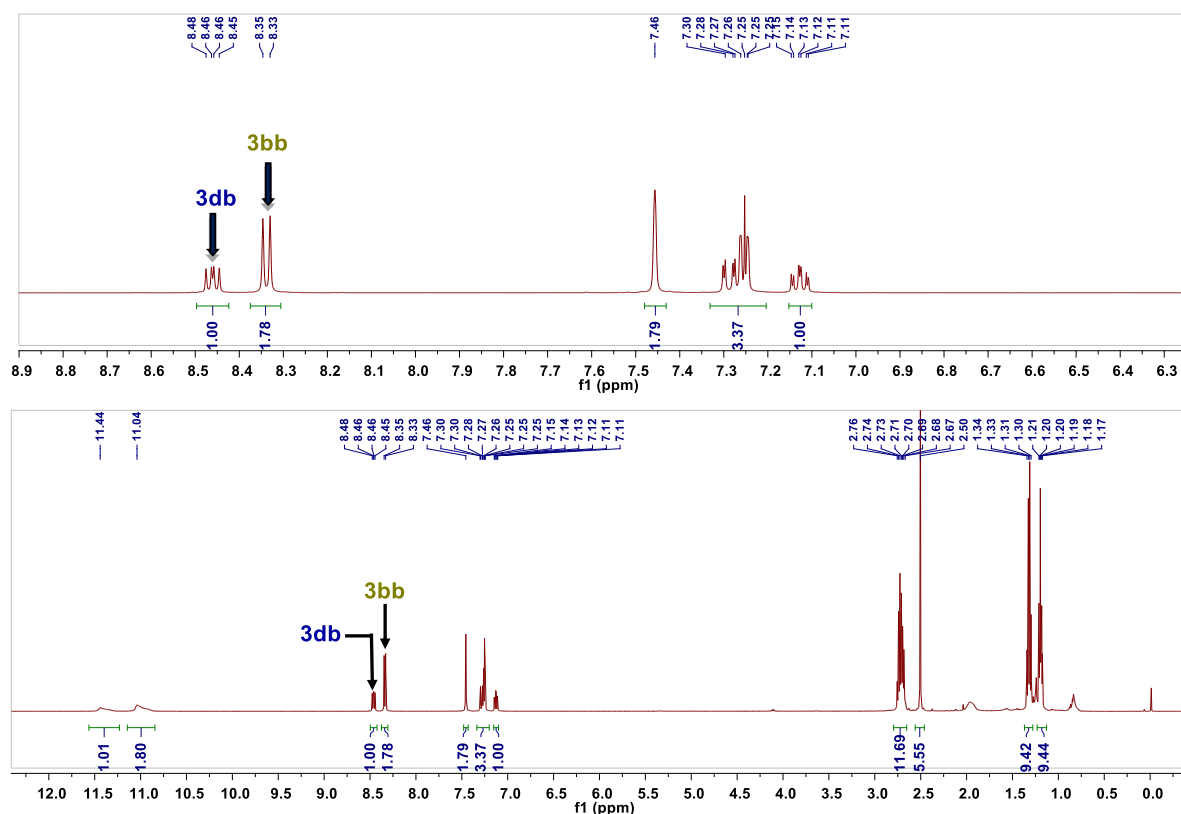

**Figure S1.**  $^1\text{H}$  NMR for intermolecular competitive experiment between **1b** and **1d**.

## 7. Kinetic isotope effect study: Parallel reactions

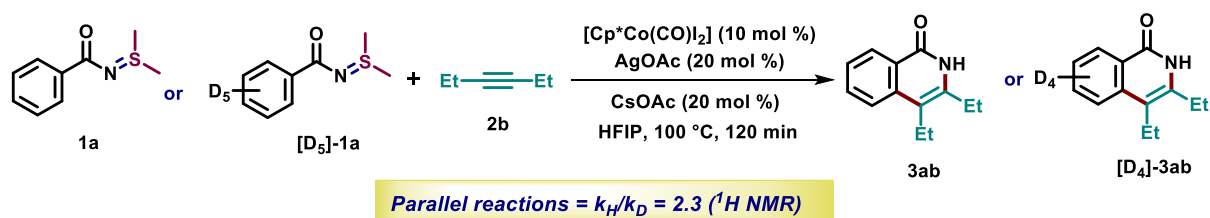

sulfilimine **1a** (18.1 mg, 0.10 mmol) and sulfilimine- $d_5$  [**D**<sub>5</sub>]-**1a** (18.6 mg, 0.10 mmol) were added to two separate screw capped vials with spinvane triangular-shaped Teflon stirbar followed by 3-hexyne **2b** (9.9 mg, 1.2 equiv.), [ $\text{Cp}^*\text{Co}(\text{CO})\text{I}_2$ ] (4.8 mg, 10 mol %), AgOAc (3.3 mg, 20 mol %), CsOAc (3.8 mg, 20 mol %), and HFIP (0.6 mL) under an inert atmosphere. Then, these two reaction mixtures were stirred side-by-side at 100 °C in an oil bath for 120 min. Then, both the reactions were rapidly combined and filtered through a pad of celite and the celite pad was washed with  $\text{CH}_2\text{Cl}_2$  (5 mL  $\times$  2). The solvent was removed under reduced pressure and the crude residue was purified by column chromatography on silica gel (30 to 35% of EtOAc in *n*-Hexane) to furnish the the desired products **3ab** and [**D**<sub>4</sub>]-**3ab**. KIE = 2.3

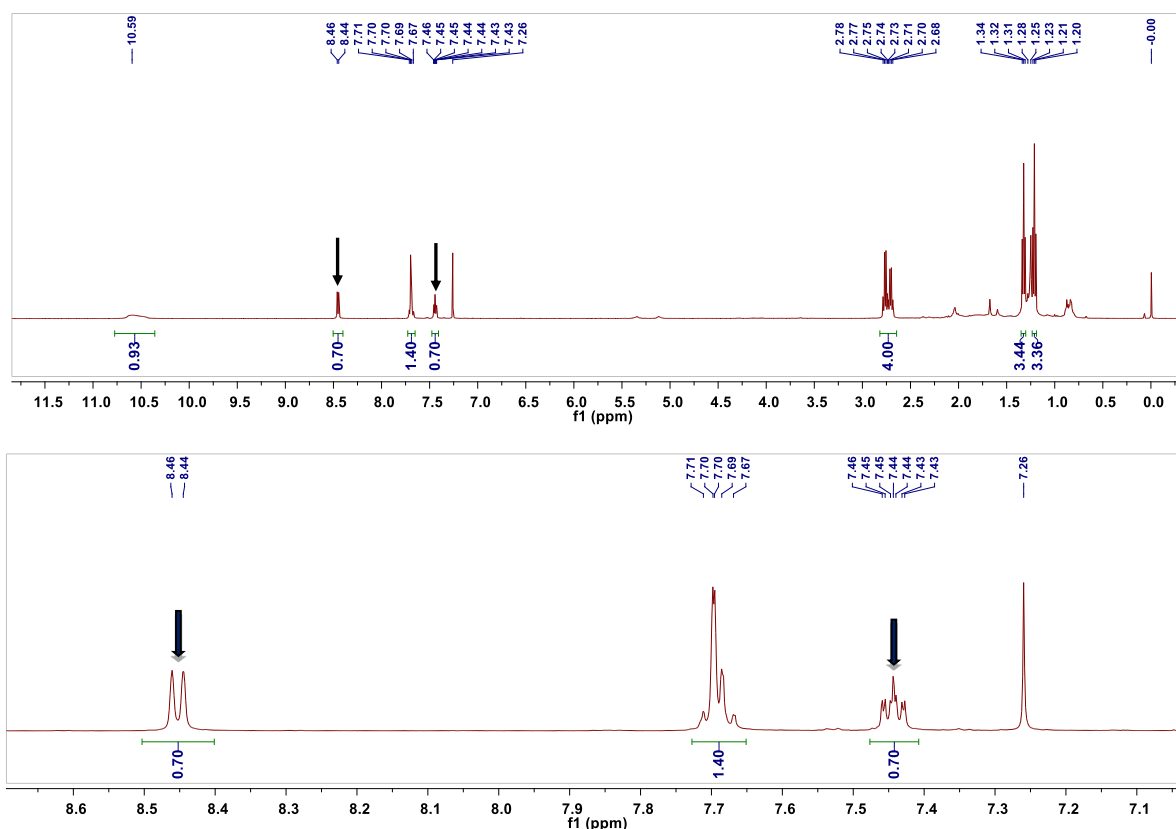

**Figure S2.**  $^1\text{H}$  NMR for KIE Study (Parallel Reactions).

## 8. Kinetic isotope effect study: Competitive reaction

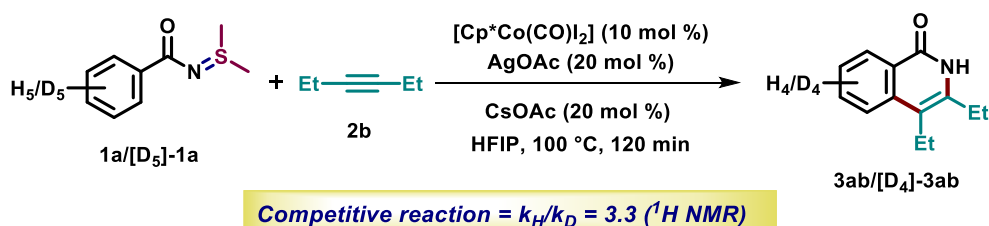

To a dried screw capped vial with a spinvane triangular-shaped Teflon stirbar were added **1a** (18.1 mg, 0.10 mmol), [D<sub>5</sub>]-**1a** (18.6 mg, 0.10 mmol), 3-hexyne **2b** (9.9 mg, 1.2 equiv.), [Cp\*Co(CO)<sub>2</sub>I<sub>2</sub>] (10 mol %, 4.8 mg), AgOAc (3.3 mg, 20 mol %), CsOAc (3.8 mg, 20 mol %), and HFIP (0.6 mL) under an Nitrogen atmosphere. The reaction mixture was stirred at 100 °C in an oil bath for 120 min. Then, the reaction mixture was filtered through a pad of celite and then the celite pad was washed with CH<sub>2</sub>Cl<sub>2</sub> (5 mL × 2). The combined organic layers were removed under reduced pressure. The crude residue was purified by column chromatography

on silica gel (30 to 35% of EtOAc in *n*-Hexane) to furnish the the desired products **3ab** and **[D<sub>4</sub>]-3ab**. KIE = 3.3

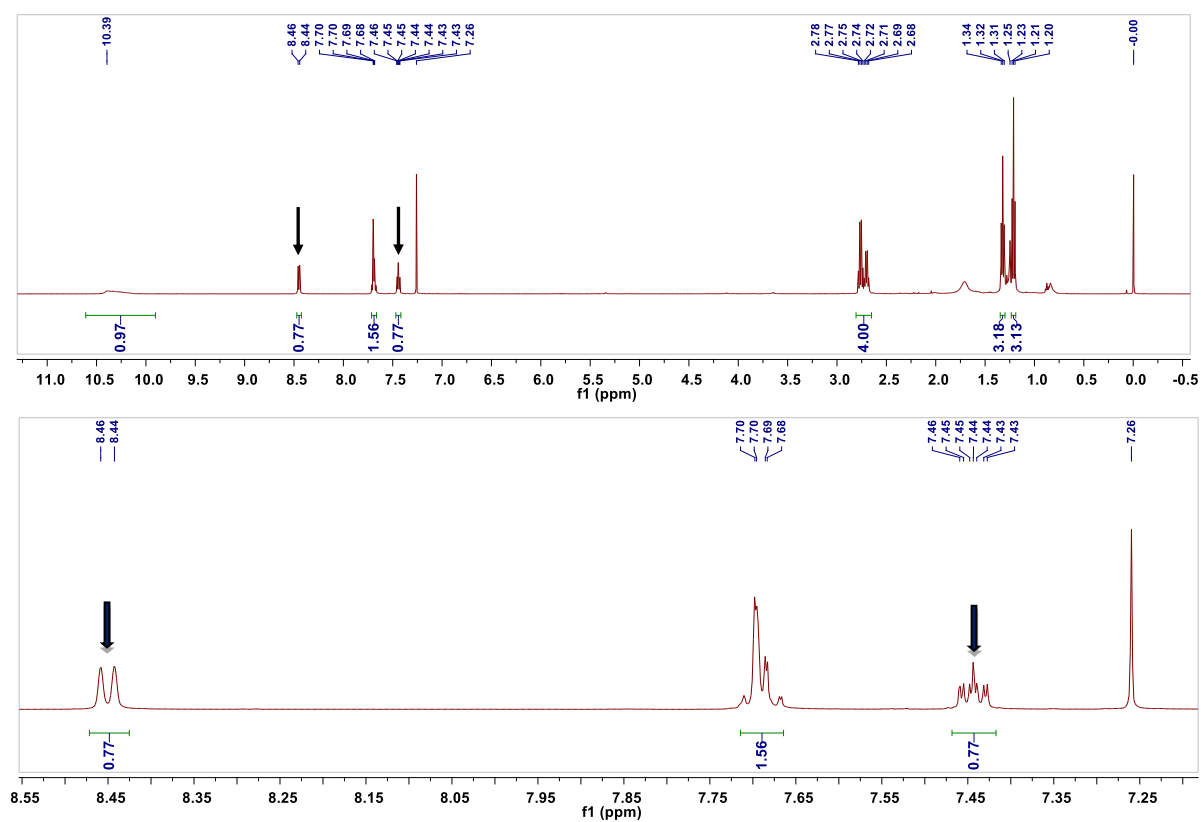

**Figure S3.** <sup>1</sup>H NMR for KIE Study (Competitive Reaction)

## 9. X-ray structures

*For compound 3al*

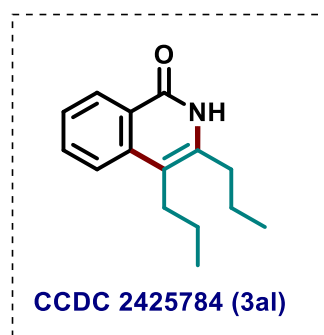

The purified compound **3al** was dissolved in a solvent of CHCl<sub>3</sub>, and placed in a dark cabinet for slowly evaporation. Yellow crystals were collected after few days for X-ray analysis.

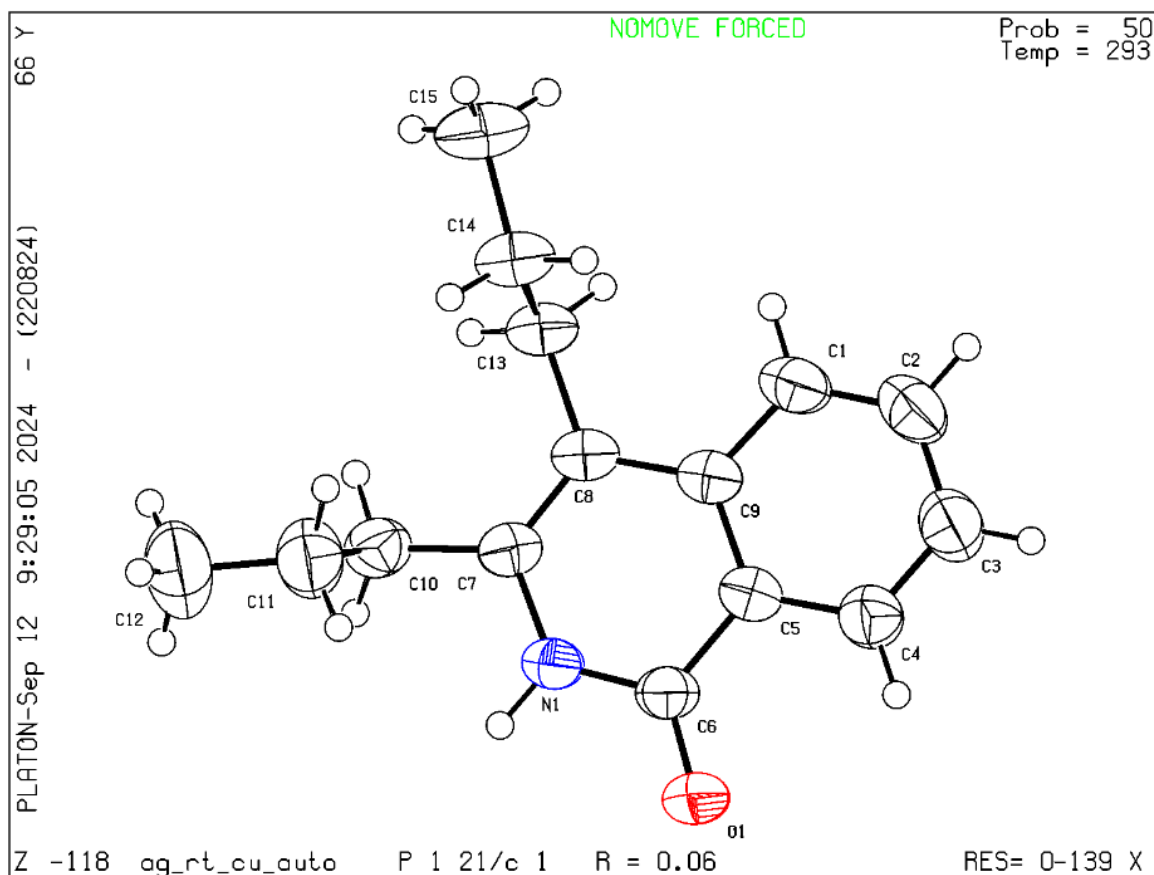

**Figure S4:** ORTEP diagram of compound **3al** with the atom-numbering. Displacement ellipsoids are drawn at the 50% probability level and H atoms are shown as small spheres of arbitrary radius.

**Crystal Data Collection and Refinement Parameters for Compound (3al):**

|                     |                                    |
|---------------------|------------------------------------|
| Identification code | AG_Rt_Cu_auto                      |
| Empirical formula   | C <sub>15</sub> H <sub>19</sub> NO |
| Formula weight      | 229.31                             |
| Temperature/K       | 293(2)                             |
| Crystal system      | Monoclinic                         |
| Space group         | P2 <sub>1</sub> /c                 |
| a/Å                 | 8.7665(7)                          |
| b/Å                 | 18.8687(13)                        |
| c/Å                 | 8.1487(5)                          |
| α/°                 | 90.00                              |



|                                                 |                                                               |
|-------------------------------------------------|---------------------------------------------------------------|
| $\beta/^{\circ}$                                | 102.511(7)                                                    |
| $\gamma/^{\circ}$                               | 90.00                                                         |
| Volume/ $\text{\AA}^3$                          | 1315.89(16)                                                   |
| Z                                               | 4                                                             |
| $\rho_{\text{calc}}/\text{g}/\text{cm}^3$       | 1.157                                                         |
| $\mu/\text{mm}^{-1}$                            | 0.559                                                         |
| F(000)                                          | 496.0                                                         |
| Crystal size/ $\text{mm}^3$                     | $0.642 \times 0.152 \times 0.144$                             |
| Radiation                                       | Cu K $\alpha$ ( $\lambda = 1.54184$ )                         |
| $2\Theta$ range for data collection/ $^{\circ}$ | 9.374 to 138.302                                              |
| Index ranges                                    | $-10 \leq h \leq 10, -15 \leq k \leq 22, -9 \leq l \leq 9$    |
| Reflections collected                           | 3772                                                          |
| Independent reflections                         | 2393 [ $R_{\text{int}} = 0.0205, R_{\text{sigma}} = 0.0306$ ] |
| Data/restraints/parameters                      | 2393/0/160                                                    |
| Goodness-of-fit on $F^2$                        | 0.987                                                         |
| Final R indexes [ $I \geq 2\sigma(I)$ ]         | $R_1 = 0.0568, wR_2 = 0.1546$                                 |
| Final R indexes [all data]                      | $R_1 = 0.0721, wR_2 = 0.1760$                                 |
| Largest diff. peak/hole / $e \text{ \AA}^{-3}$  | 0.19/-0.35                                                    |

***For compound 5ai***

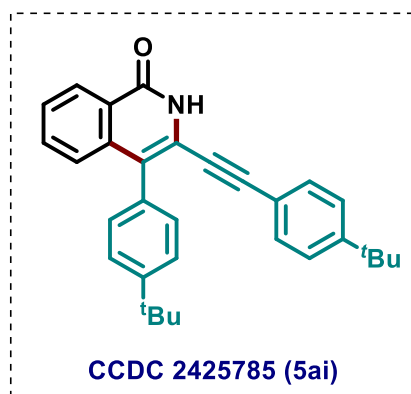

The purified compound **5ai** was dissolved in a solvent of DCM, and placed in a dark cabinet for slowly evaporation. Yellow crystals were collected after few days for X-ray analysis.

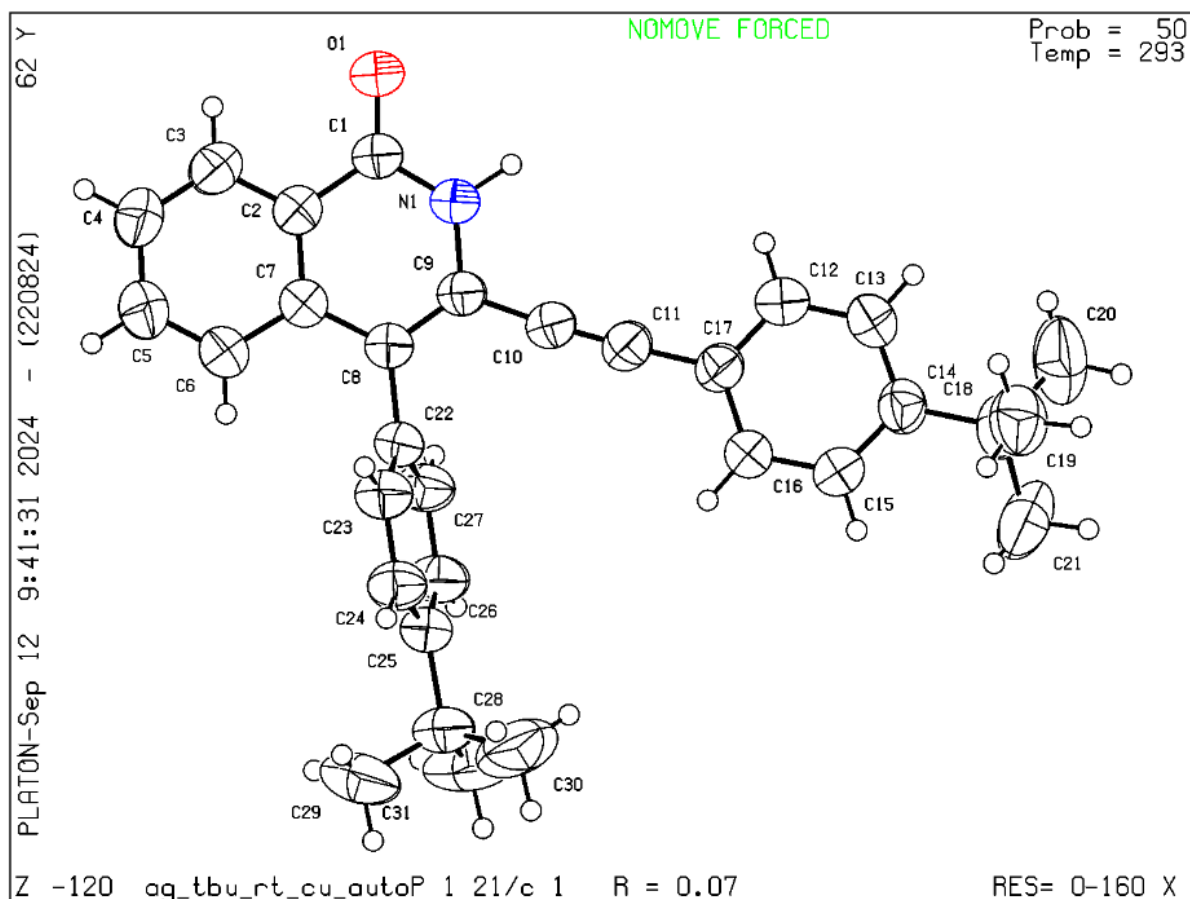

**Figure S5:** ORTEP diagram of compound **5ai** with the atom-numbering. Displacement ellipsoids are drawn at the 50% probability level and H atoms are shown as small spheres of arbitrary radius.

**Crystal Data Collection and Refinement Parameters for Compound (5ai):**

|                     |                                    |
|---------------------|------------------------------------|
| Identification code | Ag_TBU_Rt_CU_auto                  |
| Empirical formula   | C <sub>31</sub> H <sub>31</sub> NO |
| Formula weight      | 433.57                             |
| Temperature/K       | 293(2)                             |
| Crystal system      | monoclinic                         |
| Space group         | P2 <sub>1</sub> /c                 |
| a/Å                 | 10.5297(4)                         |
| b/Å                 | 13.4796(4)                         |
| c/Å                 | 18.0553(5)                         |

|                                                |                                                               |
|------------------------------------------------|---------------------------------------------------------------|
| $\alpha/^\circ$                                | 90                                                            |
| $\beta/^\circ$                                 | 92.422(3)                                                     |
| $\gamma/^\circ$                                | 90                                                            |
| Volume/ $\text{\AA}^3$                         | 2560.41(14)                                                   |
| Z                                              | 4                                                             |
| $\rho_{\text{calc}}/\text{g/cm}^3$             | 1.125                                                         |
| $\mu/\text{mm}^{-1}$                           | 0.513                                                         |
| F(000)                                         | 928.0                                                         |
| Crystal size/ $\text{mm}^3$                    | $0.385 \times 0.303 \times 0.179$                             |
| Radiation                                      | Cu K $\alpha$ ( $\lambda = 1.54184$ )                         |
| 2 $\Theta$ range for data collection/ $^\circ$ | 8.188 to 138.138                                              |
| Index ranges                                   | $-12 \leq h \leq 12, -7 \leq k \leq 16, -21 \leq l \leq 20$   |
| Reflections collected                          | 7700                                                          |
| Independent reflections                        | 4678 [ $R_{\text{int}} = 0.0309, R_{\text{sigma}} = 0.0454$ ] |
| Data/restraints/parameters                     | 4678/0/308                                                    |
| Goodness-of-fit on $F^2$                       | 1.030                                                         |
| Final R indexes [ $I \geq 2\sigma(I)$ ]        | $R_1 = 0.0748, wR_2 = 0.2116$                                 |
| Final R indexes [all data]                     | $R_1 = 0.0953, wR_2 = 0.2507$                                 |
| Largest diff. peak/hole / $e \text{ \AA}^{-3}$ | 0.23/-0.33                                                    |

## 10. Spectroscopic data of isoquinolones obtained in this study

### 3,4-Diphenylisoquinolin-1(2H)-one(3aa).<sup>6</sup>

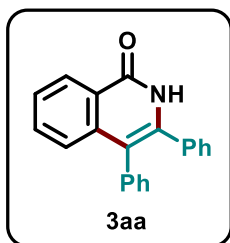

Yellow solid (64.4 mg, 72%); eluent (25-30% ethyl acetate in hexane); **<sup>1</sup>H NMR (500 MHz, DMSO- $D_6$ )**  $\delta$  11.57 (s, 1H), 8.34 – 8.30 (dd,  $J = 8.0, 1.0$  Hz 1H), 7.64 (m, 1H), 7.52 (t,  $J = 7.6$  Hz, 1H), 7.32 – 7.25 (m, 3H), 7.24 – 7.21 (m, 5H), 7.15 (dd,  $J = 8.0, 1.1$  Hz, 3H). **<sup>13</sup>C NMR (125 MHz, DMSO- $D_6$ )**  $\delta$  161.7, 138.6, 138.1, 135.9, 134.6, 132.5, 131.7, 129.9, 128.3, 128.2, 127.7, 127.1, 126.8, 126.3, 125.02, 125.0, 115.5.

### 6-Methyl-3,4-diphenylisoquinolin-1(2H)-one(3ba).<sup>7</sup>

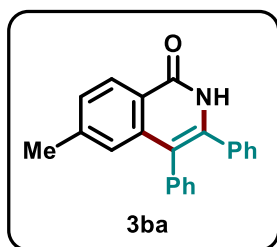

Yellow solid (62.7 mg, 67%); eluent (25-30% ethyl acetate in hexane); **<sup>1</sup>H NMR (500 MHz, DMSO-*D*<sub>6</sub>)** δ 11.47 (brs, 1H), 8.21 (d, *J* = 8.1 Hz, 1H), 7.34 (d, *J* = 8.8 Hz, 1H), 7.32 – 7.24 (m, 3H), 7.23 – 7.18 (m, 5H), 7.15 – 7.12 (m, 2H), 6.92 (s, 1H), 2.30 (s, 3H). **<sup>13</sup>C NMR (125 MHz, DMSO-*D*<sub>6</sub>)** δ 161.5, 142.3, 138.6, 138.2, 135.7, 134.6, 131.7, 129.7, 128.1, 128.0, 127.6, 127.5, 126.9, 126.8, 124.4, 122.9, 115.2, 21.5.

### 6-(*tert*-Butyl)-3,4-diphenylisoquinolin-1(2*H*)-one(3ca).<sup>1</sup>

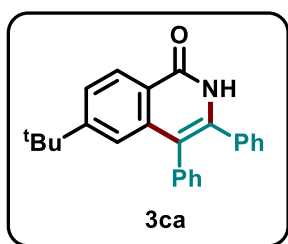

Yellow solid (58.4 mg, 55%); eluent (25-30% ethyl acetate in hexane); **<sup>1</sup>H NMR (500 MHz, CDCl<sub>3</sub>)** δ 8.95 (brs, 1H), 8.42 (d, *J* = 8.4 Hz, 1H), 7.57 (dd, *J* = 8.4, 1.9 Hz, 1H), 7.35 (d, *J* = 1.7 Hz, 1H), 7.33 – 7.27 (m, 3H), 7.25 – 7.21 (m, 5H), 7.20 – 7.17 (m, 2H), 1.25 (s, 9H). **<sup>13</sup>C NMR (125 MHz, CDCl<sub>3</sub>)** δ 162.6, 156.2, 138.6, 137.0, 135.9, 135.4, 131.9, 129.2, 128.5, 128.3, 128.3, 127.3, 127.2, 124.7, 123.0, 121.8, 117.6, 35.3, 31.0.

### 6-Fluoro-3,4-diphenylisoquinolin-1(2*H*)-one(3da).<sup>6</sup>

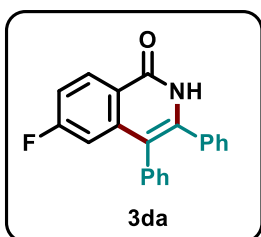

Yellow solid (56.8 mg, 60%); eluent (25-30% ethyl acetate in hexane); **<sup>1</sup>H NMR (500 MHz, CDCl<sub>3</sub>)** δ 10.25 (brs, 1H), 8.42 (dd, *J* = 8.9, 6.0 Hz, 1H), 7.35 – 7.29 (m, 3H), 7.29 – 7.24 (m, 5H), 7.20 – 7.15 (m, 3H), 6.98 (dd, *J* = 10.7, 2.5 Hz, 1H). **<sup>13</sup>C NMR (125 MHz, CDCl<sub>3</sub>)** δ 165.5 (d, *J*<sub>C-F</sub> = 250.5 Hz), 162.4, 141.2 (d, *J*<sub>C-F</sub> = 10 Hz), 138.7, 135.3, 134.5, 131.6, 130.6 (d, *J*<sub>C-F</sub> = 5.4 Hz), 129.4, 128.8, 128.5, 128.2, 127.5, 121.6, 116.7 (d, *J*<sub>C-F</sub> = 2.1 Hz), 115.1 (d, *J*<sub>C-F</sub> = 23.5 Hz), 110.8 (d, *J*<sub>C-F</sub> = 23.3 Hz). **<sup>19</sup>F NMR (470 MHz, CDCl<sub>3</sub>)** δ –105.0.

### 3,4-Diphenyl-6-(trifluoromethyl)isoquinolin-1(2*H*)-one(3ea).<sup>7</sup>

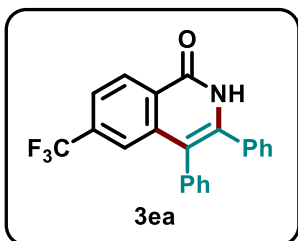

Yellow solid (51.6 mg, 47%); eluent (25-30% ethyl acetate in hexane); **<sup>1</sup>H NMR (500 MHz, DMSO-*D*<sub>6</sub>)** δ 11.92 (brs, 1H), 8.51 (d, *J* = 8.3 Hz, 1H), 7.81 (dd, *J* = 8.4, 1.3 Hz, 1H), 7.39 (s, 1H), 7.35 – 7.28 (m, 3H), 7.27 – 7.22 (m, 5H), 7.18 (dd, *J* = 7.7, 1.4 Hz, 2H); **<sup>13</sup>C NMR (125 MHz, DMSO-*D*<sub>6</sub>)** δ 161.0, 140.6, 138.3, 134.9, 134.1, 132.2 (q, *J*<sub>C-F</sub> = 31.8 Hz), 131.6, 129.8, 128.6, 128.5, 127.7, 127.5, 127.4, 123.7 (q, *J*<sub>C-F</sub> = 272.9 Hz), 121.9 (d, *J*<sub>C-F</sub> = 2.7 Hz), 121.6 (d, *J*<sub>C-F</sub> = 3.2 Hz), 115.1; **<sup>19</sup>F NMR (470 MHz, CDCl<sub>3</sub>)** δ –61.8.

### 3,4-Diethylisoquinolin-1(2*H*)-one (3ab).<sup>1</sup>

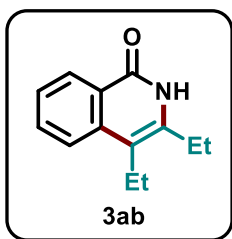

Yellow solid (40.6 mg, 67%); eluent (30-35% ethyl acetate in hexane); **<sup>1</sup>H NMR (500 MHz, CDCl<sub>3</sub>)** δ 11.71 (brs, 1H), 8.49 (d, *J* = 8.0 Hz, 1H), 7.68 (m, 2H), 7.46 – 7.42 (m, 1H), 2.80 – 2.72 (m, 4H), 1.35 (t, *J* = 7.6 Hz, 3H), 1.21 (t, *J* = 7.5 Hz, 3H). **<sup>13</sup>C NMR (125 MHz, CDCl<sub>3</sub>)** δ 164.1, 139.4, 138.2, 132.3, 127.7, 125.2, 125.0, 122.8, 113.8, 24.2, 19.5, 14.9, 14.1.

### 3,4-Diethyl-6-methylisoquinolin-1(2H)-one (3bb).

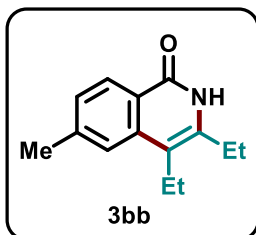

Yellow solid (41 mg, 63%); eluent (30-35% ethyl acetate in hexane); m.p. 178 – 180 °C; **<sup>1</sup>H NMR (500 MHz, CDCl<sub>3</sub>)** δ 11.31 (brs, 1H), 8.36 (d, *J* = 8.2 Hz, 1H), 7.46 (s, 1H), 7.26 (d, *J* = 8.1 Hz, 1H), 2.78 – 2.68 (m, 4H), 2.51 (s, 3H), 1.33 (t, *J* = 7.6 Hz, 3H), 1.21 (t, *J* = 7.5 Hz, 3H); **<sup>13</sup>C NMR (125 MHz, CDCl<sub>3</sub>)** δ 163.9, 142.7, 139.3, 138.3, 127.7, 126.8, 122.8, 122.6, 113.6, 24.2, 22.3, 19.4, 14.9, 14.0; **HRMS (ESI)** *m/z* calcd. for C<sub>14</sub>H<sub>18</sub>NO [M+H]<sup>+</sup>: 216.1388, found: 216.1386.

### 6-(*tert*-Butyl)-3,4-diethylisoquinolin-1(2H)-one (3cb).

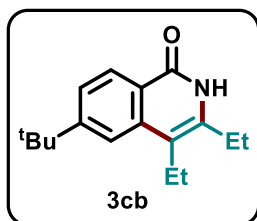

Yellow solid (46.4 mg, 60%); eluent (30-35% ethyl acetate in hexane); m.p. 260 – 262 °C; **<sup>1</sup>H NMR (500 MHz, CDCl<sub>3</sub>)** δ 11.11 (brs, 1H), 8.39 (d, *J* = 8.4 Hz, 1H), 7.67 (d, *J* = 1.6 Hz, 1H), 7.51 (dd, *J* = 8.4, 1.8 Hz, 1H), 2.78 (q, *J* = 7.5 Hz, 2H), 2.72 (q, *J* = 7.6 Hz, 2H), 1.41 (s, 9H), 1.31 (t, *J* = 7.6 Hz, 3H), 1.23 (t, *J* = 7.5 Hz, 3H); **<sup>13</sup>C NMR (125 MHz, CDCl<sub>3</sub>)** δ 163.7, 155.6, 139.0, 138.0, 127.5, 123.4, 122.8, 118.7, 114.0, 35.3, 31.2, 24.3, 19.5, 14.9, 14.1; **HRMS (ESI)** *m/z* calcd. for C<sub>17</sub>H<sub>24</sub>NO [M+H]<sup>+</sup>: 258.1858, found: 258.1854.

### 3,4-Diethyl-6-fluoroisoquinolin-1(2H)-one (3db).

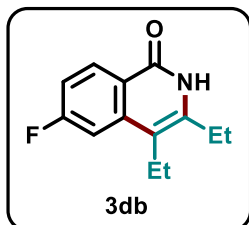

Yellow solid (37.5 mg, 57%); eluent (30-35% ethyl acetate in hexane); m.p. 215 – 220 °C; **<sup>1</sup>H NMR (500 MHz, CDCl<sub>3</sub>)** δ 11.42 (brs, 1H), 8.47 (dd, *J* = 8.9, 6.2 Hz, 1H), 7.30 (dd, *J* = 11.0, 2.5 Hz, 1H), 7.14 (td, *J* = 8.5, 2.3 Hz, 1H), 2.77 – 2.67 (m, 4H), 1.34 (t, *J* = 7.6 Hz, 3H), 1.20 (t, *J* = 7.5 Hz, 3H); **<sup>13</sup>C NMR (125 MHz, CDCl<sub>3</sub>)** δ 166.8 (d, *J*<sub>C-F</sub> = 249.8 Hz), 163.2, 140.9 (d, *J*<sub>C-F</sub> = 9.6 Hz), 140.7, 130.9 (d, *J*<sub>C-F</sub> = 10.3 Hz), 121.9, 113.9 (d, *J*<sub>C-F</sub> = 23.5 Hz), 113.5 (d, *J*<sub>C-F</sub> = 3 Hz), 108.1 (d, *J*<sub>C-F</sub> = 22.5 Hz), 24.4, 19.7, 14.7, 13.8; **HRMS (ESI)** *m/z* calcd. for C<sub>13</sub>H<sub>15</sub>NOF [M+H]<sup>+</sup>: 220.1138, found: 220.1137.

### 3,4-Diethyl-6-(trifluoromethyl)isoquinolin-1(2H)-one (3eb).

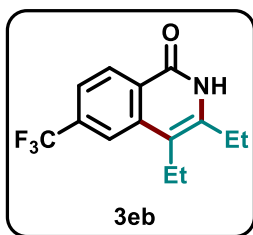

Yellow solid (32.3 mg, 40%); eluent (30-35% ethyl acetate in hexane); m.p. 218 – 220 °C; **<sup>1</sup>H NMR (500 MHz, CDCl<sub>3</sub>)** δ 11.55 (brs, 1H), 8.57 (d, *J* = 8.3 Hz, 1H), 7.95 (s, 1H), 7.64 (dd, *J* = 8.3, 1.0 Hz, 1H), 2.83 – 2.78 (m, 4H), 1.36 (t, *J* = 7.6 Hz, 3H), 1.23 (t, *J* = 7.5 Hz, 3H); **<sup>13</sup>C NMR (125 MHz, DMSO-*d*<sub>6</sub>)** δ 161.0, 142.1, 137.8, 132.3 (q, *J* = 31.3 Hz), 128.7, 127.5, 124.0 (q, *J* = 272.9 Hz), 120.8 (d, *J* = 1.9 Hz), 119.9 (d, *J* = 3.5 Hz), 111.8, 23.3, 18.6, 14.8, 14.0; **<sup>19</sup>F NMR (470 MHz, CDCl<sub>3</sub>)** δ –62.8. **HRMS (ESI)** *m/z* calcd. for C<sub>14</sub>H<sub>14</sub>NNaOF<sub>3</sub> [M+Na]<sup>+</sup>: 292.0925, found: 292.0925.

### 3,4-Diethyl-7-methylisoquinolin-1(2H)-one (3fb).

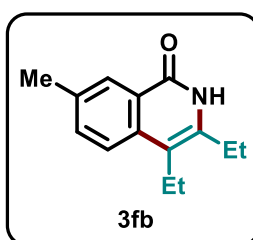

White solid (32 mg, 49%); eluent (30-35% ethyl acetate in hexane); m.p. 163 – 165 °C; **<sup>1</sup>H NMR (500 MHz, CDCl<sub>3</sub>)** δ 11.38 (brs, 1H), 8.27 (s, 1H), 7.60 (d, *J* = 8.3 Hz, 1H), 7.50 (dd, *J* = 8.4, 1.8 Hz, 1H), 2.74 (m, 4H), 2.49 (s, 3H), 1.34 (t, *J* = 7.6 Hz, 3H), 1.20 (t, *J* = 7.5 Hz, 3H); **<sup>13</sup>C NMR (125 MHz, CDCl<sub>3</sub>)** δ 163.9, 138.2, 135.9, 135.1, 133.9, 127.2, 125.0, 122.8, 113.8, 24.1, 21.1, 19.5, 15.0, 14.1; **HRMS (ESI)** *m/z* calcd. for C<sub>14</sub>H<sub>18</sub>NO [M+H]<sup>+</sup>: 216.1388, found: 216.1386.

### 7-Bromo-3,4-diethylisoquinolin-1(2H)-one (3gb).

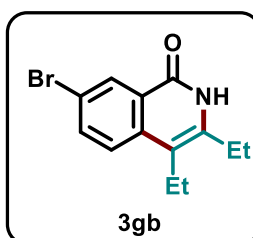

Yellow solid (35.4 mg, 42%); eluent (30-35% ethyl acetate in hexane); m.p. 190 – 192 °C; **<sup>1</sup>H NMR (500 MHz, CDCl<sub>3</sub>)** δ 11.61 (brs, 1H), 8.58 (d, *J* = 2.2 Hz, 1H), 7.75 (dd, *J* = 8.8, 2.2 Hz, 1H), 7.56 (d, *J* = 8.7 Hz, 1H), 2.78 – 2.68 (m, 4H), 1.35 (t, *J* = 7.6 Hz, 3H), 1.19 (t, *J* = 7.5 Hz, 3H); **<sup>13</sup>C NMR (125 MHz, CDCl<sub>3</sub>)** δ 162.9, 140.0, 137.0, 135.4, 130.2, 126.5, 124.8, 119.1, 113.7, 24.2, 19.5, 14.9, 14.0; **HRMS (ESI)** *m/z* calcd. for C<sub>13</sub>H<sub>14</sub>BrNaNO [M+Na]<sup>+</sup>: 302.0156, found: 302.0157.

### 7-Chloro-3,4-diethylisoquinolin-1(2H)-one (3hb).

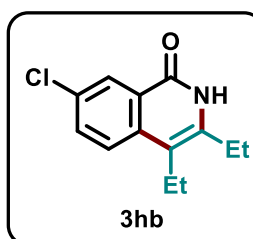

White solid (29.7 mg, 42%); eluent (30-35% ethyl acetate in hexane); m.p. 200 – 202 °C; **<sup>1</sup>H NMR (500 MHz, CDCl<sub>3</sub>)** δ 11.30 (brs, 1H), 8.42 (d, *J* = 2.0 Hz, 1H), 7.66 – 7.59 (m, 2H), 2.78 – 2.68 (m, 4H), 1.34 (t, *J* = 7.6 Hz, 3H), 1.20 (t, *J* = 7.5 Hz, 3H). **<sup>13</sup>C NMR (125 MHz, CDCl<sub>3</sub>)** δ 162.7, 139.4, 136.7, 132.8, 131.5, 127.2, 126.5, 124.7, 113.6, 24.3, 19.6, 14.8, 13.8; **HRMS (ESI)** *m/z* calcd. for C<sub>13</sub>H<sub>15</sub>ClNO [M+H]<sup>+</sup>: 236.0842, found: 236.0845.

### 8-Fluoro-3,4-diphenylisoquinolin-1(2*H*)-one(3ia).<sup>6</sup>

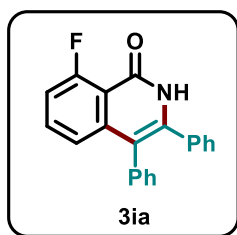

Yellow solid (21 mg, 22%); eluent (25-30% ethyl acetate in hexane); <sup>1</sup>H NMR (500 MHz, DMSO-*D*<sub>6</sub>) δ 11.56 (brs, 1H), 7.63 – 7.57 (m, 1H), 7.32 – 7.19 (m, 9H), 7.16 – 7.11 (m, 2H), 6.90 (d, *J* = 8.2 Hz, 1H). <sup>13</sup>C NMR (125 MHz, DMSO-*D*<sub>6</sub>) δ 162.2 (d, *J*<sub>C-F</sub> = 259.9 Hz), 159.7, 141.5, 140.2, 136.0, 134.4, 134.0 (d, *J*<sub>C-F</sub> = 9.9 Hz), 132.0, 130.0, 128.8, 128.7, 128.1, 127.7, 121.4 (d, *J*<sub>C-F</sub> = 2.6 Hz), 115.4, 114.1 (d, *J*<sub>C-F</sub> = 4 Hz), 113.3 (d, *J*<sub>C-F</sub> = 20.6 Hz). <sup>19</sup>F NMR (470 MHz, DMSO-*D*<sub>6</sub>) δ –111.0.

### 3,4-Diethylbenzo[*g*]isoquinolin-1(2*H*)-one (3jb).

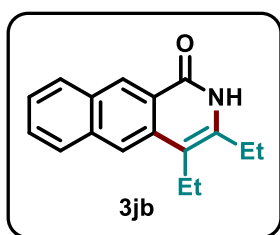

Yellow solid (28.7 mg, 38%); eluent (25-30% ethyl acetate in hexane); m.p. 225 – 227 °C; <sup>1</sup>H NMR (500 MHz, CDCl<sub>3</sub>) δ 10.63 (brs, 1H), 9.09 (s, 1H), 8.12 (s, 1H), 8.06 (d, *J* = 8.3 Hz, 1H), 7.96 (d, *J* = 8.3 Hz, 1H), 7.57 (t, *J* = 7.6 Hz, 1H), 7.49 (t, *J* = 7.5 Hz, 1H), 2.88 (q, *J* = 7.5 Hz, 2H), 2.77 (q, *J* = 7.6 Hz, 2H), 1.40 (t, *J* = 7.6 Hz, 3H), 1.30 (t, *J* = 7.5 Hz, 3H). <sup>13</sup>C NMR (125 MHz, CDCl<sub>3</sub>) δ 164.4, 137.4, 135.5, 134.1, 130.7, 129.2, 128.8, 127.90, 127.87, 125.5, 124.0, 121.1, 113.4, 24.4, 19.8, 14.8, 13.9; HRMS (ESI) *m/z* calcd. for C<sub>17</sub>H<sub>18</sub>NO [M+H]<sup>+</sup>: 252.1388, found: 252.1388.

### 4,5-Diethylthieno[2,3-*c*]pyridin-7(6*H*)-one (3kb).

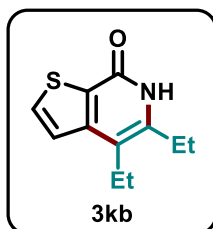

Yellow solid (31.5 mg, 50%); eluent (30-35% ethyl acetate in hexane); m.p. 190 – 192 °C; <sup>1</sup>H NMR (500 MHz, CDCl<sub>3</sub>) δ 11.92 (brs, 1H), 7.71 (d, *J* = 5.1 Hz, 1H), 7.28 (d, *J* = 5.1 Hz, 1H), 2.77 – 2.68 (m, 4H), 1.32 (t, *J* = 7.6 Hz, 3H), 1.19 (t, *J* = 7.6 Hz, 3H); <sup>13</sup>C NMR (125 MHz, CDCl<sub>3</sub>) δ 160.3, 148.1, 141.1, 133.1, 127.3, 122.8, 114.5, 23.5, 21.3, 15.3, 14.5; HRMS (ESI) *m/z* calcd. for C<sub>11</sub>H<sub>13</sub>NaNOS [M+Na]<sup>+</sup>: 230.0616, found: 230.0612.

### 3,4-Di-*p*-tolylisoquinolin-1(2*H*)-one (3ac).<sup>8</sup>

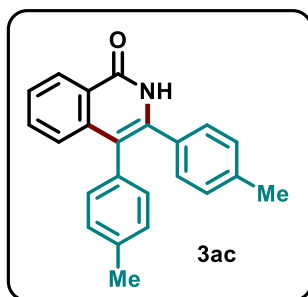

White solid (62.5 mg, 64%); eluent (25-30% ethyl acetate in hexane); <sup>1</sup>H NMR (500 MHz, CDCl<sub>3</sub>) δ 9.10 (brs, 1H), 8.48 (d, *J* = 8.0 Hz, 1H), 7.61 – 7.56 (m, 1H), 7.49 (t, *J* = 7.5 Hz, 1H), 7.36 (d, *J* = 8.2 Hz, 1H), 7.15 – 7.10 (m, 4H), 7.08 – 7.03 (m, 4H), 2.36 (s, 3H), 2.30 (s, 3H); <sup>13</sup>C NMR (125 MHz, CDCl<sub>3</sub>) δ 162.9, 138.9, 138.4, 137.1, 136.8, 132.8, 132.5, 132.1, 131.6, 129.1, 129.1, 128.9,

127.3, 126.3, 125.6, 124.9, 116.9, 21.2; (one carbon is missing in the aliphatic region due to the overlap).

### 3,4-Di-*p*-tolylisoquinolin-1(2*H*)-one (3ad).<sup>9</sup>

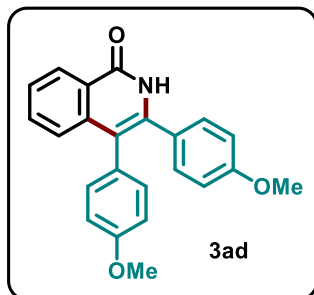

Yellow solid (64.4 mg, 60%); eluent (30-35% ethyl acetate in hexane); m.p. 152 – 154 °C; **<sup>1</sup>H NMR (500 MHz, CDCl<sub>3</sub>)** δ 9.58 (brs, 1H), 8.45 (d, *J* = 7.6 Hz, 1H), 7.59 – 7.55 (m, 1H), 7.47 (t, *J* = 7.4 Hz, 1H), 7.36 (d, *J* = 8.2 Hz, 1H), 7.17 (d, *J* = 8.7 Hz, 2H), 7.09 (d, *J* = 8.6 Hz, 2H), 6.86 (d, *J* = 8.5 Hz, 2H), 6.77 (d, *J* = 8.8 Hz, 2H), 3.82 (s, 3H), 3.78 (s, 3H); **<sup>13</sup>C NMR (125 MHz, CDCl<sub>3</sub>)** δ 162.7, 159.7, 158.8, 139.2, 137.0, 132.9, 132.5, 130.5, 128.2, 127.7, 127.5, 126.3, 125.6, 125.1, 116.4, 114.0, 113.9, 55.2; (one carbon is missing in the aliphatic region due to the overlap).

### Diethyl 4,4'-(1-oxo-1,2-dihydroisoquinoline-3,4-diyl)dibenzoate (3ae).<sup>10</sup>

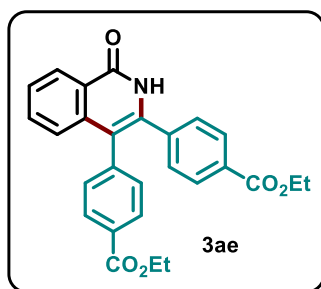

Yellow solid (57.0 mg, 43%); eluent (25-30% ethyl acetate in hexane); **<sup>1</sup>H NMR (500 MHz, CDCl<sub>3</sub>)** δ 10.59 (brs, 1H), 8.42 (dd, *J* = 7.8, 1.3 Hz, 1H), 8.00 (d, *J* = 8.2 Hz, 2H), 7.93 (d, *J* = 8.5 Hz, 2H), 7.63 – 7.57 (m, 1H), 7.53 (t, *J* = 7.5 Hz, 1H), 7.33 (d, *J* = 8.4 Hz, 2H), 7.30 (d, *J* = 8.1 Hz, 1H), 7.26 (d, *J* = 8.2 Hz, 2H), 4.42 – 4.34 (m, 4H), 1.42 – 1.36 (m, 6H); **<sup>13</sup>C NMR (125 MHz, CDCl<sub>3</sub>)**

δ 166.2, 165.9, 163.3, 140.5, 138.6, 137.8, 136.8, 132.8, 131.8, 130.4, 129.68, 129.66, 129.5, 129.4, 127.5, 127.0, 125.2, 125.1, 117.0, 61.2, 61.1, 14.3, 14.2.

### 3,4-Bis(4-fluorophenyl)isoquinolin-1(2*H*)-one (3af).<sup>6</sup>

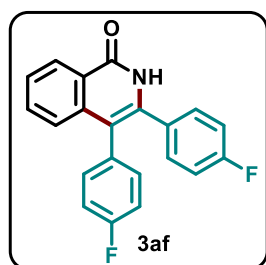

Yellow syrup (54 mg, 54%); eluent (25-30% ethyl acetate in hexane); **<sup>1</sup>H NMR (500 MHz, DMSO-*D*<sub>6</sub>)** δ 11.62 (brs, 1H), 8.31 (d, *J* = 7.7 Hz, 1H), 7.68 – 7.64 (m, 1H), 7.53 (t, *J* = 7.5 Hz, 1H), 7.30 – 7.26 (m, 2H), 7.22 – 7.12 (m, 5H), 7.09 (t, *J* = 8.9 Hz, 2H); **<sup>13</sup>C NMR (125 MHz, DMSO-*D*<sub>6</sub>)** δ 162.7 (d, *J*<sub>C-F</sub> = 244.1 Hz), 161.7, 161.2 (d, *J*<sub>C-F</sub> = 242.5

Hz), 138.0, 133.7 (d, *J*<sub>C-F</sub> = 8.1 Hz), 132.6, 132.1 (d, *J*<sub>C-F</sub> = 8.4 Hz), 132.0 (d, *J*<sub>C-F</sub> = 2.5 Hz), 130.9, 126.6 (d, *J*<sub>C-F</sub> = 59.2 Hz), 125.1, 124.8, 115.2 (d, *J*<sub>C-F</sub> = 21.0 Hz), 114.7 (d, *J*<sub>C-F</sub> = 21.7 Hz), 114.6 (two carbons in the aromatic region are missing due to the overlap); **<sup>19</sup>F NMR (470 MHz, CDCl<sub>3</sub>)** δ -111.5, -114.2.



### 3,4-Bis(3,4-dimethoxyphenyl)isoquinolin-1(2H)-one (3ag).

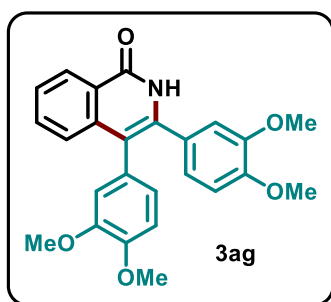

White solid (72.8 mg, 58%); eluent (35-40% ethyl acetate in hexane); m.p. 220 – 225 °C; **<sup>1</sup>H NMR (500 MHz, CDCl<sub>3</sub>)** δ 10.17 (brs, 1H), 8.42 (d, *J* = 7.4 Hz, 1H), 7.61 – 7.55 (m, 1H), 7.49 – 7.45 (m, 1H), 7.42 (d, *J* = 8.1 Hz, 1H), 6.88 (dd, *J* = 8.3, 2.0 Hz, 1H), 6.85 (d, *J* = 8.2 Hz, 1H), 6.80 (d, *J* = 1.9 Hz, 1H), 6.76 (dd, *J* = 8.3, 2.3 Hz, 2H), 6.71 (d, *J* = 1.9 Hz, 1H), 3.89 (s, 3H), 3.86 (s, 3H), 3.72 (s, 3H), 3.67 (s, 3H); **<sup>13</sup>C NMR (125 MHz, CDCl<sub>3</sub>)** δ 163.1, 149.0, 148.8, 148.2, 148.1, 139.0, 137.1, 132.6, 128.6, 127.4, 127.3, 126.3, 125.5, 124.8, 124.1, 121.8, 116.4, 114.8, 112.5, 111.0, 110.5, 55.9, 55.80, 55.76, 55.7.; **HRMS (ESI)** *m/z* calcd. for C<sub>25</sub>H<sub>23</sub>NNaO<sub>5</sub> [M+Na]<sup>+</sup>: 440.1474, found: 440.1479.

### 3,4-Di-*m*-tolylisoquinolin-1(2H)-one (3ah).<sup>10</sup>

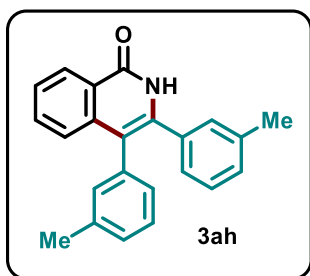

White solid (56.6 mg, 58%); eluent (25-30% ethyl acetate in hexane); **<sup>1</sup>H NMR (500 MHz, CDCl<sub>3</sub>)** δ 9.38 (brs, 1H), 8.47 (dd, *J* = 7.2, 1.0 Hz, 1H), 7.60 – 7.56 (m, 1H), 7.51 – 7.47 (m, 1H), 7.36 (d, *J* = 8.1 Hz, 1H), 7.20 (t, *J* = 7.6 Hz, 1H), 7.13 – 7.05 (m, 4H), 7.02 (s, 1H), 7.00 – 6.96 (m, 2H), 2.30 (s, 3H), 2.26 (s, 3H); **<sup>13</sup>C NMR (125 MHz, CDCl<sub>3</sub>)** δ 162.7, 138.8, 138.0, 137.8, 137.0, 135.6, 134.9, 132.6, 132.4, 129.7, 129.3, 128.8, 128.2, 128.1, 128.0, 127.4, 126.44, 126.43, 125.7, 125.0, 117.2, 21.4, 21.3.

### 3,4-Bis(3-methoxyphenyl)isoquinolin-1(2H)-one (3ai).<sup>11</sup>

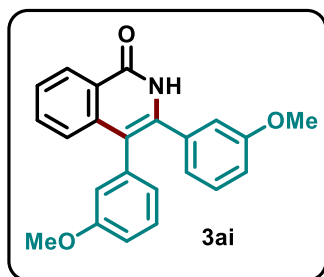

Yellow solid (73 mg, 68%); eluent (30-35% ethyl acetate in hexane); **<sup>1</sup>H NMR (500 MHz, CDCl<sub>3</sub>)** δ 10.02 (brs, 1H), 8.46 (d, *J* = 7.8 Hz, 1H), 7.62 – 7.57 (m, 1H), 7.53 – 7.47 (m, 1H), 7.41 (d, *J* = 8.1 Hz, 1H), 7.25 (t, *J* = 8 Hz, 1H), 7.18 (t, *J* = 7.9 Hz, 1H), 6.89 (d, *J* = 7.5 Hz, 1H), 6.87 – 6.84 (m, 1H), 6.83 – 6.78 (m, 3H), 6.75 – 6.73 (m, 1H), 3.71 (s, 3H), 3.63 (s, 3H). **<sup>13</sup>C NMR (125 MHz, CDCl<sub>3</sub>)** δ 163.2, 159.5, 159.0, 138.5, 137.3, 137.1, 135.9, 132.5, 129.3, 129.2, 127.3, 126.4, 125.6, 124.9, 124.2, 121.6, 117.2, 116.9, 115.2, 114.3, 112.9, 55.1, 55.1.

### 3,4-Bis(3-chlorophenyl)isoquinolin-1(2H)-one (3aj).<sup>7</sup>

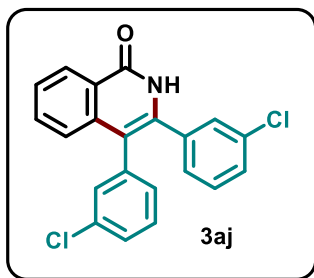

Yellow solid (74.7 mg, 68%); eluent (25-30% ethyl acetate in hexane); **<sup>1</sup>H NMR (500 MHz, DMSO-*D*<sub>6</sub>)** δ 11.70 (brs, 1H), 8.32 (d, *J* = 8.3 Hz, 1H), 7.70 – 7.65 (m, 1H), 7.55 (t, *J* = 7.5 Hz, 1H), 7.39 – 7.32 (m, 4H), 7.30 – 7.25 (m, 2H), 7.22 – 7.16 (m, 2H), 7.13 (d, *J* = 8.1 Hz, 1H). **<sup>13</sup>C NMR (125 MHz, DMSO-*D*<sub>6</sub>)** δ 161.5, 137.7, 137.46, 137.45, 136.1, 132.8, 132.7, 132.3, 131.3, 130.5, 130.0, 129.7, 129.5, 128.6, 128.3, 127.3, 126.8, 126.6, 125.1, 124.7, 114.5.

### 3,4-Di(thiophen-2-yl)isoquinolin-1(2*H*)-one (3ak).<sup>8</sup>

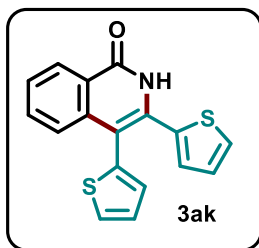

White solid (74.4 mg, 80%); eluent (35-40% ethyl acetate in hexane); **<sup>1</sup>H NMR (500 MHz, DMSO-*D*<sub>6</sub>)** δ 11.57 (brs, 1H), 8.28 (dd, *J* = 7.6, 1.0 Hz, 1H), 7.76 – 7.72 (m, 1H), 7.70 – 7.65 (m, 1H), 7.64 – 7.61 (m, 1H), 7.60 – 7.58 (m, 1H), 7.52 (t, *J* = 7.6 Hz, 1H), 7.23 – 7.18 (m, 2H), 7.12 (d, *J* = 3.4 Hz, 1H), 7.06 – 7.02 (m, 1H); **<sup>13</sup>C NMR (125 MHz, DMSO-*D*<sub>6</sub>)** δ 161.6, 138.6, 135.8, 134.7, 134.1, 132.8, 131.2, 129.9, 129.3, 128.6, 127.7, 126.6, 126.4, 125.0, 124.6, 107.1; (one carbon in the aromatic region is missing due to the overlap).

### 3,4-Dipropylisoquinolin-1(2*H*)-one (3al).<sup>1</sup>

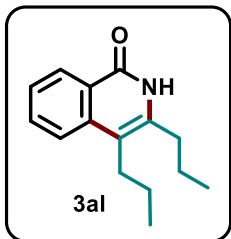

Yellow solid (41.3 mg, 60%); eluent (30-35% ethyl acetate in hexane); **<sup>1</sup>H NMR (500 MHz, CDCl<sub>3</sub>)** δ 11.73 (brs, 1H), 8.48 (d, *J* = 8.2 Hz, 1H), 7.70 – 7.65 (m, 2H), 7.48 – 7.41 (m, 1H), 2.74 – 2.67 (m, 4H), 1.81 – 1.72 (m, 2H), 1.65 – 1.56 (m, 2H), 1.11 – 1.01 (m, 6H); **<sup>13</sup>C NMR (125 MHz, CDCl<sub>3</sub>)** δ 163.9, 138.5, 138.4, 132.2, 127.6, 125.2, 125.0, 123.0, 112.9, 32.8, 28.5, 23.6, 22.8, 14.3, 14.0. **3-Ethyl-4-phenylisoquinolin-1(2*H*)-one (3na)**

### 4-Methyl-3-phenylisoquinolin-1(2*H*)-one (3ma)<sup>12</sup>

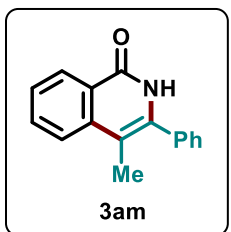

White solid (25.4 mg, 36%); eluent (20-25% ethyl acetate in hexane); **<sup>1</sup>H NMR (500 MHz, CDCl<sub>3</sub>)** δ 9.30 (s, 1H), 8.40 (d, *J* = 8.0 Hz, 1H), 7.74 – 7.67 (m, 2H), 7.55 – 7.35 (m, 6H), 2.23 (s, 3H); **<sup>13</sup>C NMR (125 MHz, CDCl<sub>3</sub>)** δ 162.4, 138.9, 136.5, 135.0, 133.2, 129.3, 129.22, 128.9, 127.6, 126.7, 124.5, 123.8, 110.4, 13.9.

### 3-Methyl-4-phenylisoquinolin-1(2*H*)-one (3ma')<sup>12</sup>

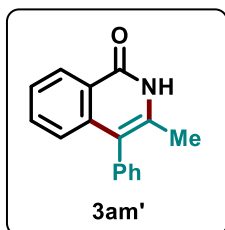

White solid (16.9 mg, 24%); eluent (30-35% ethyl acetate in hexane); **<sup>1</sup>H NMR (500 MHz, CDCl<sub>3</sub>)** δ 10.91 (s, 1H), 8.39 (d, *J* = 8.1 Hz, 1H), 7.51 – 7.34 (m, 5H), 7.24 – 7.17 (m, 2H), 7.09 (d, *J* = 8.2 Hz, 1H), 2.16 (s, 3H); **<sup>13</sup>C NMR (125 MHz, CDCl<sub>3</sub>)** δ 163.9, 139.2, 136.4, 134.7, 132.5, 131.1, 128.8, 127.6, 127.3, 125.7, 124.9, 124.3, 117.3, 17.9.

### 3-Ethyl-4-phenylisoquinolin-1(2H)-one (3na)<sup>13</sup>

### 4-Ethyl-3-phenylisoquinolin-1(2H)-one (3na')<sup>13</sup>

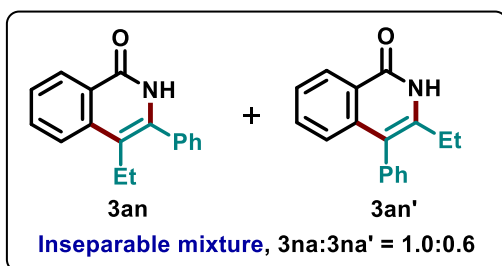

Compounds **3na** and **3na'** were obtained as an inseparable mixture in ratio 1.0:0.6. Yellow solid (50.0 mg, 67%); eluent (30-35% ethyl acetate in hexane); **<sup>1</sup>H NMR (500 MHz, CDCl<sub>3</sub>)** δ 11.79 (brs, 0.6H), 10.19 (brs, 1H), 8.46 (dd, *J* = 8.1, 0.9 Hz, 1H),

8.36 (dd, *J* = 8.0, 0.8 Hz, 0.6H), 7.78 (d, *J* = 8.1 Hz, 1H), 7.76 – 7.70 (m, 1H), 7.54 – 7.35 (m, 9H), 7.29 – 7.24 (m, 1.2H), 7.07 (d, *J* = 8.1 Hz, 0.6H), 2.68 (q, *J* = 7.5 Hz, 2H), 2.51 (q, *J* = 7.6 Hz, 1.2H), 1.25 (t, *J* = 7.6 Hz, 1.8H), 1.20 (t, *J* = 7.5 Hz, 3H); **<sup>13</sup>C NMR (125 MHz, CDCl<sub>3</sub>)** δ 164.2, 162.7, 140.5, 139.1, 137.7, 137.0, 136.3, 135.2, 132.6, 132.2, 131.0, 129.0, 128.6, 127.9, 127.4, 127.1, 126.1, 125.8, 125.4, 125.0, 124.3, 123.6, 116.2, 115.6, 24.8, 20.4, 15.3, 13.9.

### 3-(Pent-1-yn-1-yl)-4-propylisoquinolin-1(2H)-one (5aa).<sup>14</sup>

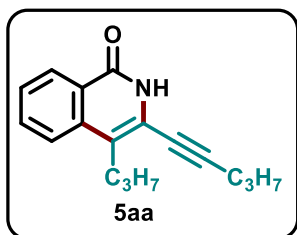

Yellow solid (43.4 mg, 57%); eluent (20-25% ethyl acetate in hexane); **<sup>1</sup>H NMR (500 MHz, CDCl<sub>3</sub>)** δ 10.10 (brs, 1H), 8.44 (d, *J* = 7.8 Hz, 1H), 7.72 – 7.65 (m, 2H), 7.50 – 7.44 (m, 1H), 2.90 – 2.84 (m, 2H), 2.49 (t, *J* = 7.0 Hz, 2H), 1.74 – 1.60 (m, 4H), 1.10 (t, *J* = 7.3 Hz, 3H), 1.01 (t, *J* = 7.4 Hz, 3H). **<sup>13</sup>C NMR (125 MHz, CDCl<sub>3</sub>)** δ

162.7, 137.2, 132.4, 127.9, 126.5, 126.2, 123.5, 120.8, 120.7, 97.7, 74.4, 30.4, 23.0, 21.8, 21.5, 14.1, 13.5.

### 4-Butyl-3-(hex-1-yn-1-yl)isoquinolin-1(2H)-one (5ab).<sup>14</sup>

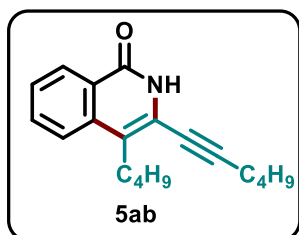

Yellow solid (51.5 mg, 61%); eluent (20-25% ethyl acetate in hexane); **<sup>1</sup>H NMR (500 MHz, CDCl<sub>3</sub>)** δ 9.06 (brs, 1H), 8.43 (d, *J* = 8.0 Hz, 1H), 7.72 – 7.66 (m, 2H), 7.50 – 7.46 (m, 1H), 2.91 – 2.85 (m, 2H), 2.50 (t, *J* = 6.9 Hz, 2H), 1.65 – 1.56 (m, 4H), 1.54 – 1.49 (m, 2H), 1.48 – 1.41 (m, 2H), 0.99 – 0.95 (m, 6H); **<sup>13</sup>C NMR (125**

**MHz, CDCl<sub>3</sub>**)  $\delta$  162.9, 137.2, 132.4, 127.9, 126.4, 126.3, 123.5, 120.9, 120.8, 97.8, 74.2, 31.9, 30.4, 28.2, 22.7, 22.0, 19.2, 13.9, 13.6.

**4-butyl-3-(hex-1-yn-1-yl)-7-methylisoquinolin-1(2H)-one (5bb).<sup>14</sup>**

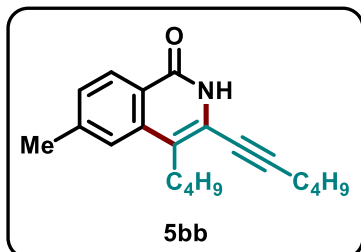

Yellow solid (48.8 mg, 55%); eluent (20-25% ethyl acetate in hexane); **<sup>1</sup>H NMR (500 MHz, CDCl<sub>3</sub>)**  $\delta$  10.31 (brs, 1H), 8.33 (d,  $J$  = 8.2 Hz, 1H), 7.43 (s, 1H), 7.28 (dd,  $J$  = 8.2, 0.8 Hz, 1H), 2.90 – 2.83 (m, 2H), 2.54 – 2.48 (m, 5H), 1.68 – 1.61 (m, 2H), 1.61 – 1.50 (m, 4H), 1.49 – 1.40 (m, 2H), 0.99 – 0.94 (m, 6H);

**<sup>13</sup>C NMR (125 MHz, CDCl<sub>3</sub>)**  $\delta$  162.6, 142.9, 137.3, 128.0, 127.9, 124.0, 123.3, 120.7, 120.7, 97.6, 74.3, 31.9, 30.4, 28.2, 22.7, 22.2, 22.0, 19.2, 14.0, 13.6.

**3-(Hept-1-yn-1-yl)-4-pentylisoquinolin-1(2H)-one (5ac).<sup>14</sup>**

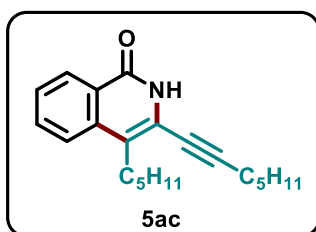

Yellow solid (35.5 mg, 38%); eluent (20-25% ethyl acetate in hexane); **<sup>1</sup>H NMR (500 MHz, CDCl<sub>3</sub>)**  $\delta$  10.24 (brs, 1H), 8.45 (d,  $J$  = 8.1 Hz, 1H), 7.71 – 7.65 (m, 2H), 7.49 – 7.44 (m, 1H), 2.91 – 2.85 (m, 2H), 2.51 (t,  $J$  = 7.1 Hz, 2H), 1.71 – 1.65 (m, 2H), 1.65 – 1.57 (m, 2H), 1.51 – 1.45 (m, 2H), 1.44 – 1.33 (m, 6H), 0.95 – 0.88 (m, 6H); **<sup>13</sup>C NMR (125 MHz, CDCl<sub>3</sub>)**  $\delta$  162.6, 137.2, 132.5, 127.9, 126.5, 126.3, 123.5, 121.0, 120.6, 97.9, 74.2, 31.8, 31.1, 29.5, 28.5, 28.1, 22.5, 22.2, 19.5, 14.0, 13.9.

**4-Hexyl-3-(oct-1-yn-1-yl)isoquinolin-1(2H)-one (5ad).<sup>14</sup>**

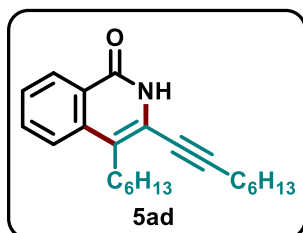

Yellow solid (40.5 mg, 40%); eluent (20-25% ethyl acetate in hexane); **<sup>1</sup>H NMR (500 MHz, CDCl<sub>3</sub>)**  $\delta$  9.37 (brs, 1H), 8.43 (d,  $J$  = 8.1 Hz, 1H), 7.72 – 7.65 (m, 2H), 7.47 (ddd,  $J$  = 8.1, 6.5, 1.8 Hz, 1H), 2.90 – 2.85 (m, 2H), 2.49 (t,  $J$  = 7.1 Hz, 2H), 1.69 – 1.56 (m, 4H), 1.45 (m, 4H), 1.37 – 1.29 (m, 8H), 0.94 – 0.83 (m, 6H); **<sup>13</sup>C NMR (125 MHz, CDCl<sub>3</sub>)**  $\delta$  162.4, 137.2, 132.5, 128.0, 126.5, 126.3, 123.5, 121.1, 120.5, 97.9, 74.2, 31.7, 31.3, 29.8, 29.3, 28.6, 28.5, 28.3, 22.7, 22.5, 19.5, 14.09, 14.07.

**3-(5-Chloropent-1-yn-1-yl)-4-(3-chloropropyl)isoquinolin-1(2H)-one (5ae).<sup>14</sup>**

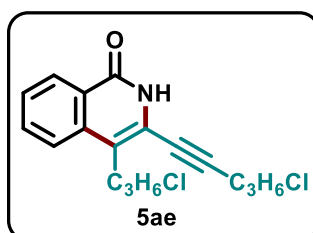

Yellow solid (56.1 mg, 58%); eluent (25-30% ethyl acetate in hexane); **<sup>1</sup>H NMR (500 MHz, CDCl<sub>3</sub>)**  $\delta$  10.87 (brs, 1H), 8.47 (d,  $J$  = 8.1 Hz, 1H), 7.77 – 7.68 (m, 2H), 7.56 – 7.48 (m, 1H), 3.81 (t,  $J$  = 6.4 Hz, 2H), 3.65 (t,  $J$  = 6.2 Hz, 2H), 3.11 – 3.06 (m, 2H), 2.76 (t,  $J$

= 6.8 Hz, 2H), 2.19 – 2.13 (m, 2H), 2.13 – 2.04 (m, 2H); **<sup>13</sup>C NMR (125 MHz, CDCl<sub>3</sub>)** δ 162.9, 136.8, 132.8, 128.1, 127.0, 126.3, 123.3, 121.0, 119.6, 96.3, 74.7, 44.8, 43.6, 32.5, 30.9, 25.8, 17.0.

#### 4-Phenyl-3-(phenylethynyl)isoquinolin-1(2H)-one (3af).<sup>1</sup>

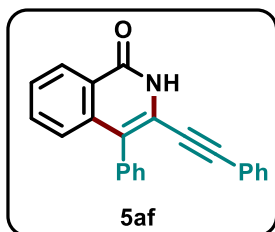

Yellow solid (65.6 mg, 68%); eluent (25-30% ethyl acetate in hexane);

**<sup>1</sup>H NMR (500 MHz, DMSO-*D*<sub>6</sub>)**, δ 11.94 (brs, 1H), 8.30 (d, *J* = 7.9 Hz, 1H), 7.68 (t, *J* = 7.6 Hz, 1H), 7.59 – 7.52 (m, 3H), 7.52 – 7.44 (m, 3H), 7.41 – 7.34 (m, 3H), 7.26 (d, *J* = 8.1 Hz, 1H), 7.22 – 7.18 (m, 2H);

**<sup>13</sup>C NMR (125 MHz, DMSO-*D*<sub>6</sub>)** δ 161.2, 136.9, 135.3, 132.9, 131.2,

131.0, 129.6, 128.9, 128.5, 128.1, 127.5, 127.2, 126.2, 125.3, 122.7, 121.2, 121.1, 95.1, 83.8.

#### 4-(*m*-Tolyl)-3-(*o*-tolylethynyl)isoquinolin-1(2H)-one (5ag).

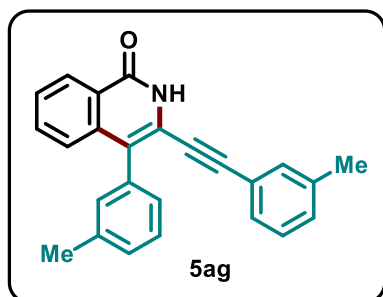

Yellow solid (69.2 mg, 66%); eluent (30-35% ethyl acetate in hexane); m.p. 178 – 180 °C; **<sup>1</sup>H NMR (500 MHz, DMSO-*D*<sub>6</sub>)** δ 11.90 (brs, 1H), 8.29 (dd, *J* = 8.1, 1.1 Hz, 1H), 7.72 –

7.66 (m, 1H), 7.56 (t, *J* = 7.5 Hz, 1H), 7.43 (t, *J* = 7.6 Hz, 1H), 7.33 – 7.20 (m, 6H), 7.03 – 7.00 (m, 2H), 2.40 (s, 3H), 2.26 (s, 3H); **<sup>13</sup>C NMR (125 MHz, DMSO-*D*<sub>6</sub>)** δ 161.1, 138.1, 137.5,

136.8, 135.1, 132.7, 131.5, 131.4, 130.2, 128.7, 128.5, 128.24, 128.17, 128.0, 127.3, 127.1, 126.1, 125.3, 122.6, 121.1, 121.0, 95.3, 83.6, 21.0, 20.7; **HRMS (ESI)** *m/z* calcd. for C<sub>25</sub>H<sub>20</sub>NO [M+H]<sup>+</sup>: 350.1545, found: 350.1549.

#### 4-(2-Fluorophenyl)-3-[(2-fluorophenyl)ethynyl]isoquinolin-1(2H)-one (5ah).

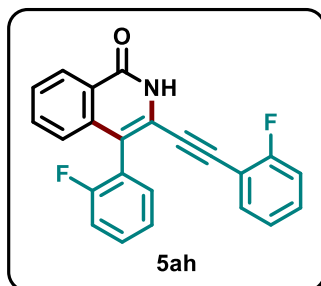

Yellow solid (77.2 mg, 72%); eluent (30-35% ethyl acetate in hexane); m.p. 227 – 229 °C; **<sup>1</sup>H NMR (500 MHz, DMSO-*D*<sub>6</sub>)** δ 12.04 (brs, 1H), 8.31 (dd, *J* = 8.5, 1.0 Hz, 1H), 7.73 – 7.69 (m, 1H),

7.62 – 7.54 (m, 2H), 7.52 – 7.44 (m, 2H), 7.41 – 7.35 (m, 2H), 7.34 – 7.30 (td, *J* = 7.5, 1.6 Hz, 1H), 7.25 (t, *J* = 9.0 Hz, 1H), 7.22 (t, *J* = 7.6 Hz, 1H), 7.14 (d, *J* = 8.1 Hz, 1H); **<sup>13</sup>C NMR (125 MHz, DMSO-*D*<sub>6</sub>)** δ 162.5 (d, *J*<sub>C-F</sub> = 252.1 Hz), 161.1, 159.8 (d, *J*<sub>C-F</sub> = 245.0 Hz), 136.3, 133.3, 133.2, 132.9,

131.9 (d, *J*<sub>C-F</sub> = 7.6 Hz), 130.7 (d, *J*<sub>C-F</sub> = 8.0 Hz), 127.6, 127.1, 126.1, 124.8, 124.7, 124.6,

122.3 (d,  $J_{C-F} = 16.3$  Hz), 121.8, 116.7, 115.8 (d,  $J_{C-F} = 11.1$  Hz), 115.6 (d,  $J_{C-F} = 13.0$  Hz), 109.3 (d,  $J_{C-F} = 15.4$  Hz), 88.7, 87.4 (d,  $J_{C-F} = 1.8$  Hz);  **$^{19}\text{F}$  NMR (470 MHz,  $\text{CDCl}_3$ )**  $\delta$  -109.3, -113.6; **HRMS (ESI)**  $m/z$  calcd. for  $\text{C}_{23}\text{H}_{14}\text{F}_2\text{NO}$   $[\text{M}+\text{H}]^+$ : 358.1043, found: 358.1044.

**4-[4-(*tert*-Butyl)phenyl]-3-[4-(*tert*-butyl)phenyl]ethynylisoquinolin-1(2*H*)-one (5ai).**

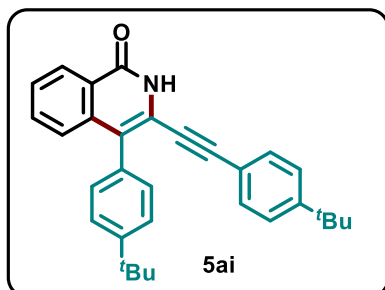

Yellow solid (70.4 mg, 54%); eluent (30-35% ethyl acetate in hexane); m.p. 268 – 270 °C;  **$^1\text{H}$  NMR (500 MHz,  $\text{CDCl}_3$ )**  $\delta$  9.51 (brs, 1H), 8.48 (d,  $J = 7.8$  Hz, 1H), 7.62 – 7.58 (m, 1H), 7.55 – 7.49 (m, 3H), 7.45 (d,  $J = 8.1$  Hz, 1H), 7.40 (d,  $J = 8.2$  Hz, 2H), 7.29 (d,  $J = 8.3$  Hz, 2H), 7.16 – 7.12 (m, 2H), 1.43 (s, 9H), 1.29 (s, 9H);  **$^{13}\text{C}$  NMR (125 MHz,  $\text{CDCl}_3$ )**  $\delta$  162.8, 152.4,

150.7, 137.7, 132.5, 131.3, 130.8, 127.6, 127.0, 126.0, 125.8, 125.2, 125.1, 124.0, 121.3, 118.8, 96.3, 83.0, 34.8, 34.7, 31.4, 31.1; (one carbon is missing in the aromatic region due to the overlap). **HRMS (ESI)**  $m/z$  calcd. for  $\text{C}_{31}\text{H}_{32}\text{NO}$   $[\text{M}+\text{H}]^+$ : 434.2484, found: 434.2484.

**12'-Phenyl-5'*H*-spiro[cyclohexane-1,7'-isoindolo[2,1-*b*]isoquinolin]-3-ene-2,5,5'-trione (6).<sup>2</sup>**

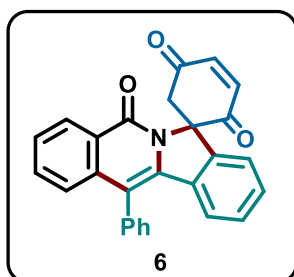

Yellow solid (60.6 mg, 75%); eluent (30-35% ethyl acetate in hexane);  **$^1\text{H}$  NMR (500 MHz,  $\text{CDCl}_3$ )**  $\delta$  8.46 (dd,  $J = 8.2, 1.0$  Hz, 1H), 7.65 – 7.59 (m, 4H), 7.52 (t,  $J = 7.5$  Hz, 1H), 7.47 – 7.41 (m, 2H), 7.29 – 7.25 (m, 1H), 7.23 (d,  $J = 8.2$  Hz, 1H), 7.20 (d,  $J = 7.7$  Hz, 1H), 7.17 (s, 2H), 7.15 – 7.11 (m, 1H), 6.41 (d,  $J = 8.2$  Hz, 1H), 4.91 (d,  $J = 16.0$  Hz, 1H), 2.97 (d,  $J = 16.0$  Hz, 1H);  **$^{13}\text{C}$  NMR (125 MHz,  $\text{CDCl}_3$ )**  $\delta$  195.2, 189.2, 160.3, 142.8, 141.4, 140.0, 138.9, 136.9, 134.5, 133.2, 132.7, 130.9,

130.8, 129.8, 129.7, 129.6, 129.5, 128.7, 127.5, 126.9, 125.6, 125.1, 125.0, 121.0, 115.3, 74.5, 45.9.

**Ethyl 2-(5-oxo-12-phenyl-5,7-dihydroisoindolo[2,1-*b*]isoquinolin-7-yl)acetate (7).<sup>3</sup>**

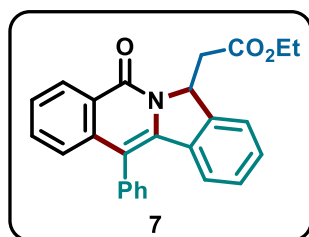

Yellow solid (24.0 mg, 60%); eluent (30-35% ethyl acetate in hexane);  **$^1\text{H}$  NMR (500 MHz,  $\text{CDCl}_3$ )**  $\delta$  8.54 (dd,  $J = 7.7, 1.0$  Hz, 1H), 7.63 – 7.43 (m, 7H), 7.37 – 7.30 (m, 2H), 7.20 (d,  $J = 8.0$  Hz, 1H), 7.09 (t,  $J = 7.7$  Hz, 1H), 6.38 (d,  $J = 7.9$  Hz, 1H), 6.01 (dd,  $J = 7.7, 3.6$  Hz, 1H), 4.11 (q,  $J = 7.1$  Hz, 2H), 3.73 (dd,  $J = 16.1, 3.7$  Hz, 1H), 3.06 (dd,  $J = 16.0, 7.7$  Hz, 1H), 1.15 (t,  $J = 7.1$  Hz, 3H);  **$^{13}\text{C}$  NMR (125 MHz,  $\text{CDCl}_3$ )**

$\delta$  170.4, 160.9, 141.6, 138.7, 137.9, 135.1, 133.5, 132.1, 131.1, 130.9, 129.5, 129.4, 128.43, 128.38, 127.3, 126.3, 125.2, 124.8, 123.9, 122.8, 114.5, 60.6, 56.0, 36.6, 14.0 (one carbon is missing in the aromatic region due to the overlap).

#### 5,6,13-Triphenyl-8H-isoquinolino[3,2-a]isoquinolin-8-one (8).<sup>4</sup>

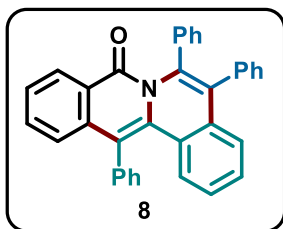

Yellow solid (33.2 mg, 70%); eluent (30-35% ethyl acetate in hexane); **<sup>1</sup>H NMR (500 MHz, CDCl<sub>3</sub>)**  $\delta$  8.25 (d,  $J$  = 8.0 Hz, 1H), 7.62 – 7.57 (m, 1H), 7.56 – 7.49 (m, 5H), 7.43 (t,  $J$  = 7.5 Hz, 1H), 7.34 (d,  $J$  = 8.3 Hz, 1H), 7.28 – 7.20 (m, 3H), 7.17 – 7.10 (m, 5H), 7.09 – 7.04 (m, 5H), 6.89 – 6.84 (m, 1H); **<sup>13</sup>C NMR (125 MHz, CDCl<sub>3</sub>)**  $\delta$  162.2, 138.5, 137.1, 136.2, 136.1, 133.7, 133.0, 132.3, 132.1, 131.4, 129.7, 129.0, 128.8, 128.4, 128.1, 127.9, 127.6, 127.4, 127.1, 126.9, 126.8, 126.7, 126.4, 126.3, 125.7, 125.6, 125.5, 116.9 (one carbon is missing in the aromatic region due to the overlap).

#### 2-(2-Benzyl-1-oxo-3,4-diphenyl-1,2-dihydroisoquinolin-8-yl)naphthalene-1,4-dione (9).

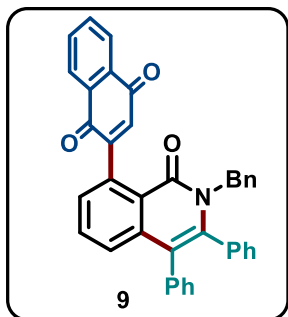

Brown solid (11 mg, 20%); eluent (30-35% ethyl acetate in hexane); **<sup>1</sup>H NMR (500 MHz, CDCl<sub>3</sub>)**  $\delta$  8.17 – 8.13 (m, 1H), 8.12 – 8.08 (m, 1H), 7.75 – 7.69 (m, 2H), 7.65 – 7.60 (m, 1H), 7.44 – 7.39 (m, 1H), 7.31 (dd,  $J$  = 8.2, 1.1 Hz, 1H), 7.21 – 7.12 (m, 6H), 7.12 – 7.00 (m, 5H), 6.92 (s, 1H), 6.88 – 6.74 (m, 4H), 5.08 (br s, 2H); **<sup>13</sup>C NMR (125 MHz, CDCl<sub>3</sub>)**  $\delta$  185.6, 183.9, 161.9, 155.0, 142.1, 138.4, 137.1, 136.2, 136.0, 133.9, 133.5, 133.4, 133.3, 132.6, 131.9, 131.5, 130.3, 130.2, 128.5, 128.20, 128.12, 128.1, 127.9, 127.6, 127.6, 127.5, 126.94, 126.87, 126.8, 126.8, 126.1, 123.9, 119.6, 49.1; **HRMS (ESI)**  $m/z$  calcd. for C<sub>38</sub>H<sub>25</sub>NaNO<sub>3</sub> [M+Na]<sup>+</sup>: 566.1732, found: 566.1737.

## 11. References

1. J. Liu, X. Jia and L. Huang, *Org. Lett.*, 2022, **24**, 6772-6776.
2. T. Zhou, L. Li, B. Li, H. Song and B. Wang, *Org. Lett.*, 2015, **17**, 4204-4207.
3. F. Wang, G.-Y. Song, Z.-Y. Du and X.-W. Li, *J. Org. Chem.*, 2011, **76**, 2926-2932.
4. B. Li, H. Feng, N. Wang, J. Ma, H. Song, S. Xu and B. Wang, *Chem.-Eur. J.*, 2012, **18**, 12873-12879.

5. T. K. Hyster and T. Rovis, *J. Am. Chem. Soc.*, 2010, **132**, 10565–10569.
6. X. Yu, K. Chen, S. Guo, P. Shi, C. Song and J. Zhu, *Org. Lett.* 2017, **19**, 5348–5351.
7. X. Li, R. Zhang, Y. Qi, Q. Zhao and T. Yao, *Org. Chem. Front.*, 2021, **8**, 1190–1196.
8. S. Wang, L. Yao, J.-S. Wang, J. Ying and X.-F. Wu, *Mol. Catal.*, 2022, **524**, 112303.
9. B. Su, J.-B. Wei, W.-L. Wu and Z.-J. Shi, *ChemCatChem*, 2015, **7**, 2986–2990.
10. M. Liu, J.-L. Niu, D. Yang and M.-P. Song, *J. Org. Chem.*, 2020, **85**, 4067–4078.
11. E. Petrova, D. Rasina and A. Jirgensons, *Eur. J. Org. Chem.*, 2017, 1773–1779.
12. M. Liu, J. L. Niu, D. Yang and M. P. Song, *J. Org. Chem.*, 2020, **85**, 4067–4078.
13. X. Yu, K. Chen, S. Guo, P. Shi, C. Song and J. Zhu, *Org. Lett.*, 2017, **19**, 5348–5351.
14. A. Ghosh, G.T. Sapkal and A. B. Pawar, *J. Org. Chem.*, 2023, **88**, 4704–4719.



# *Appendix*

## **Spectral Copies of $^1\text{H}$ and $^{13}\text{C}$ NMR of Compounds Obtained in this Study**

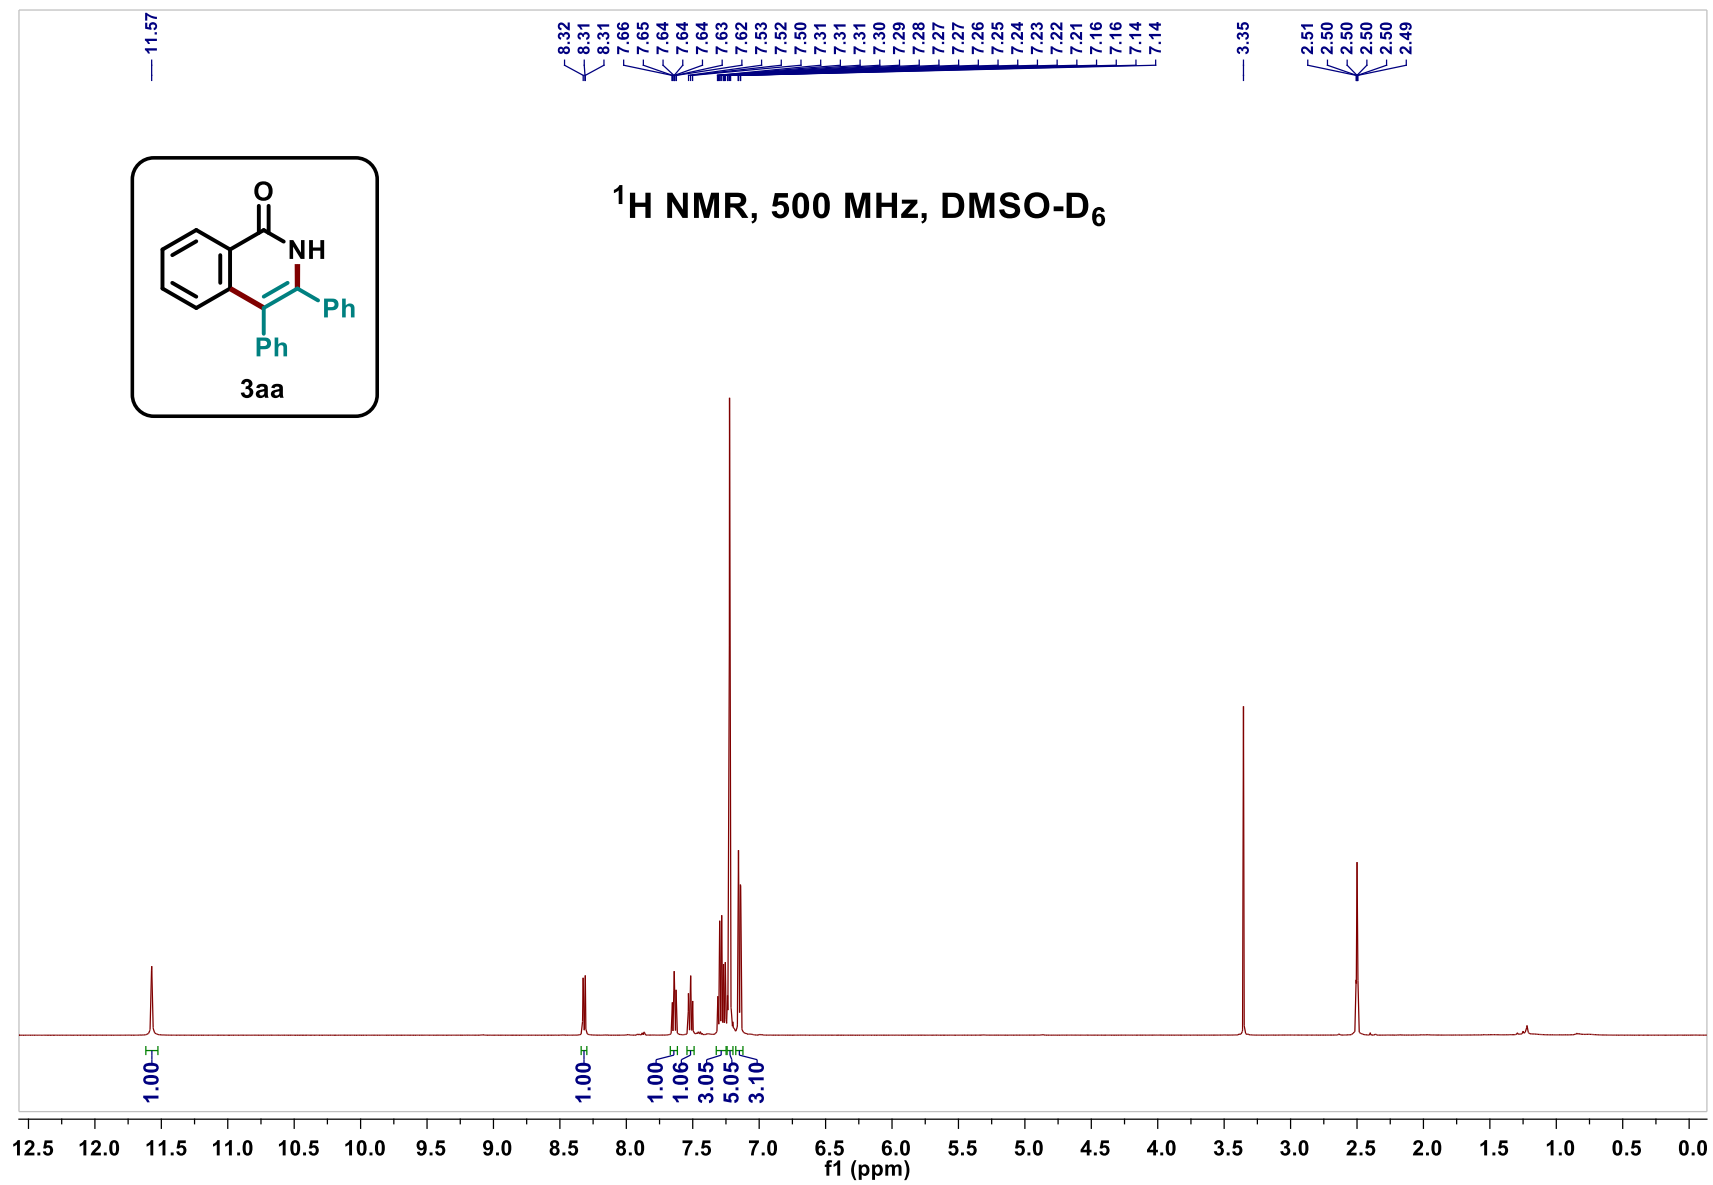

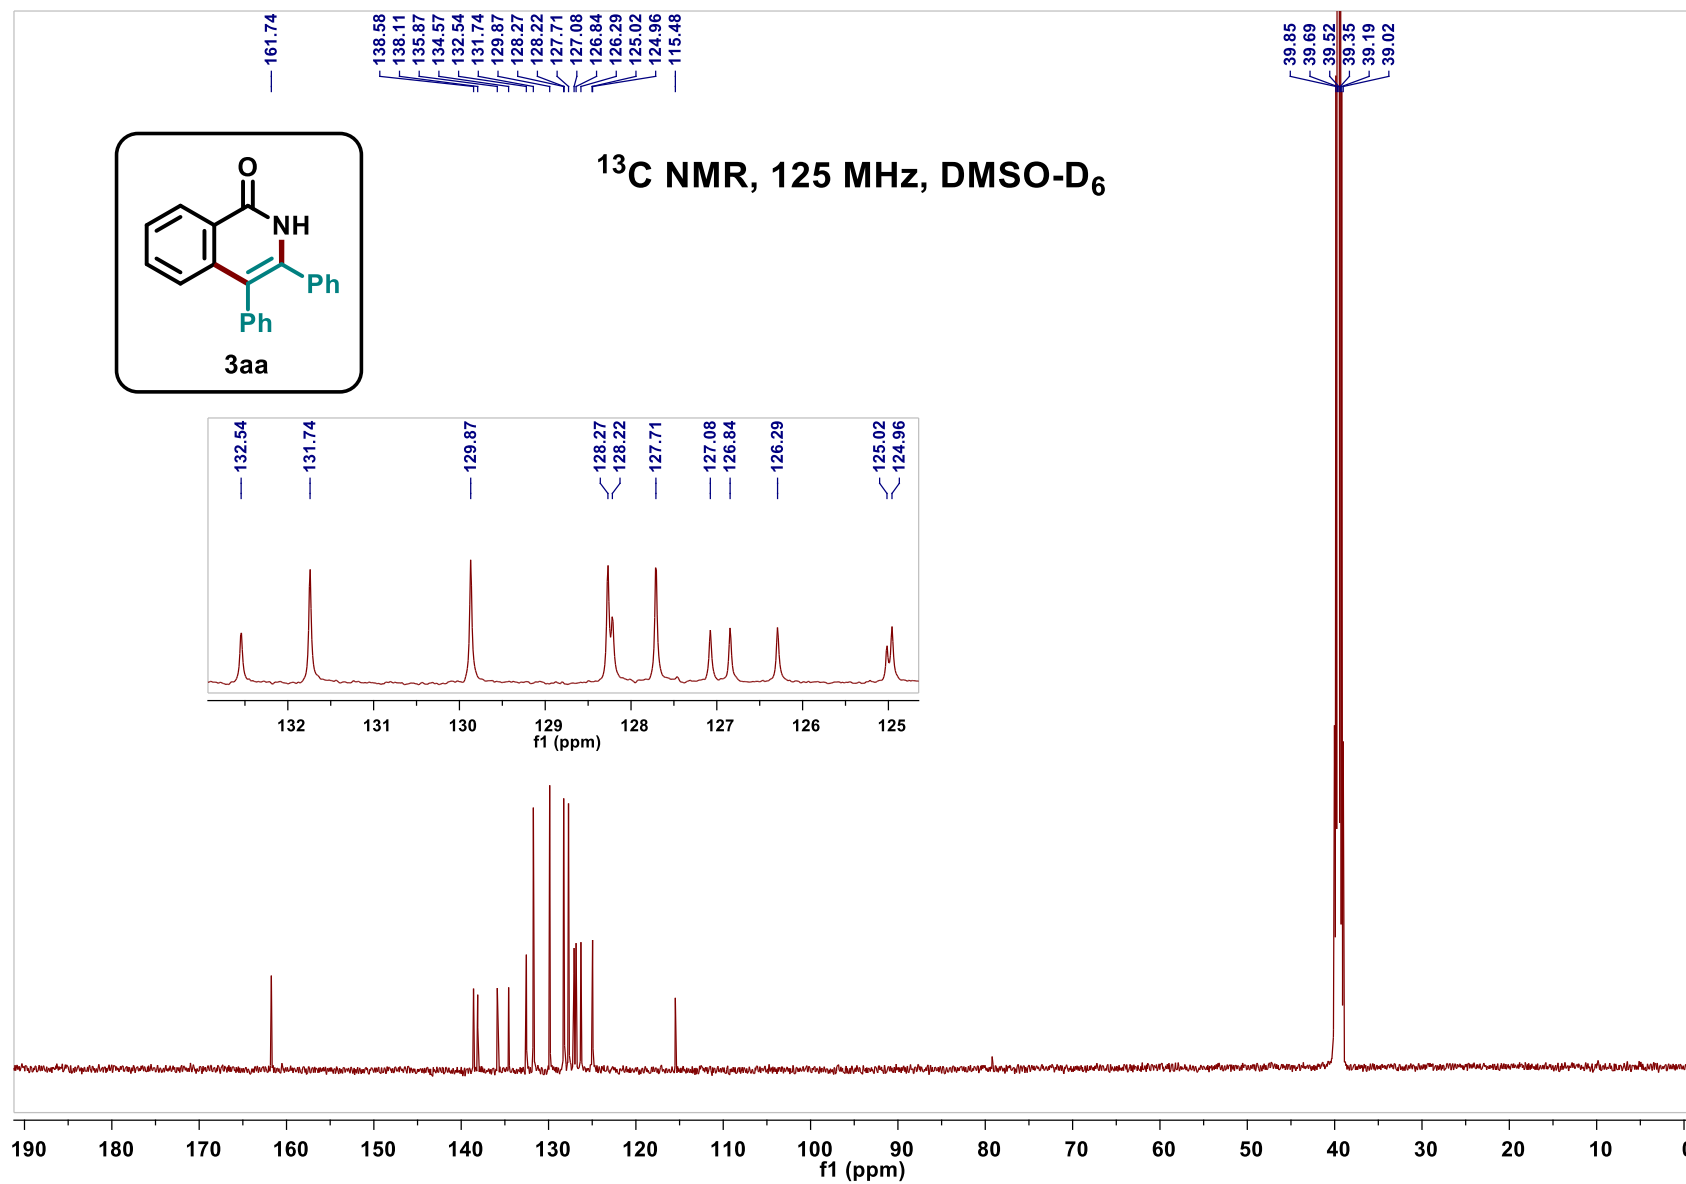

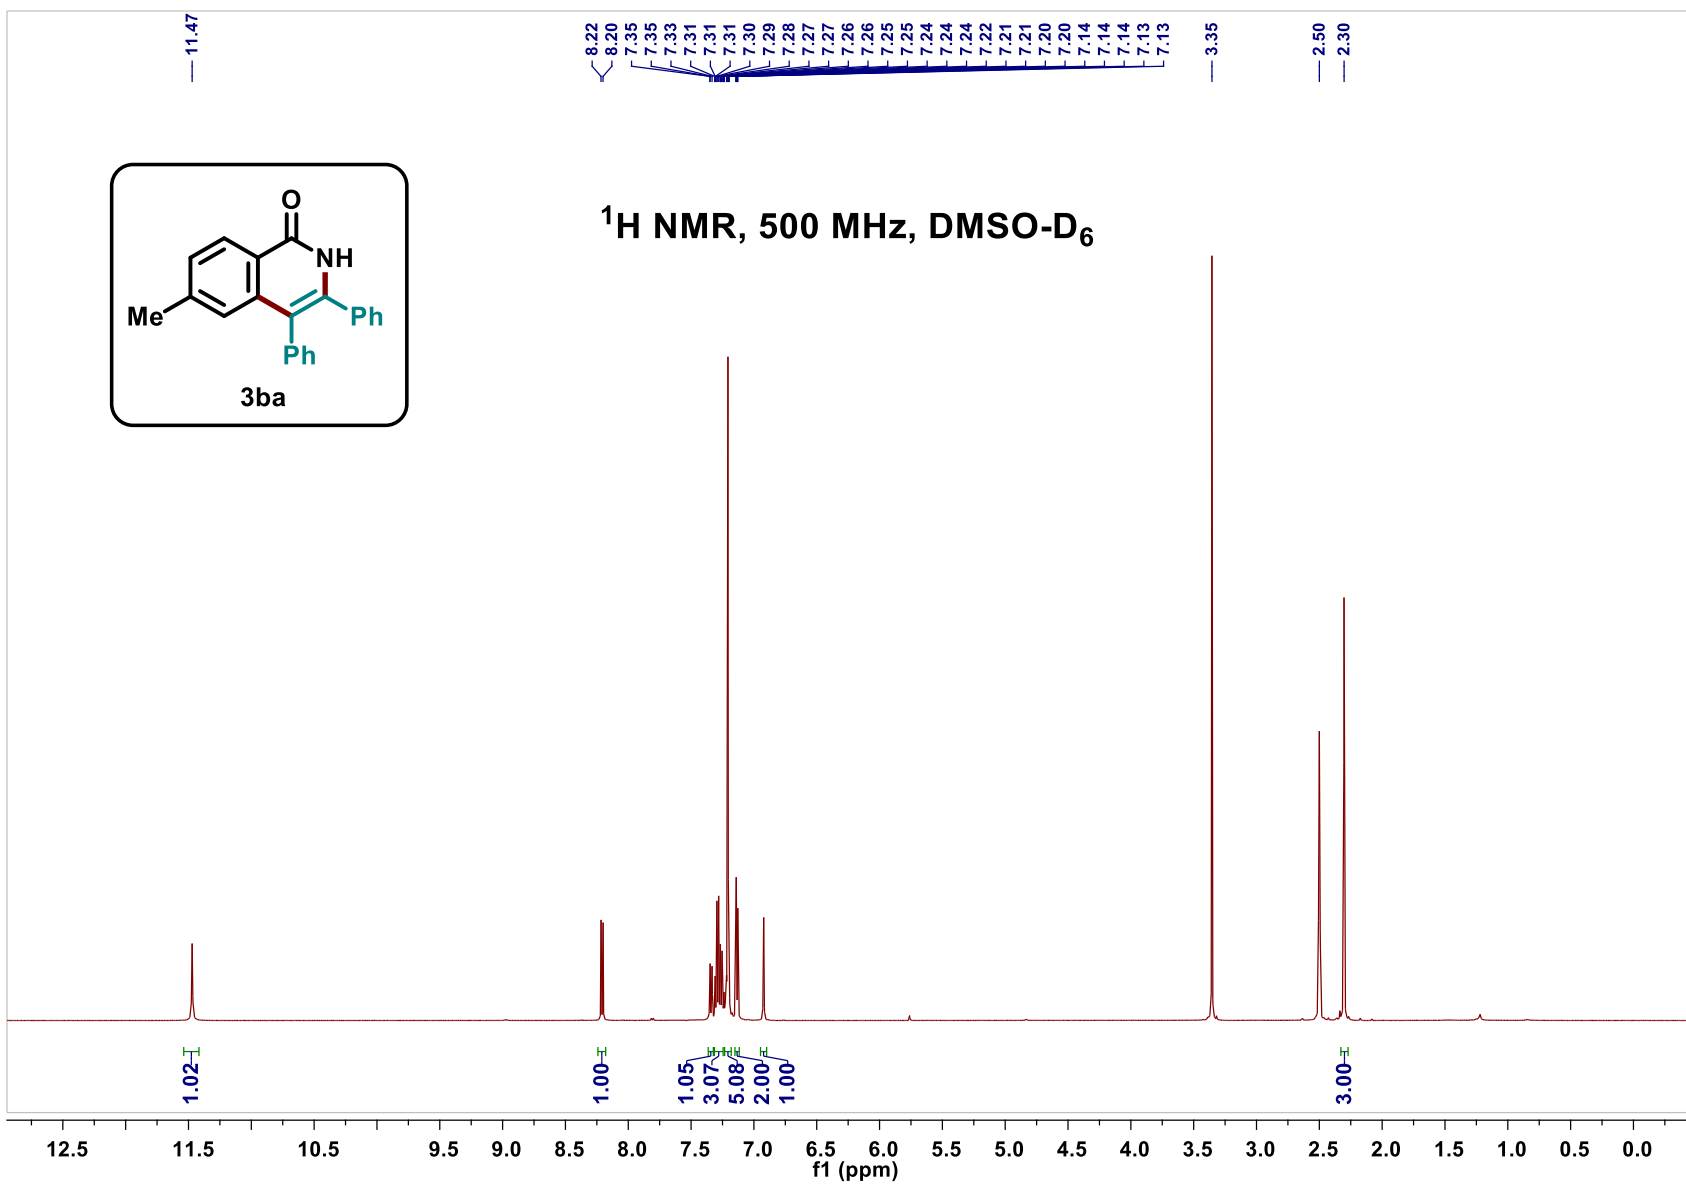

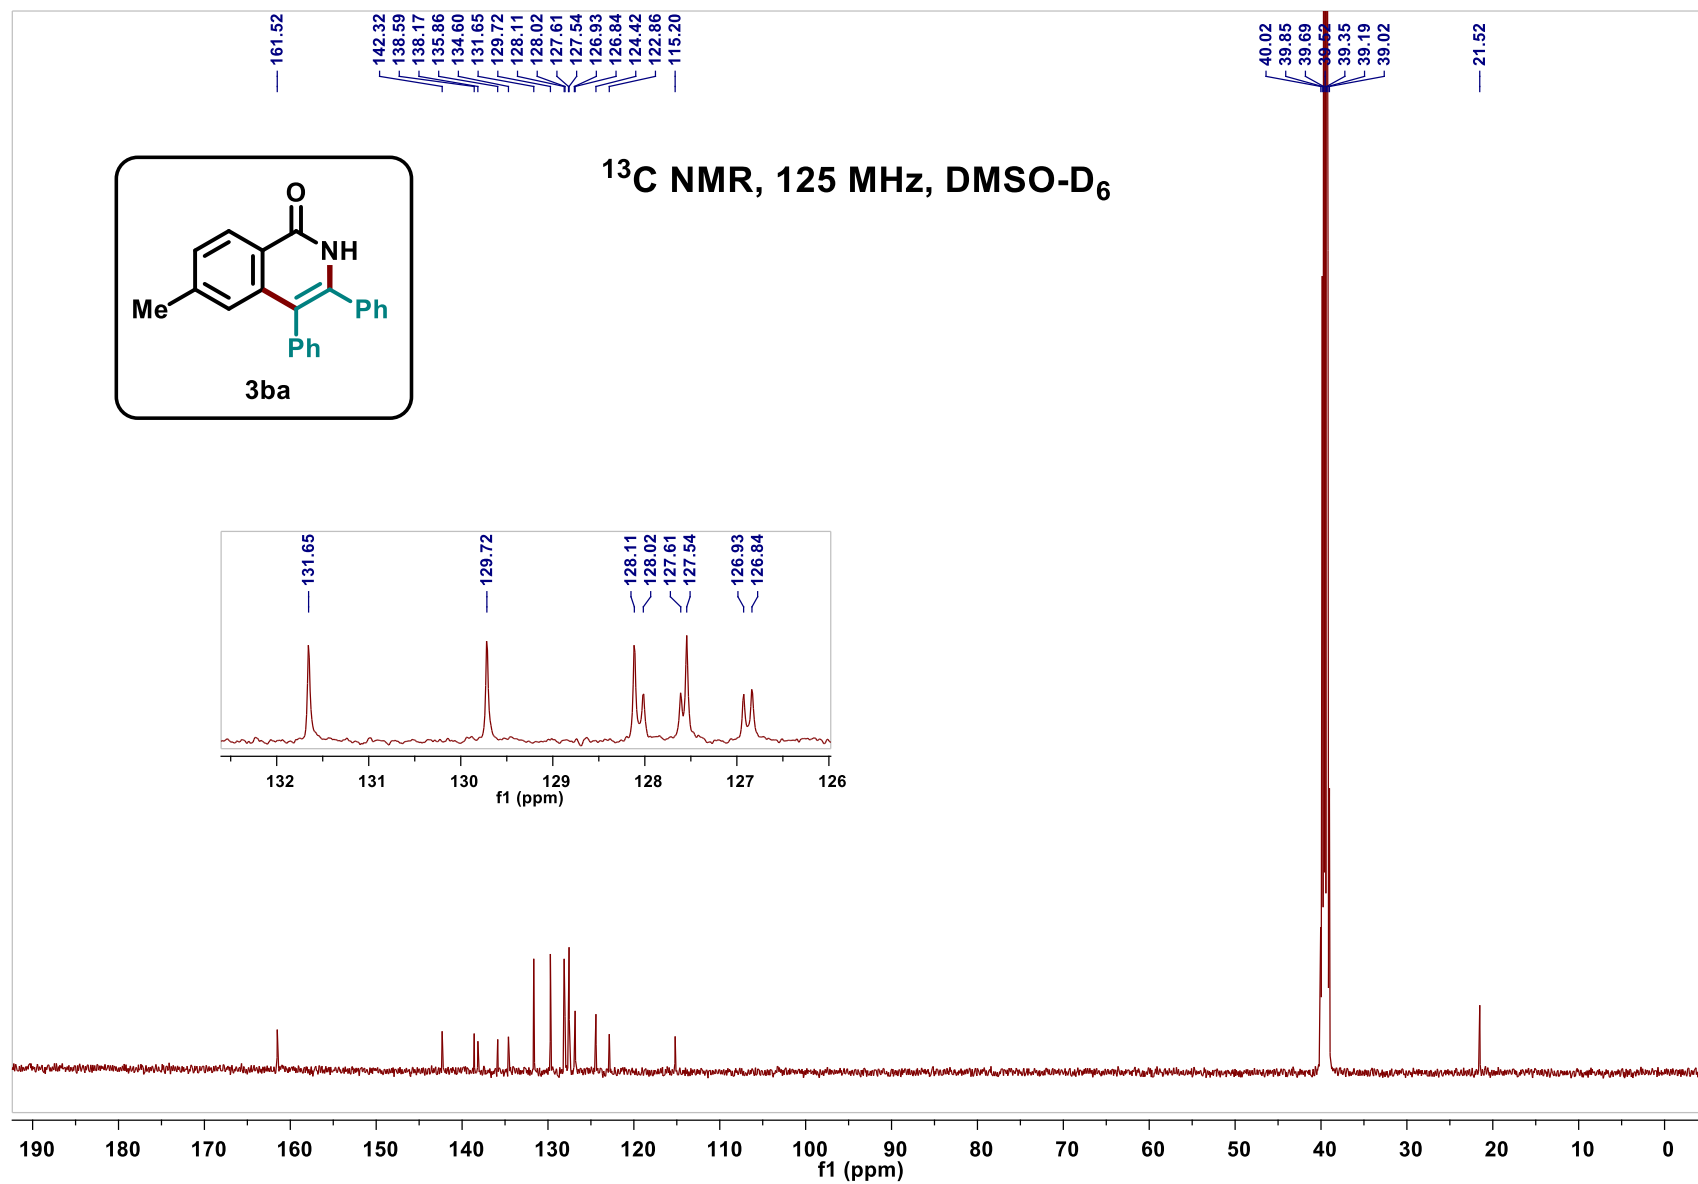

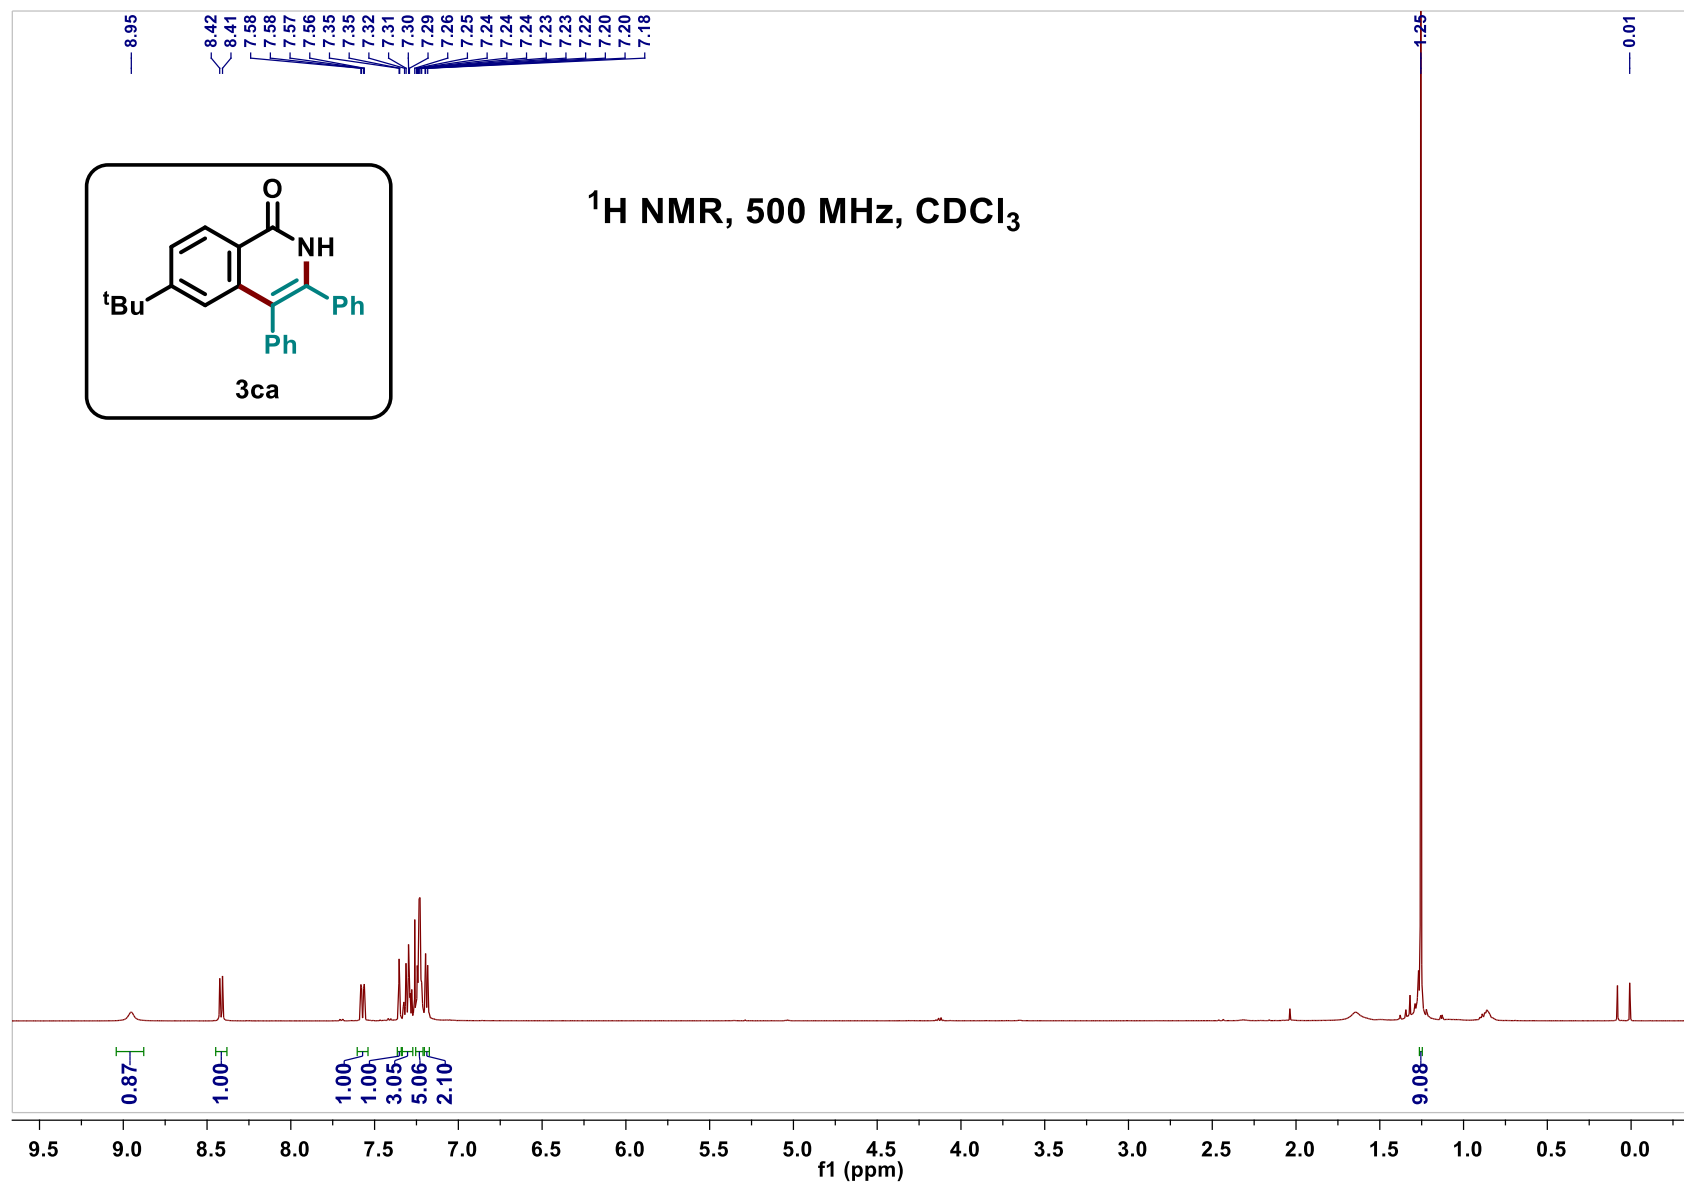

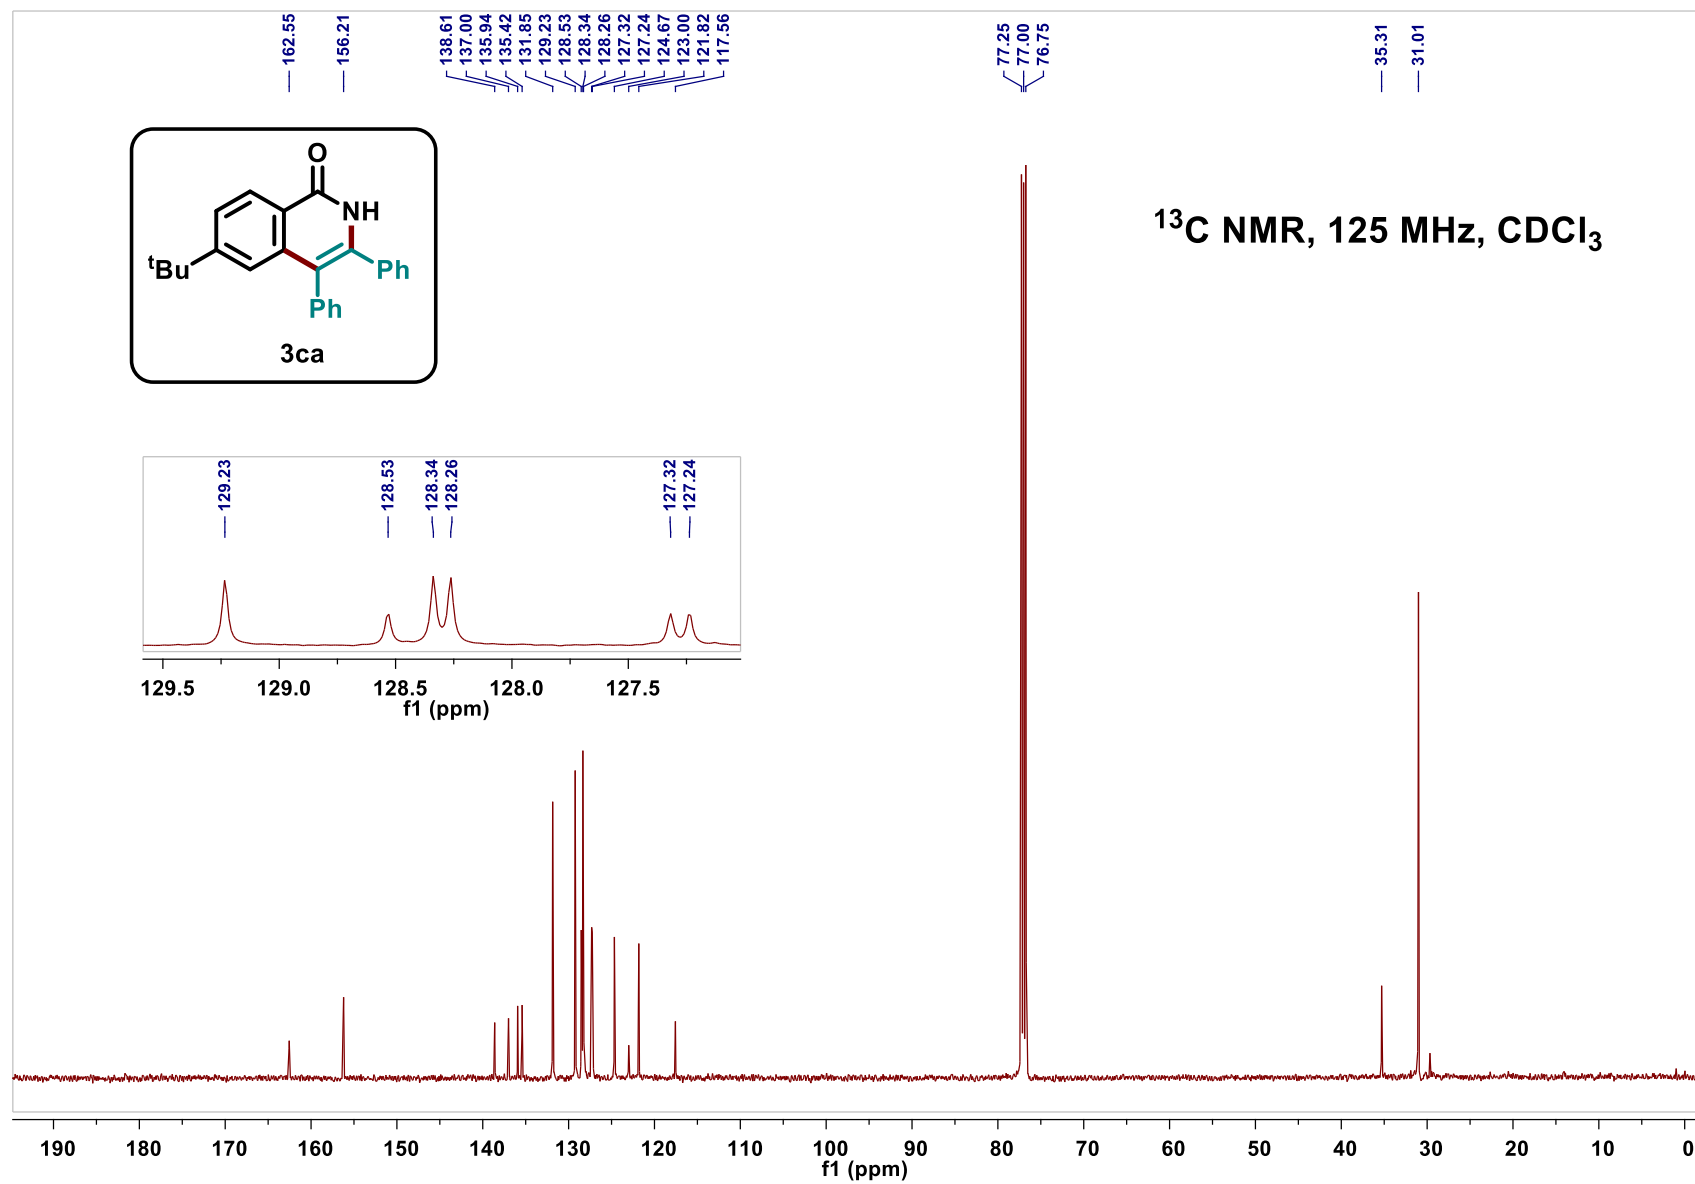

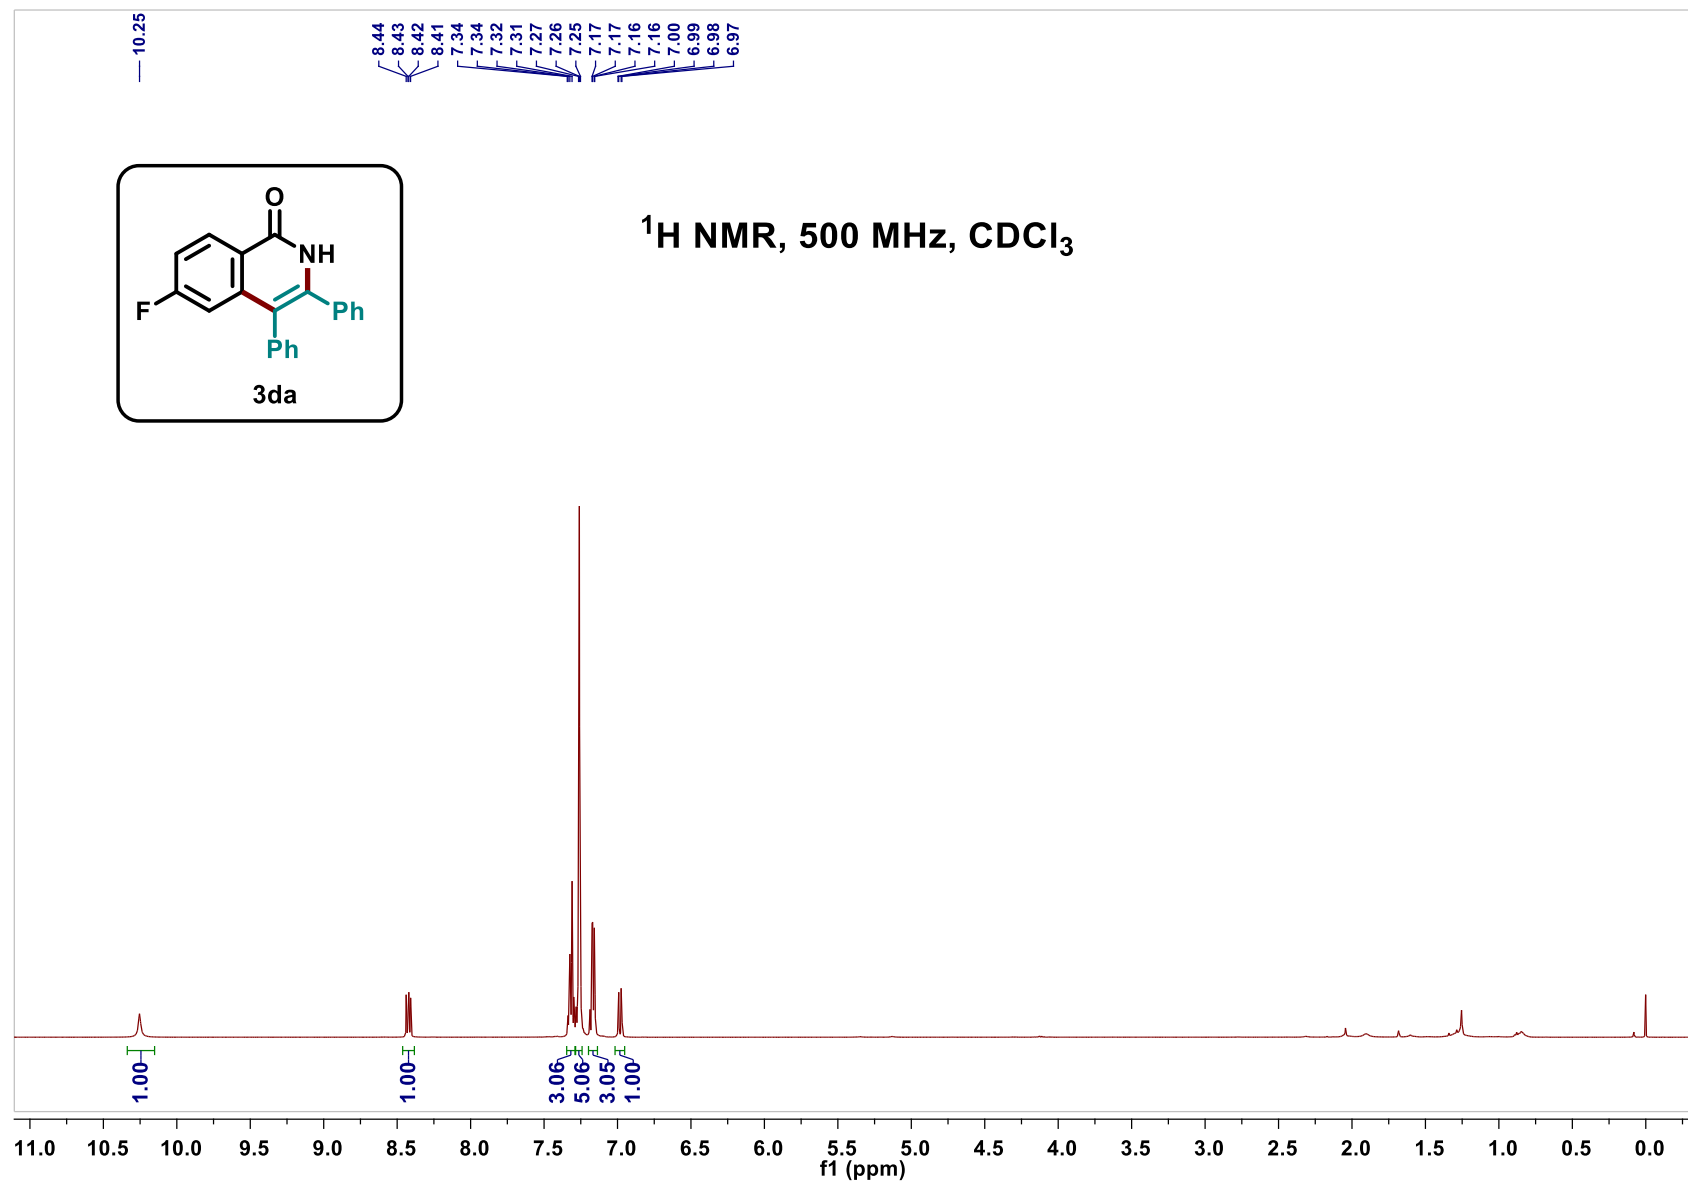



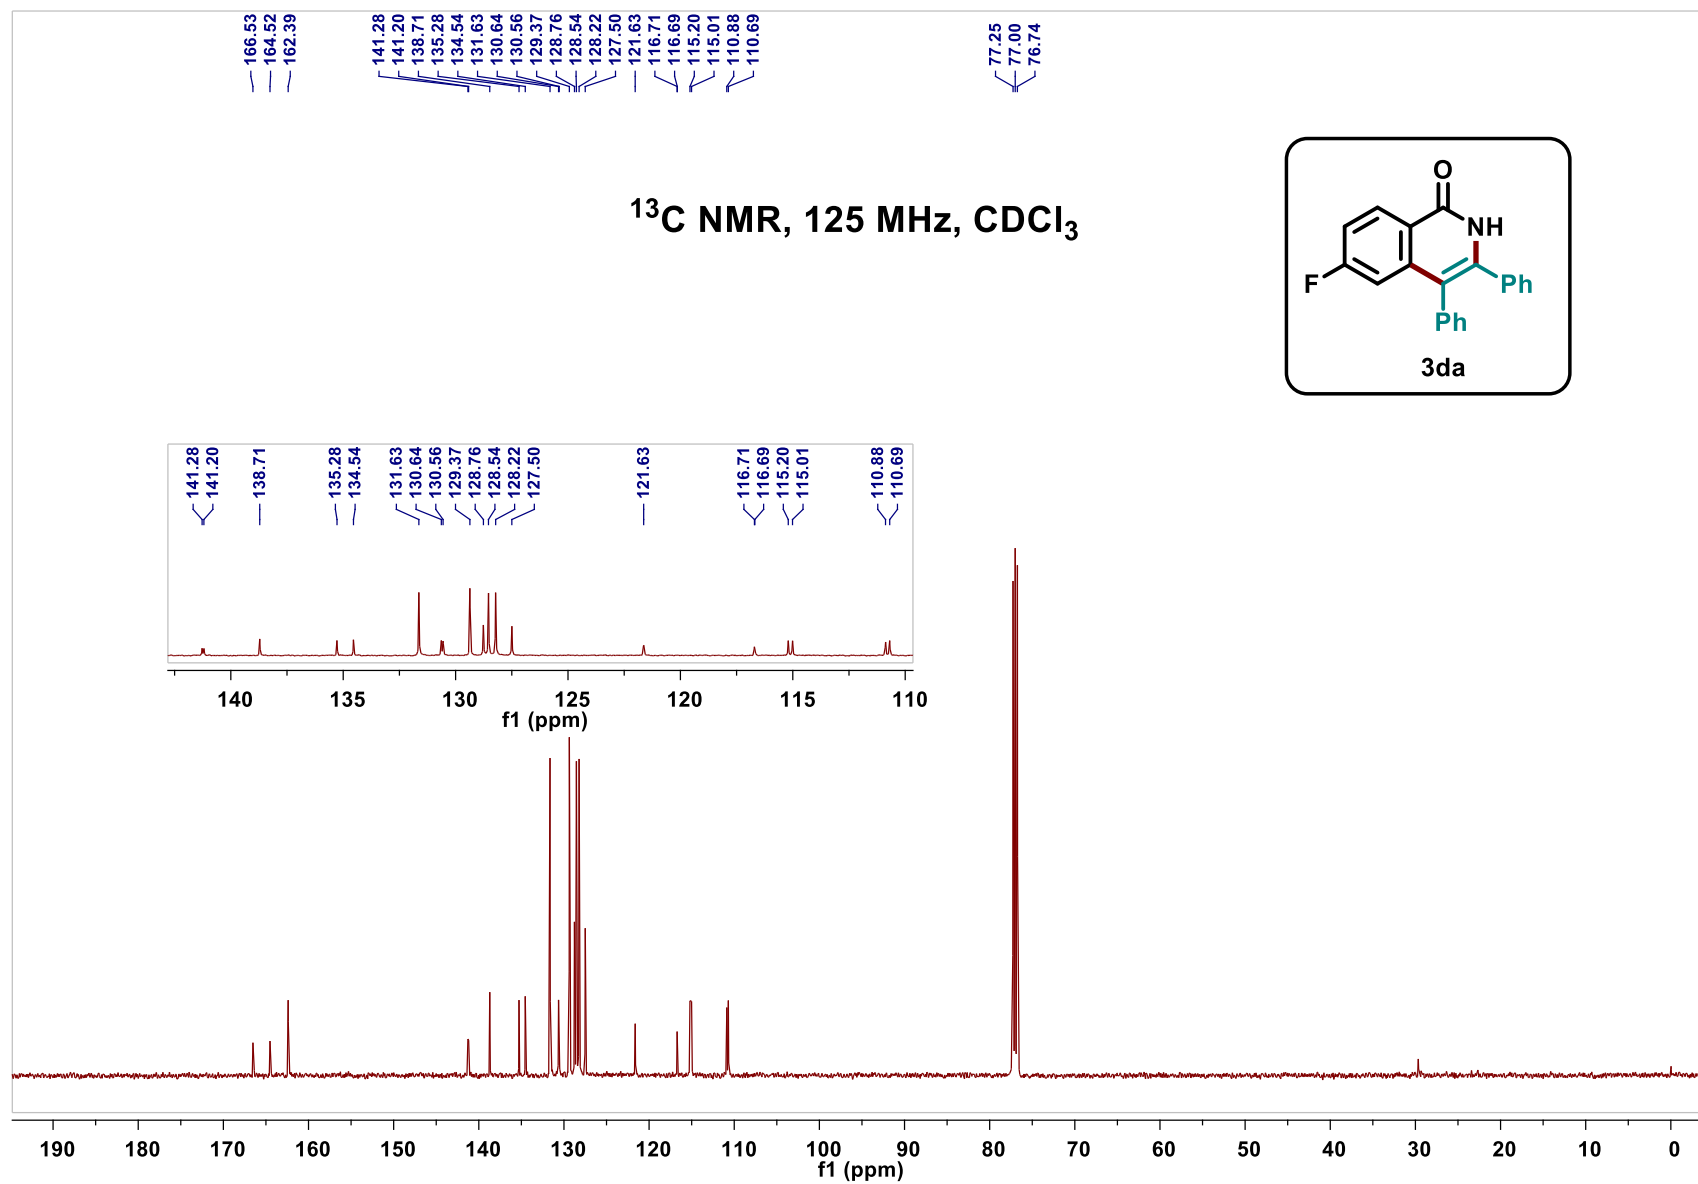

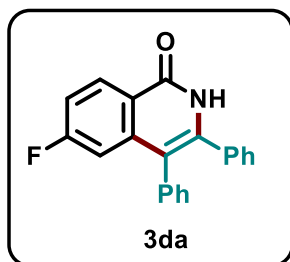

$^{19}\text{F}$  NMR, 470 MHz,  $\text{CDCl}_3$

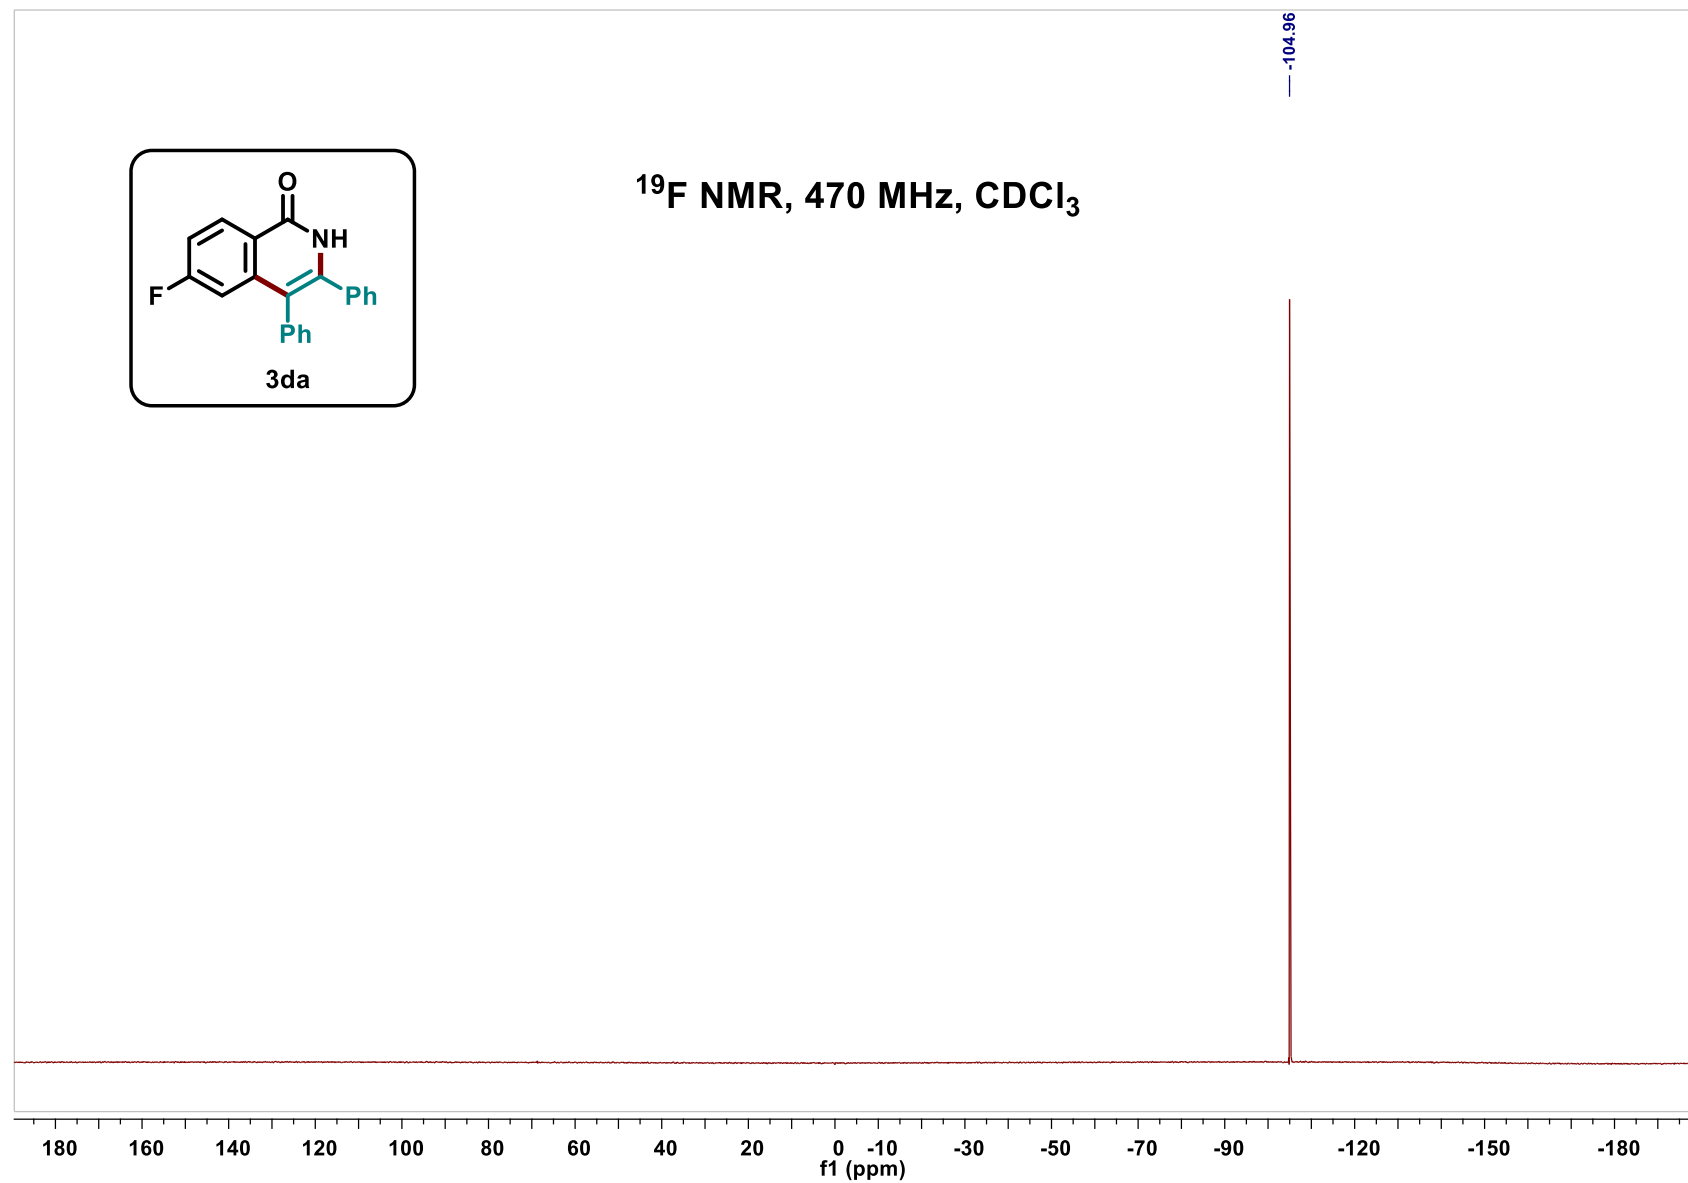

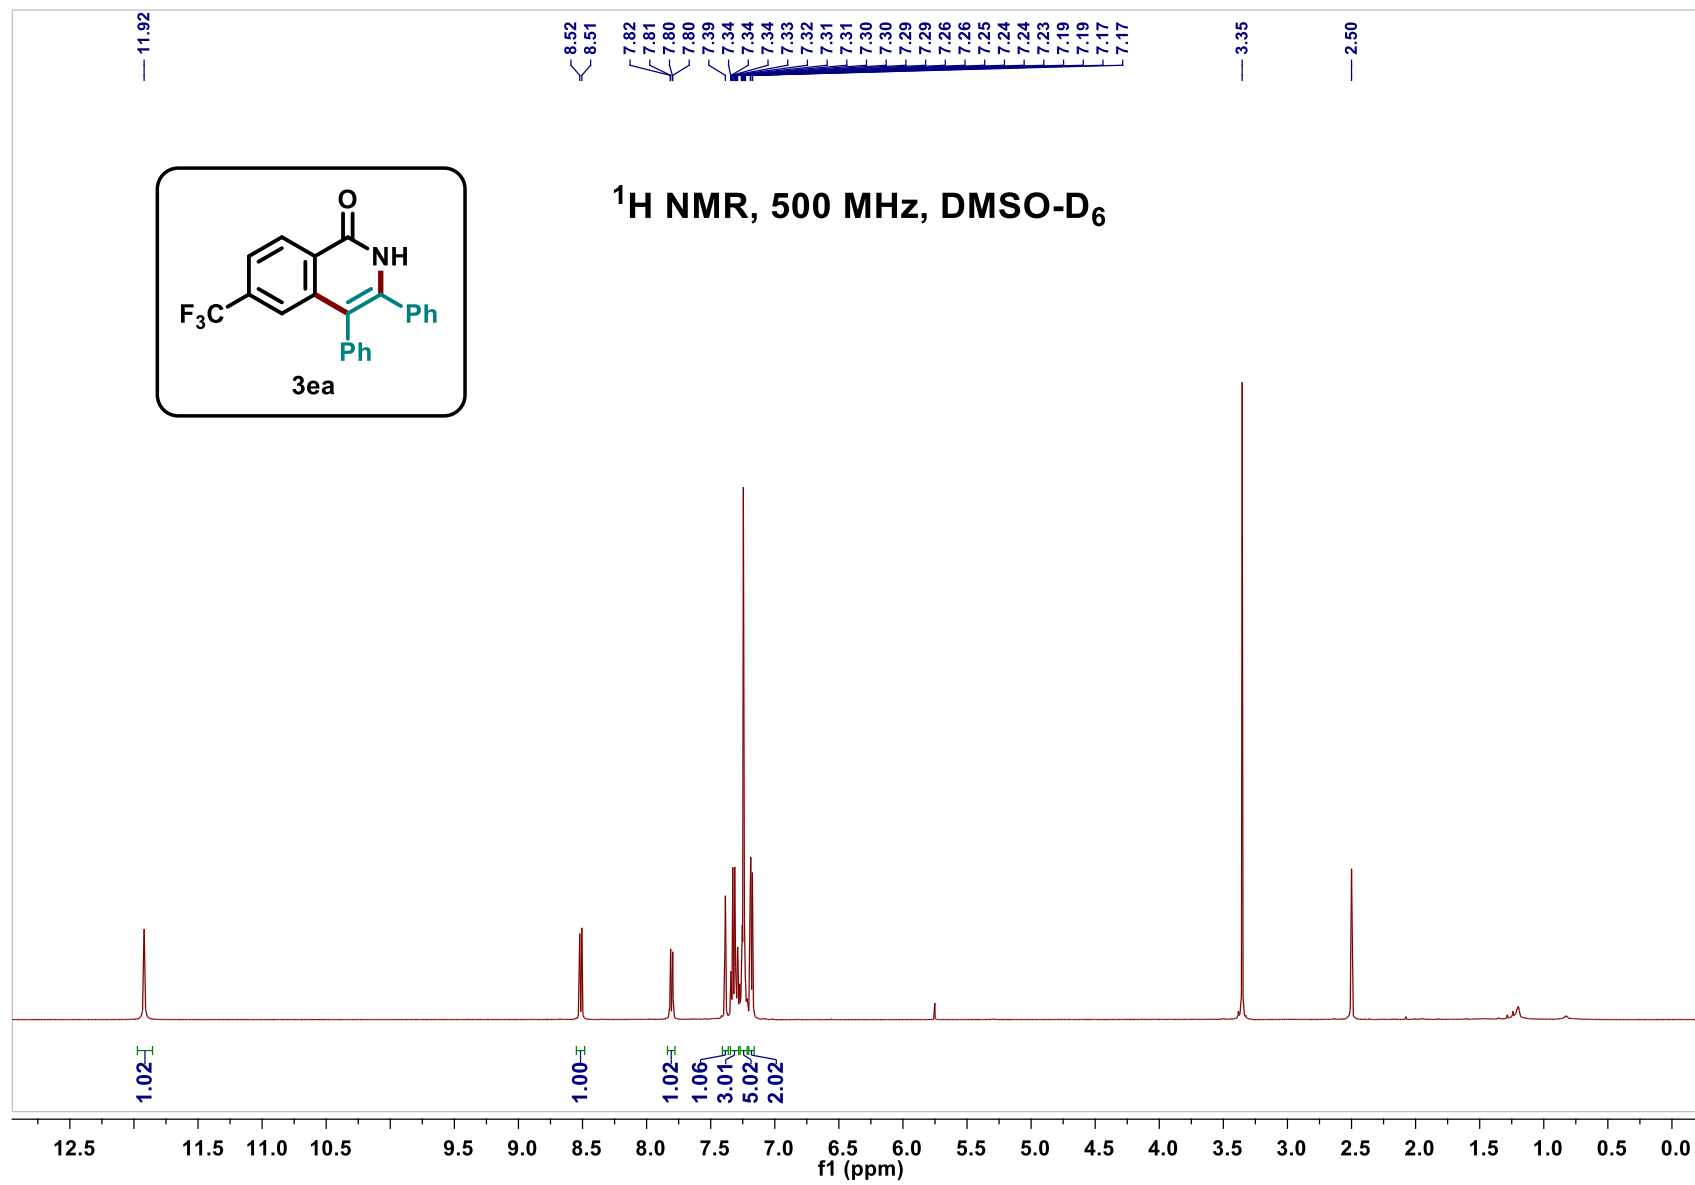

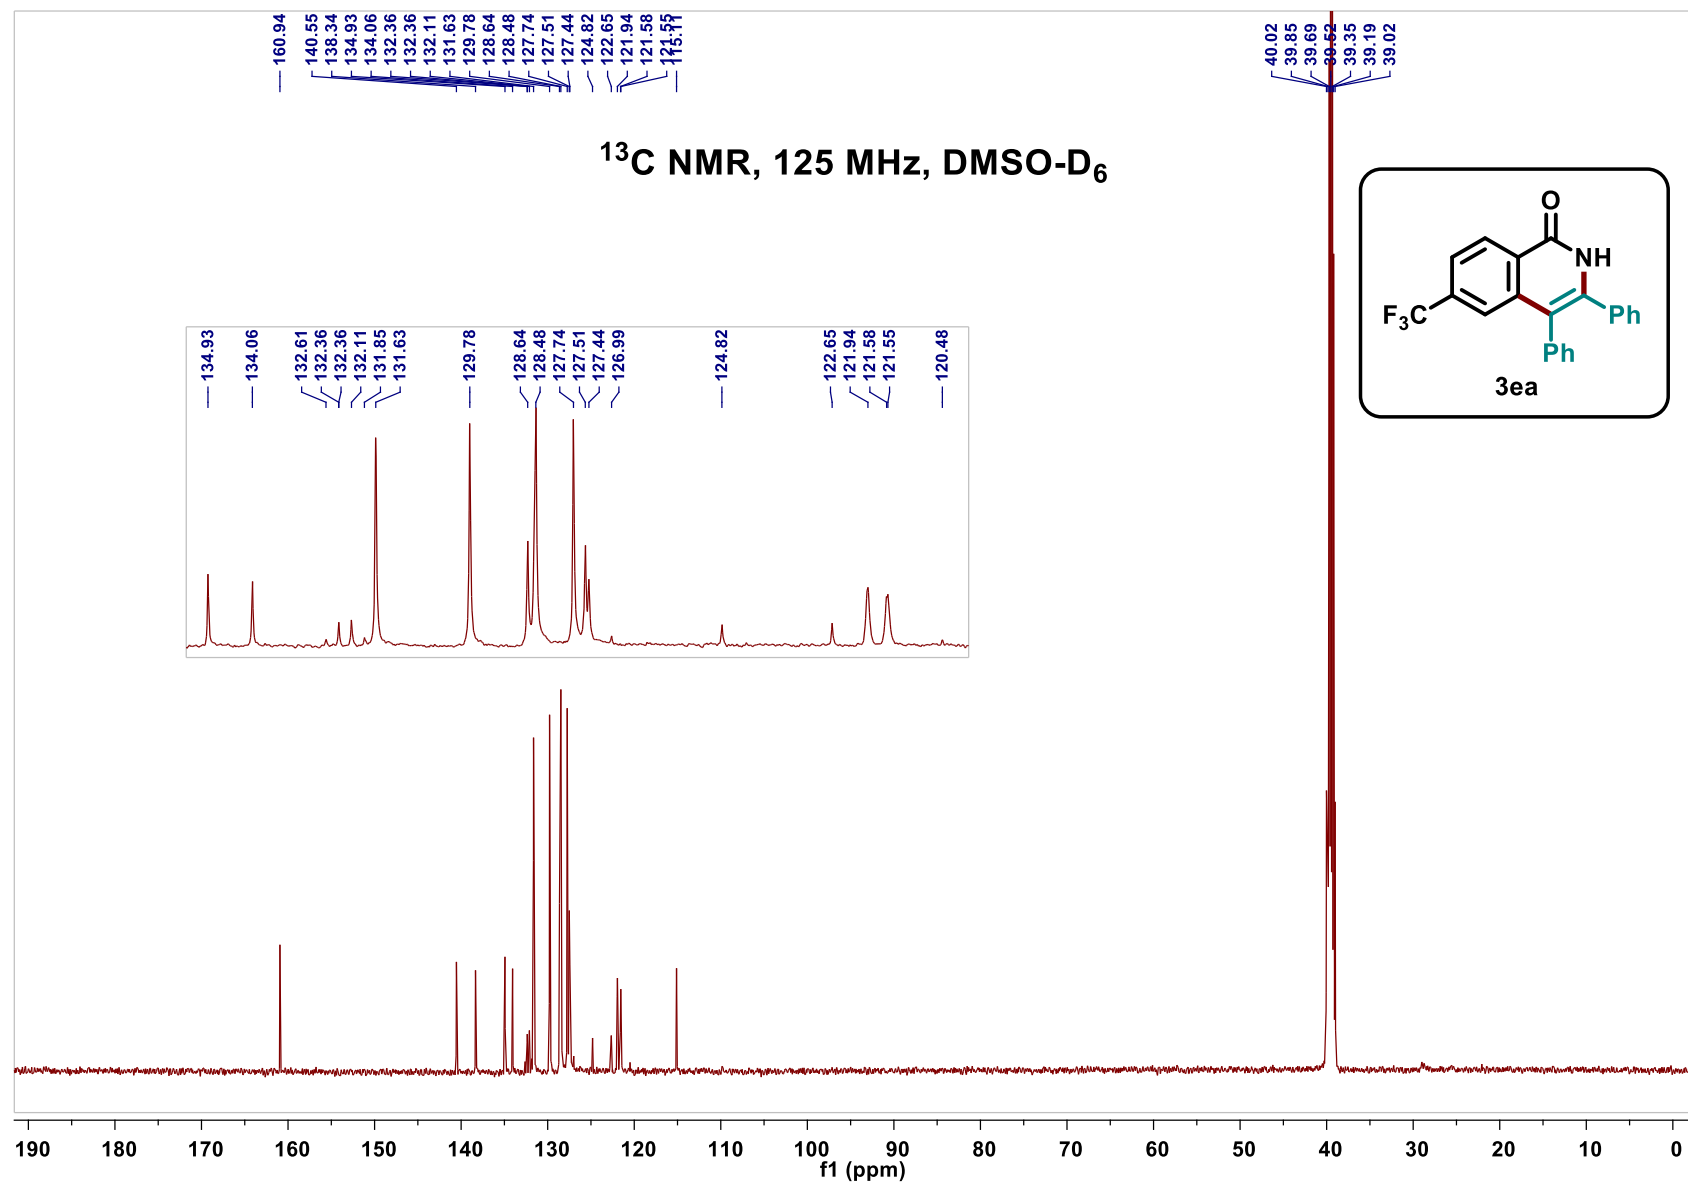

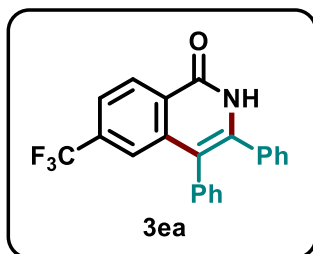

$^{19}\text{F}$  NMR, 470 MHz, DMSO- $\text{D}_6$

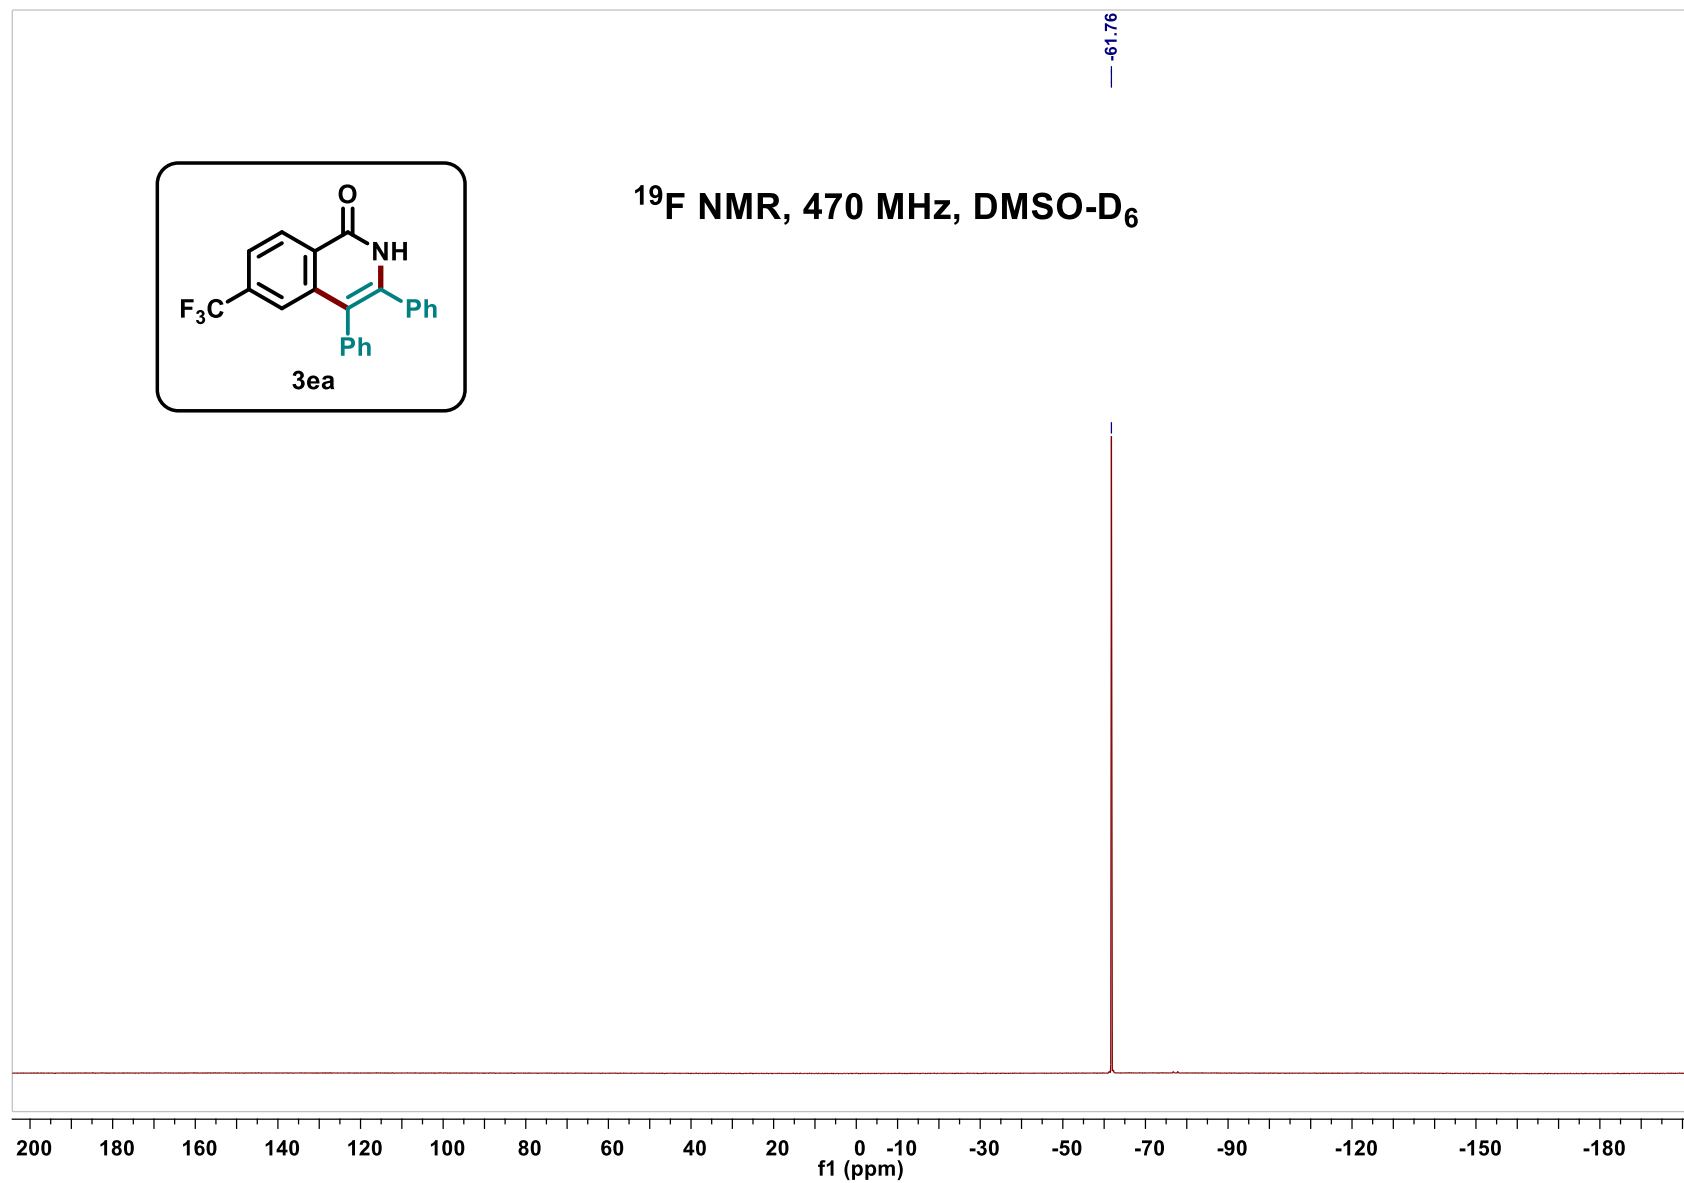

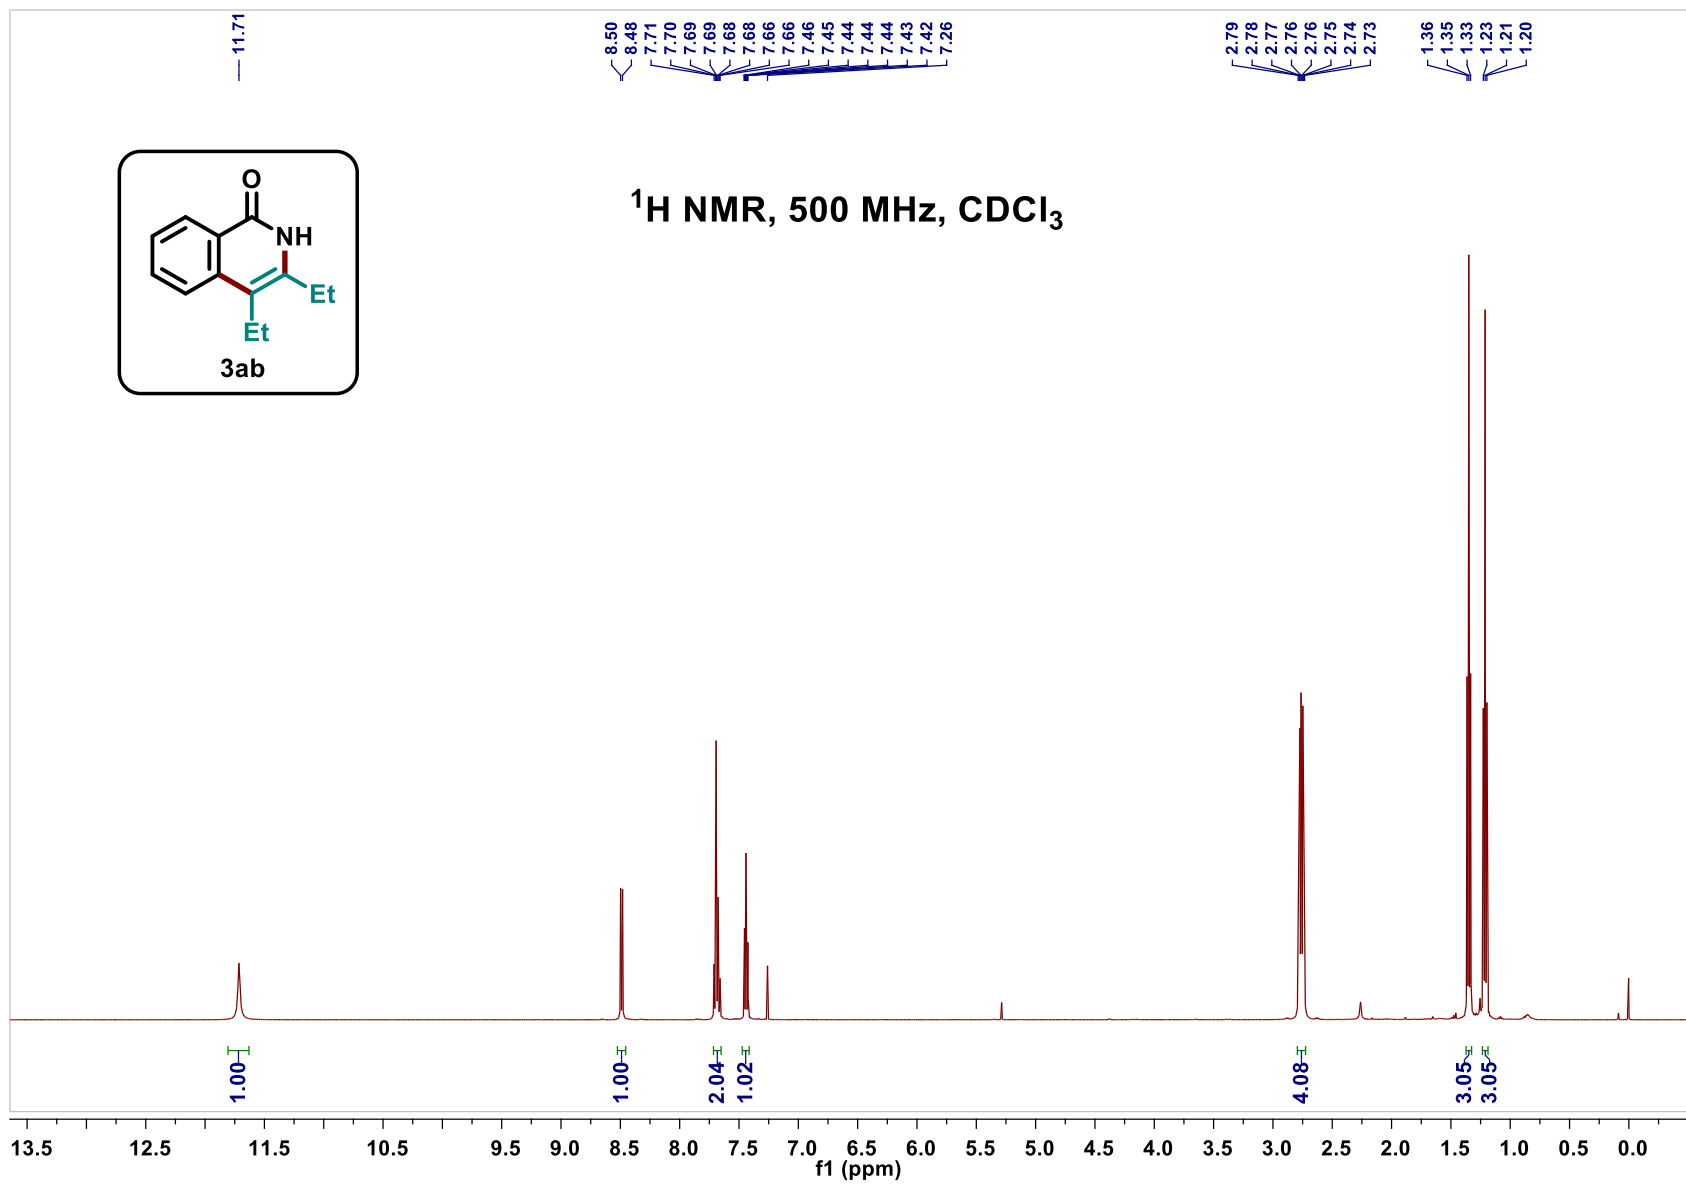

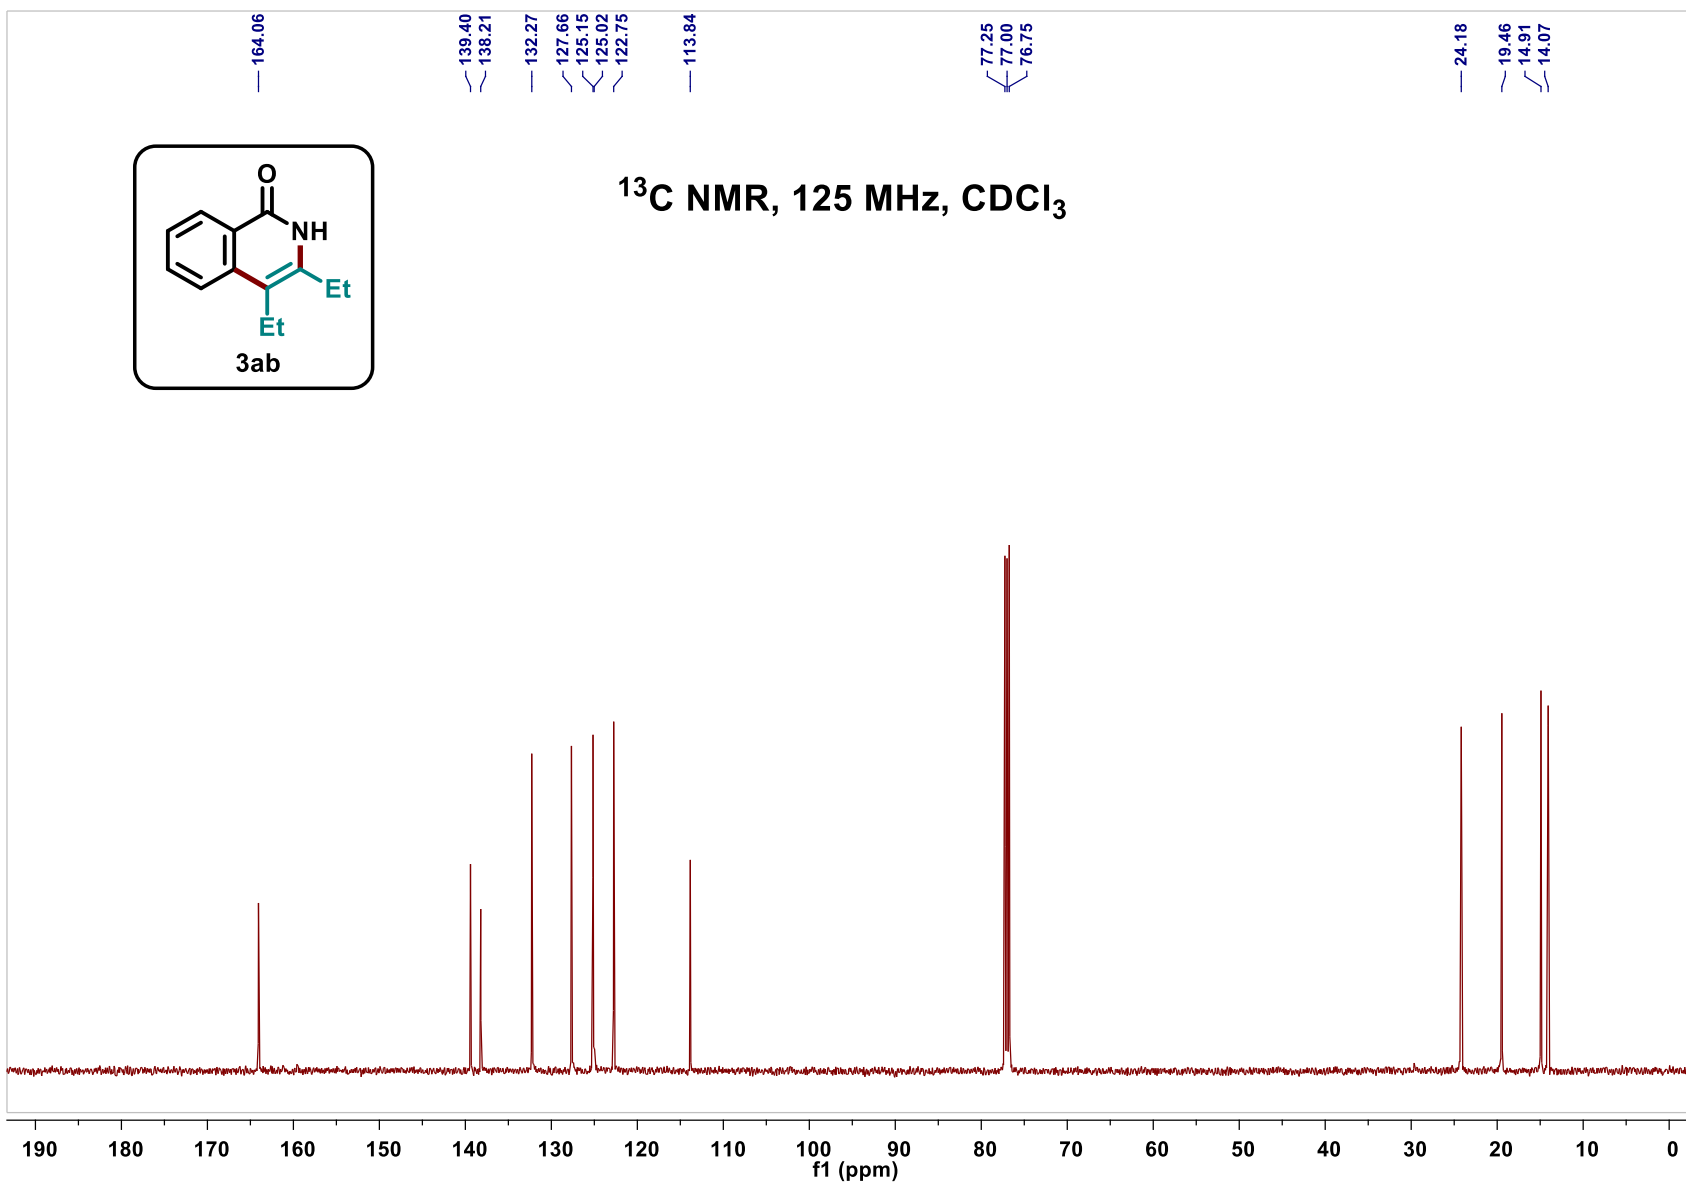

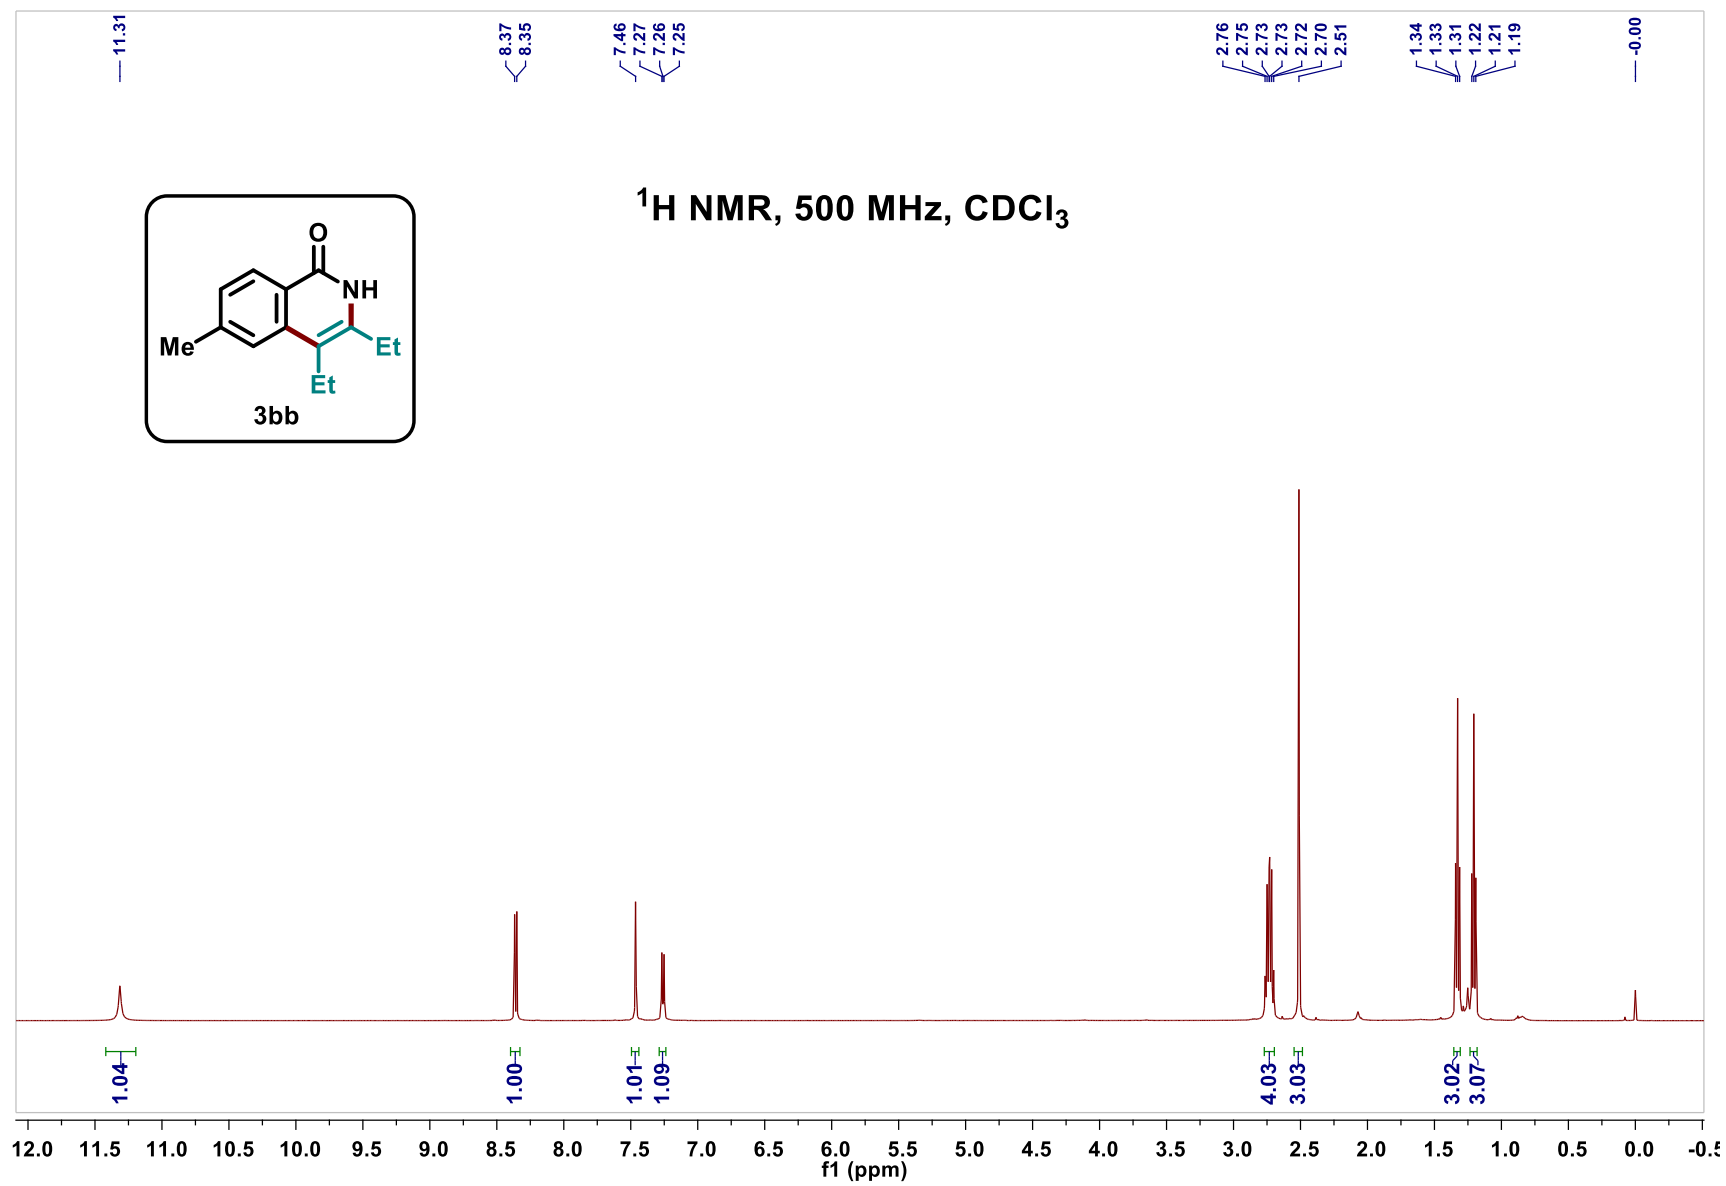



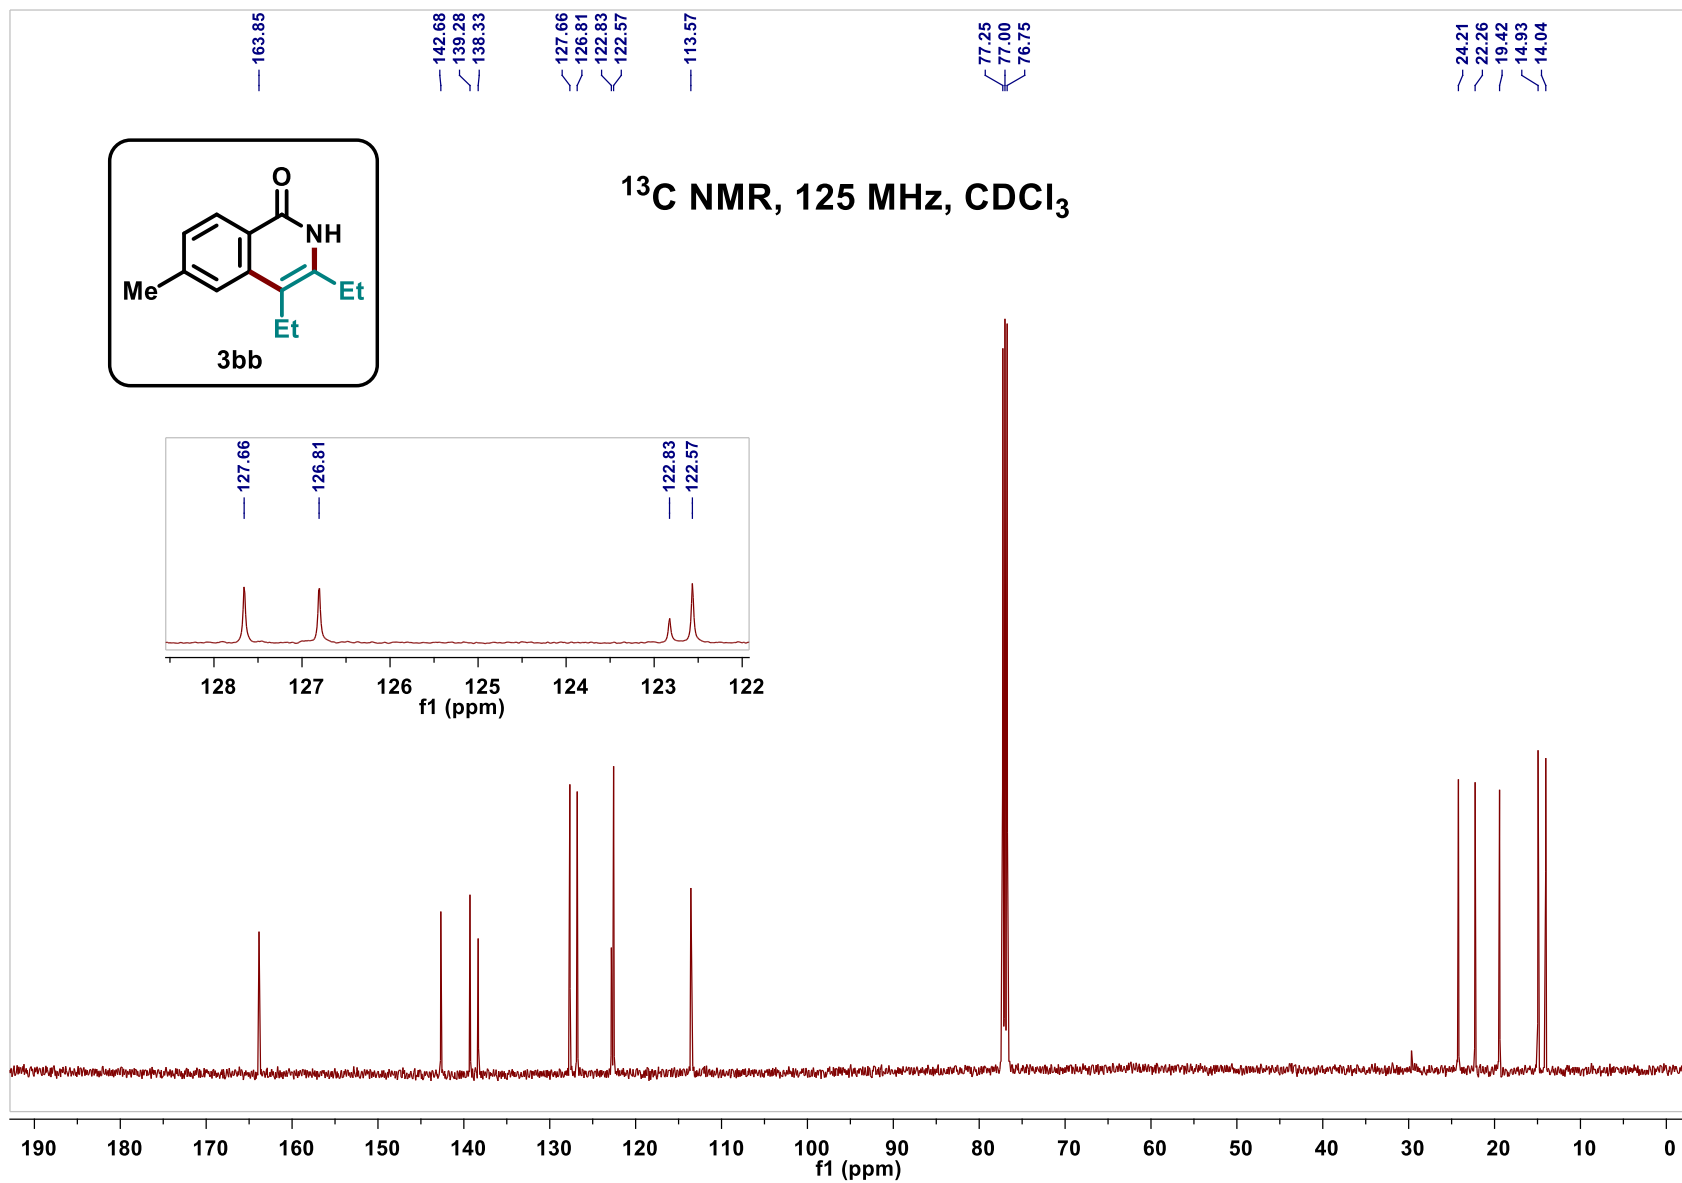

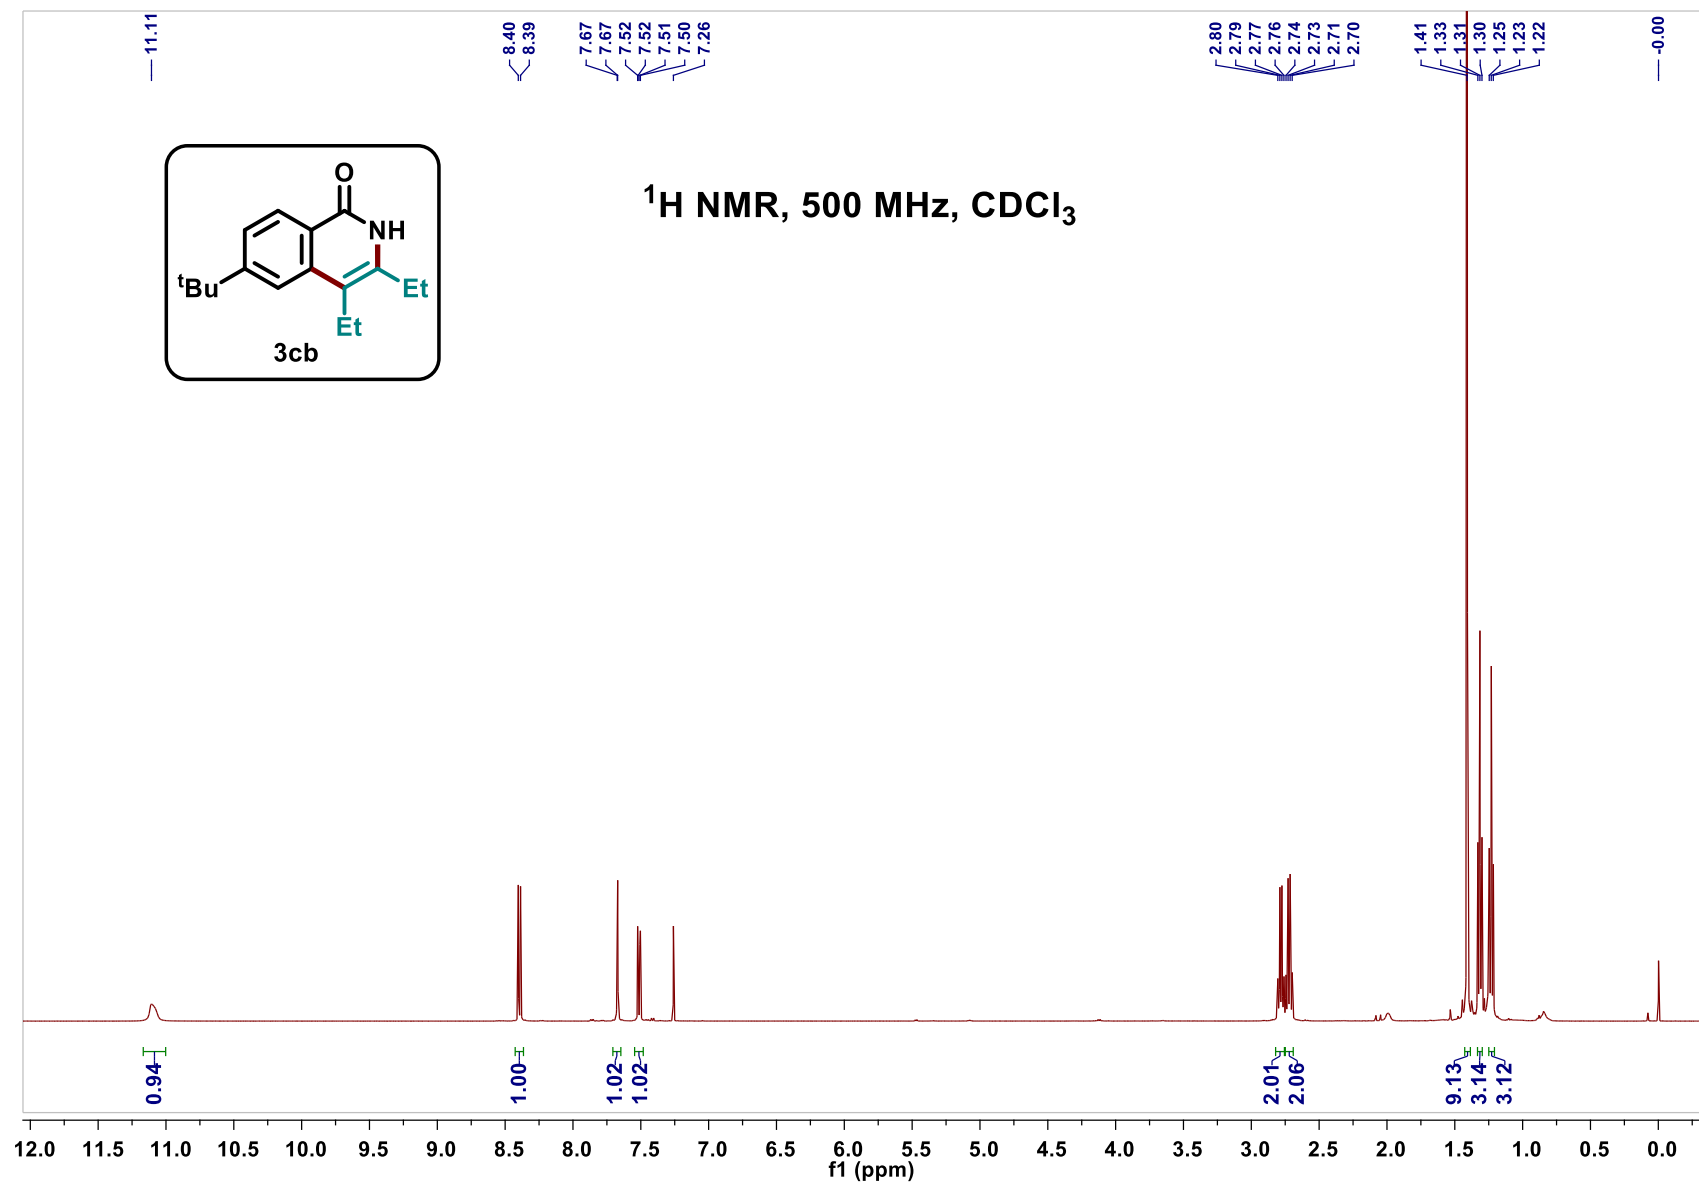

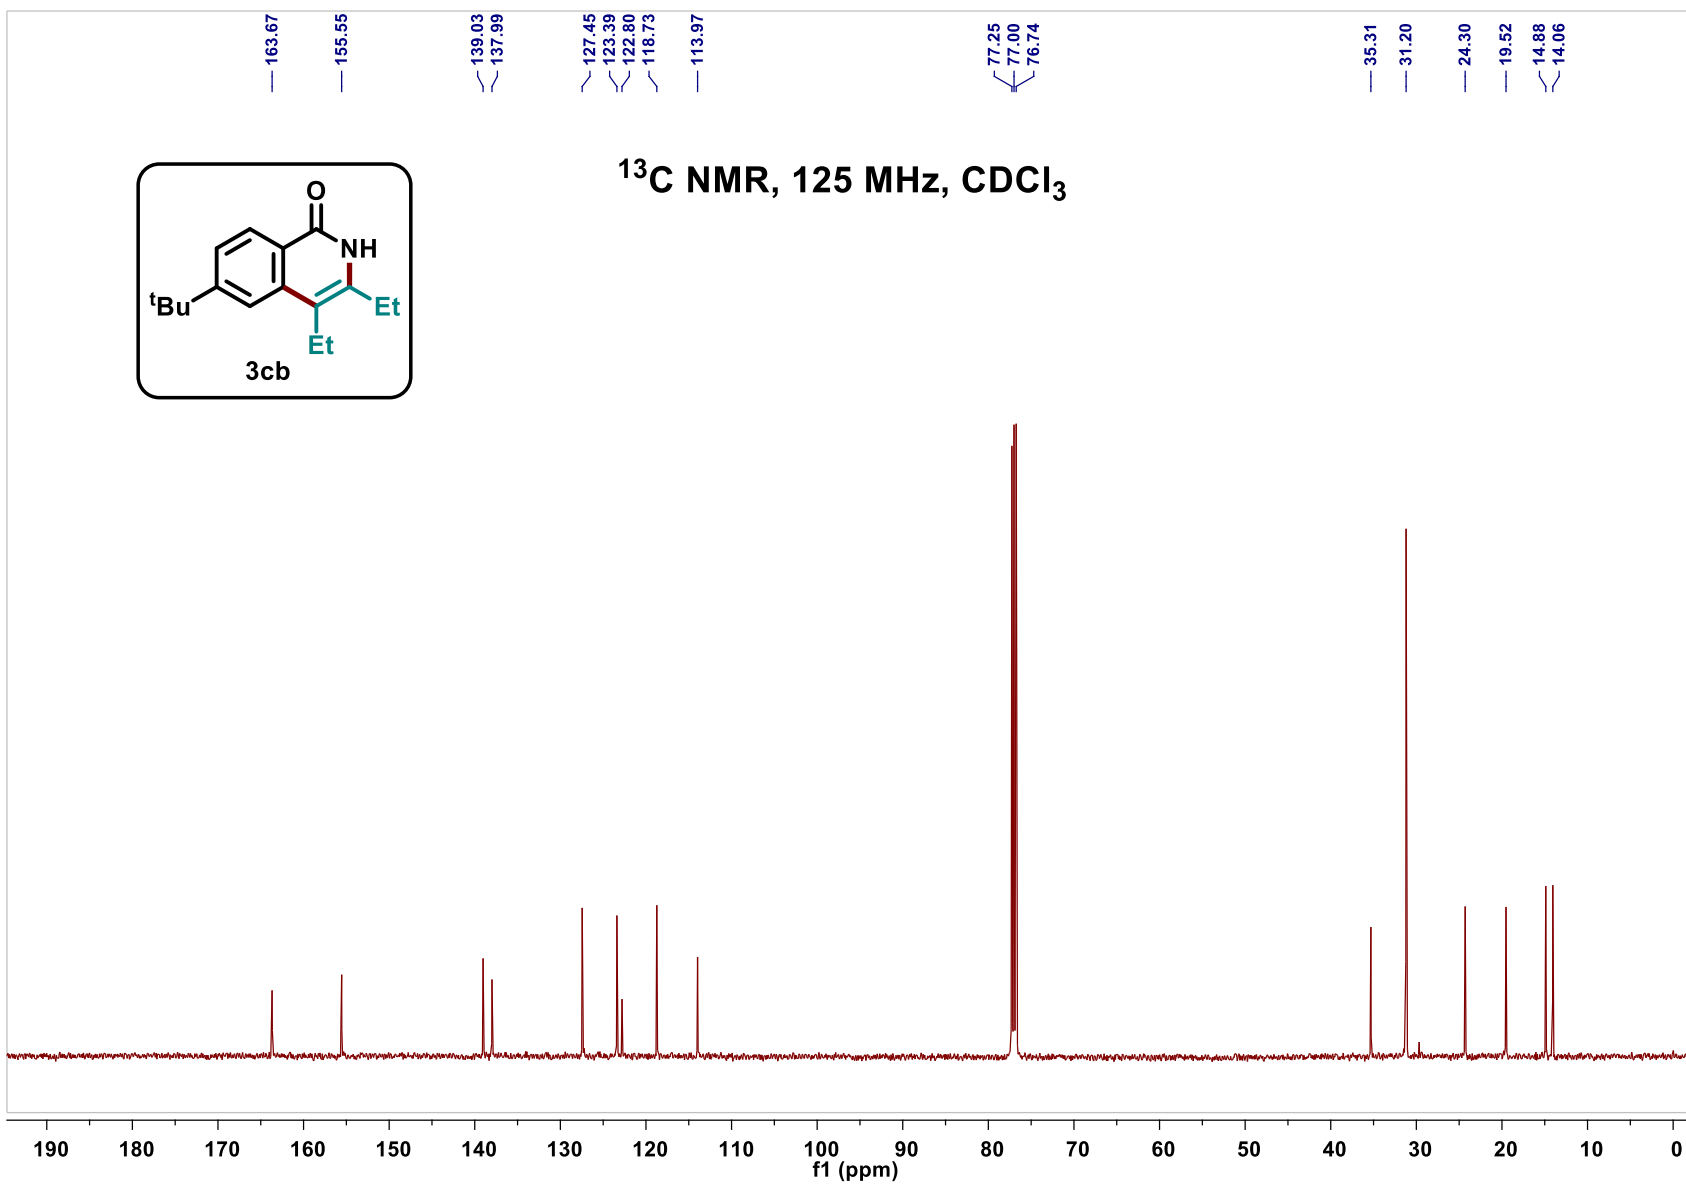

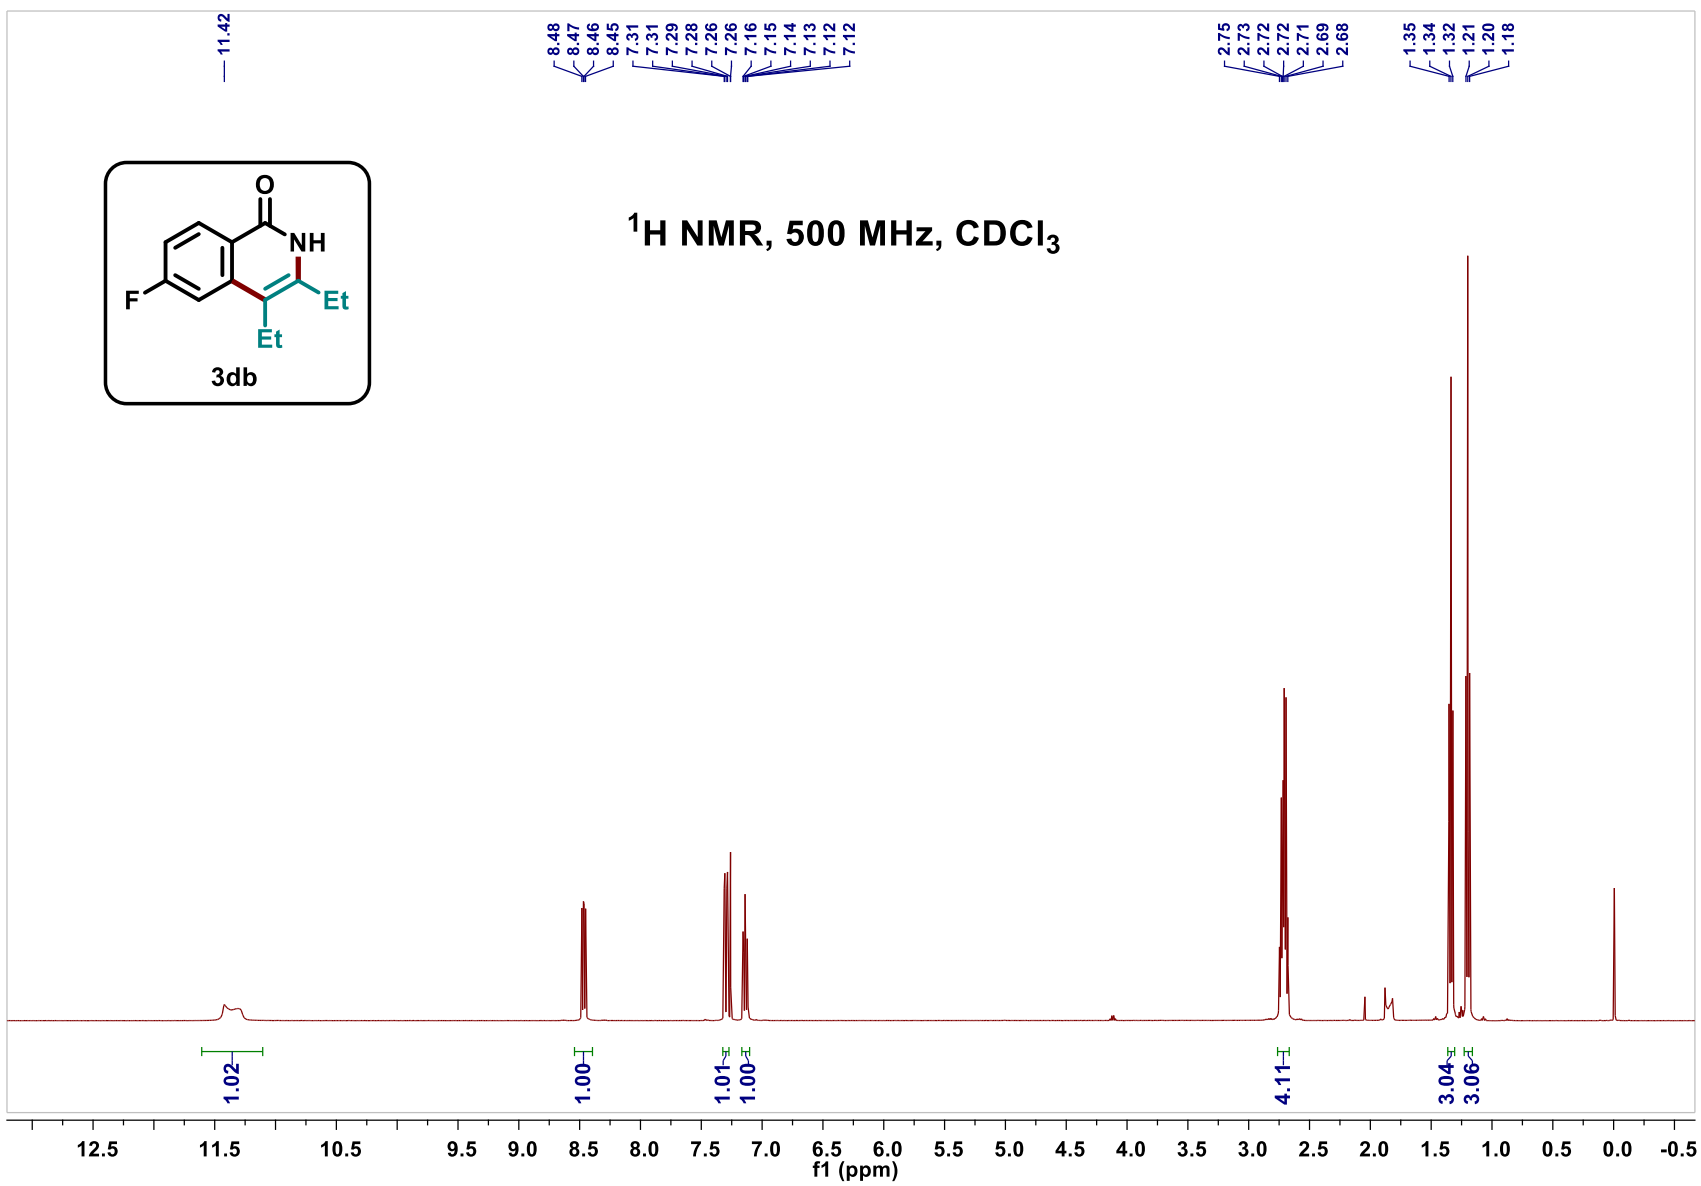

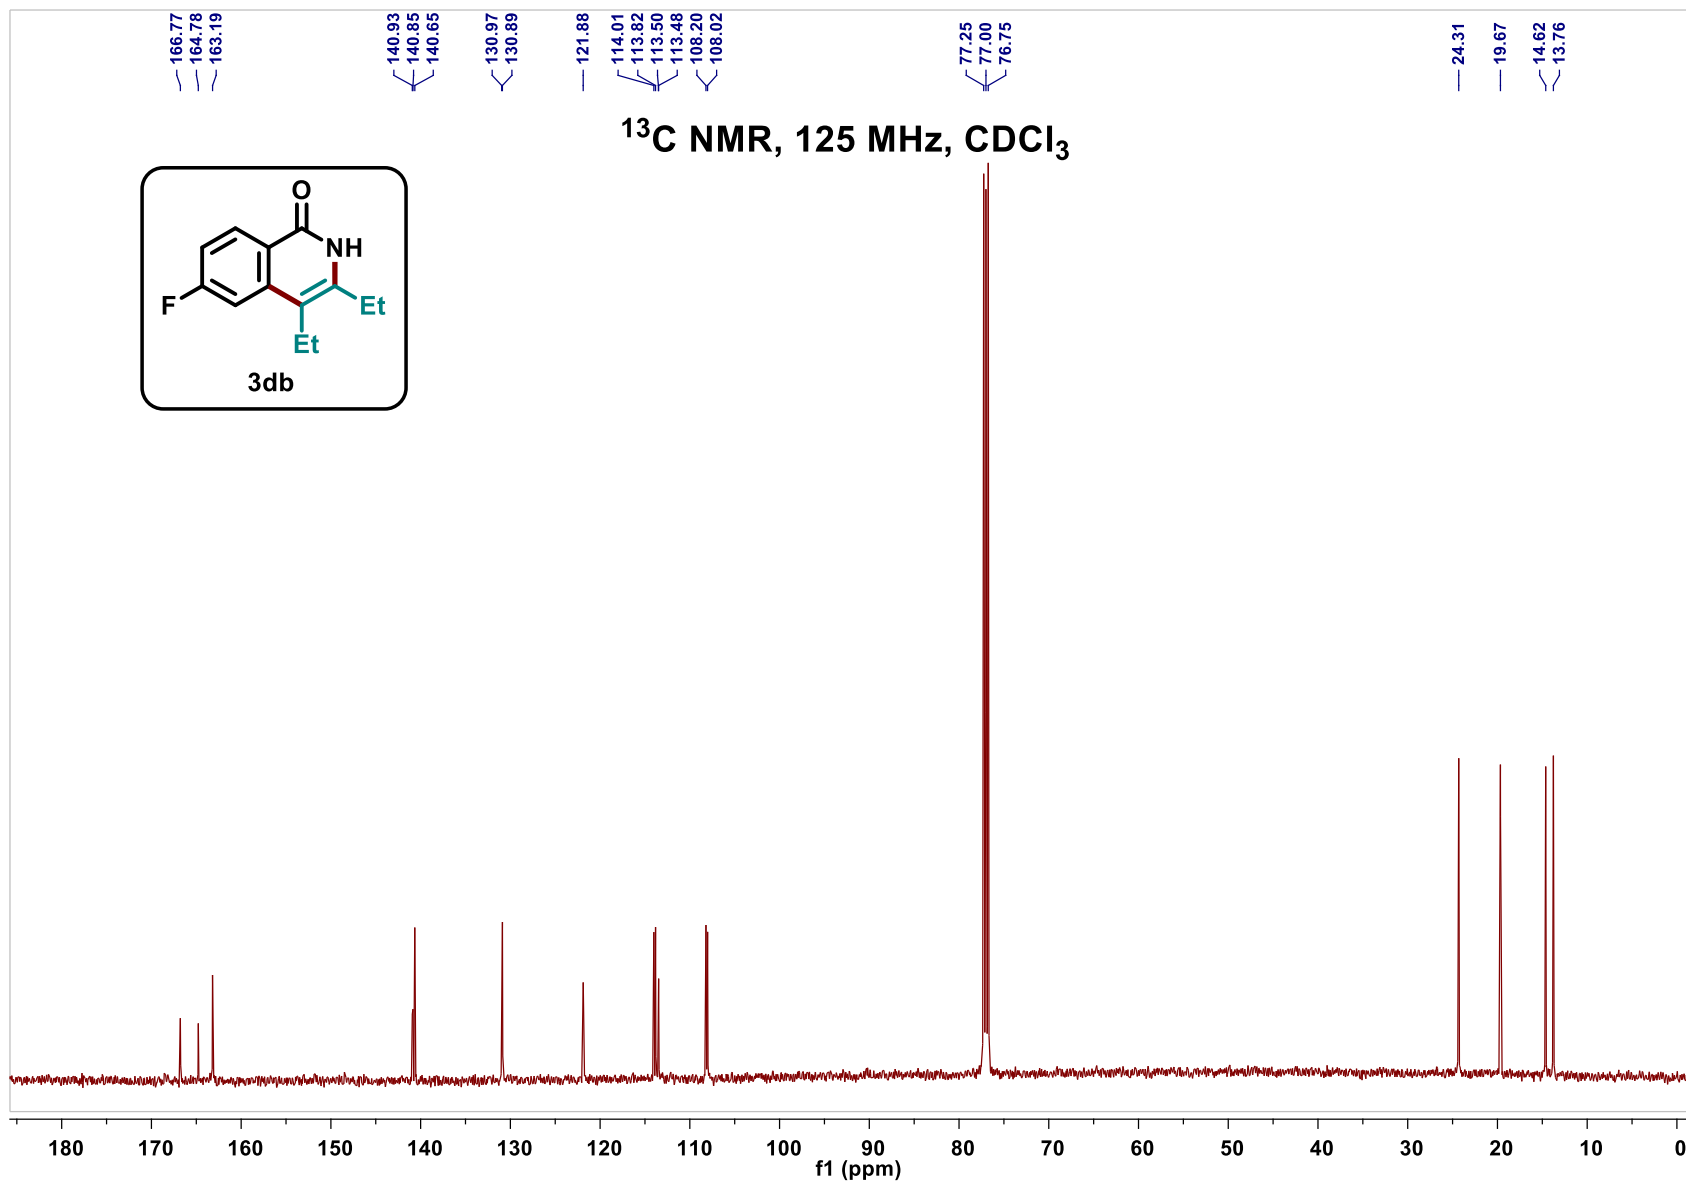

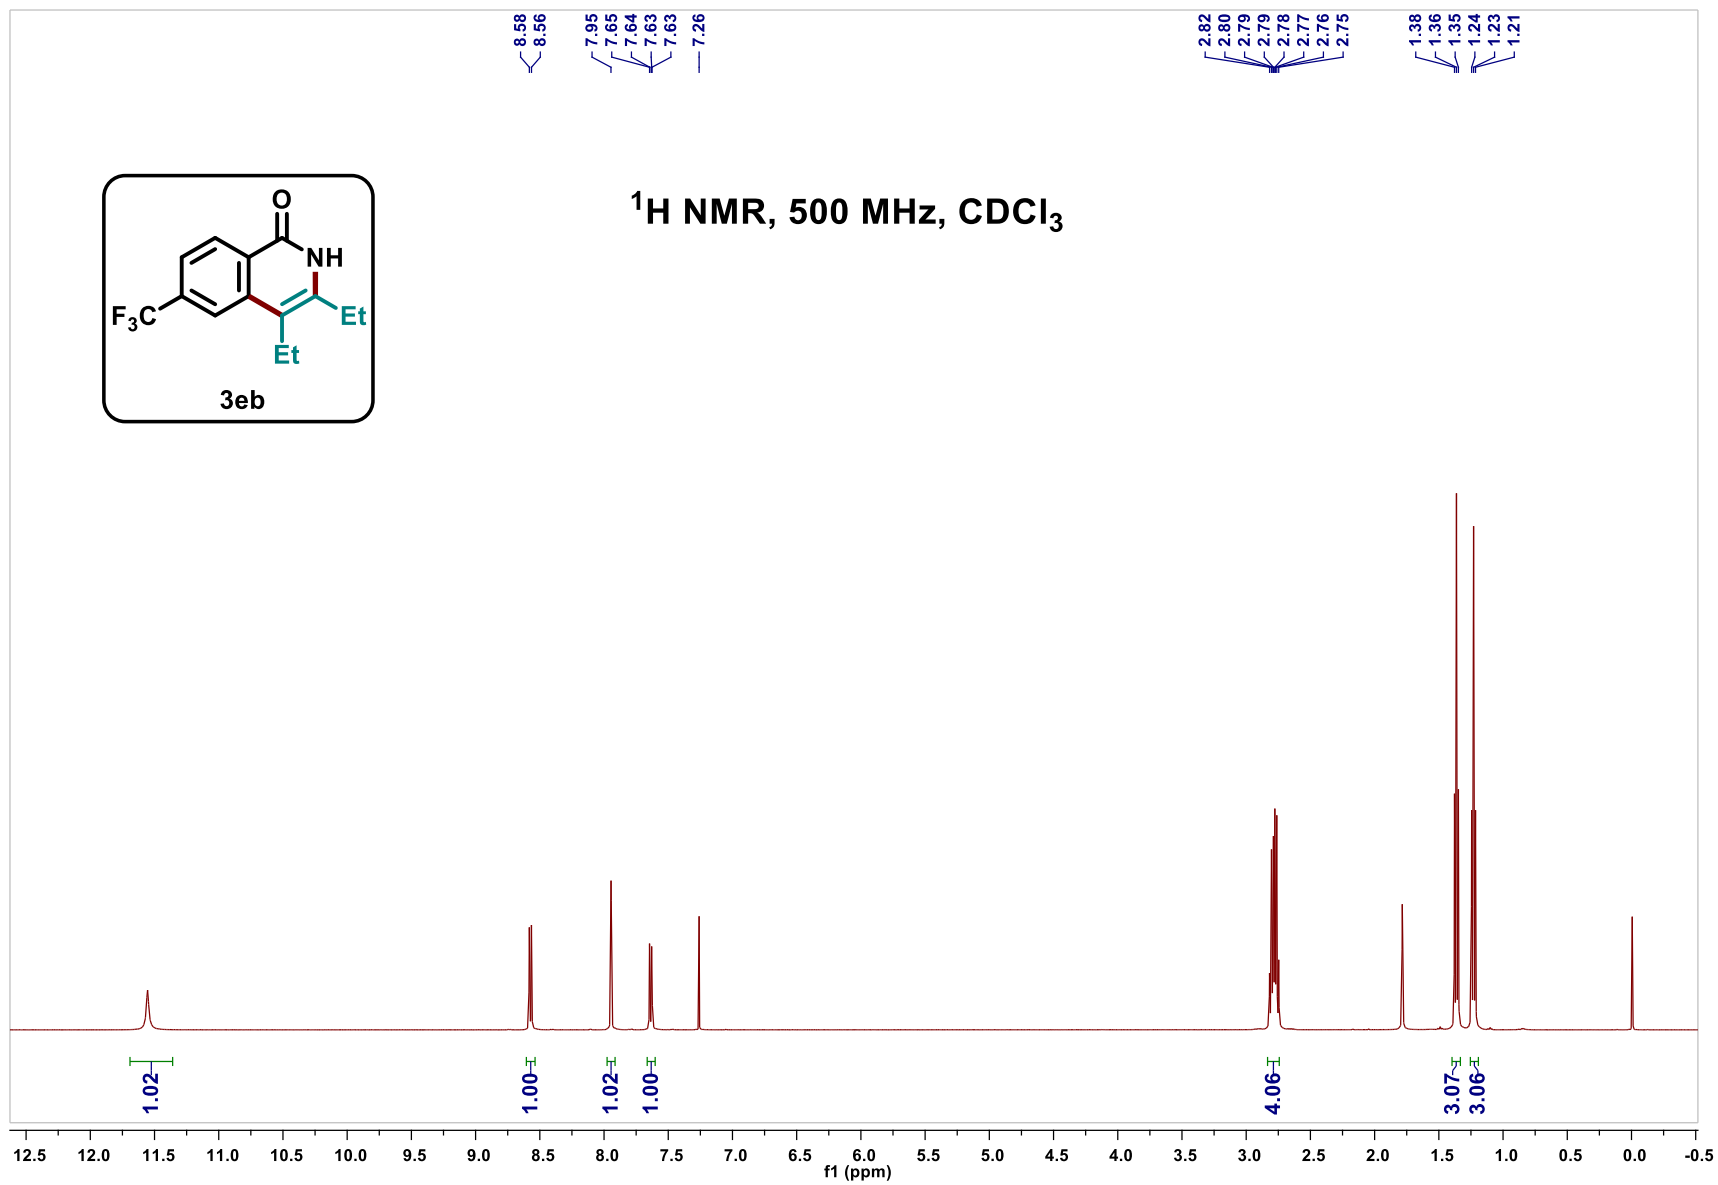

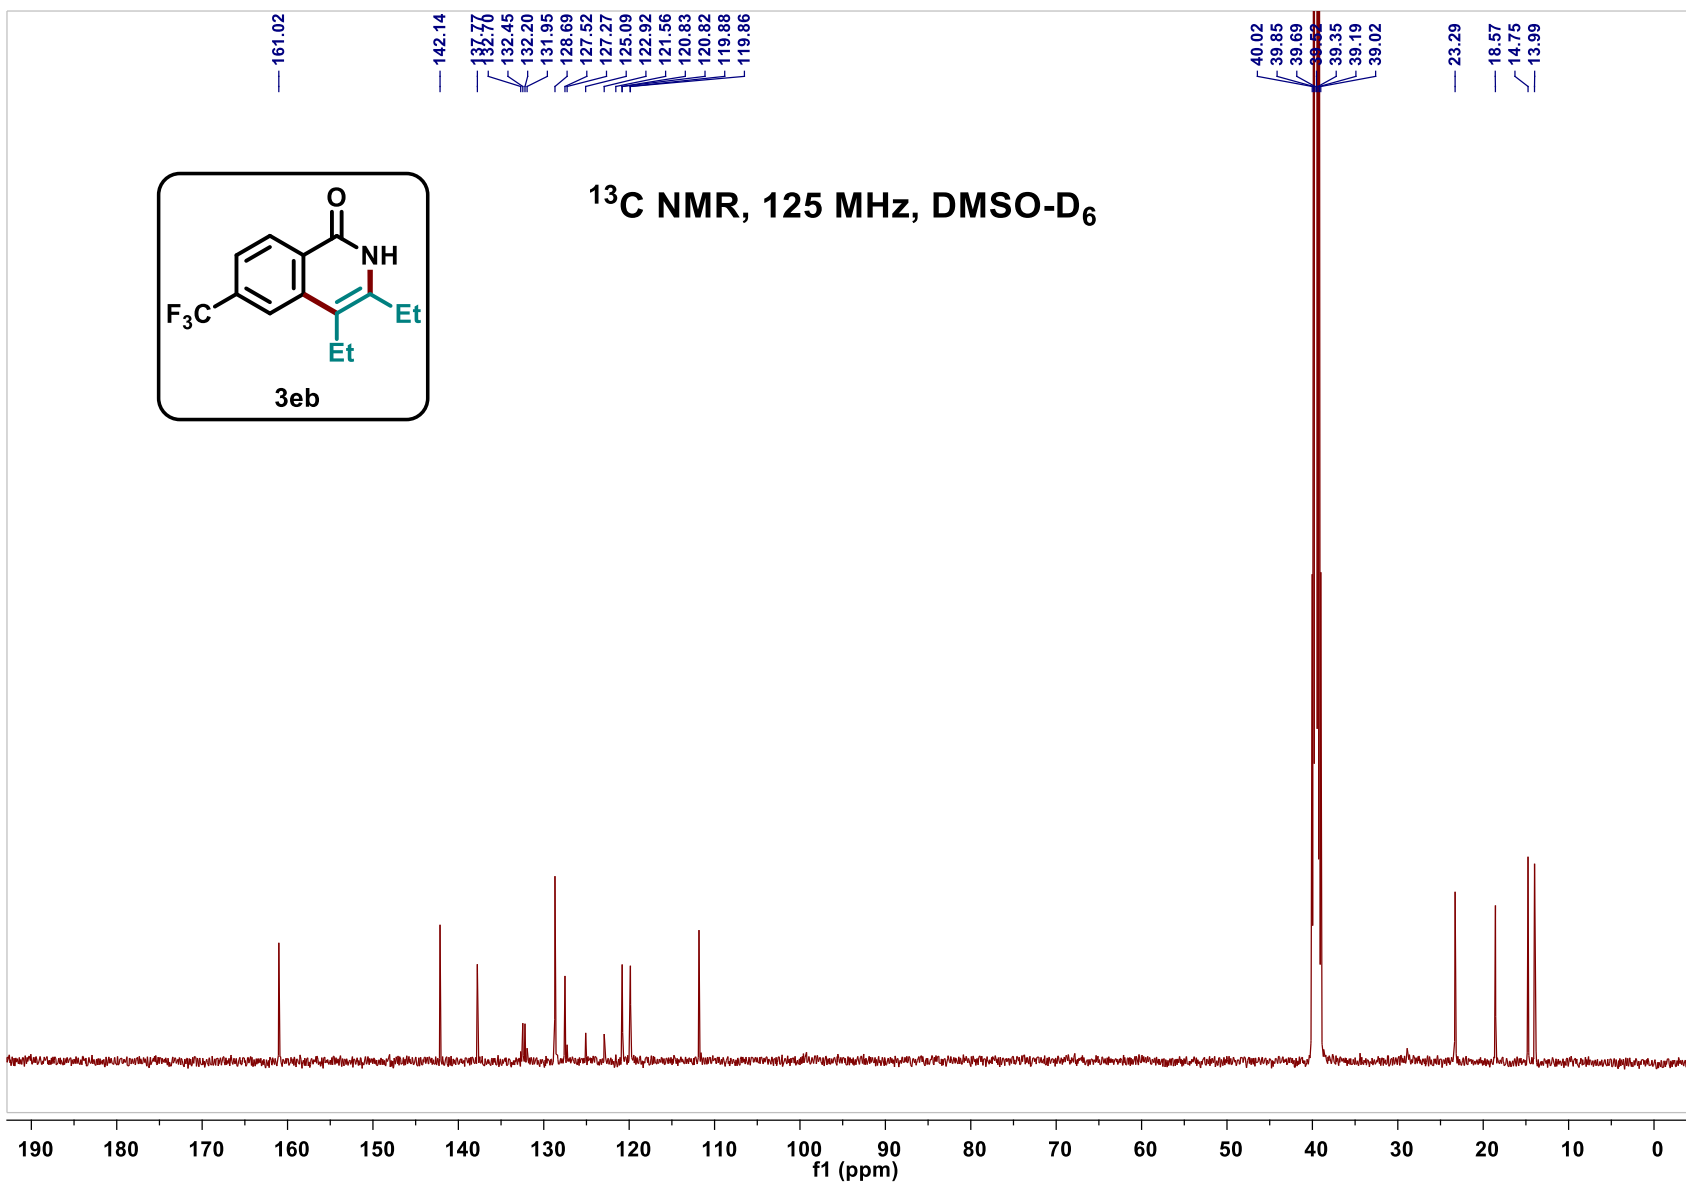

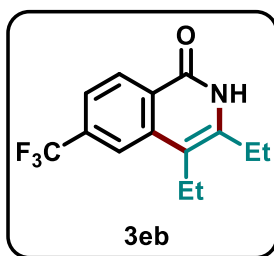

$^{19}\text{F}$  NMR, 470 MHz,  $\text{CDCl}_3$

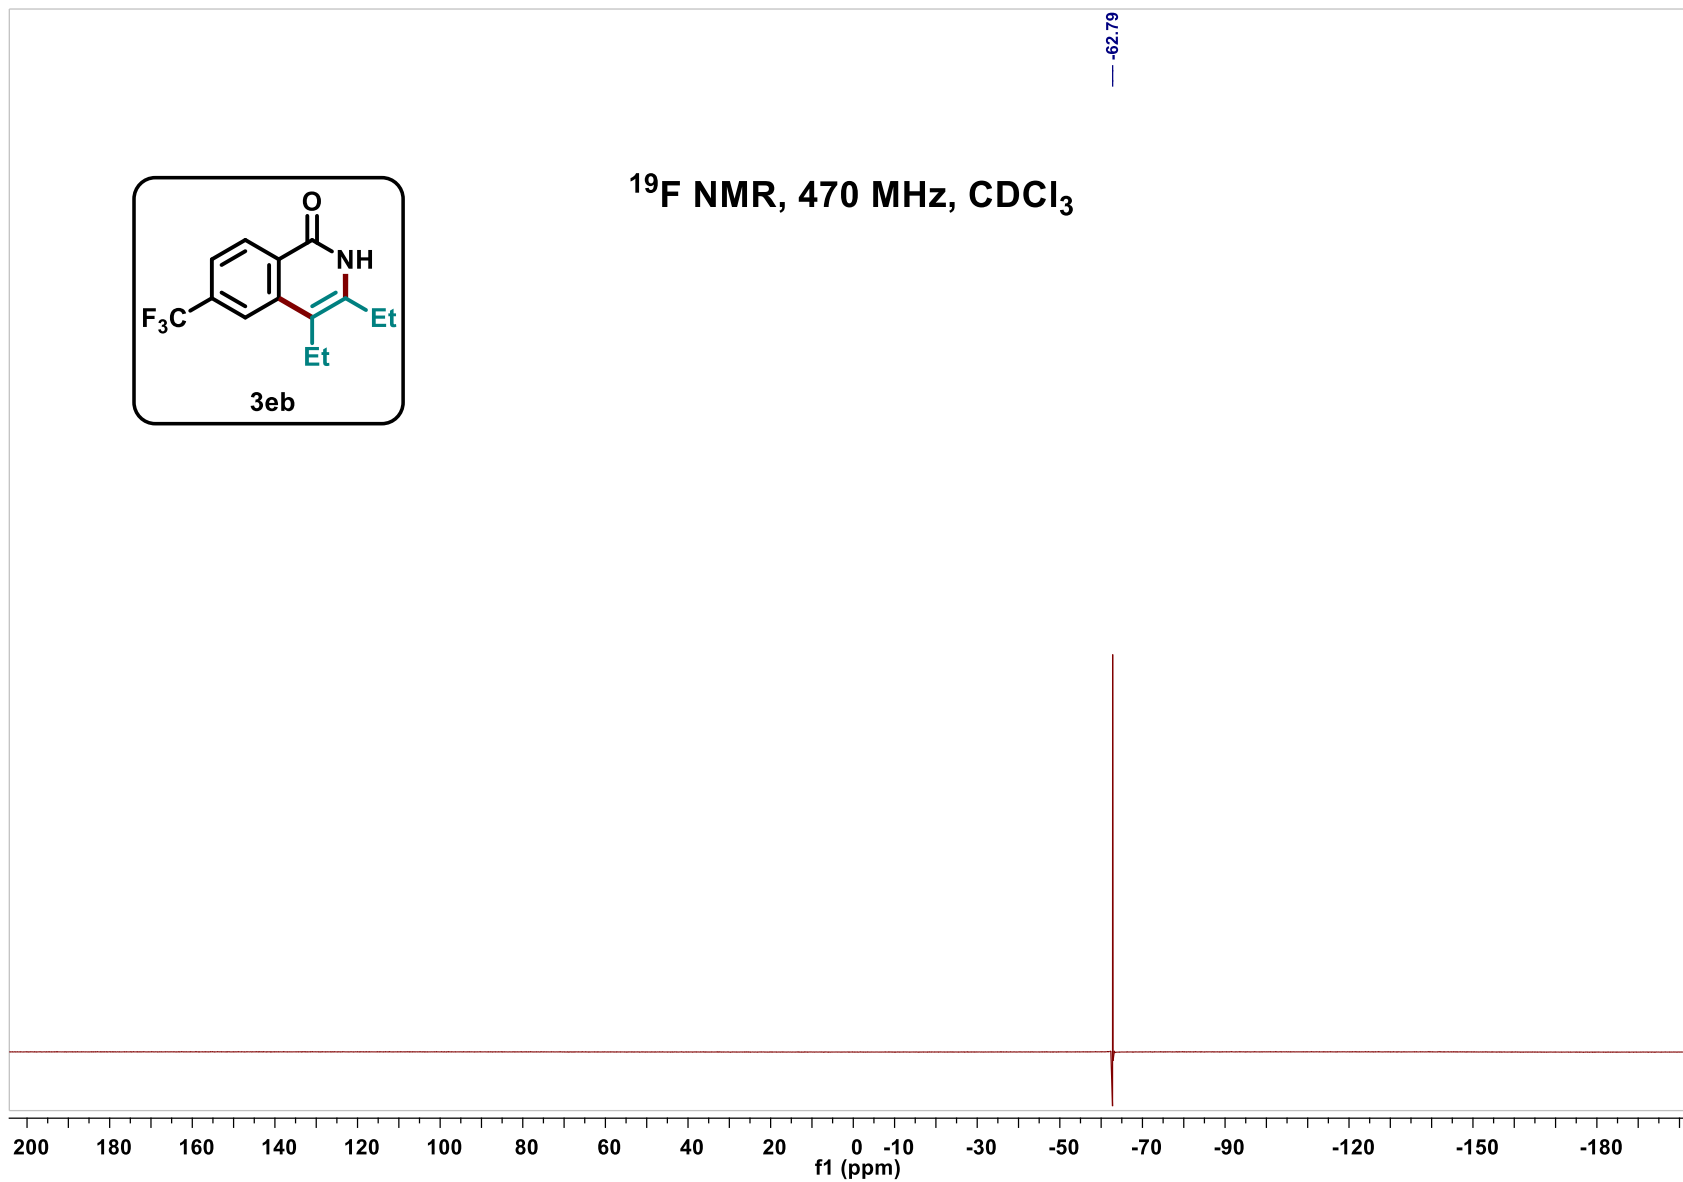



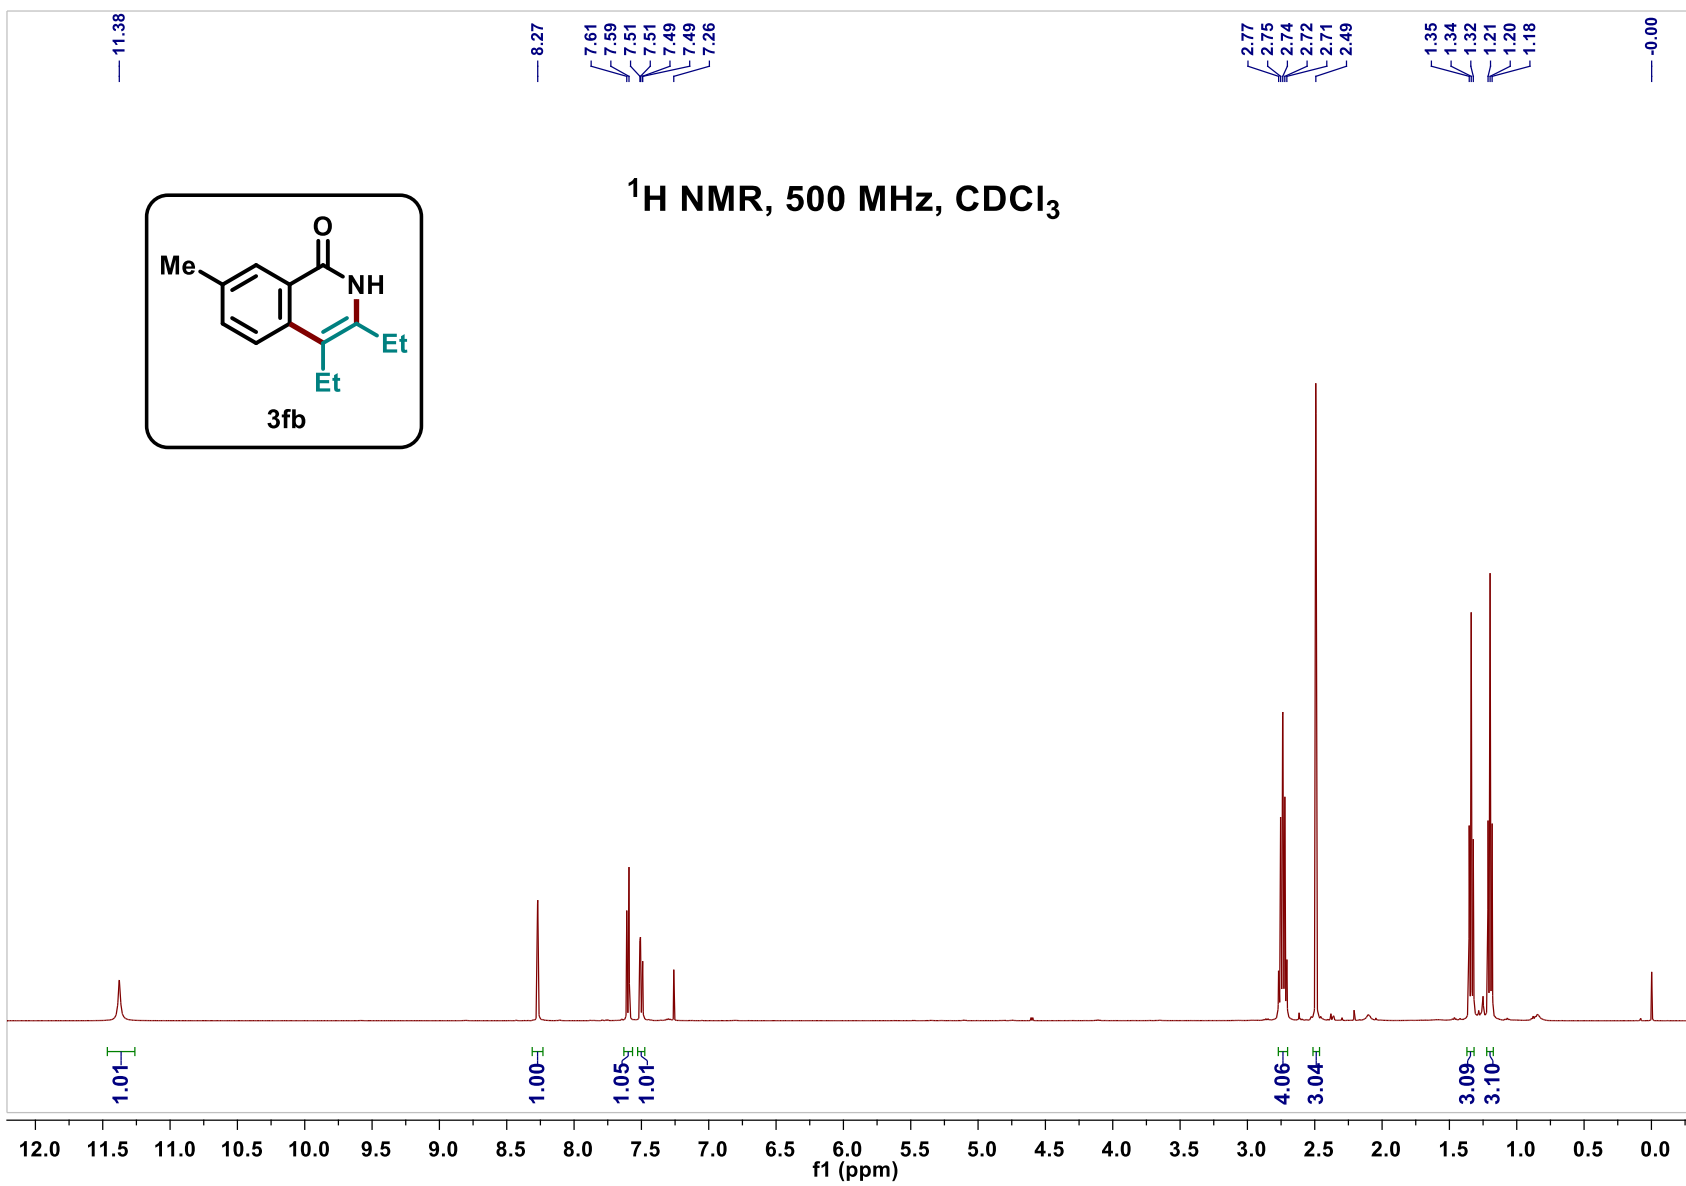

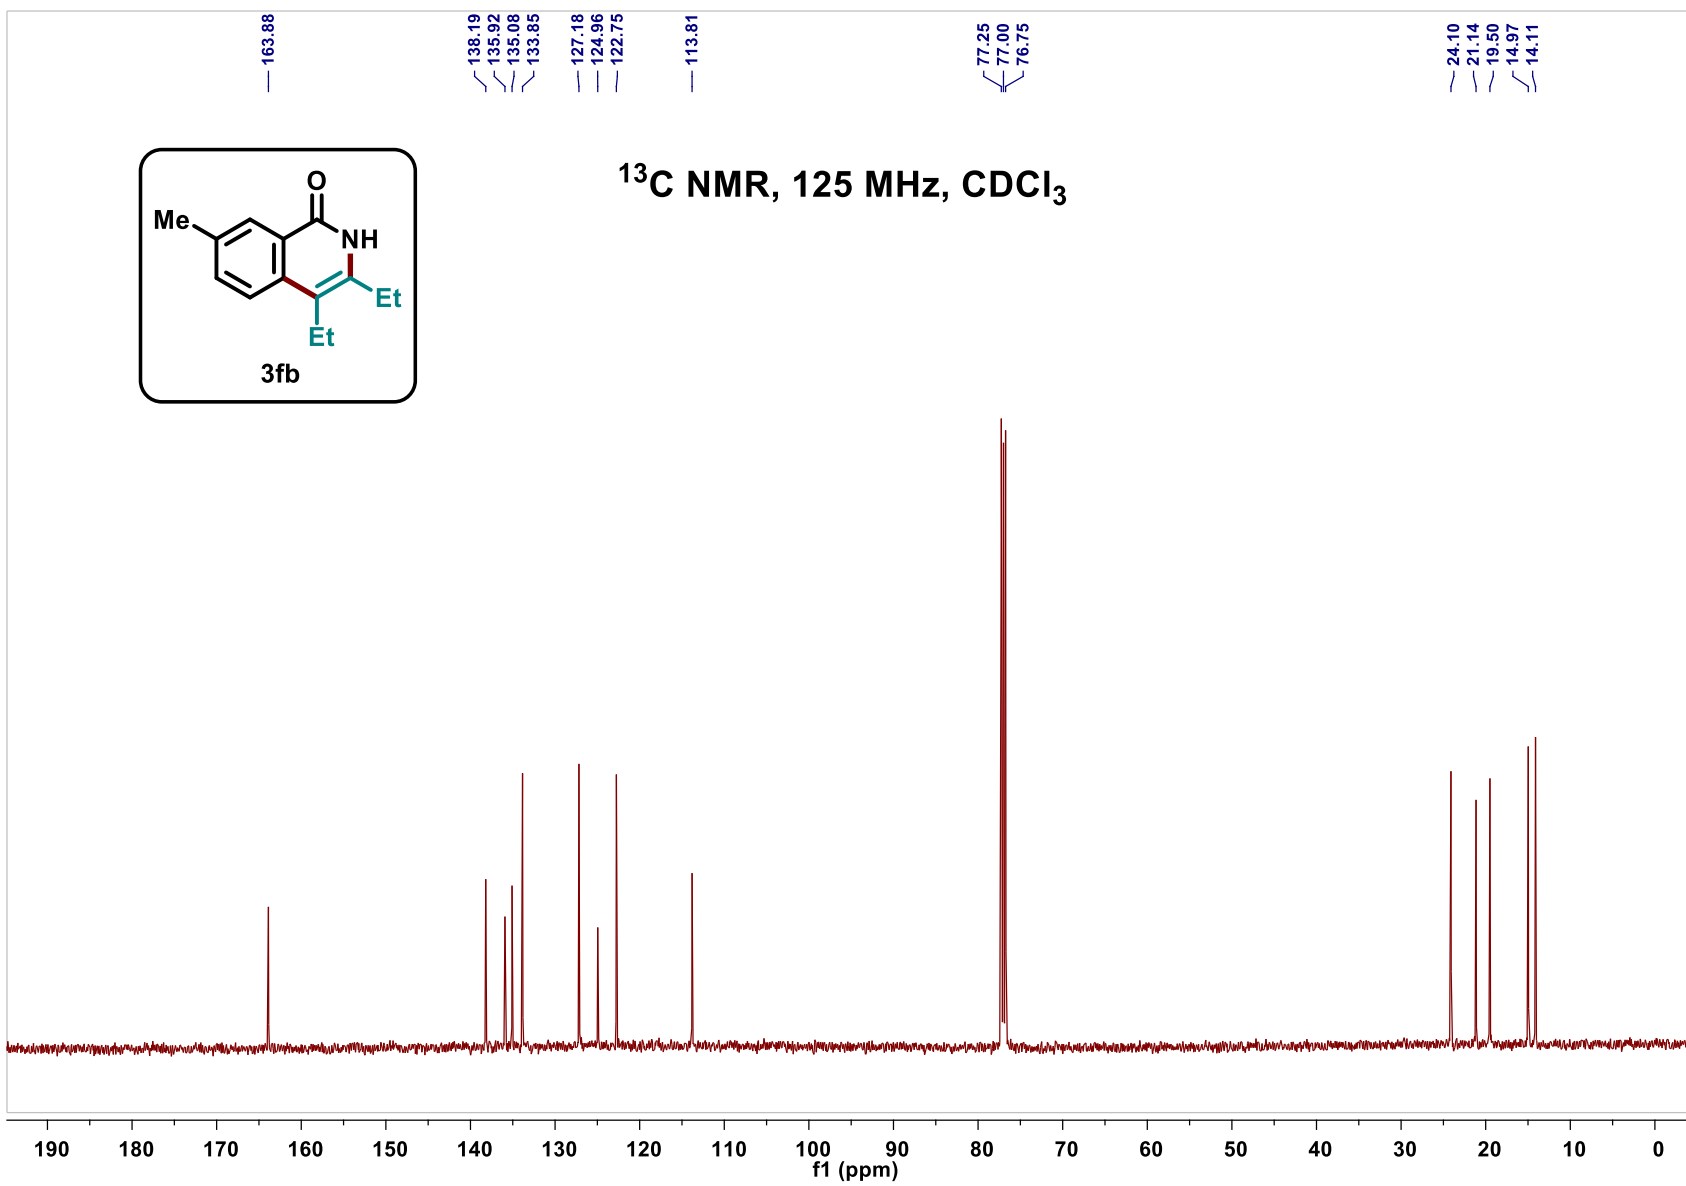

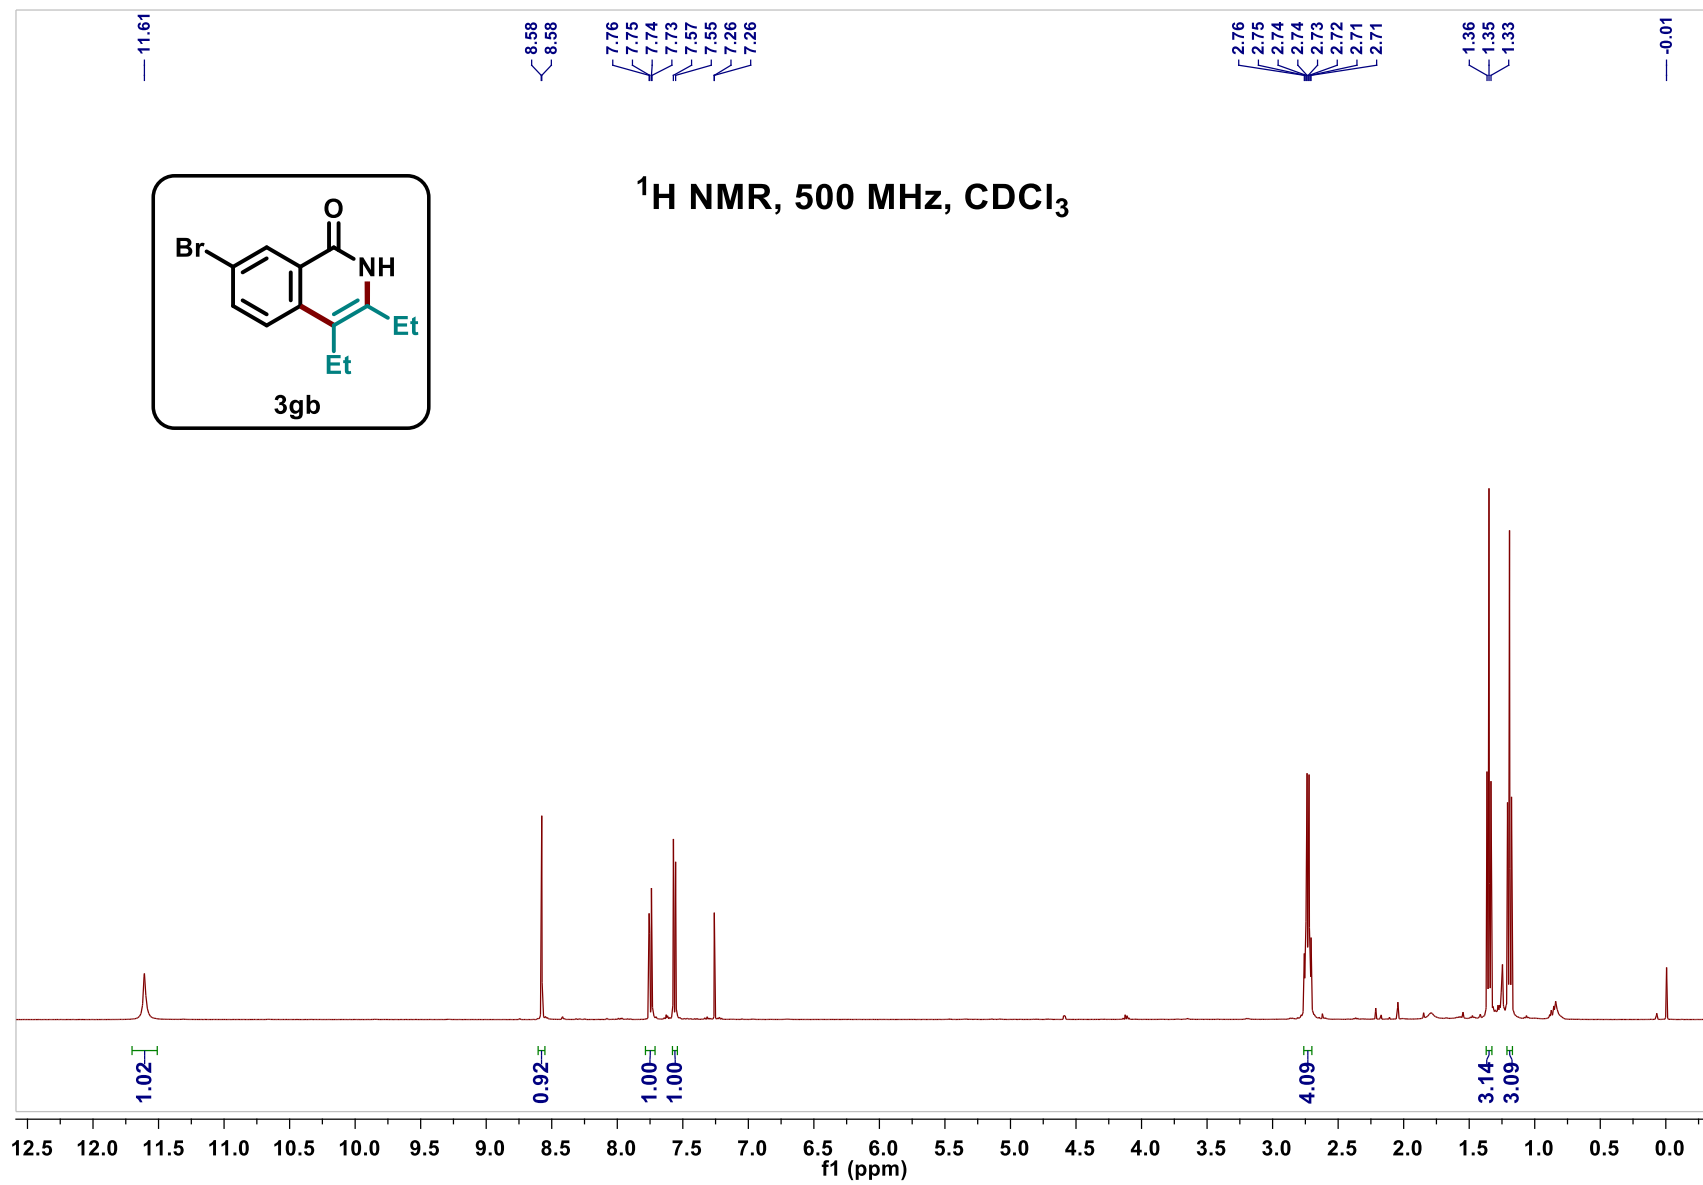

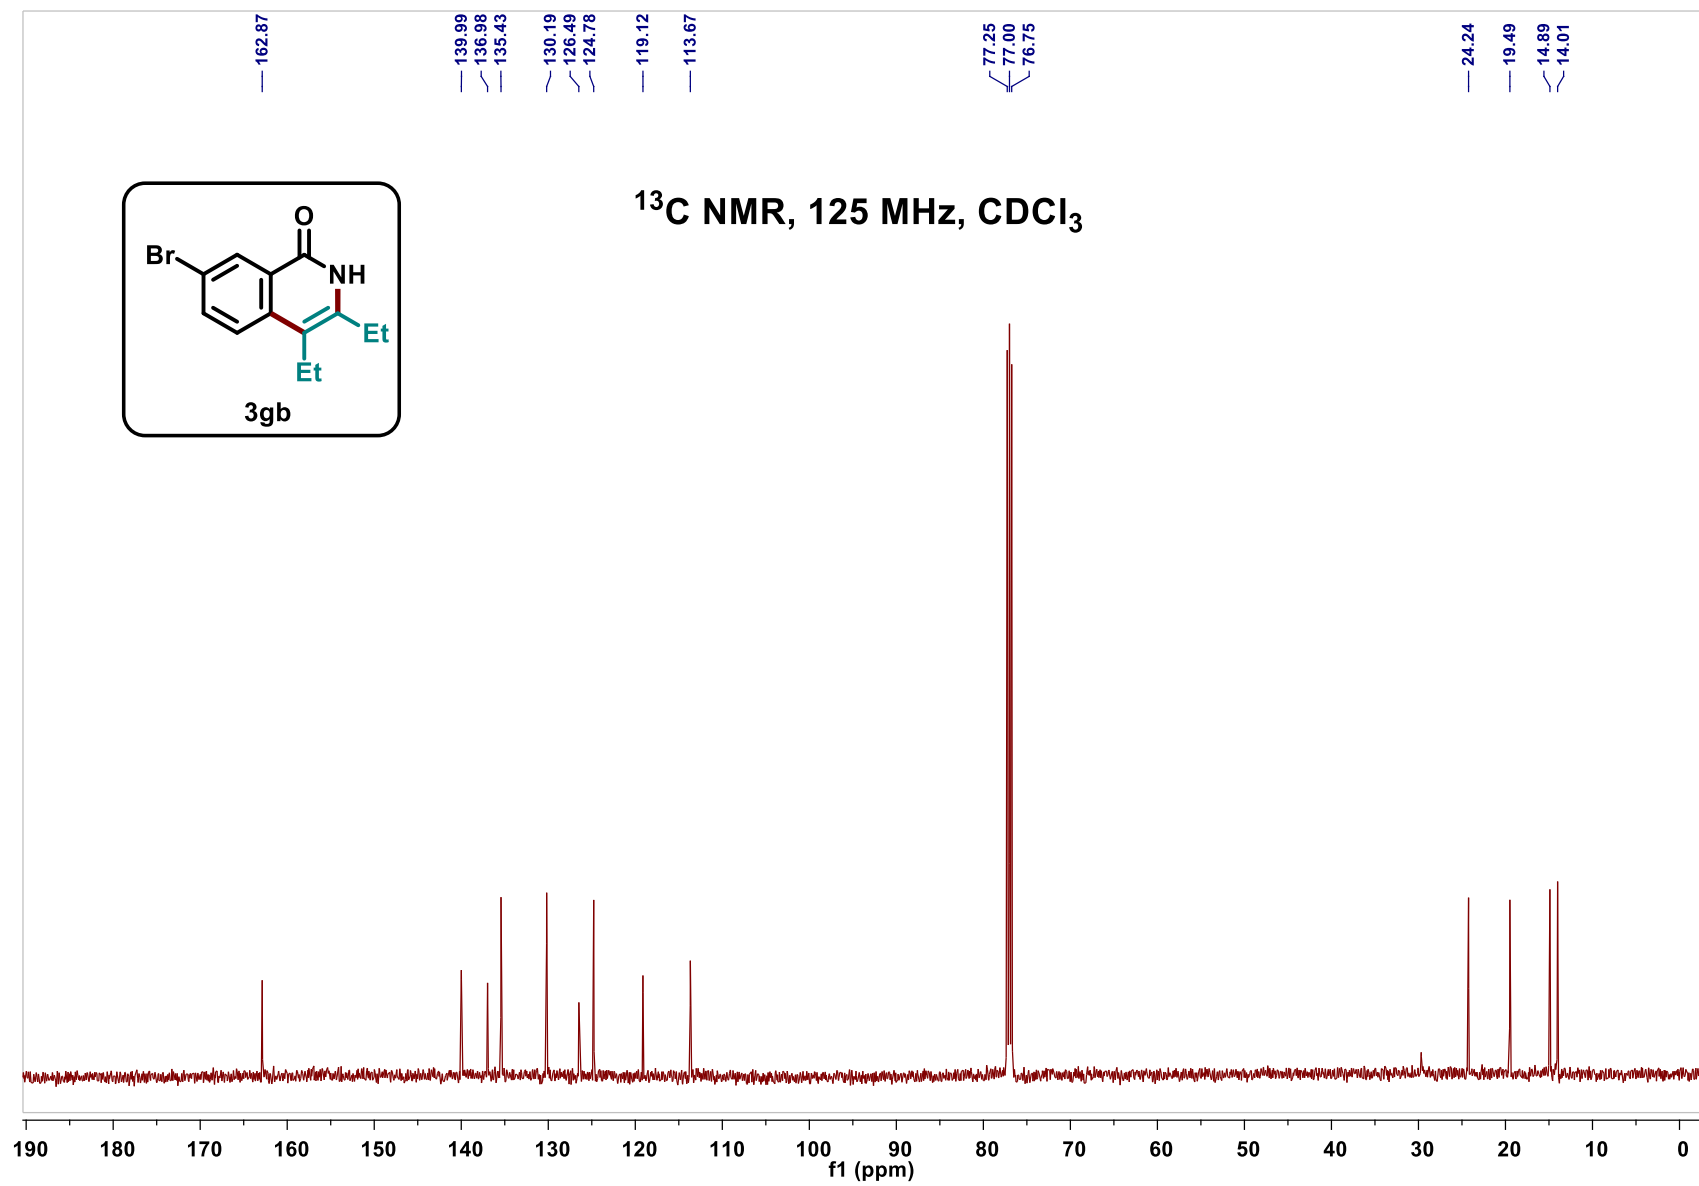

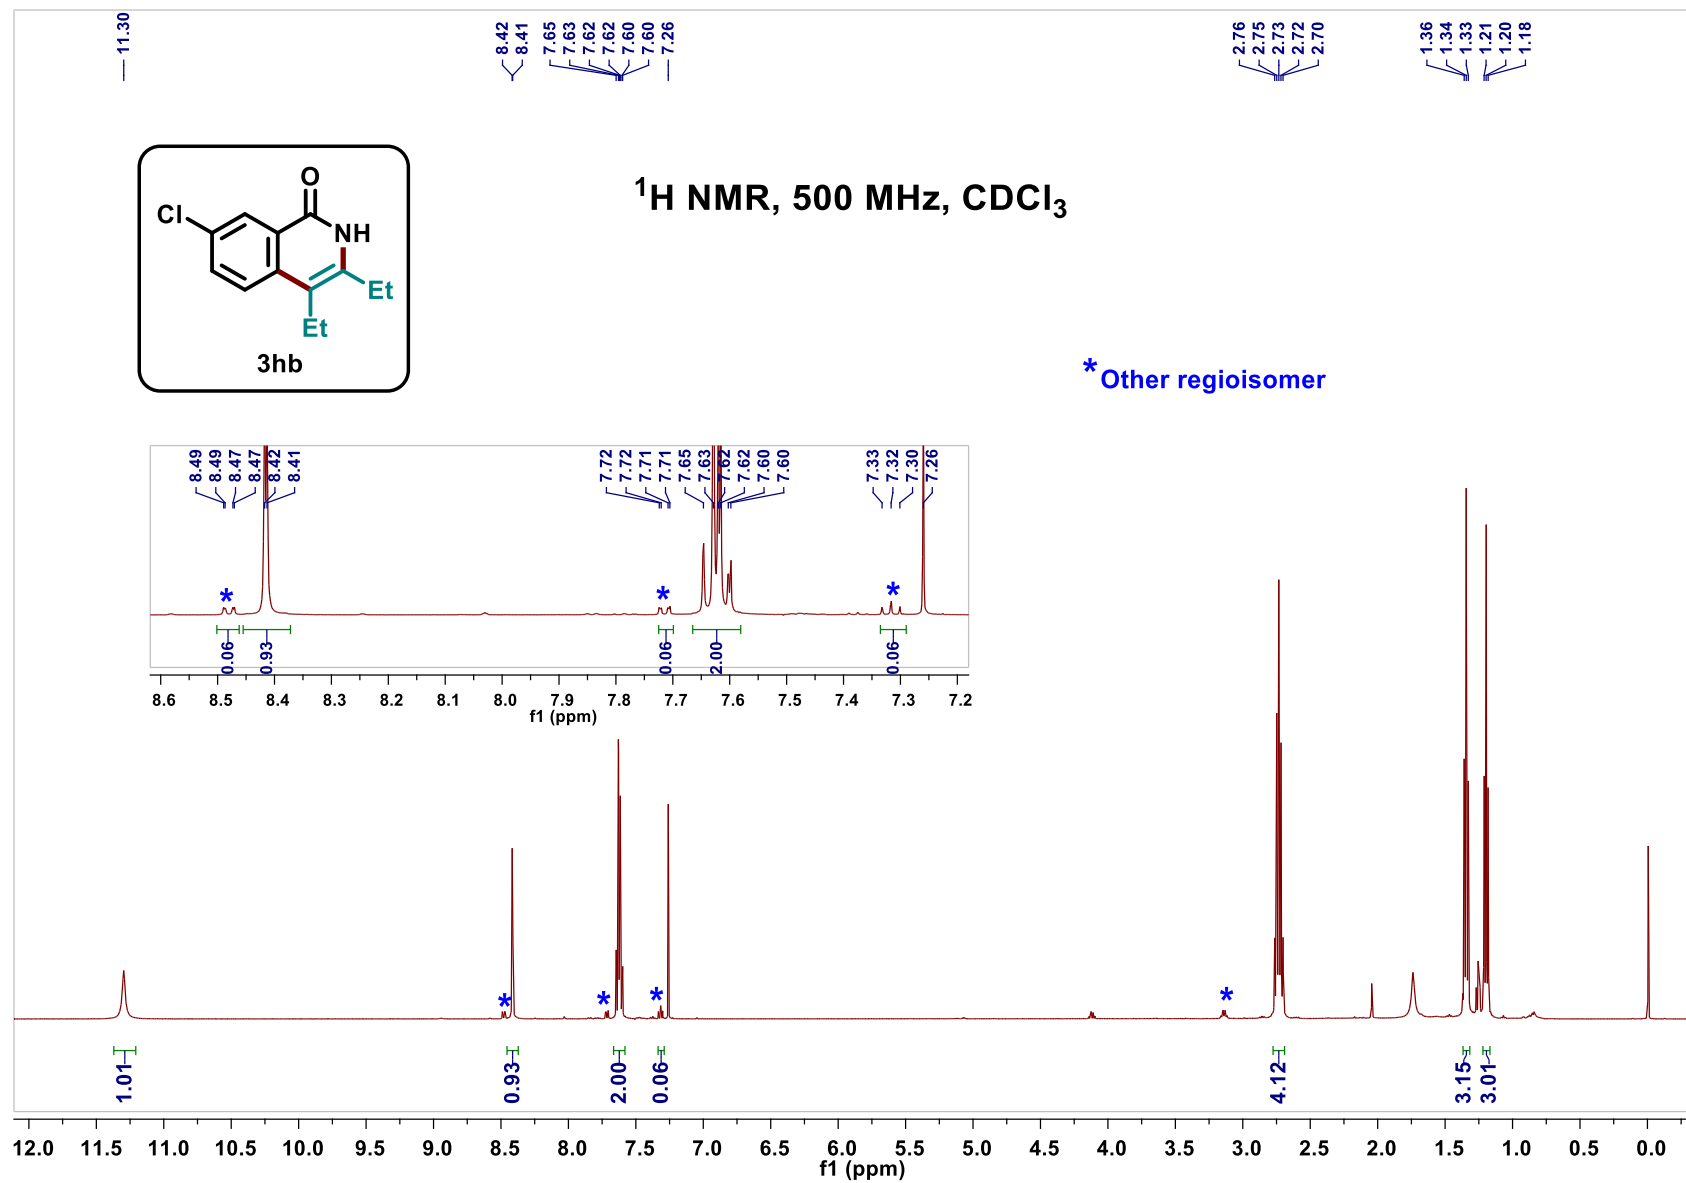

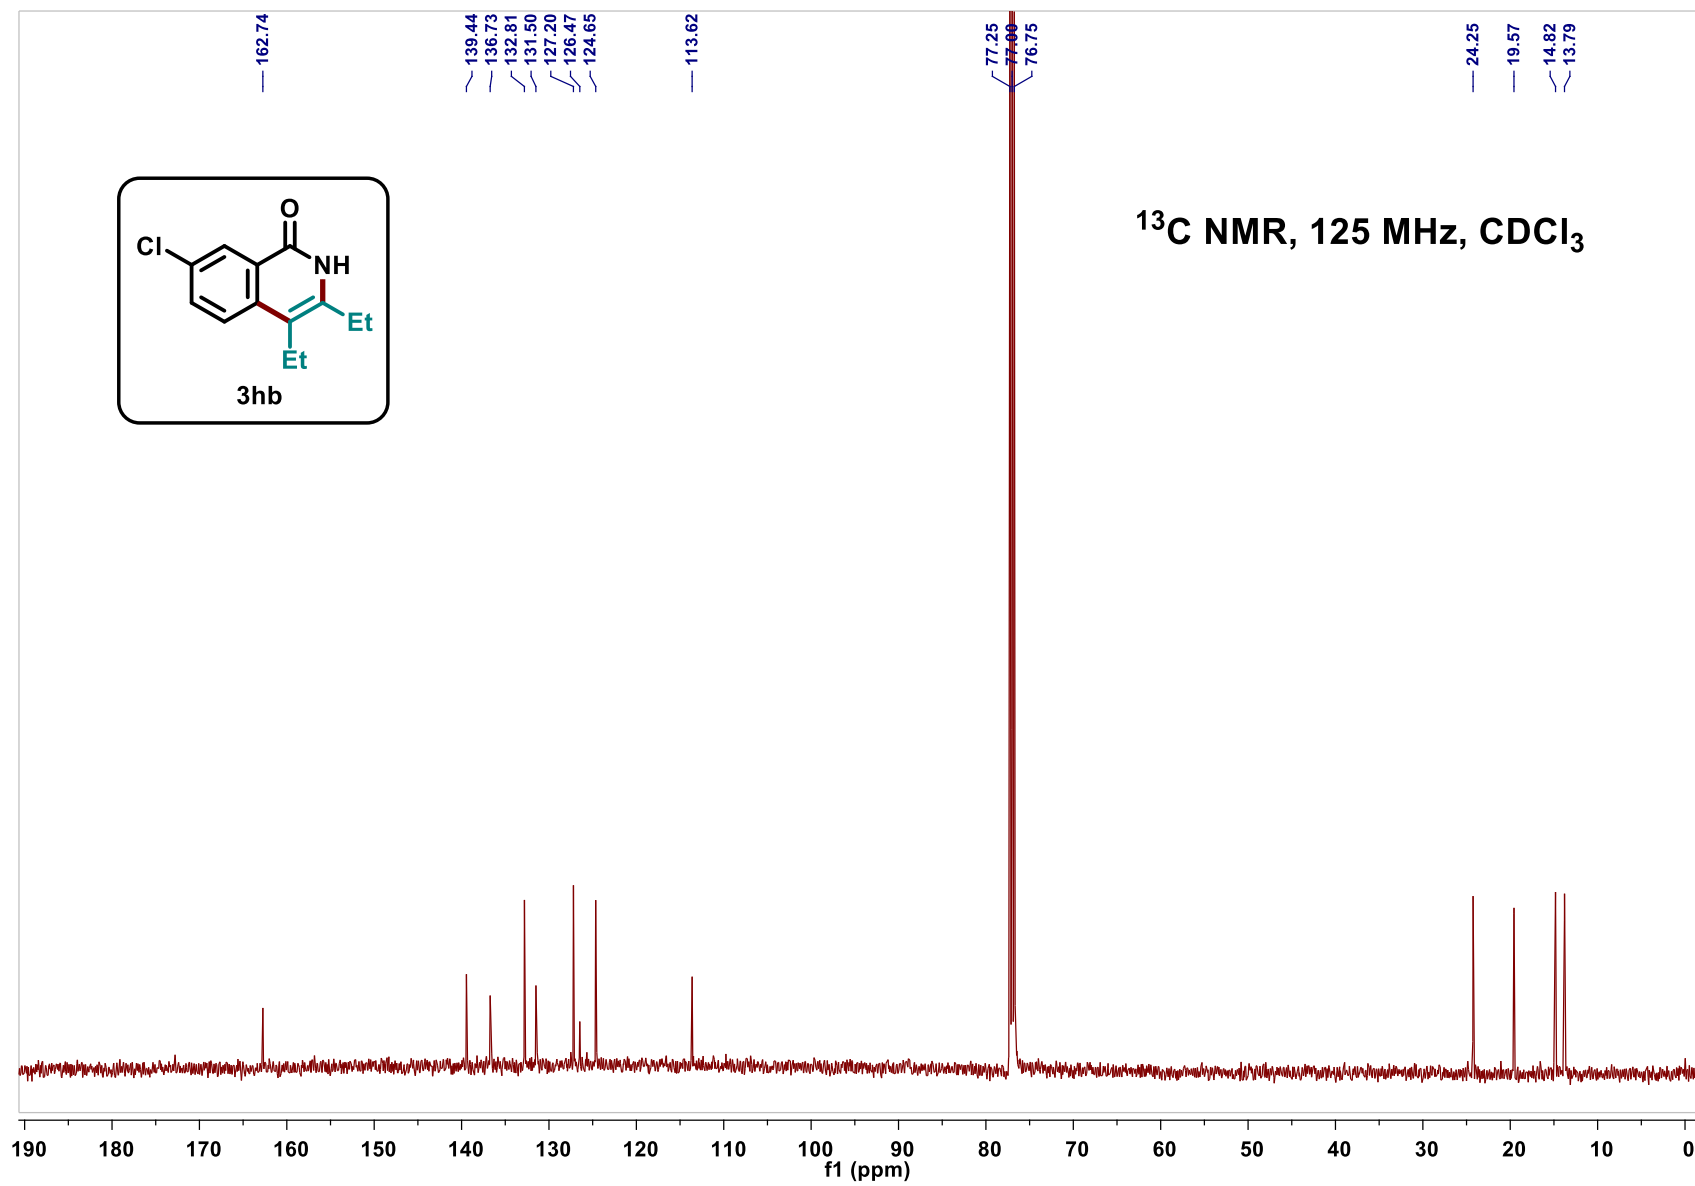

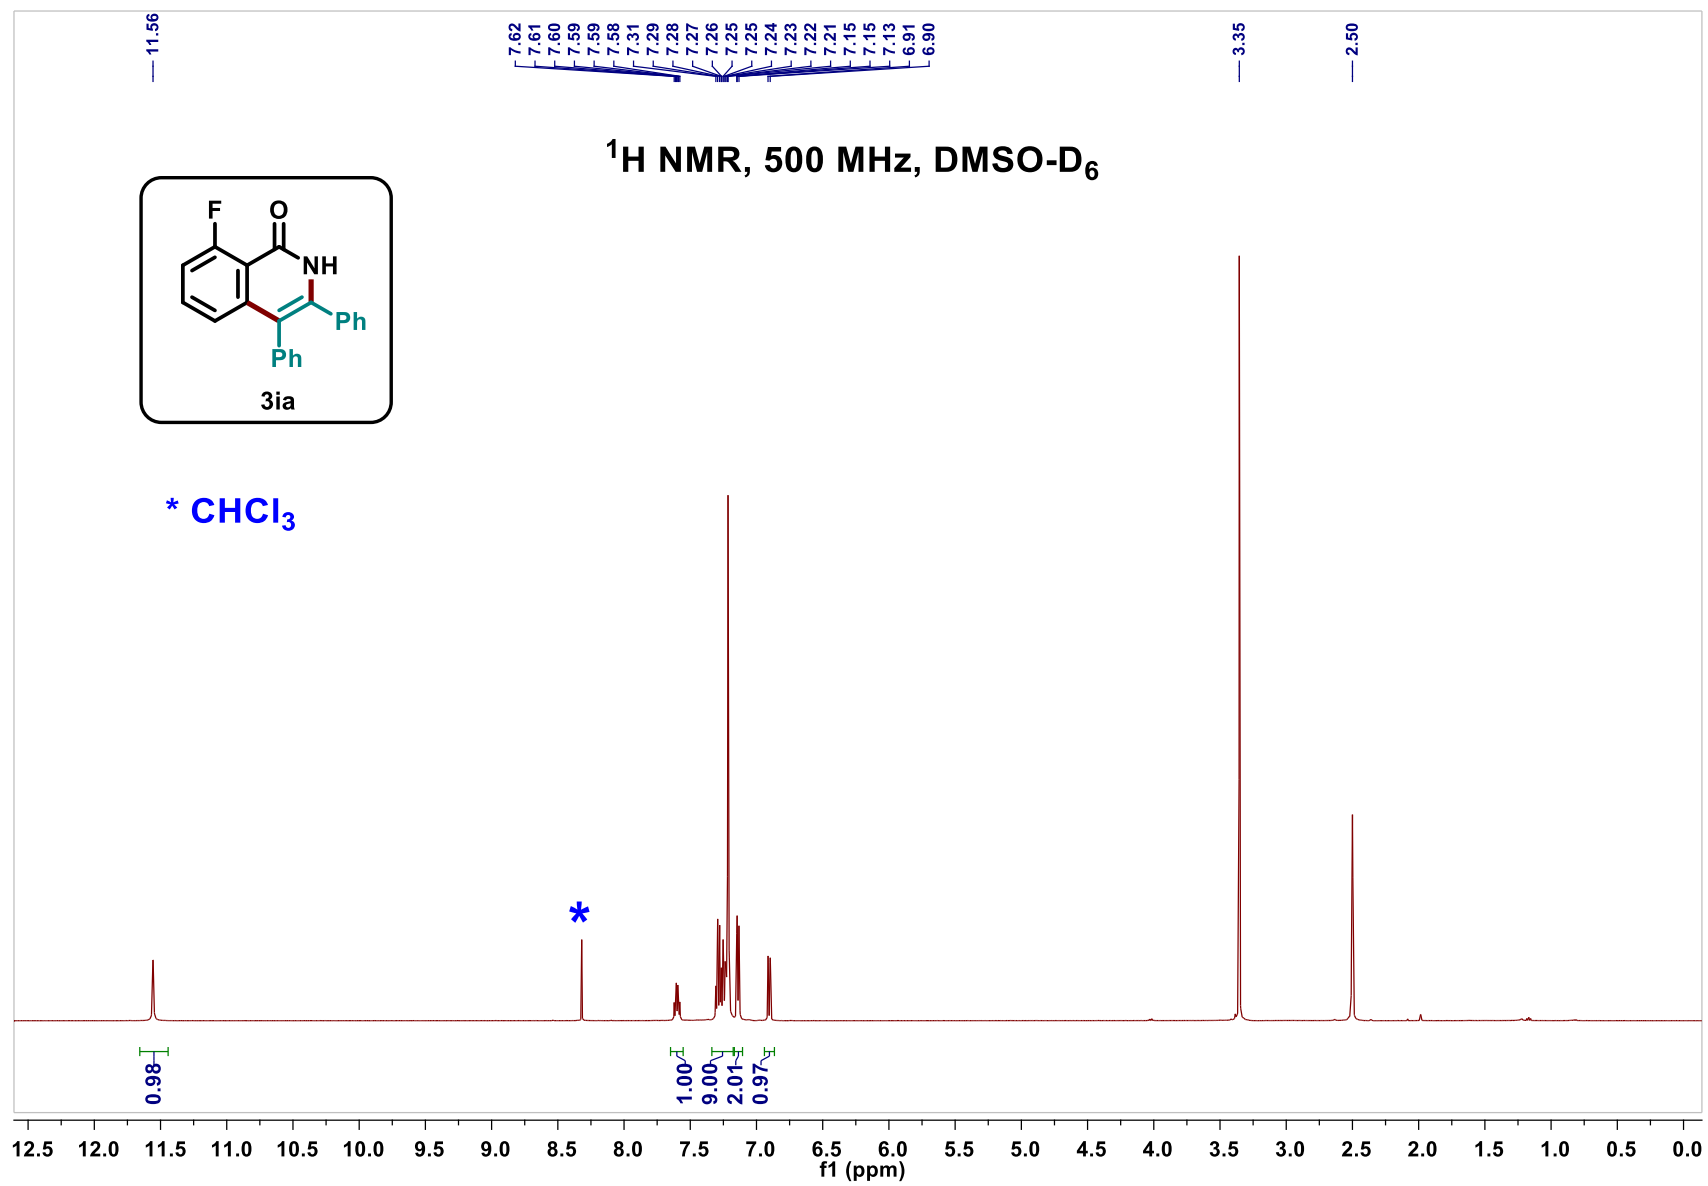

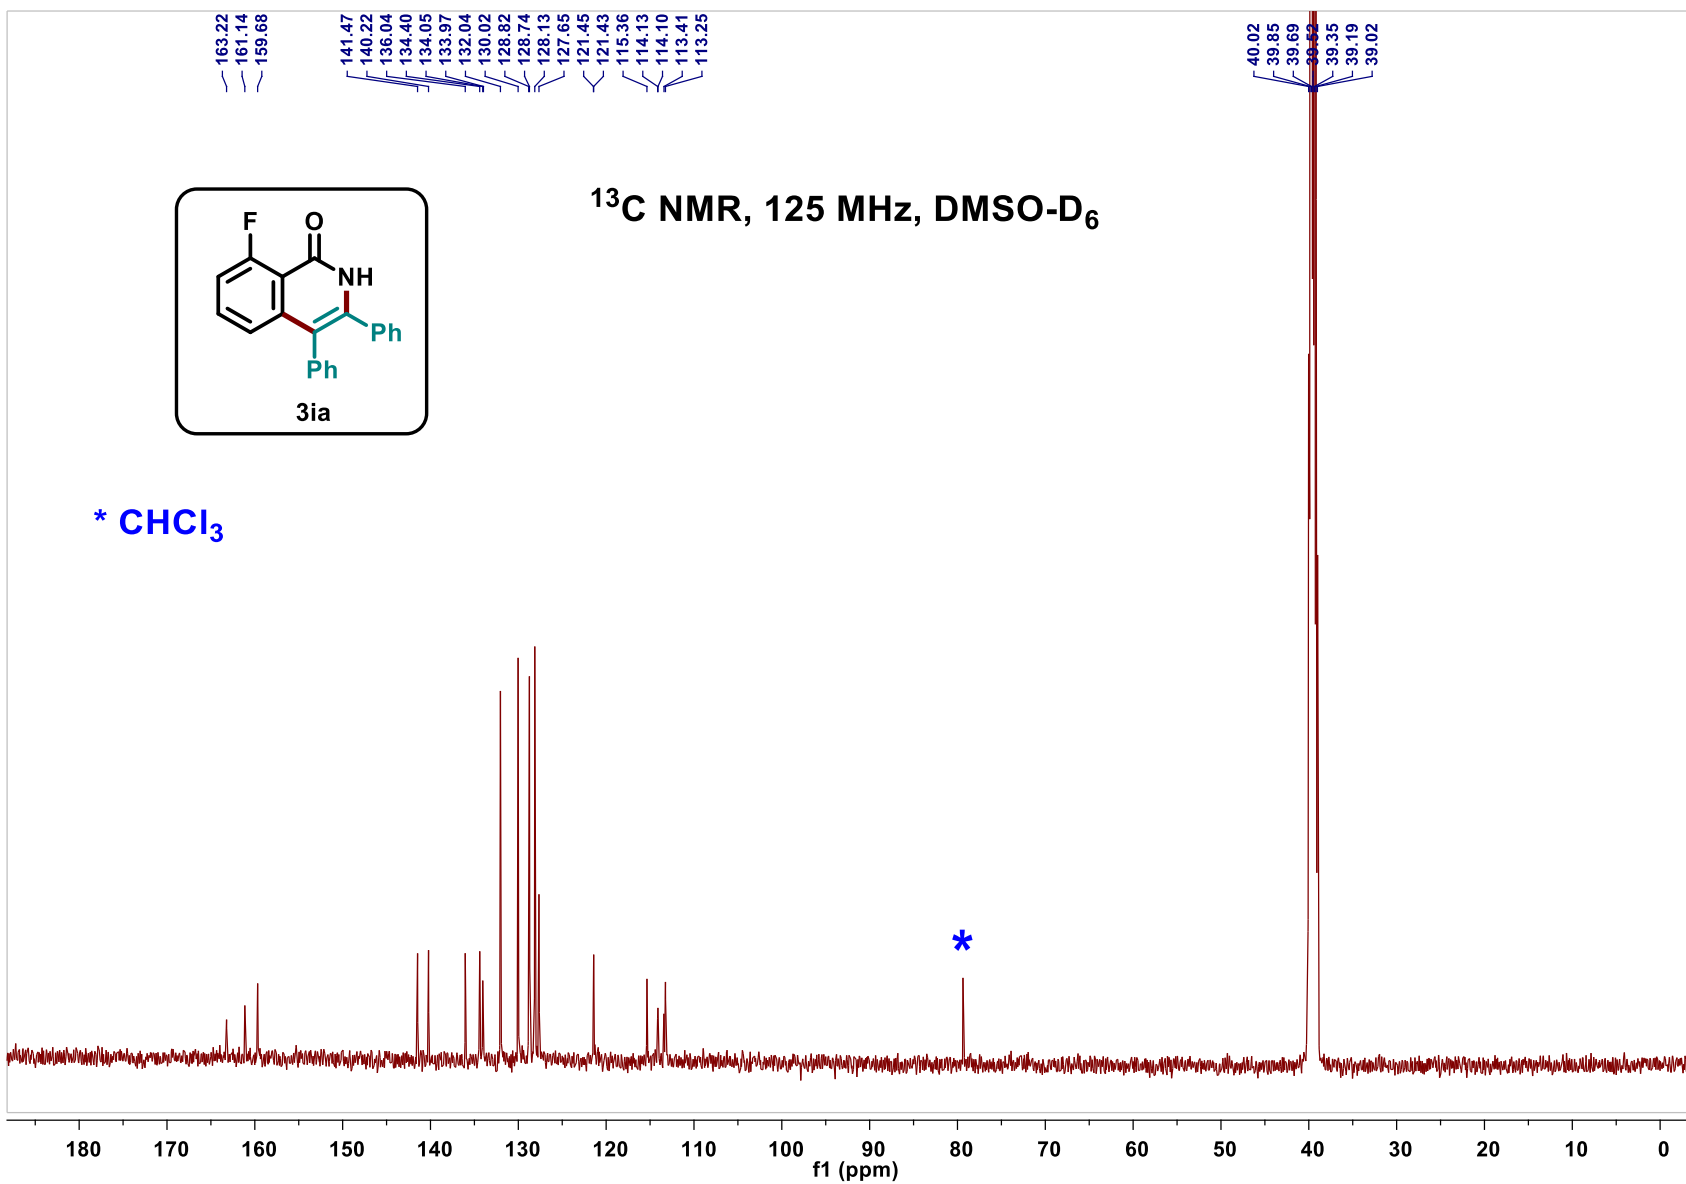



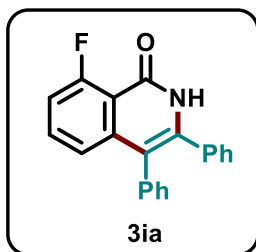

$^{19}\text{F}$  NMR, 470 MHz, DMSO- $\text{D}_6$

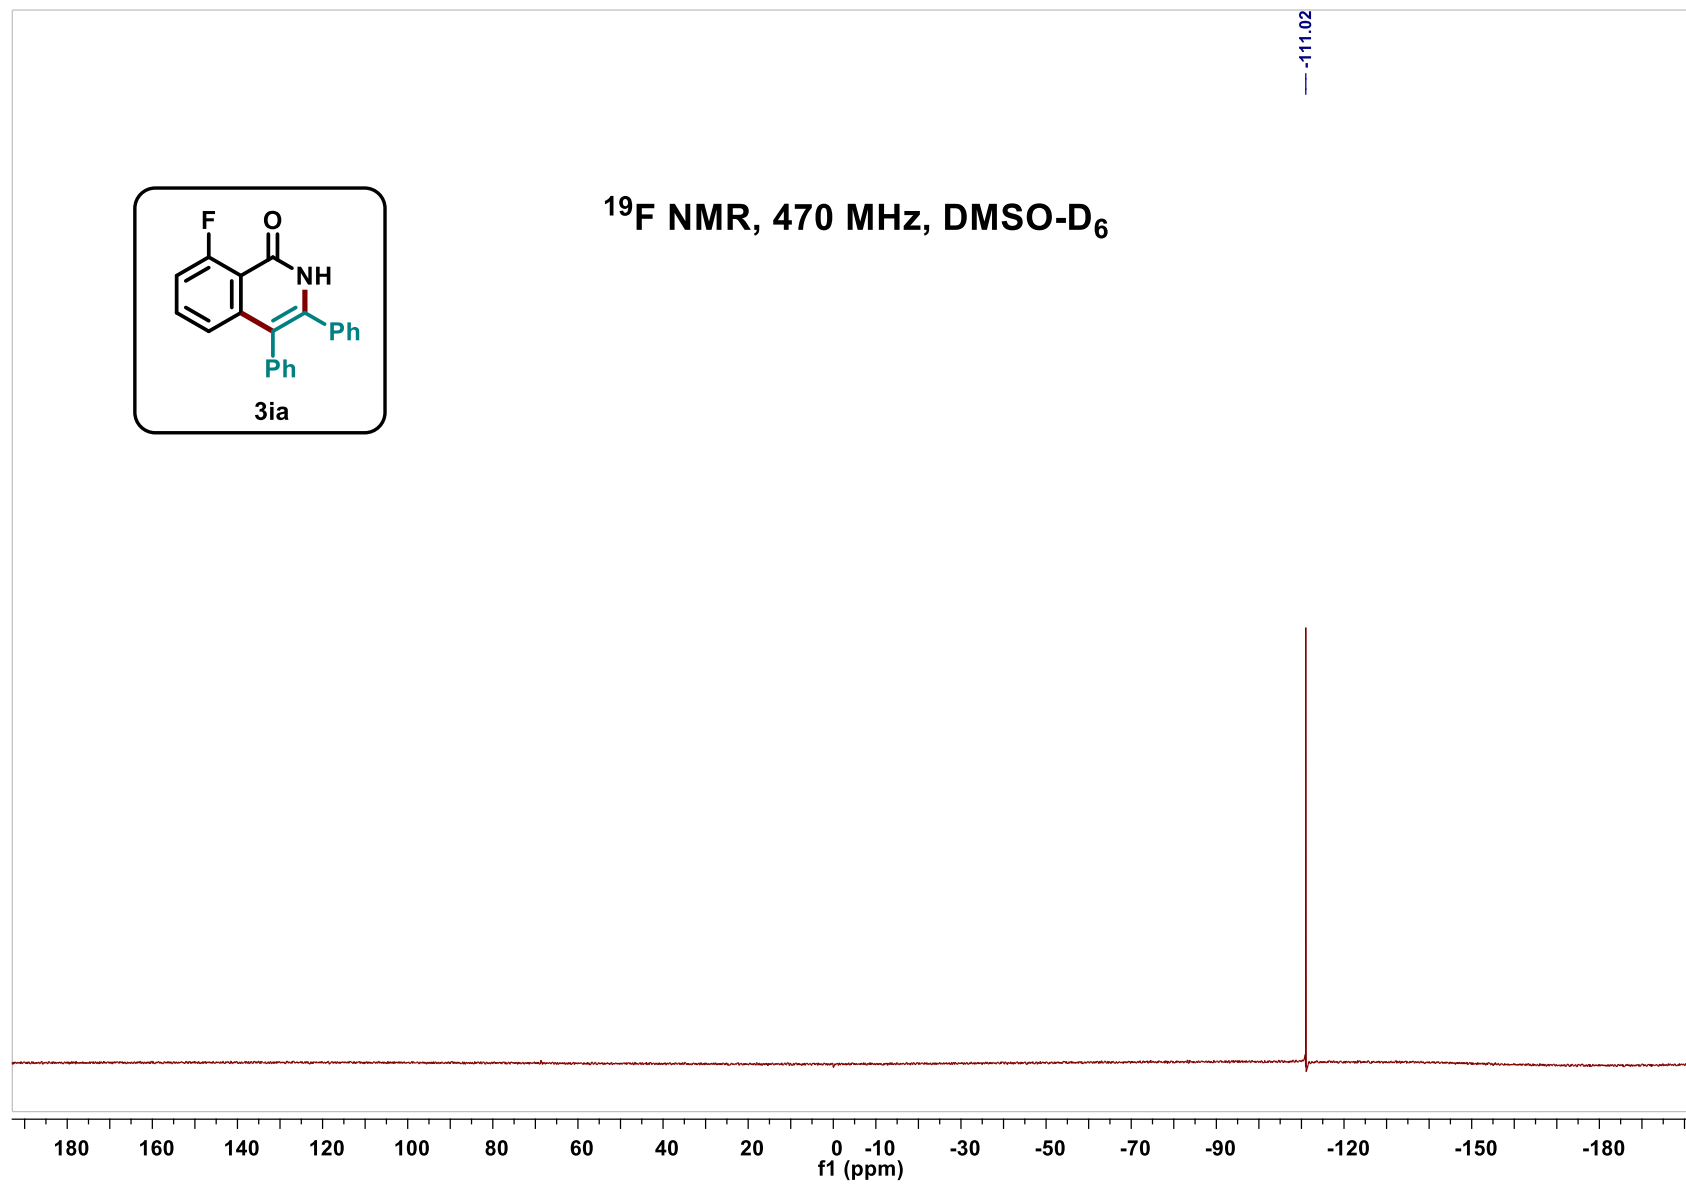

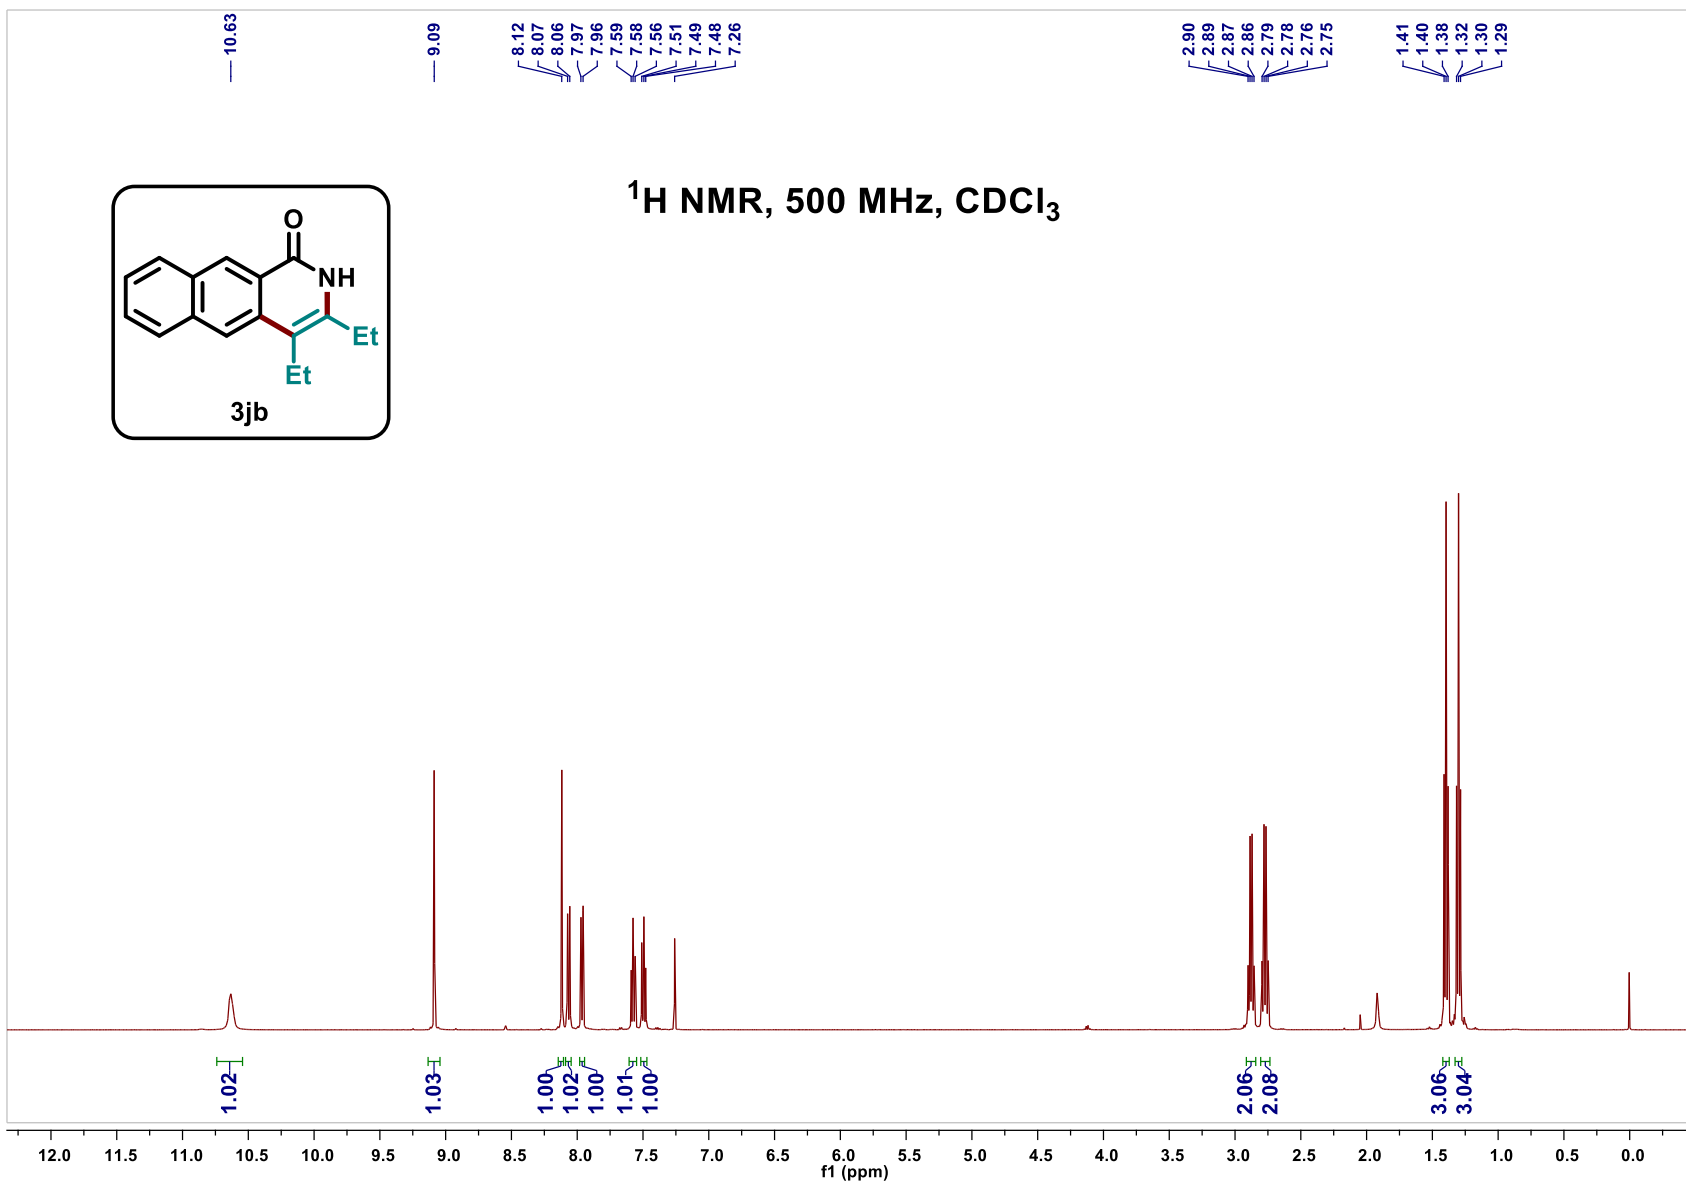

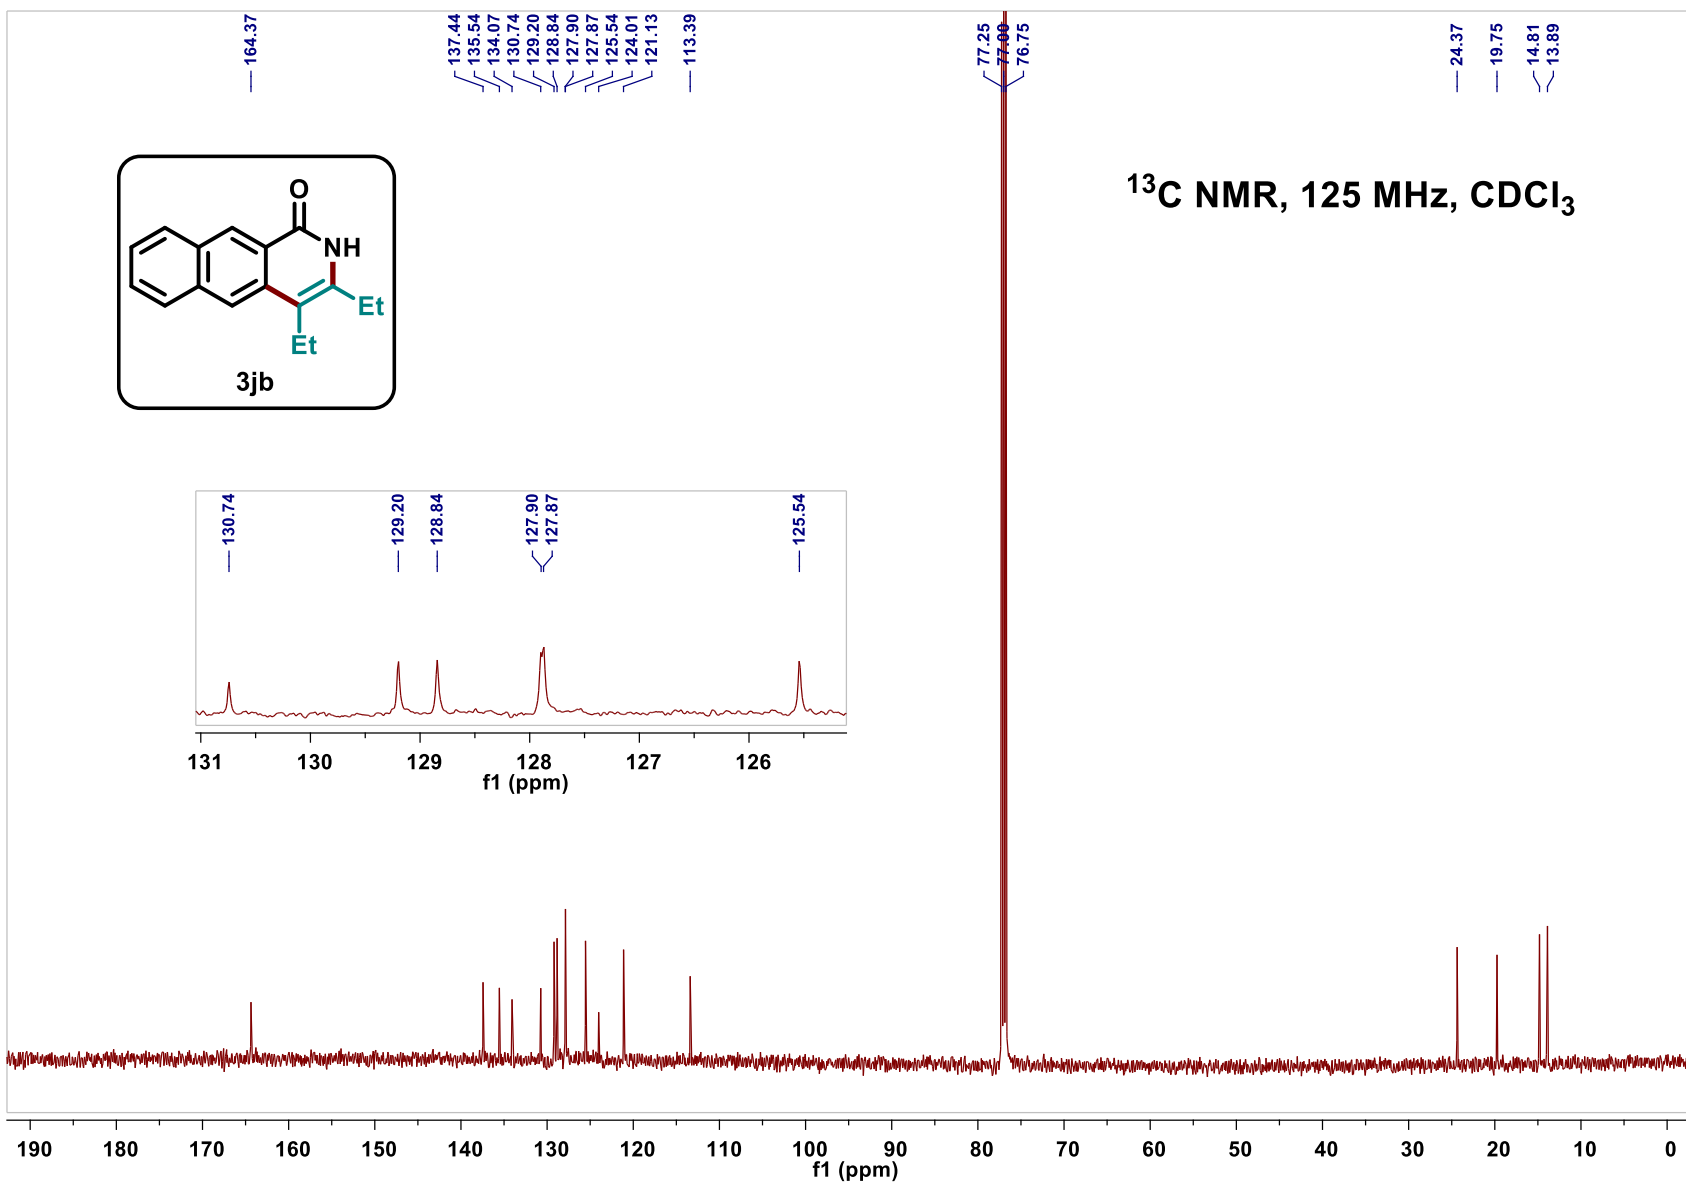

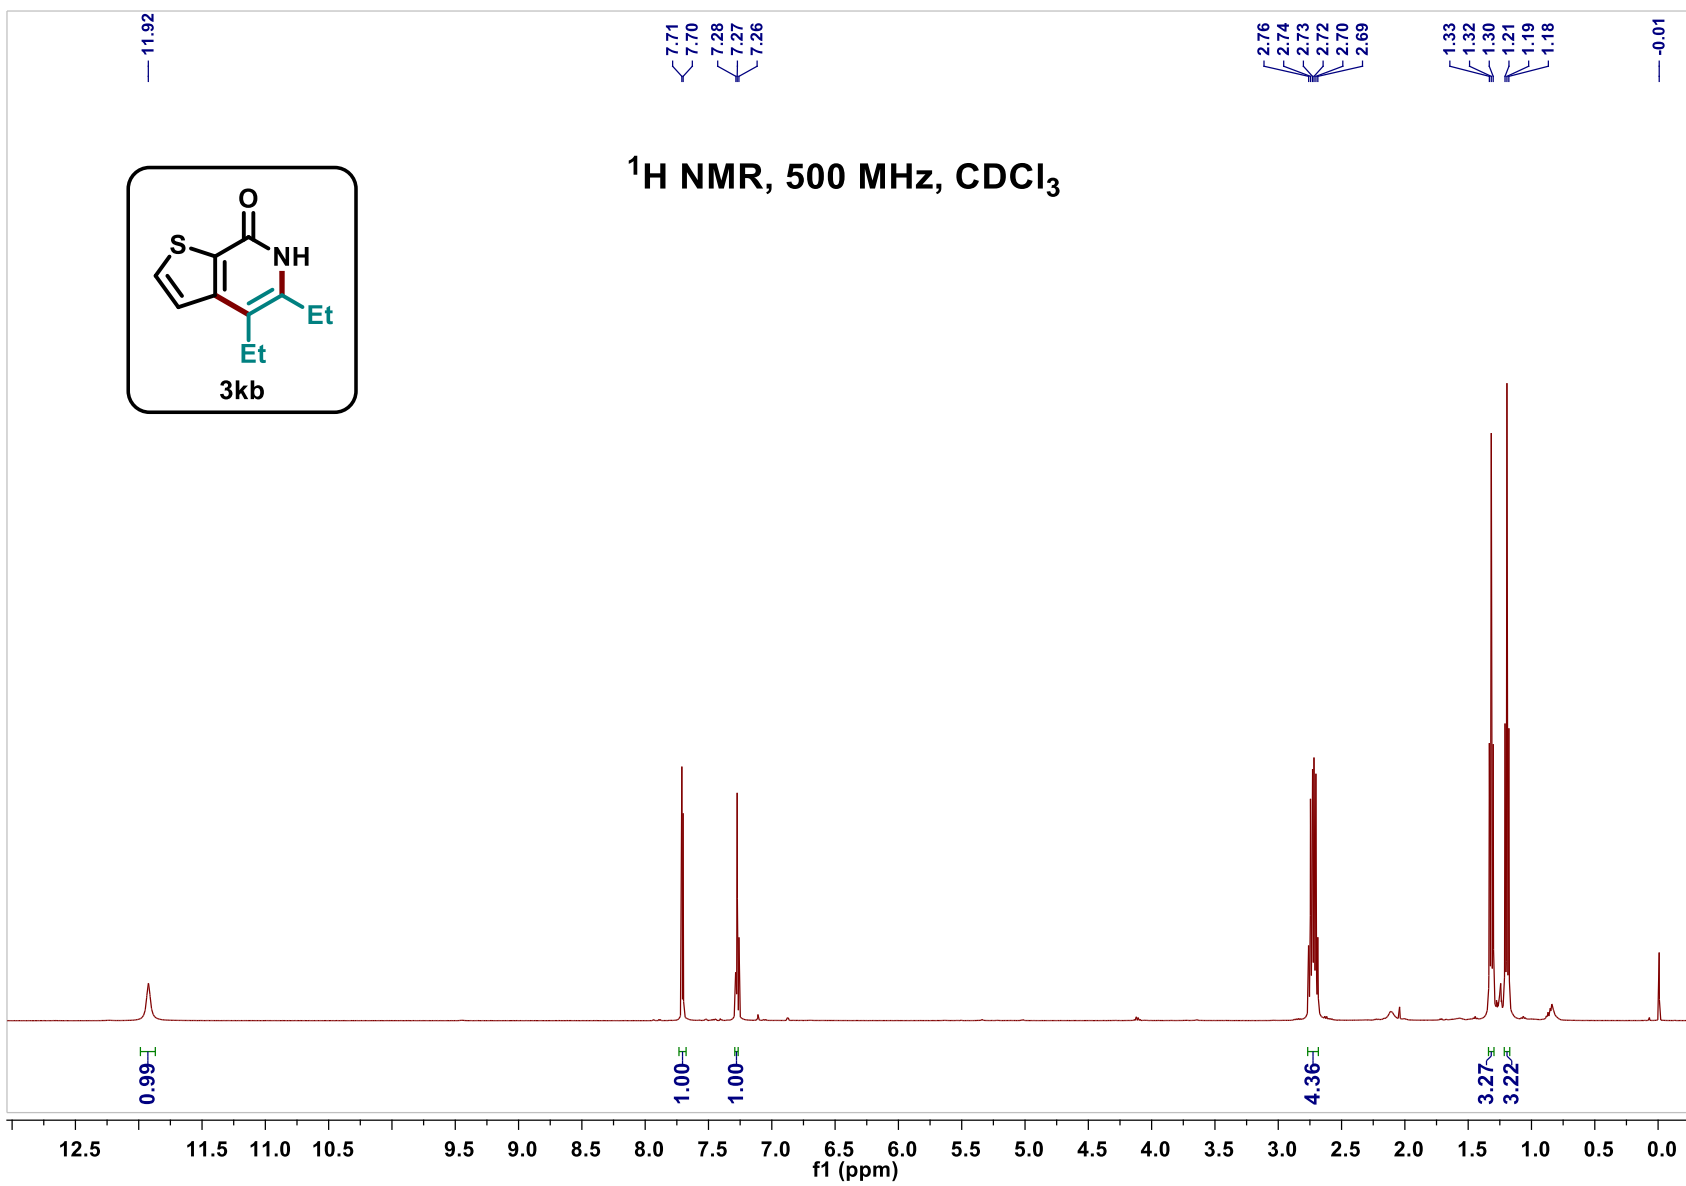

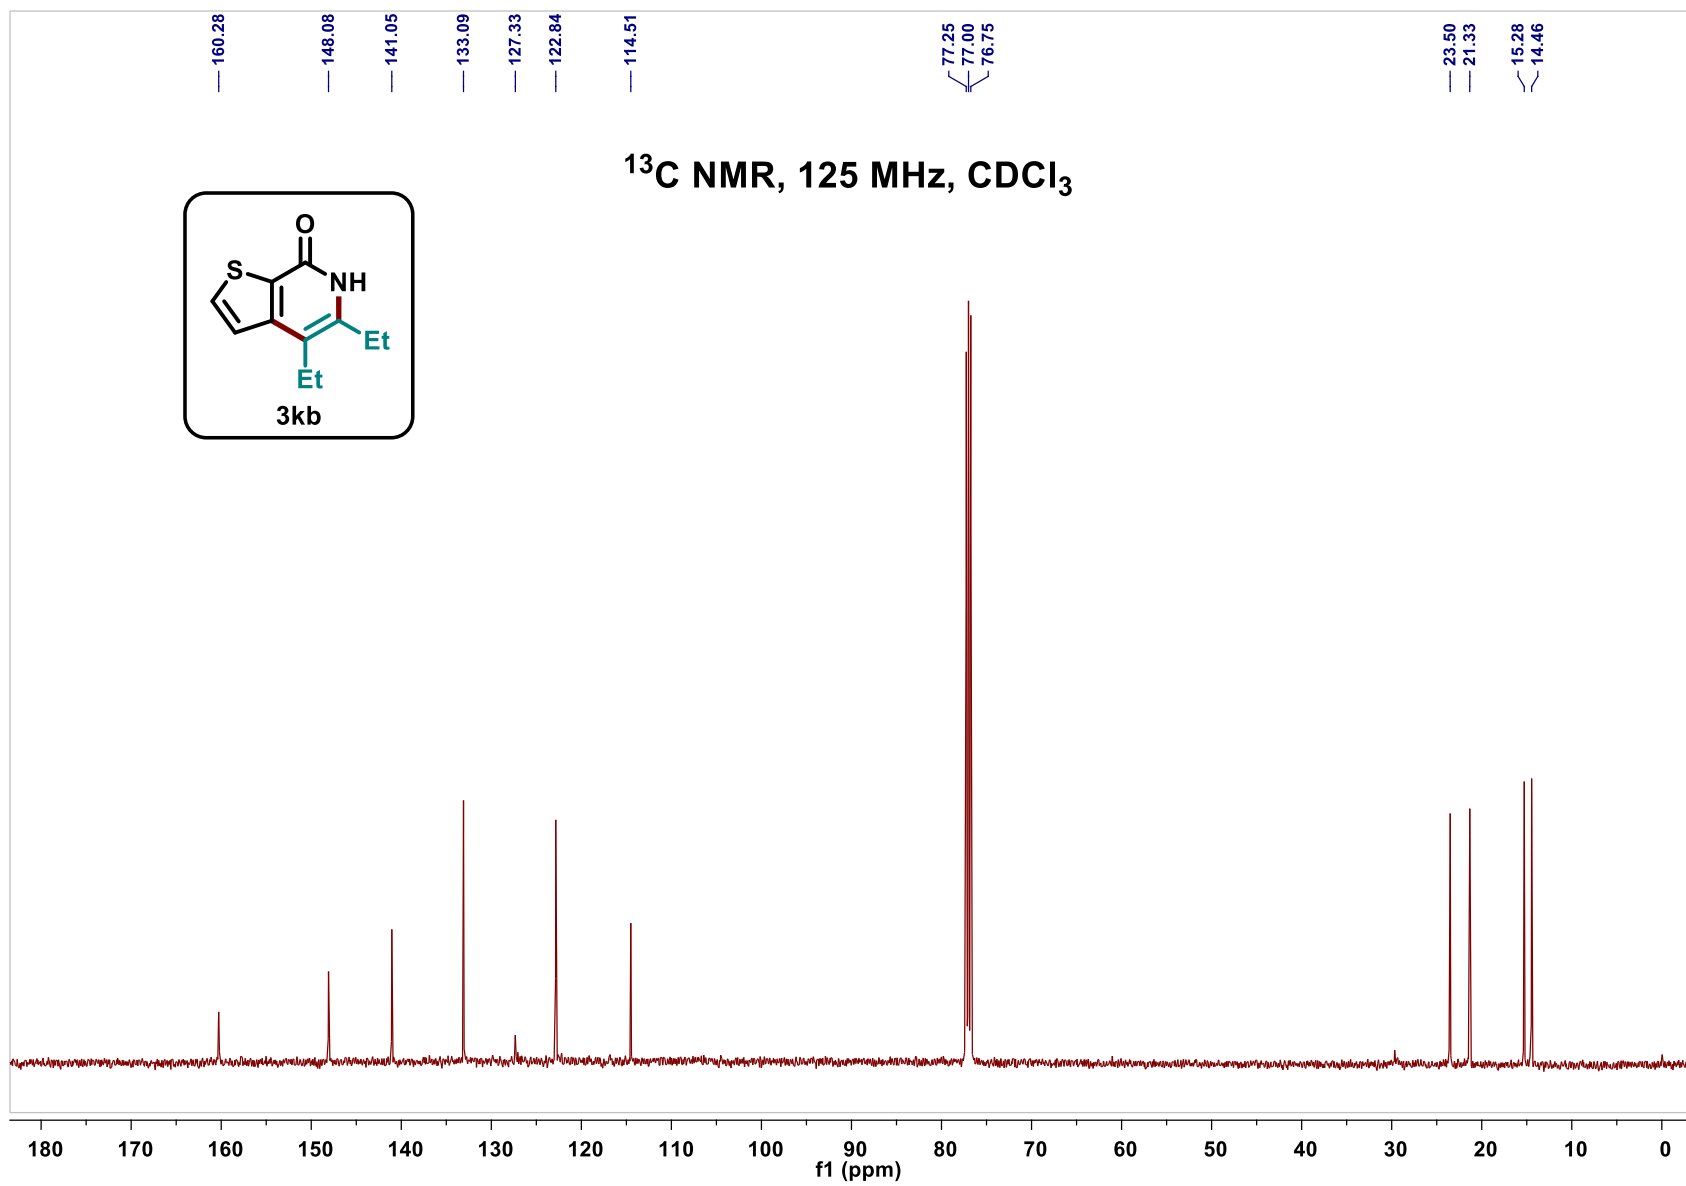

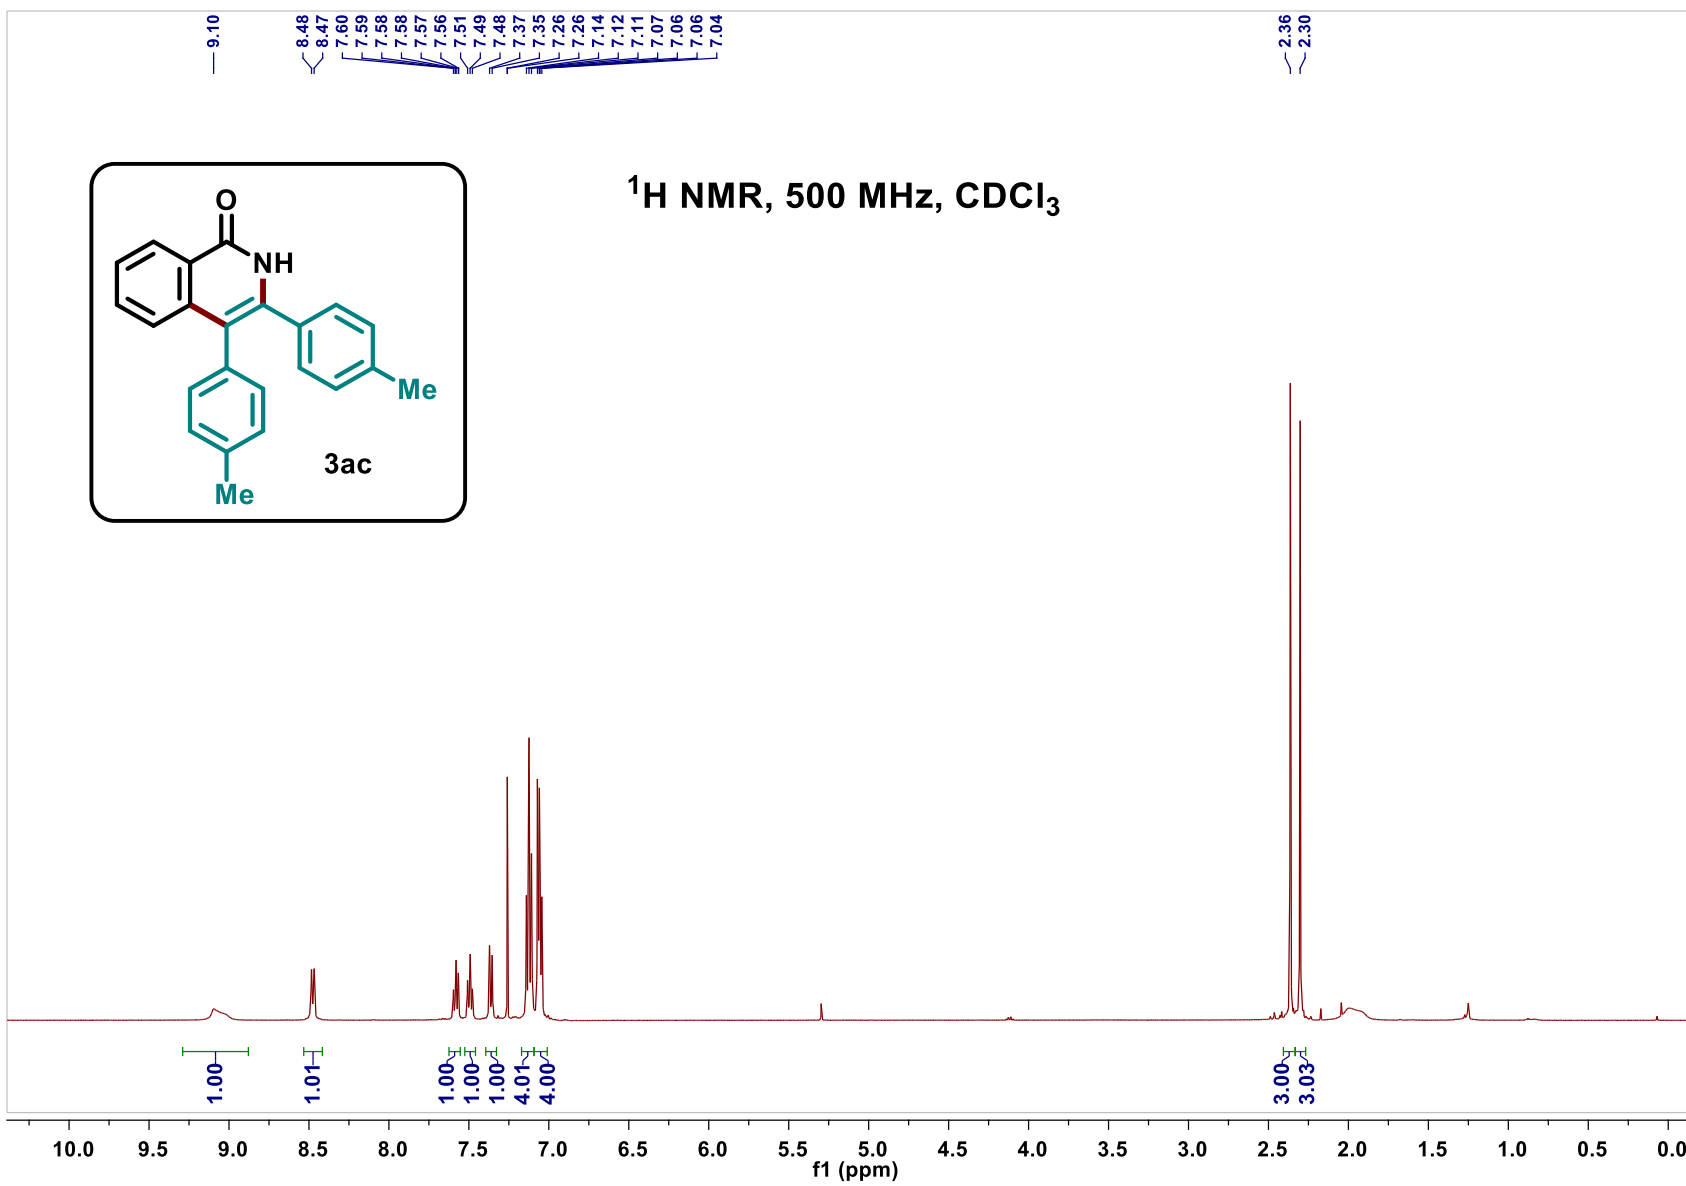

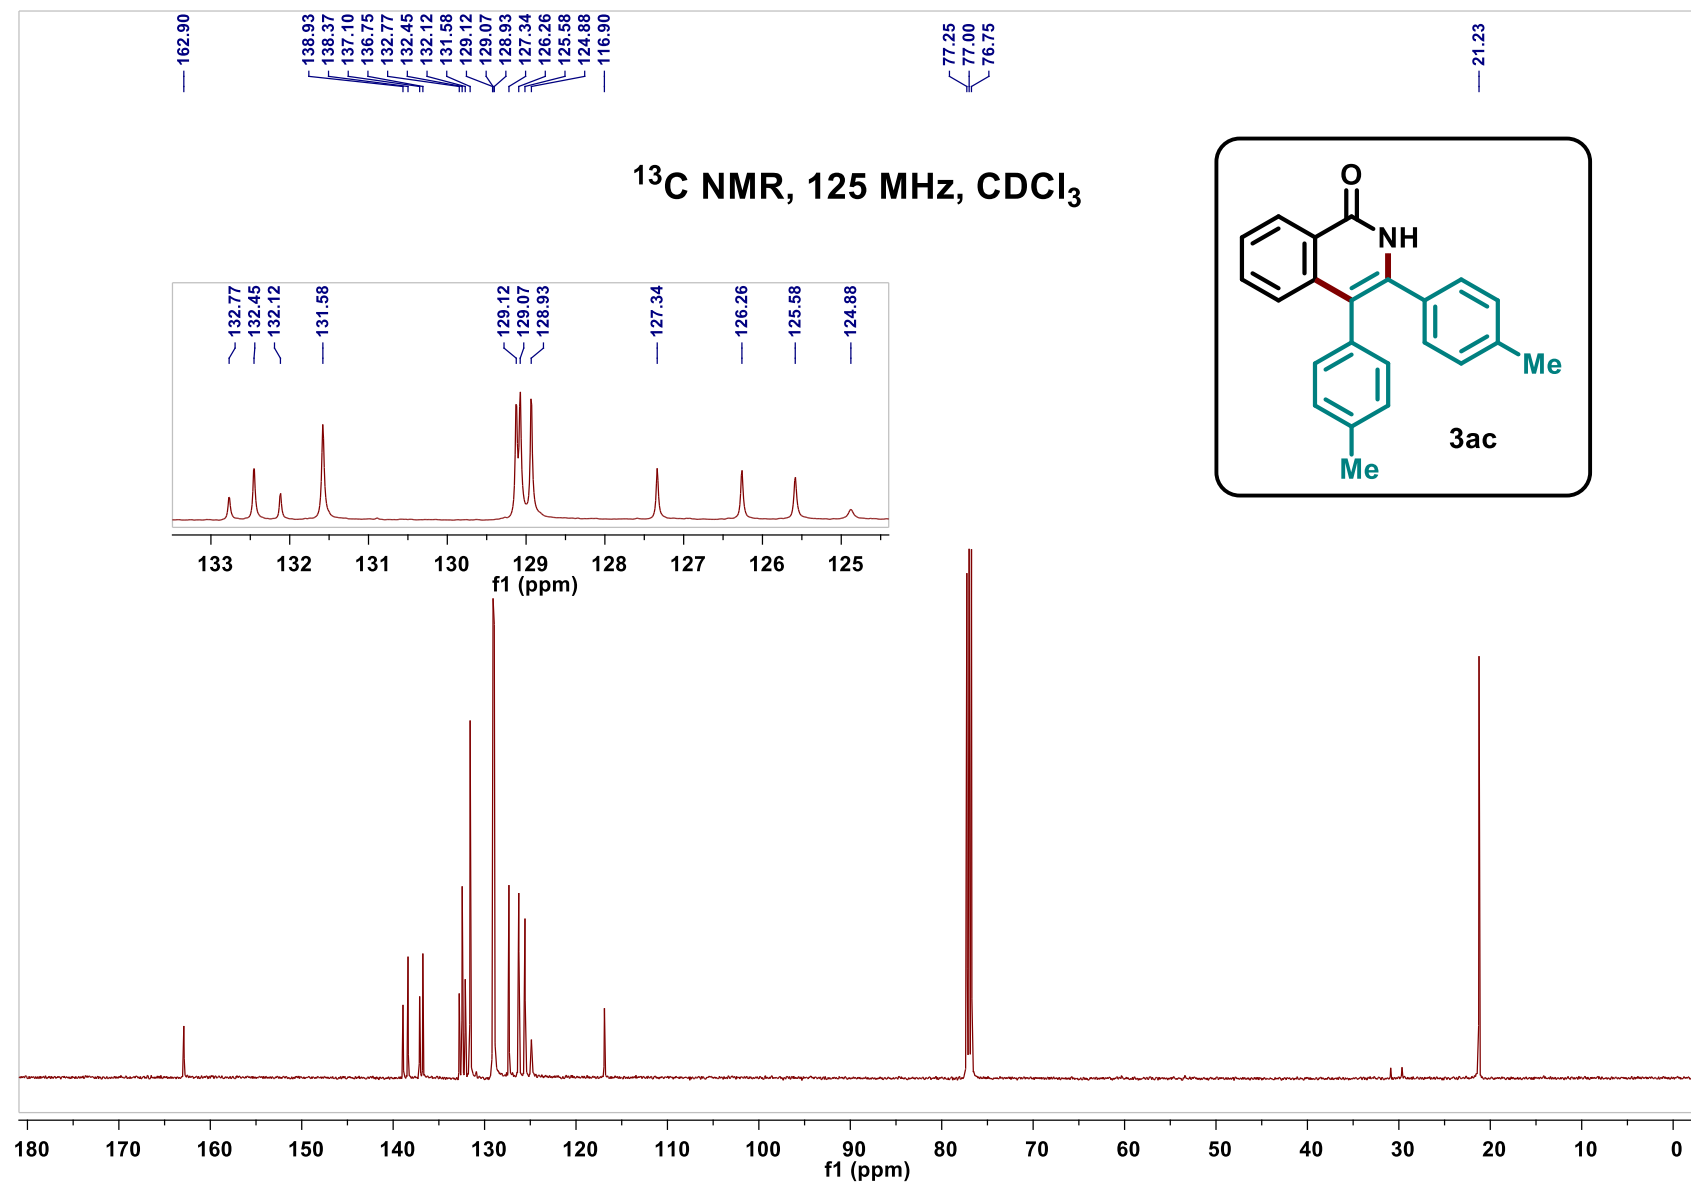

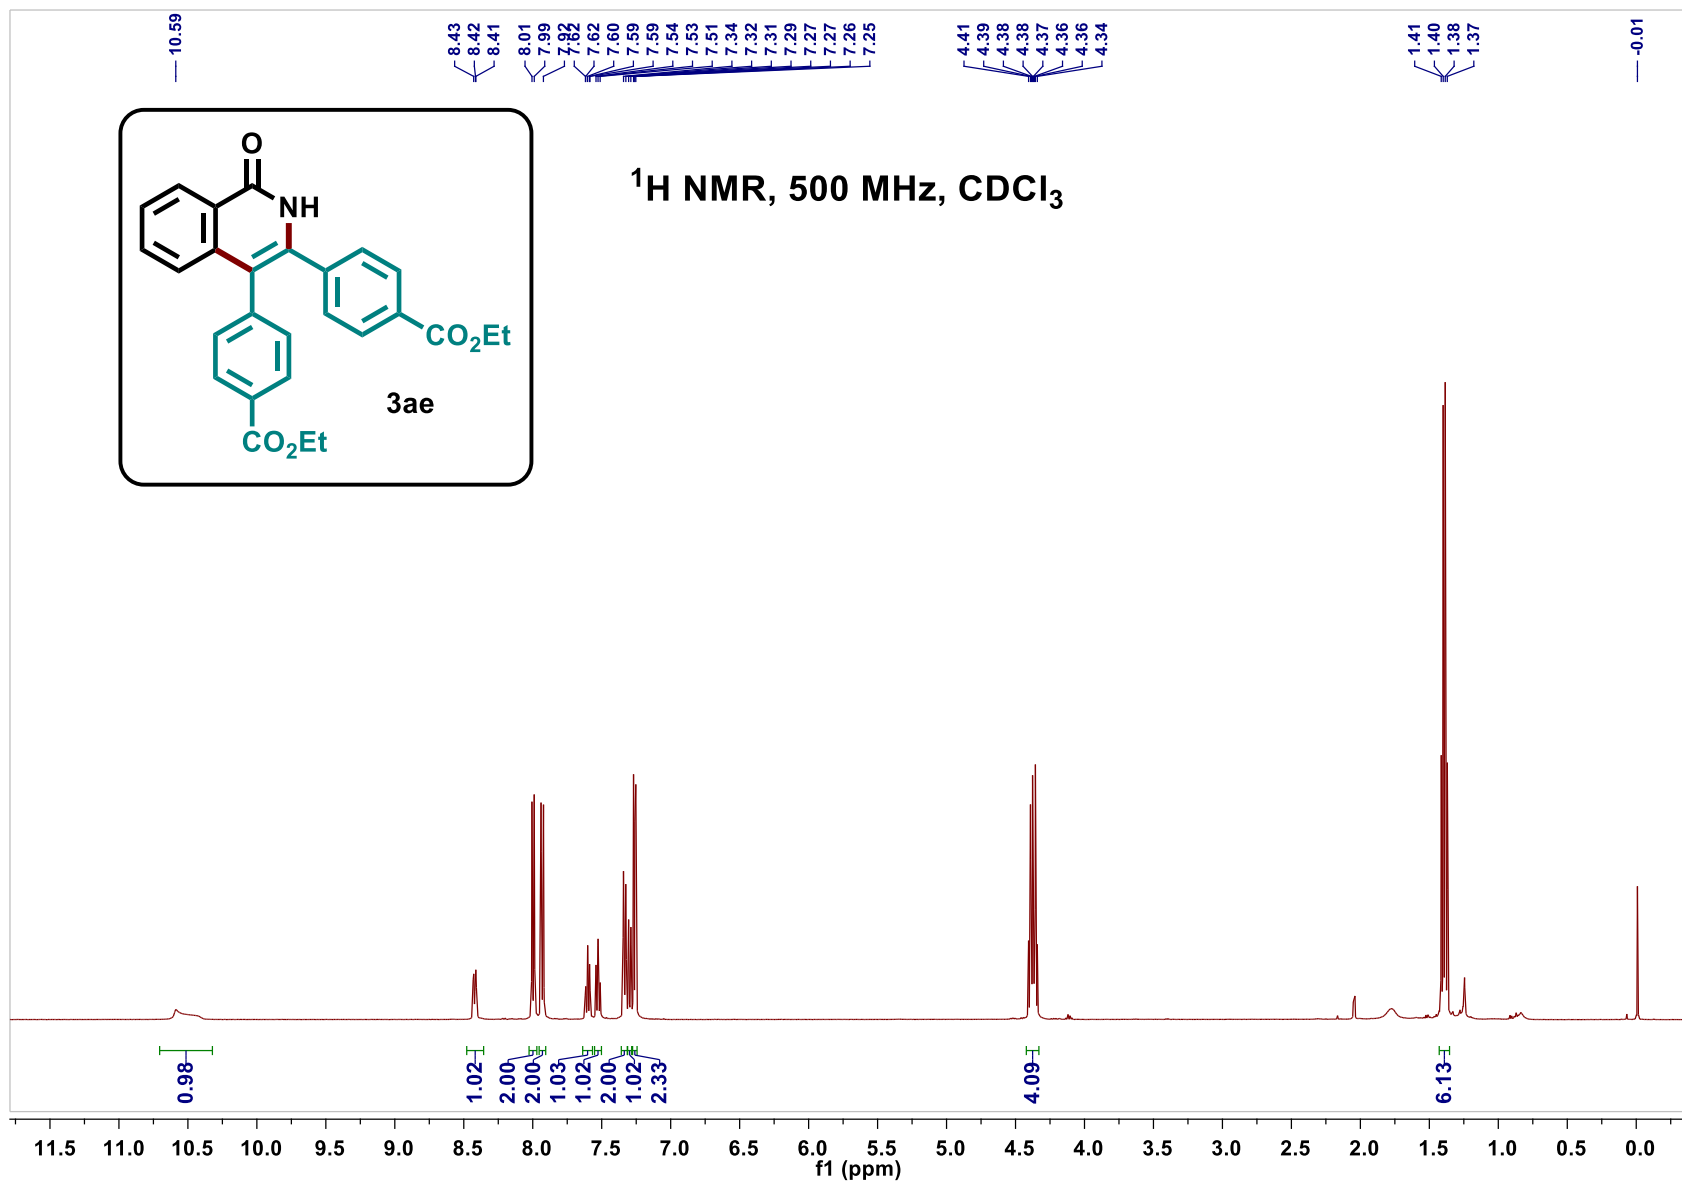



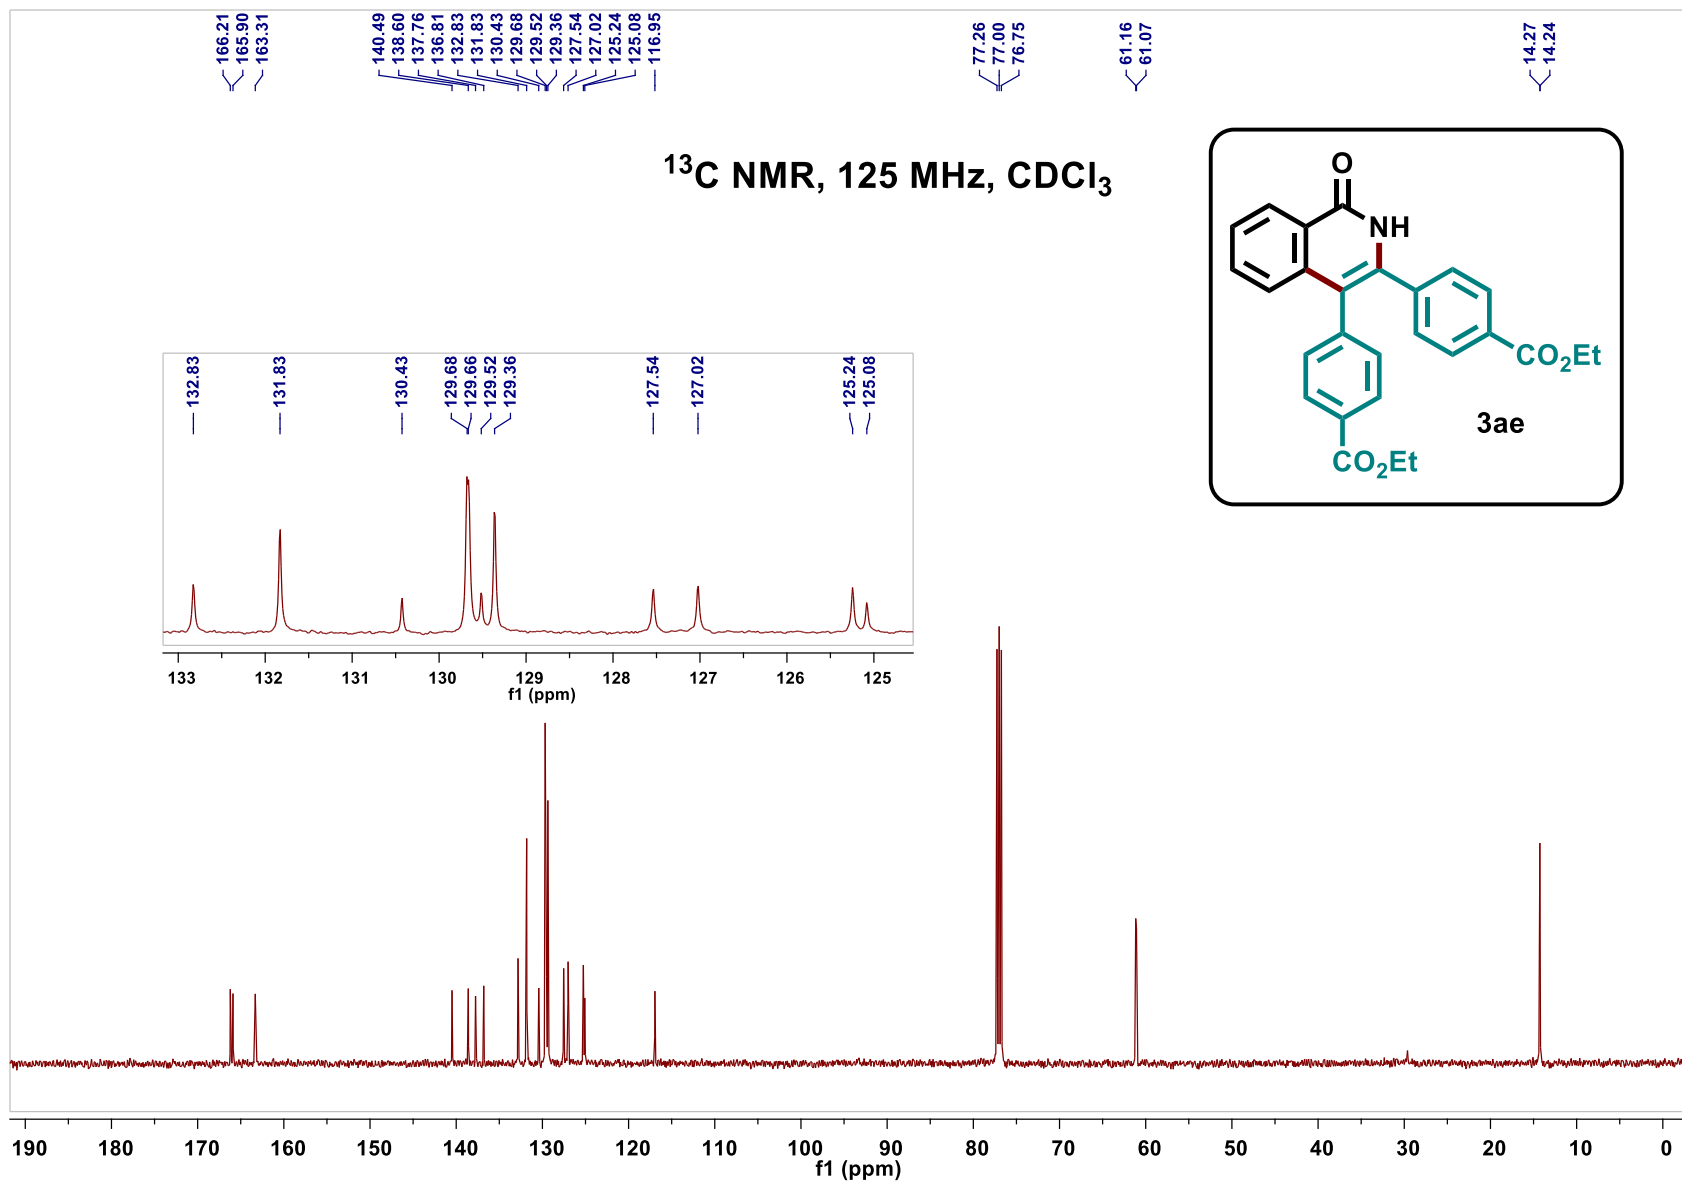

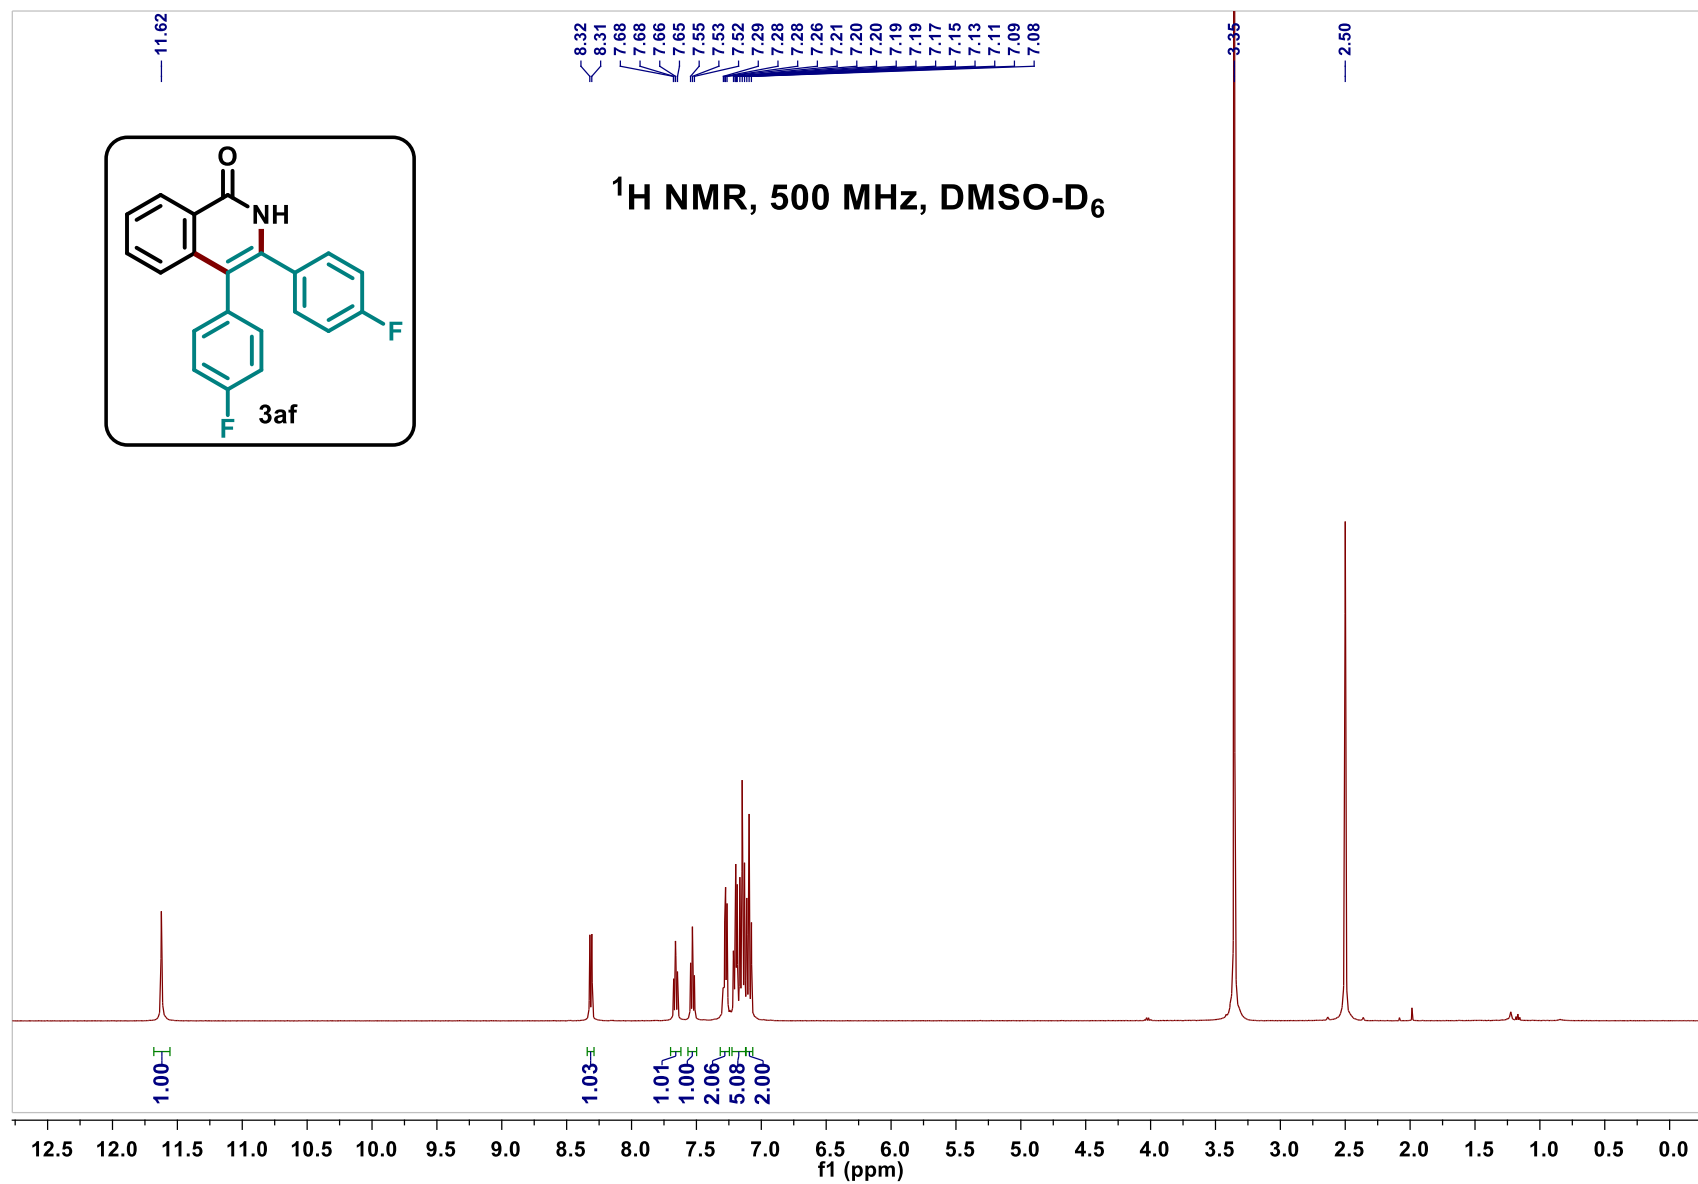

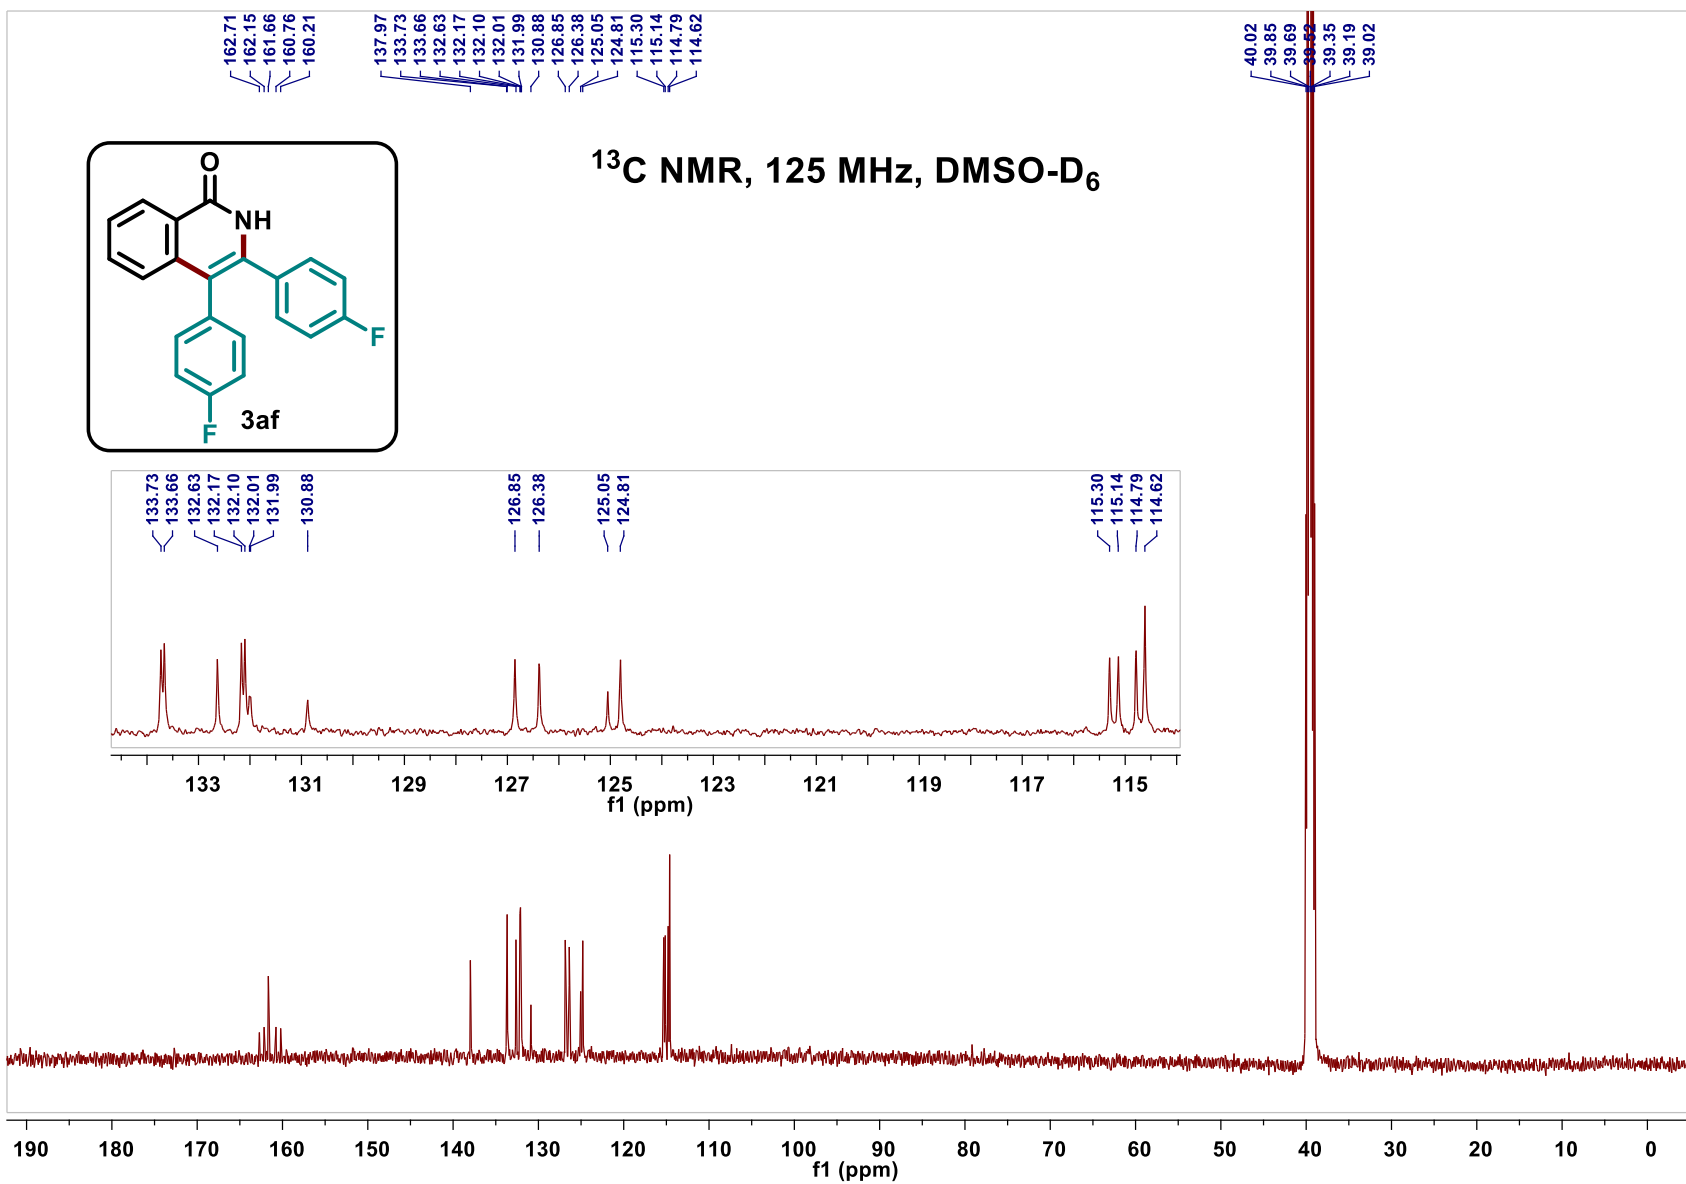

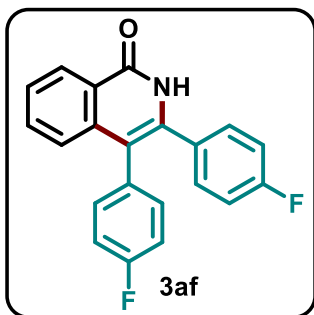

$^{19}\text{F}$  NMR, 470 MHz,  $\text{CDCl}_3$

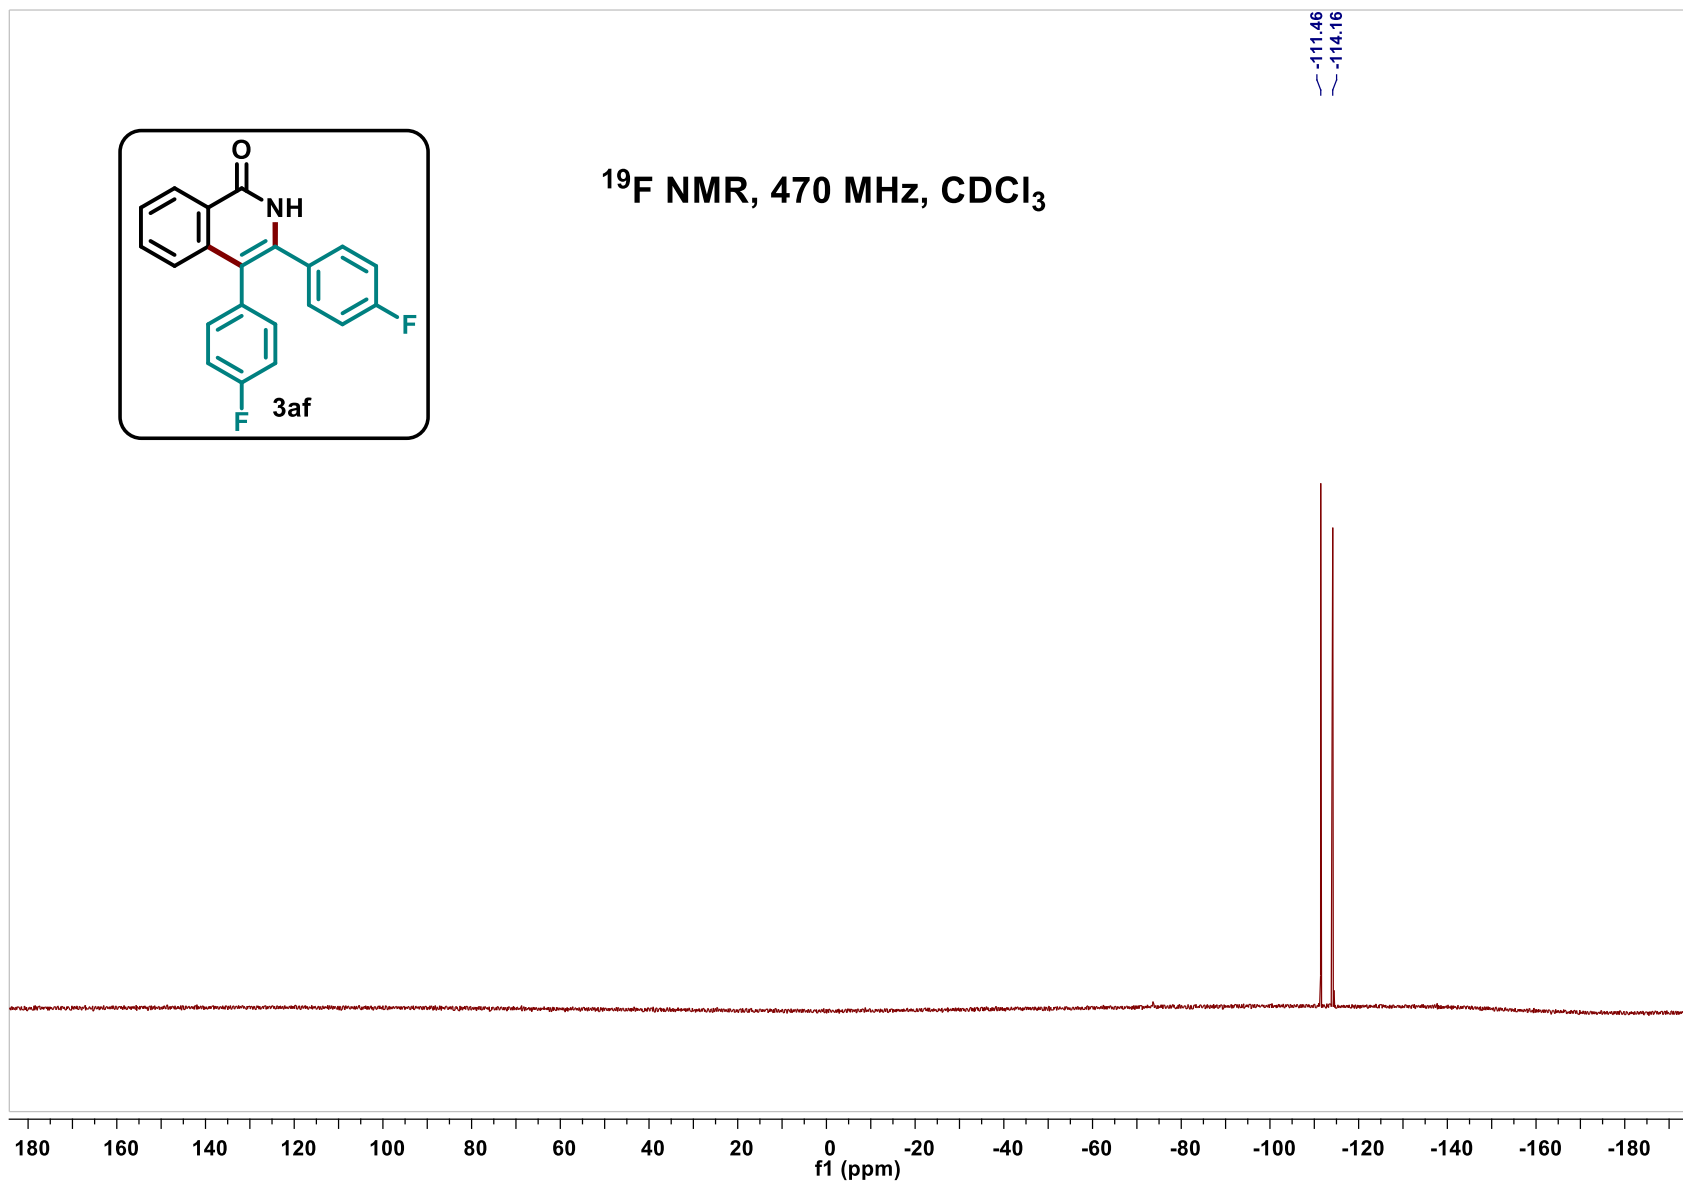

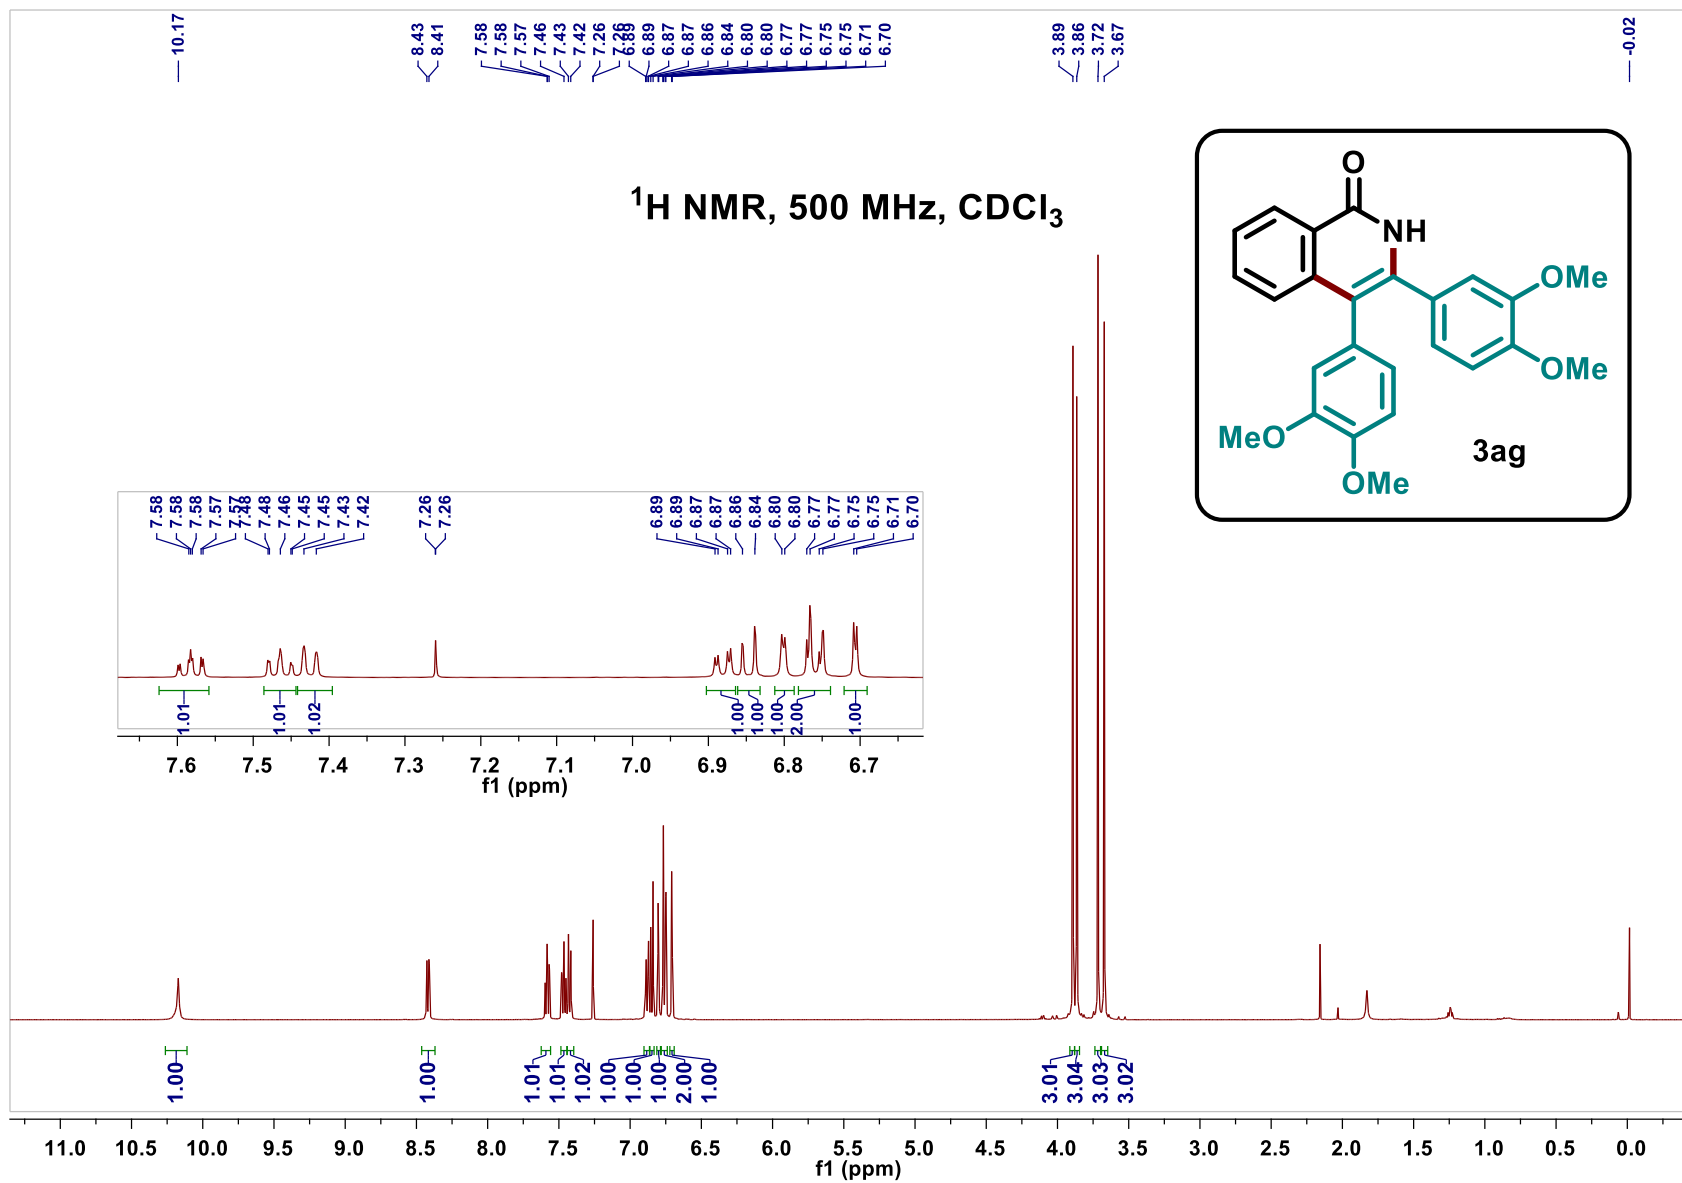

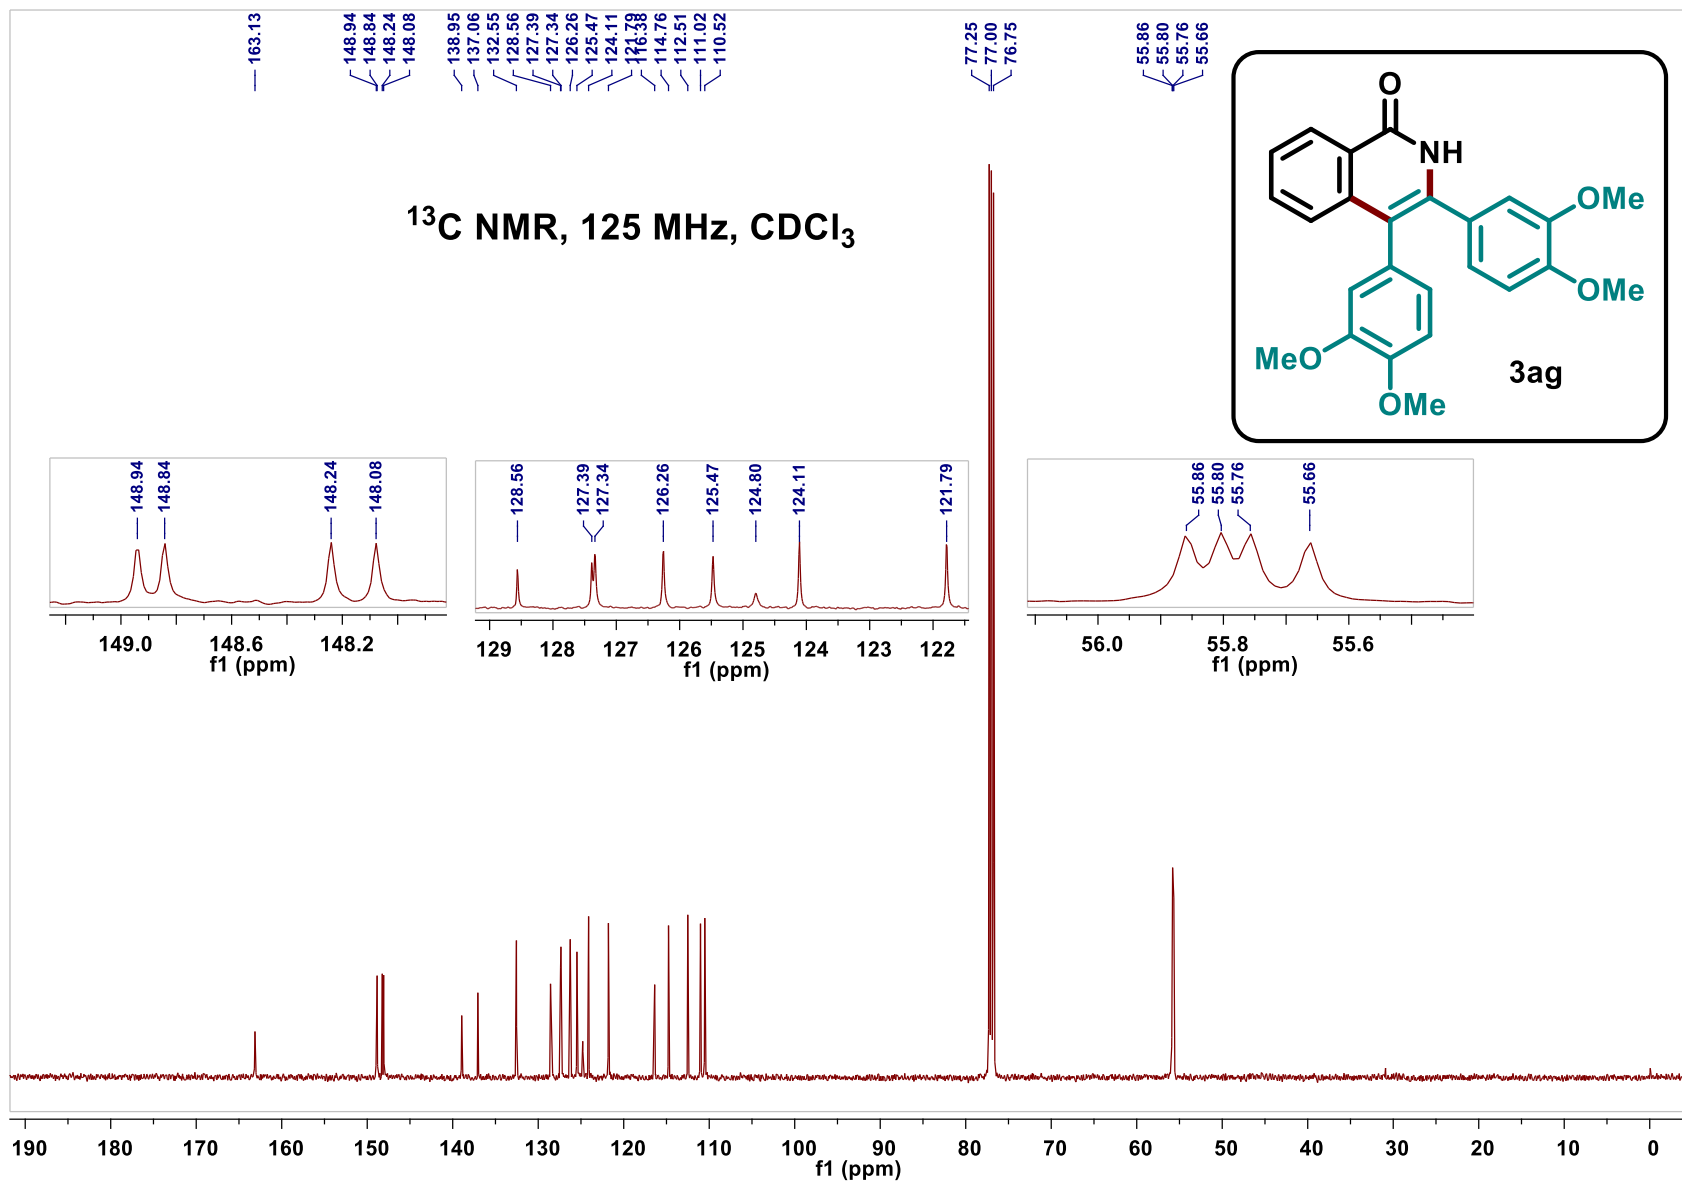

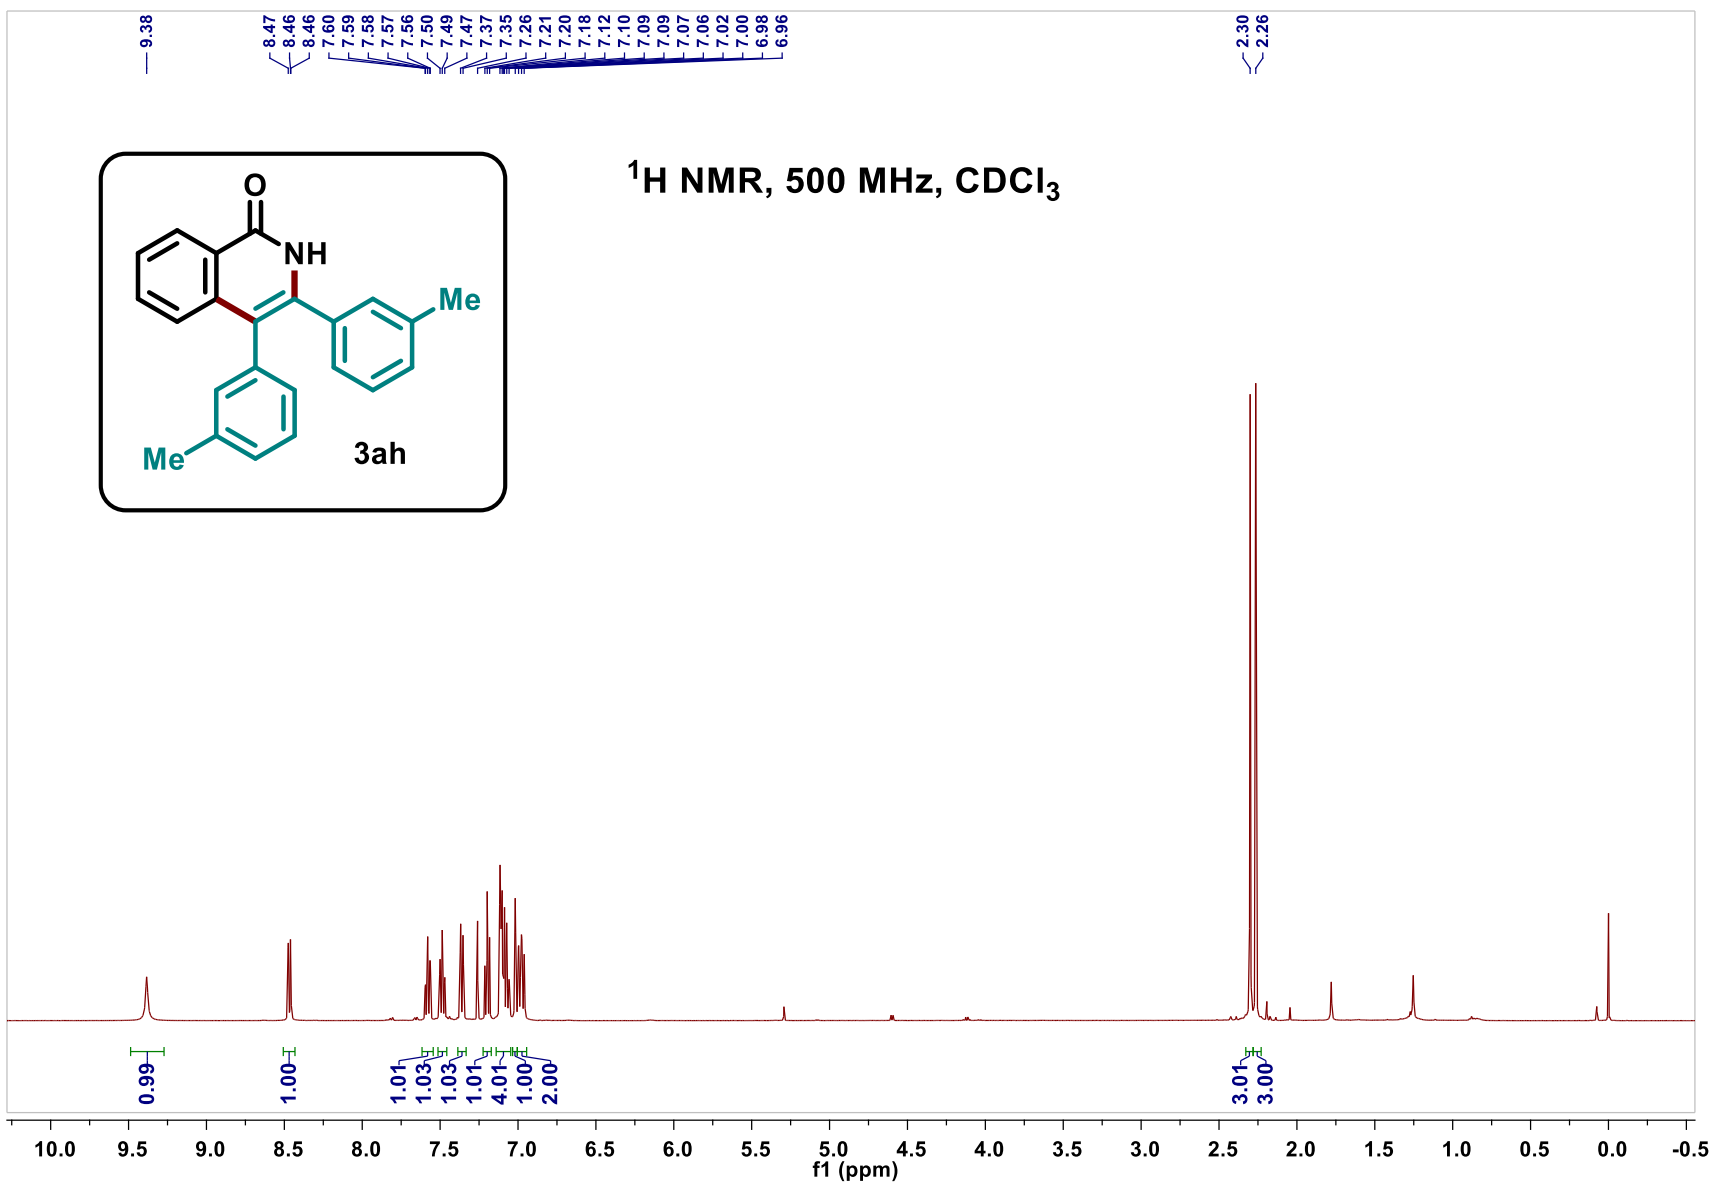

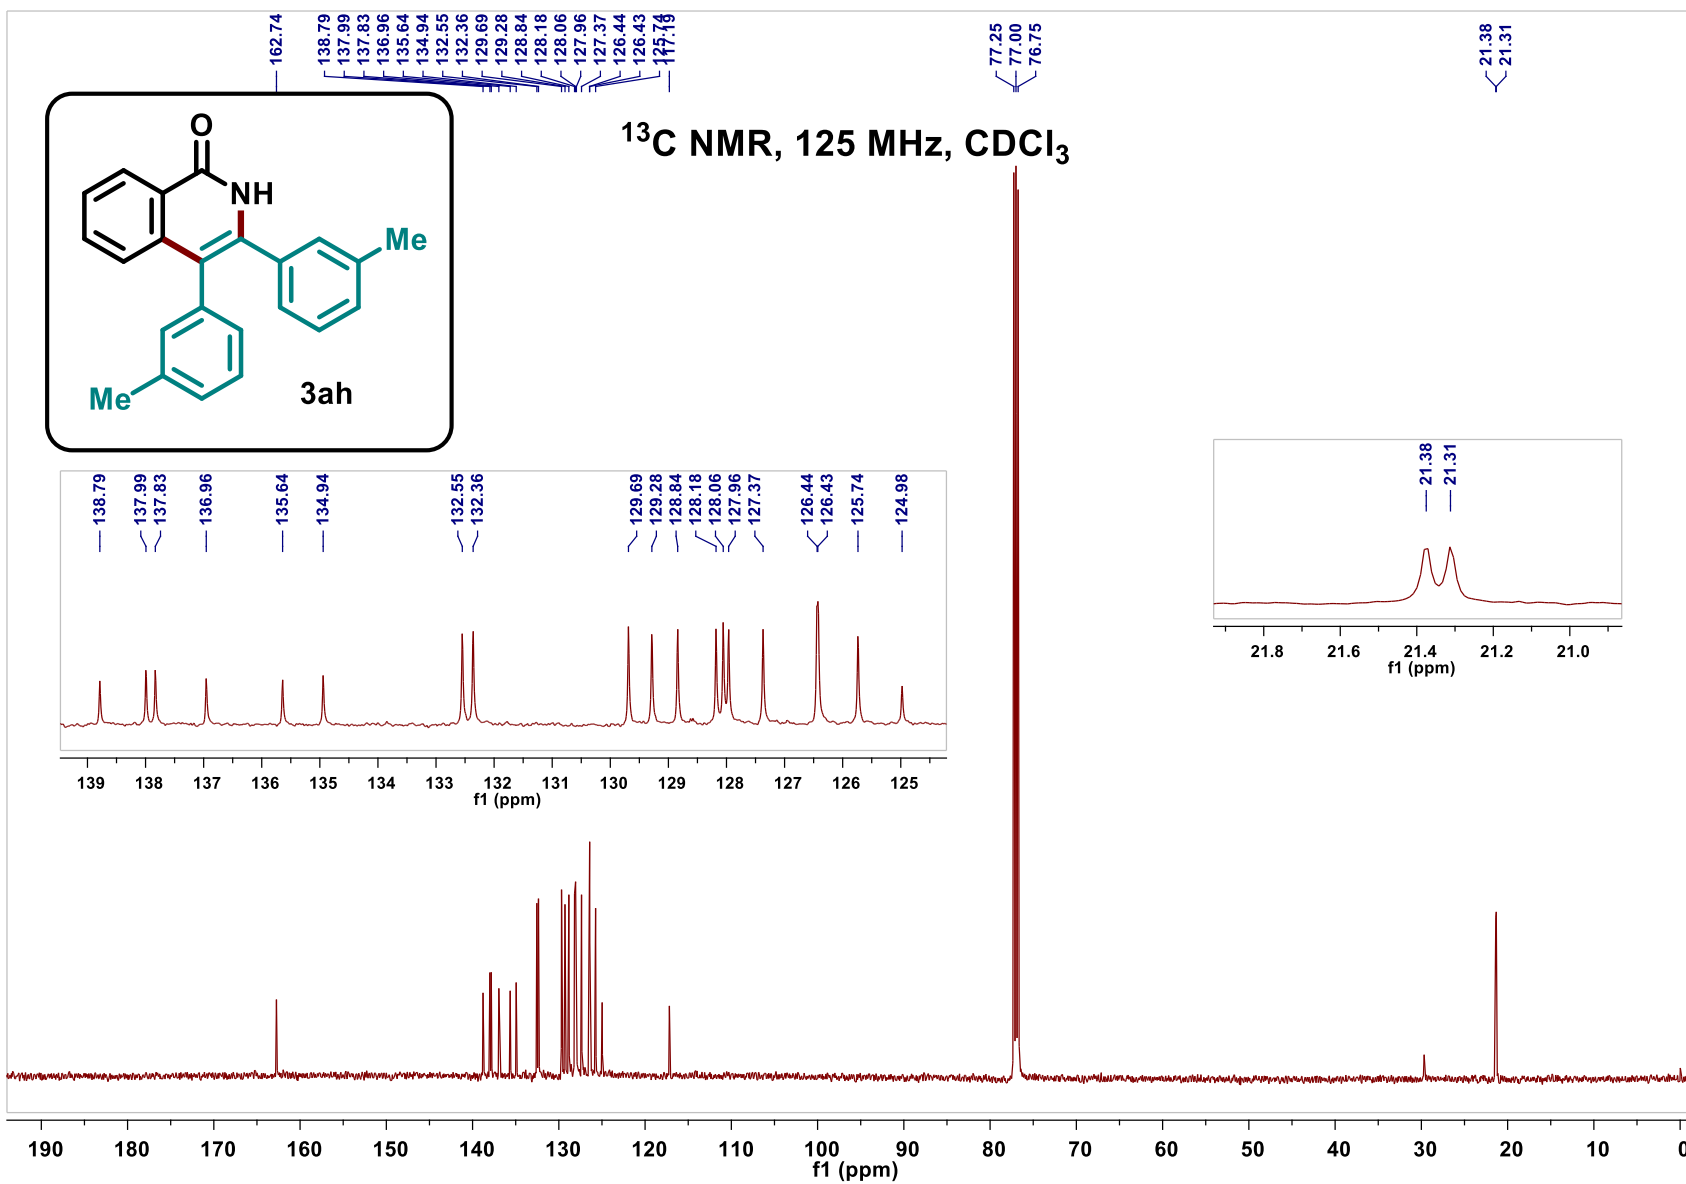



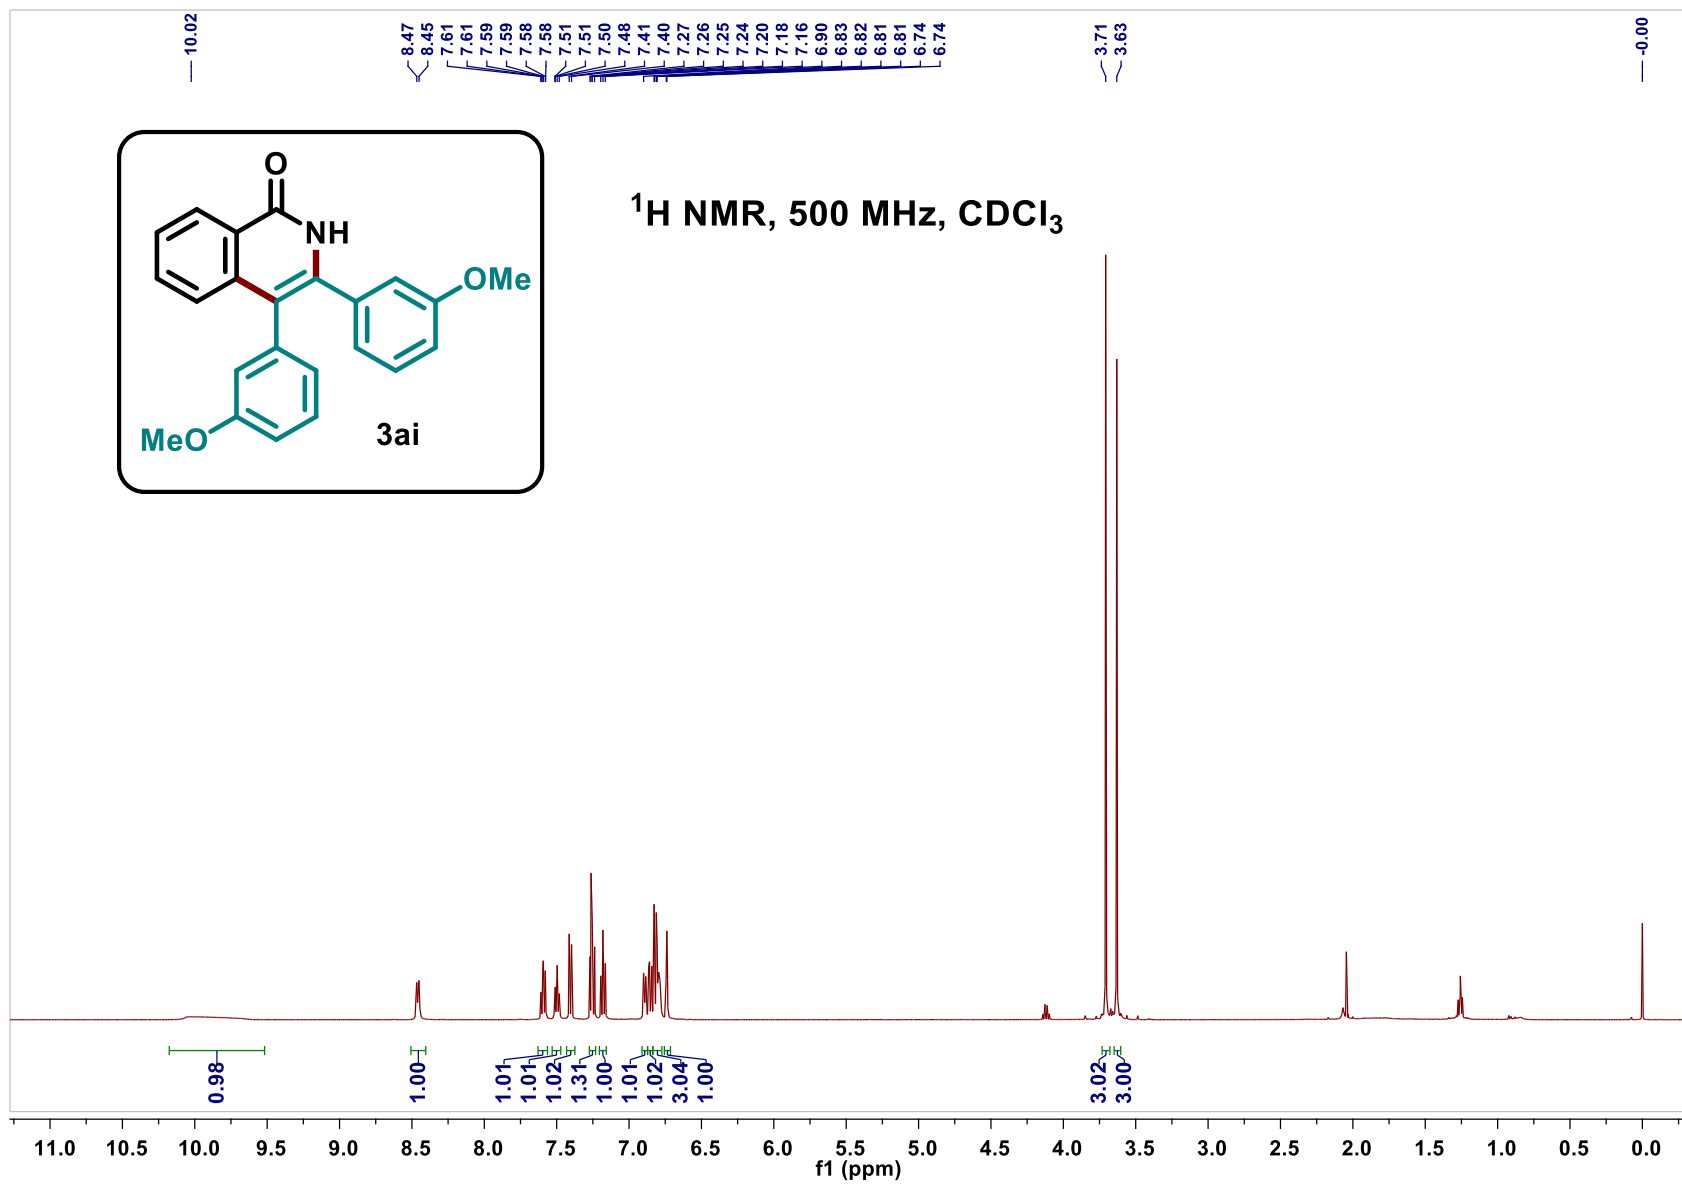

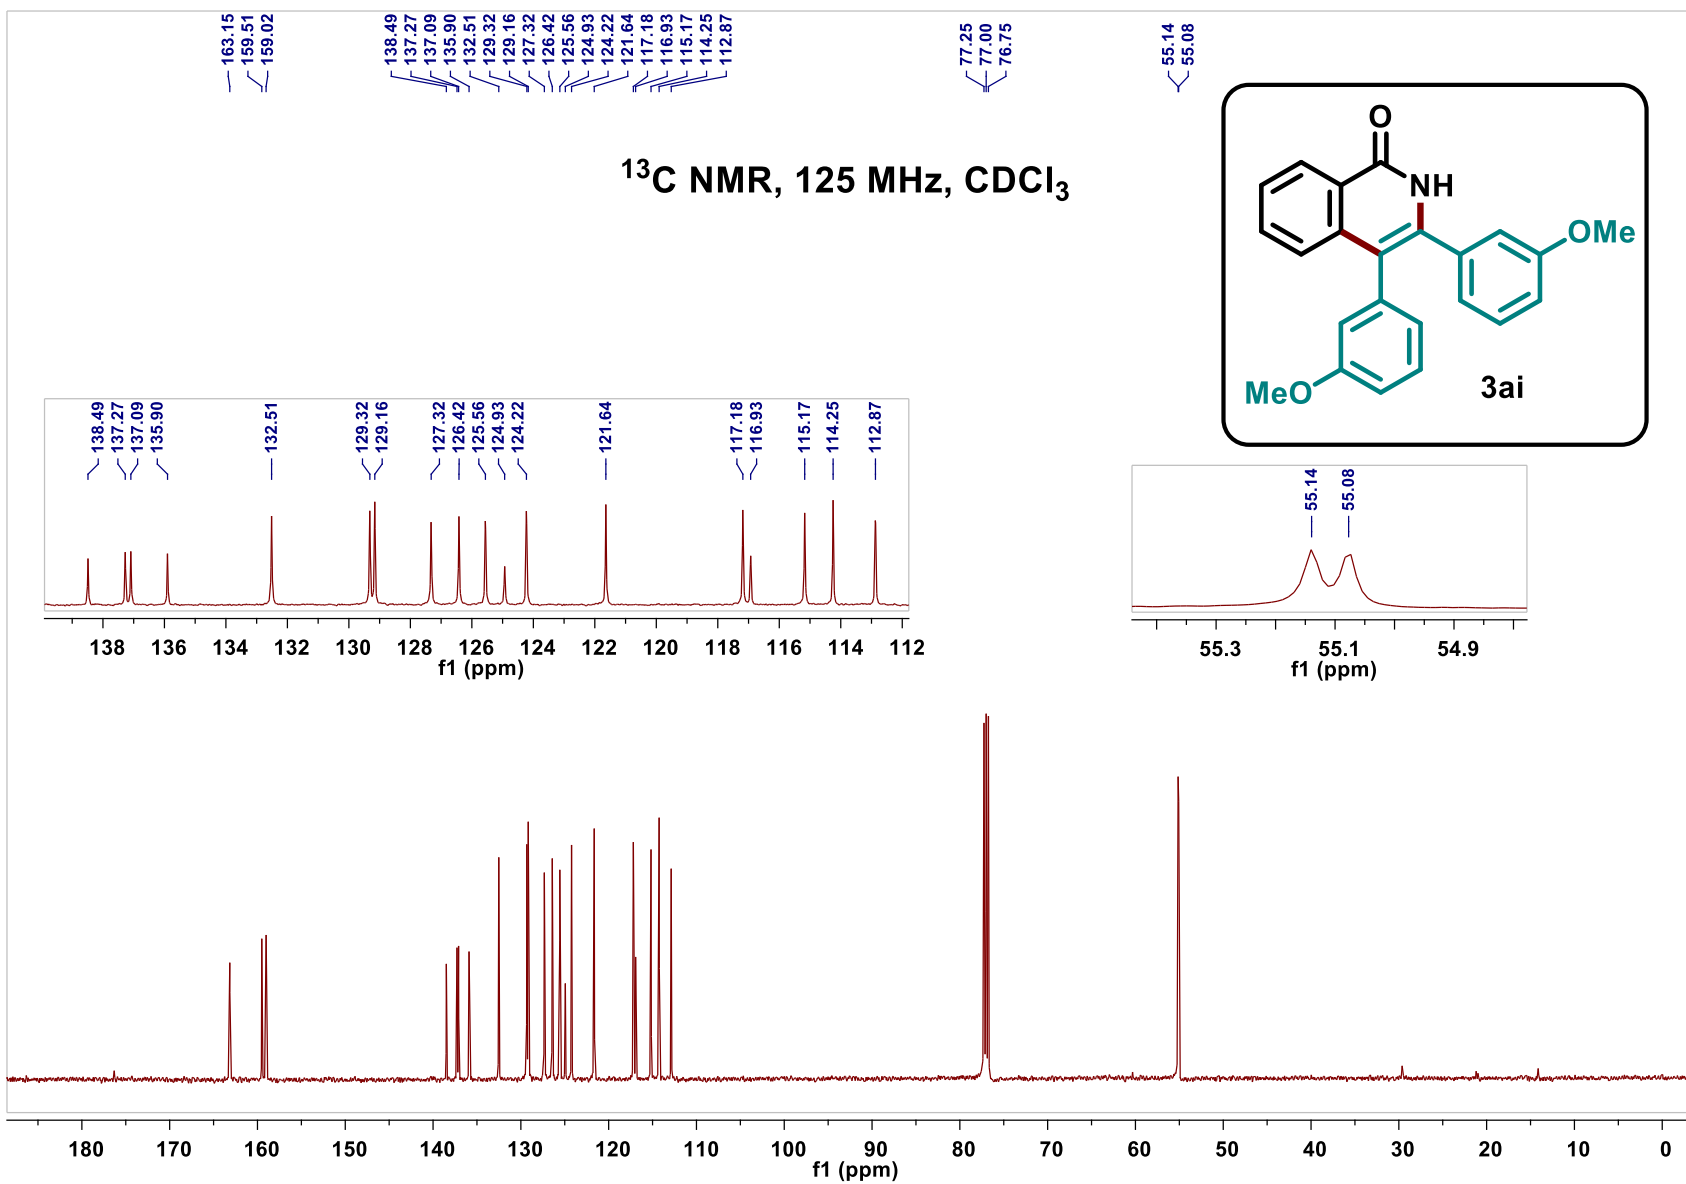

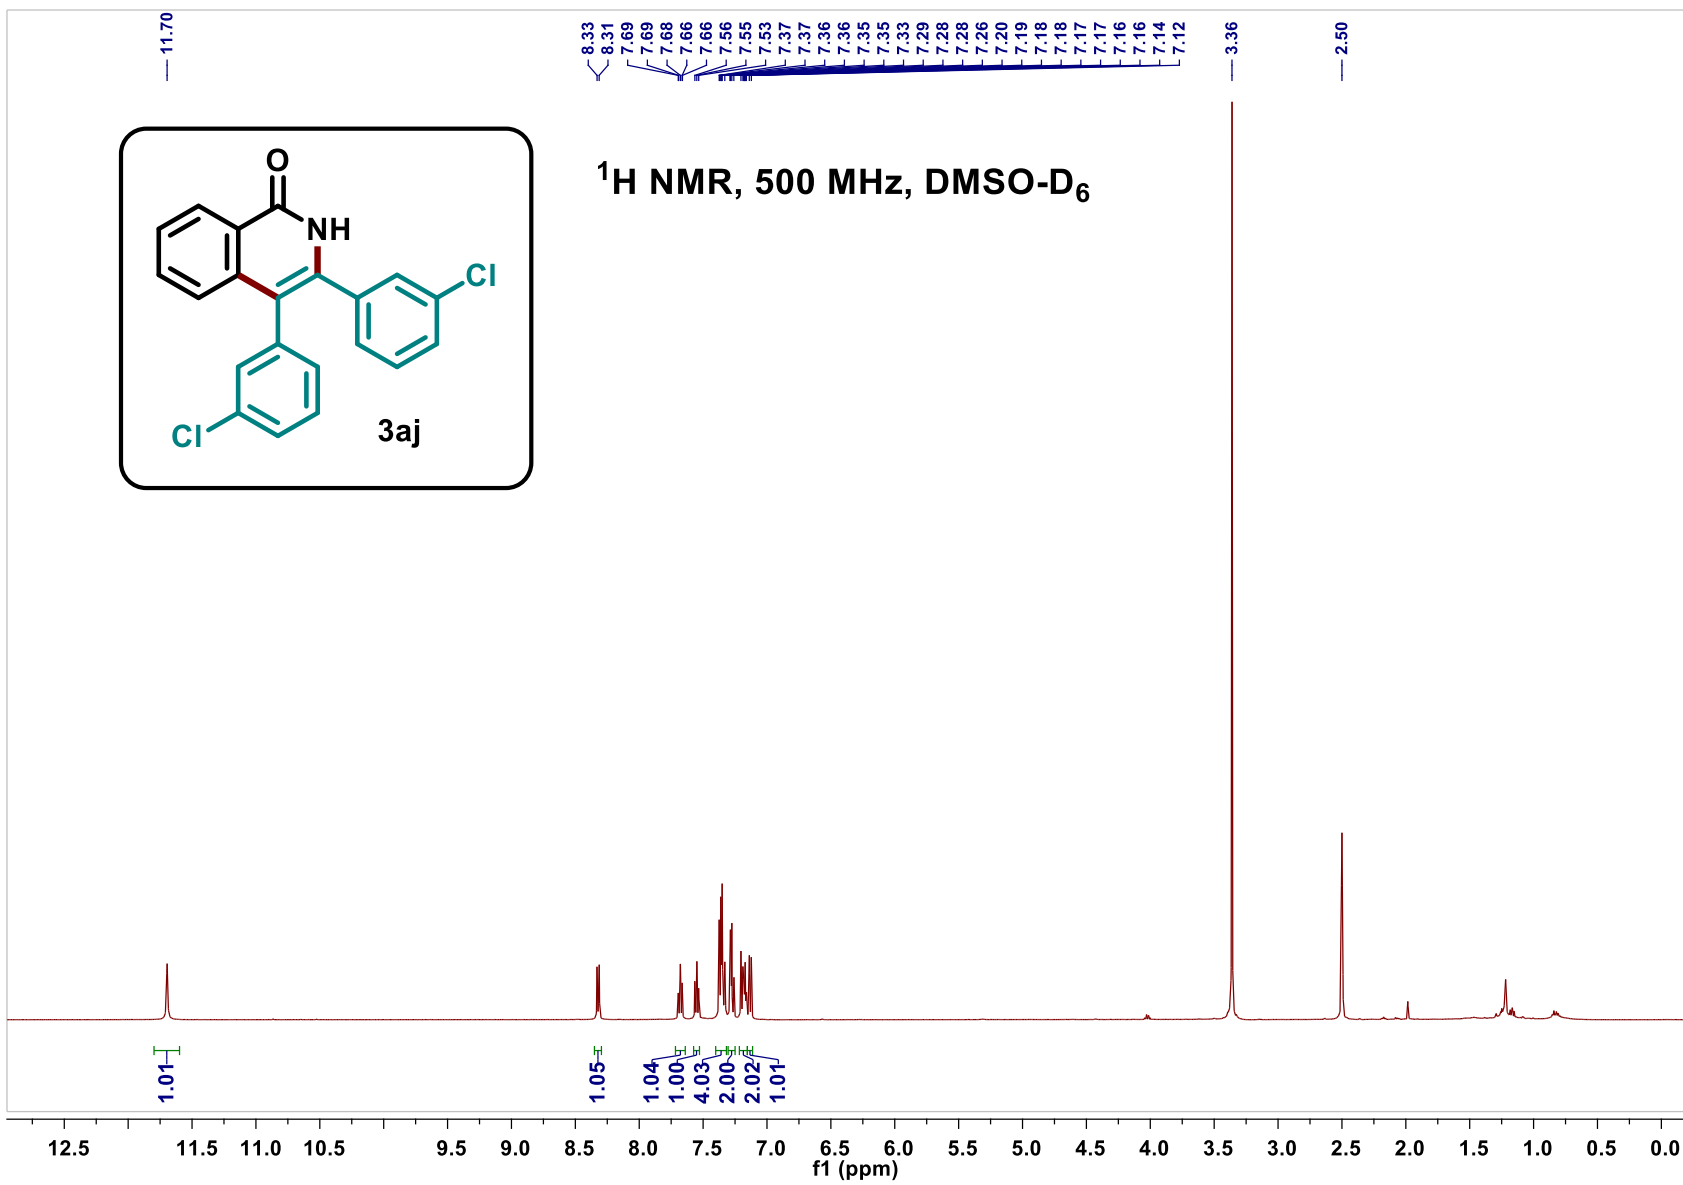

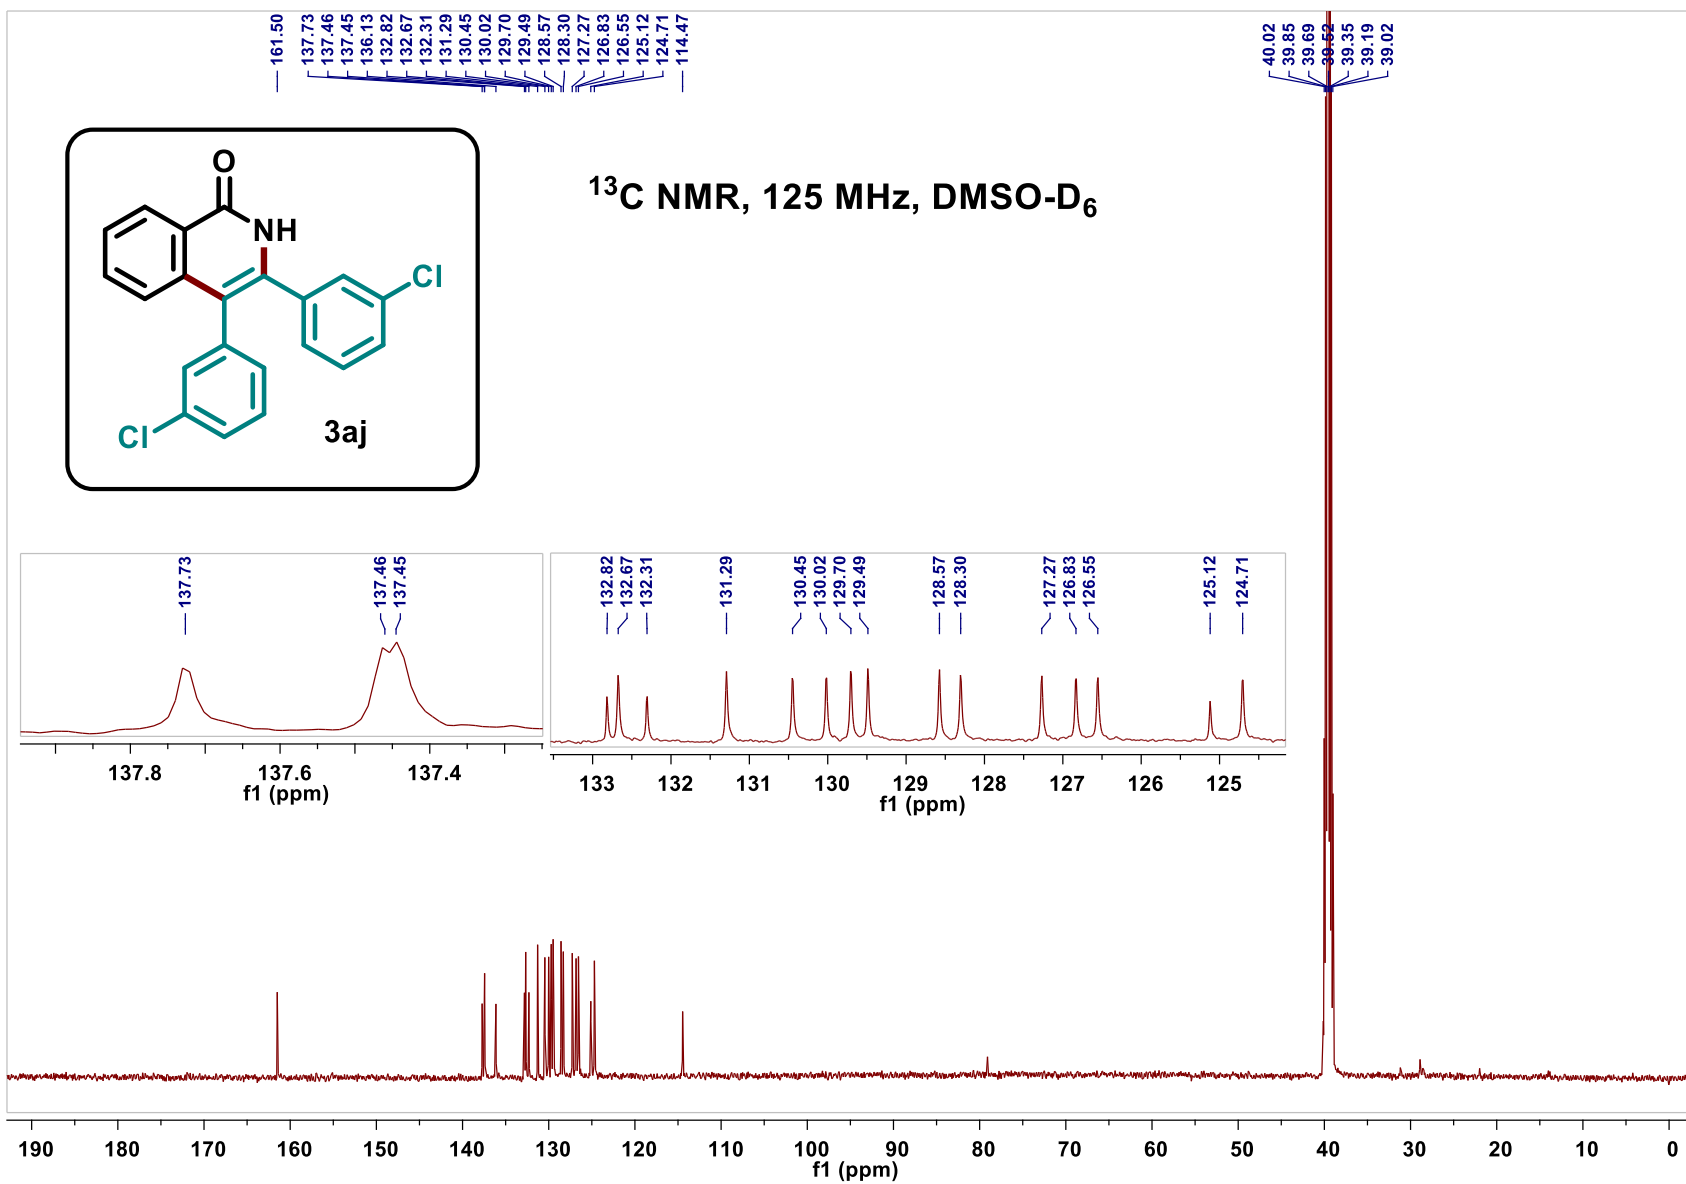

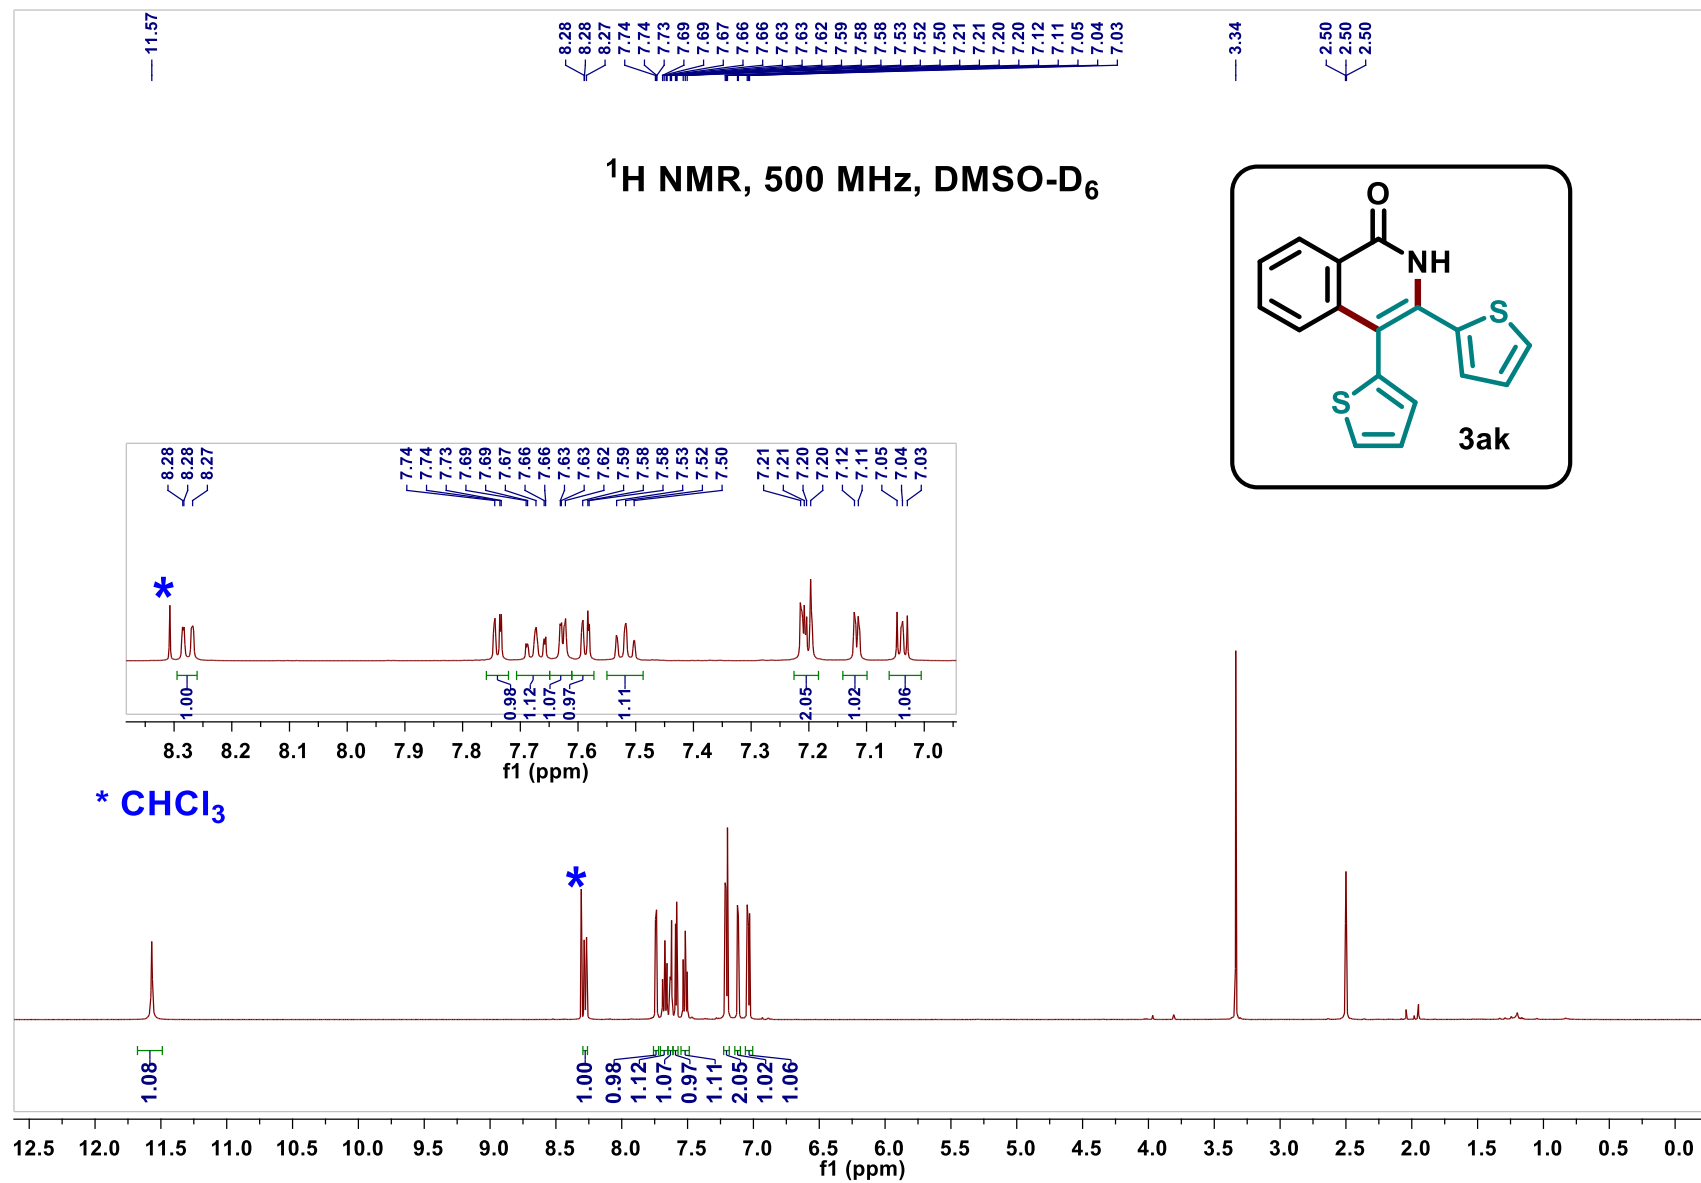

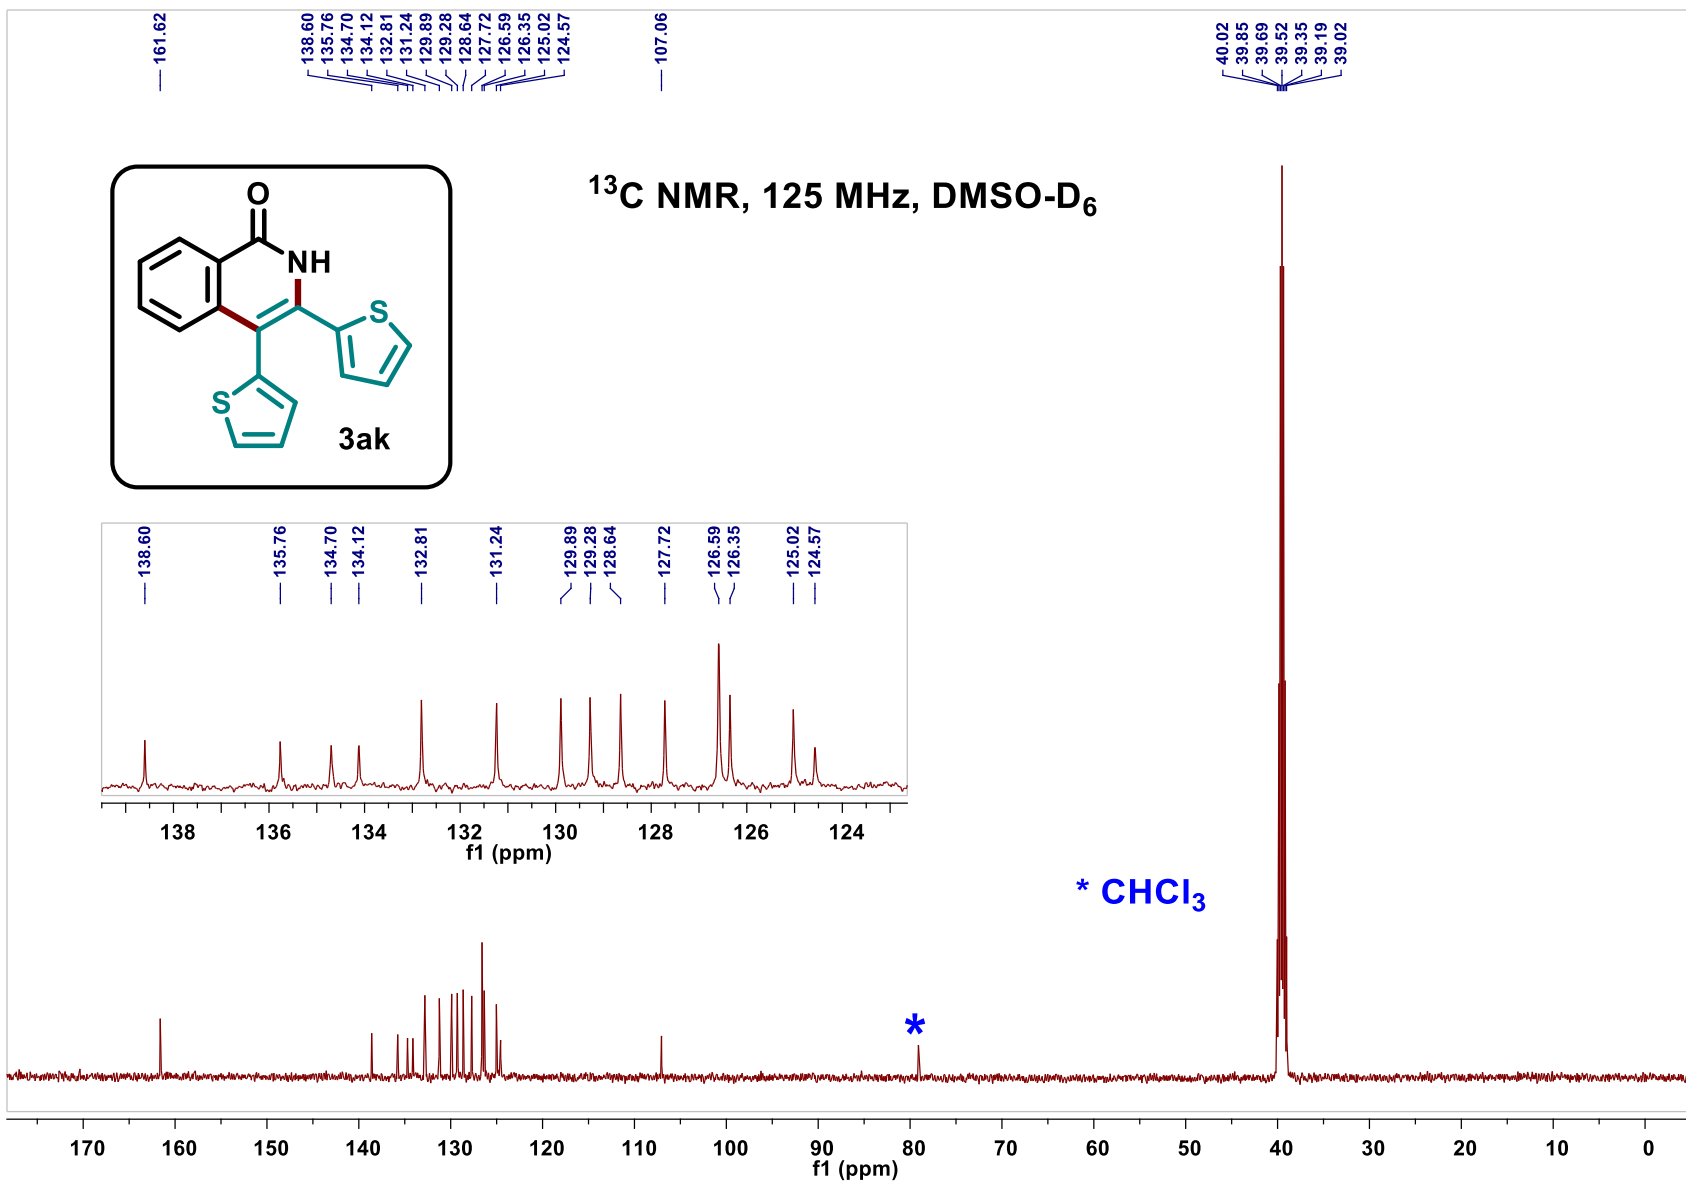

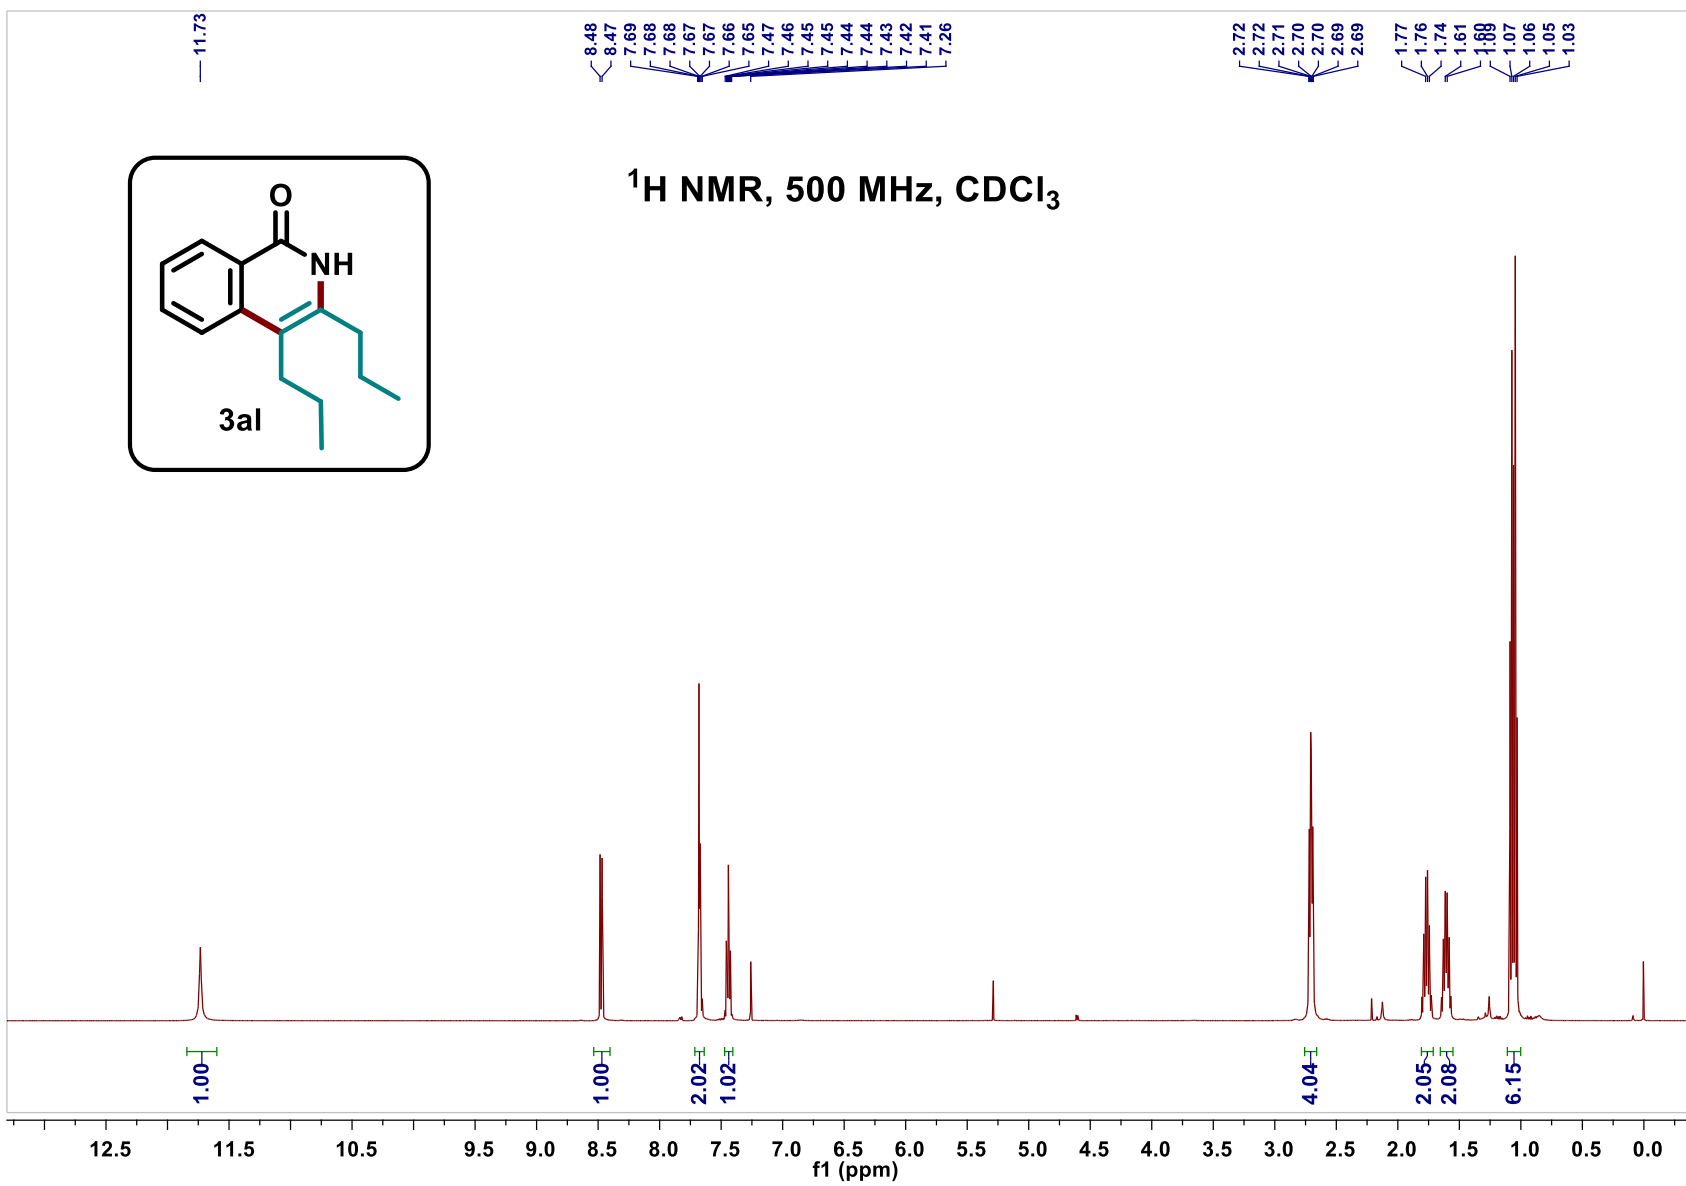

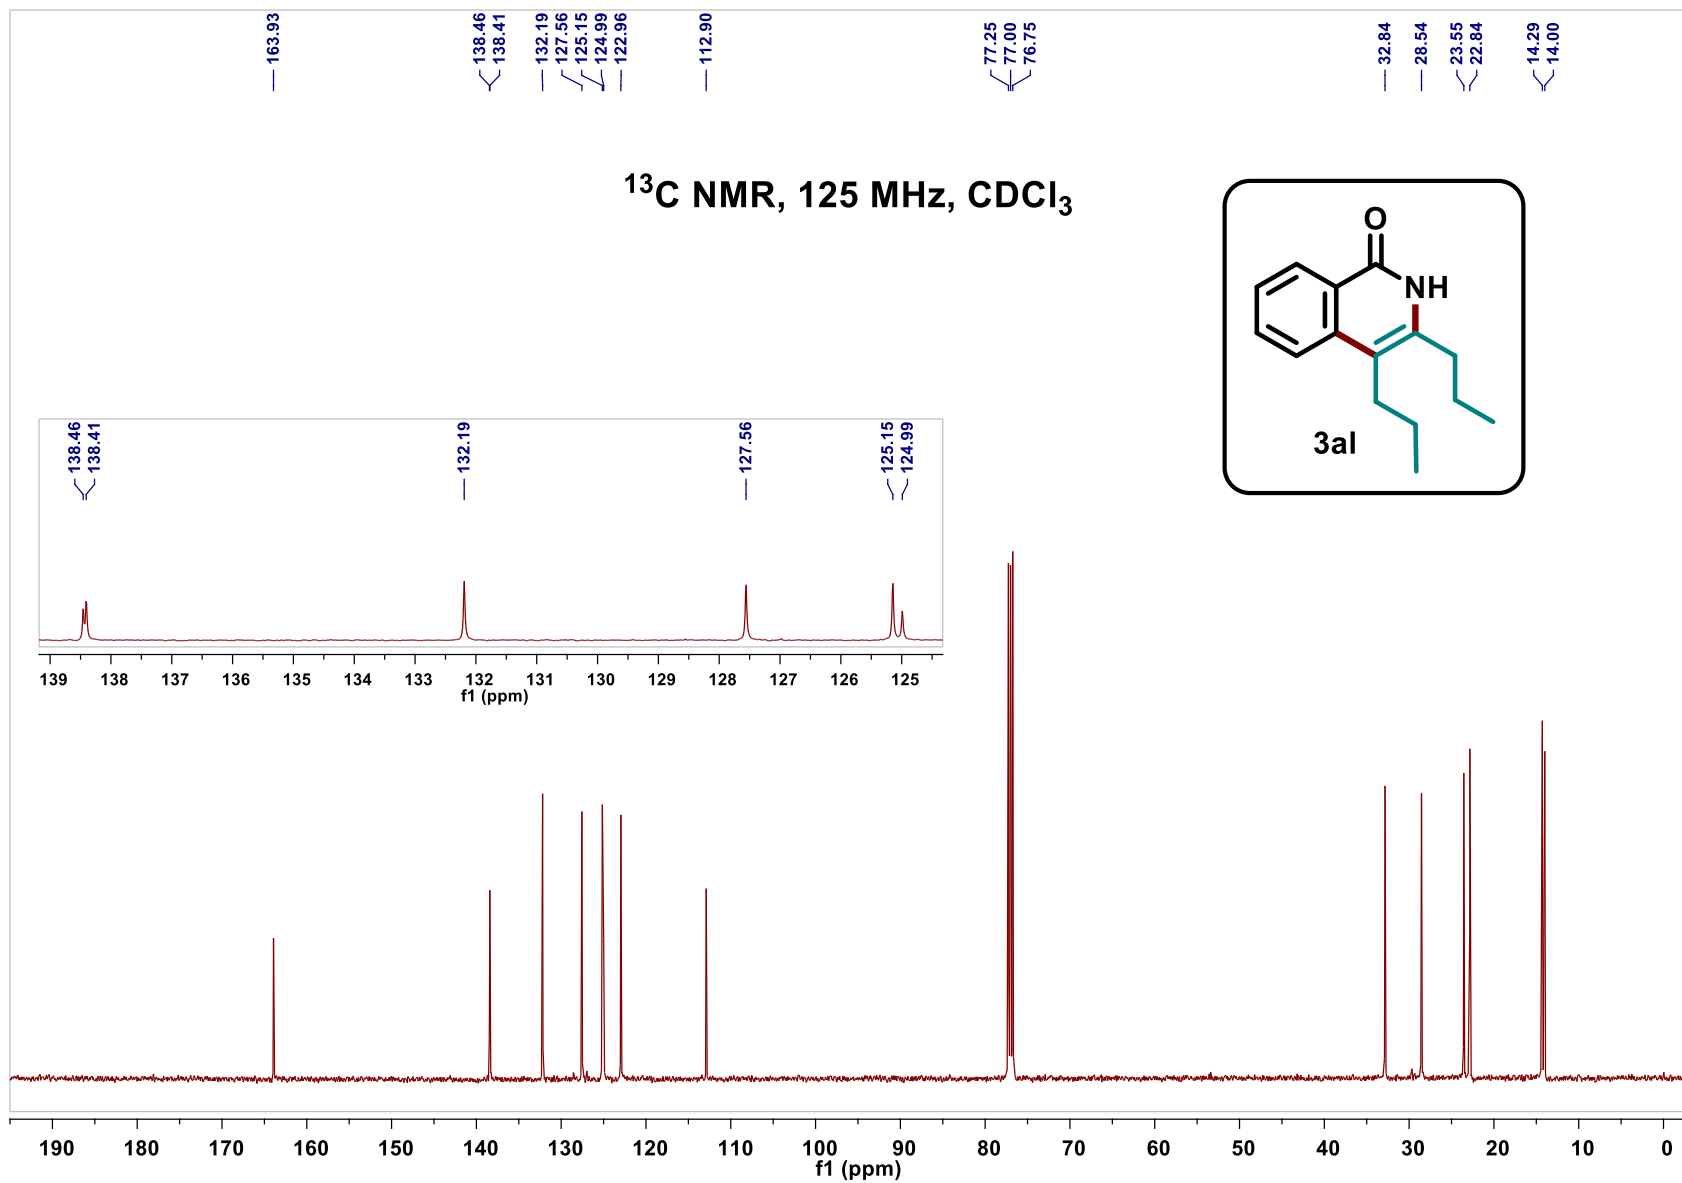



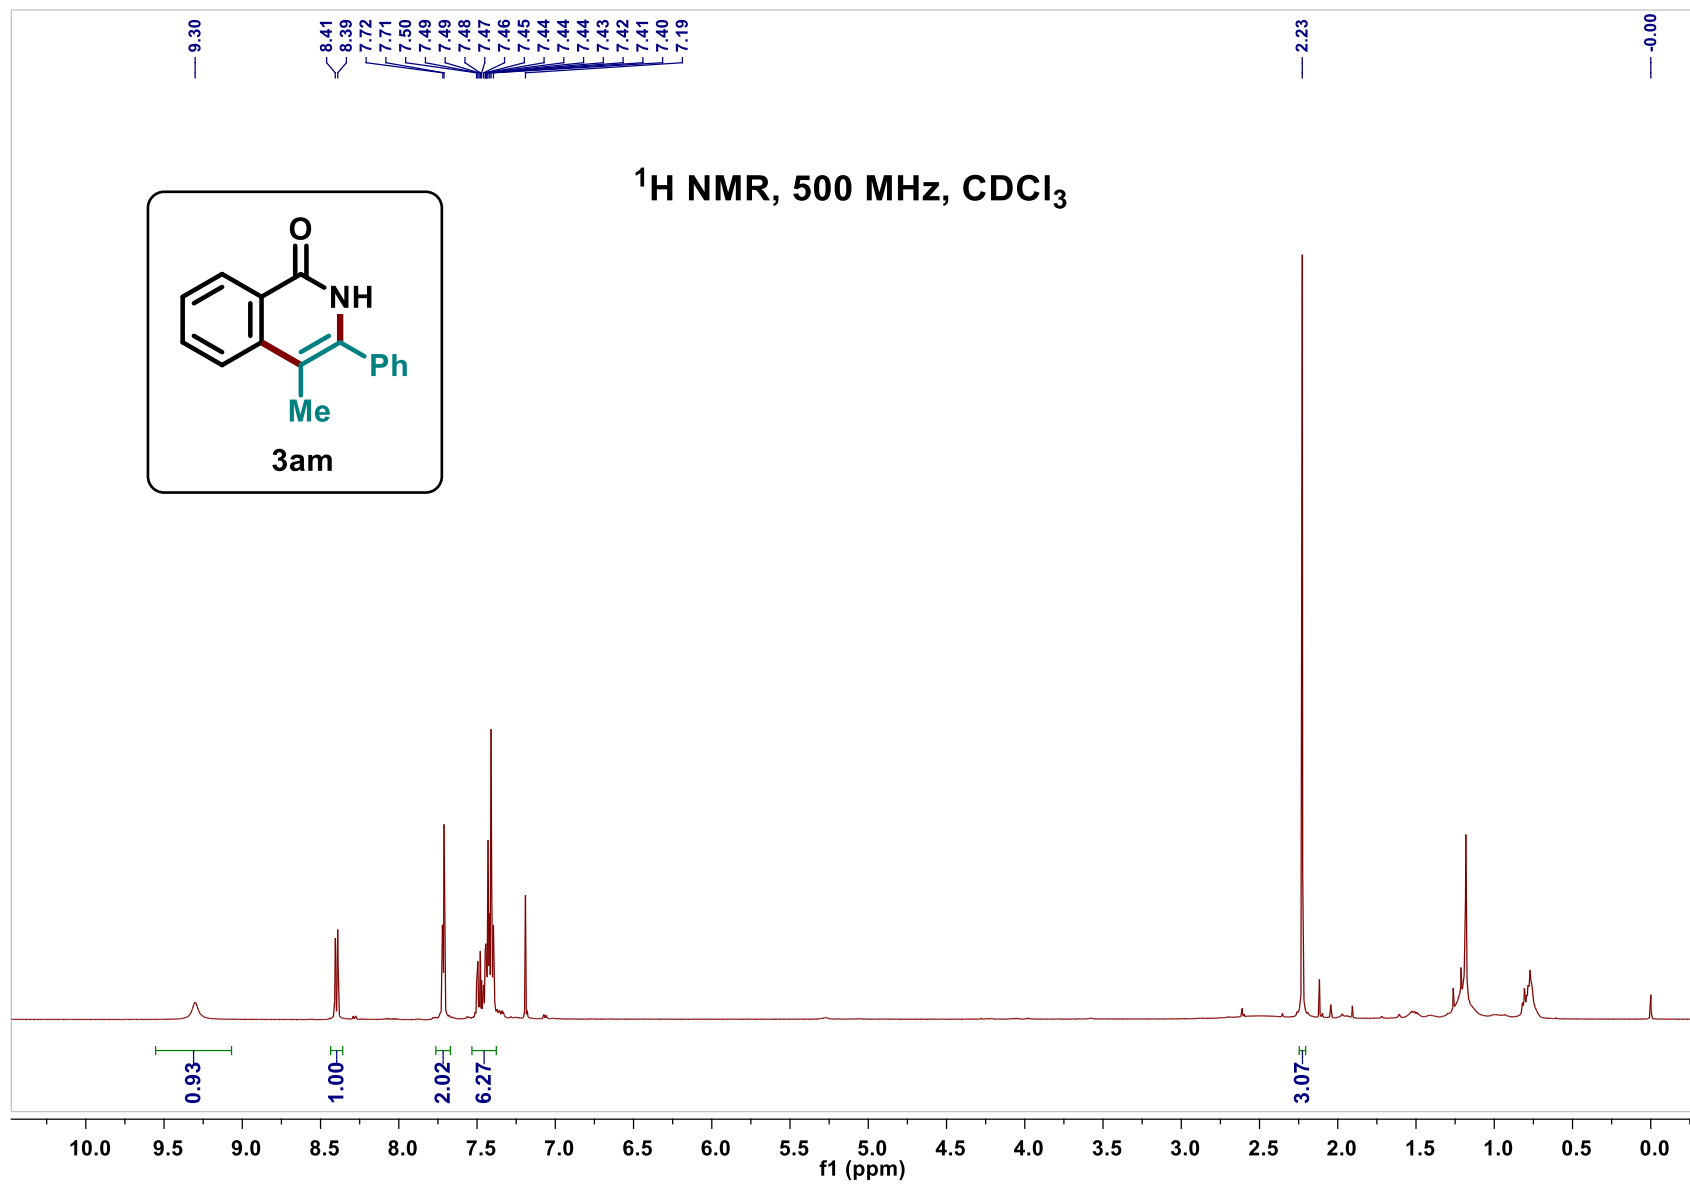

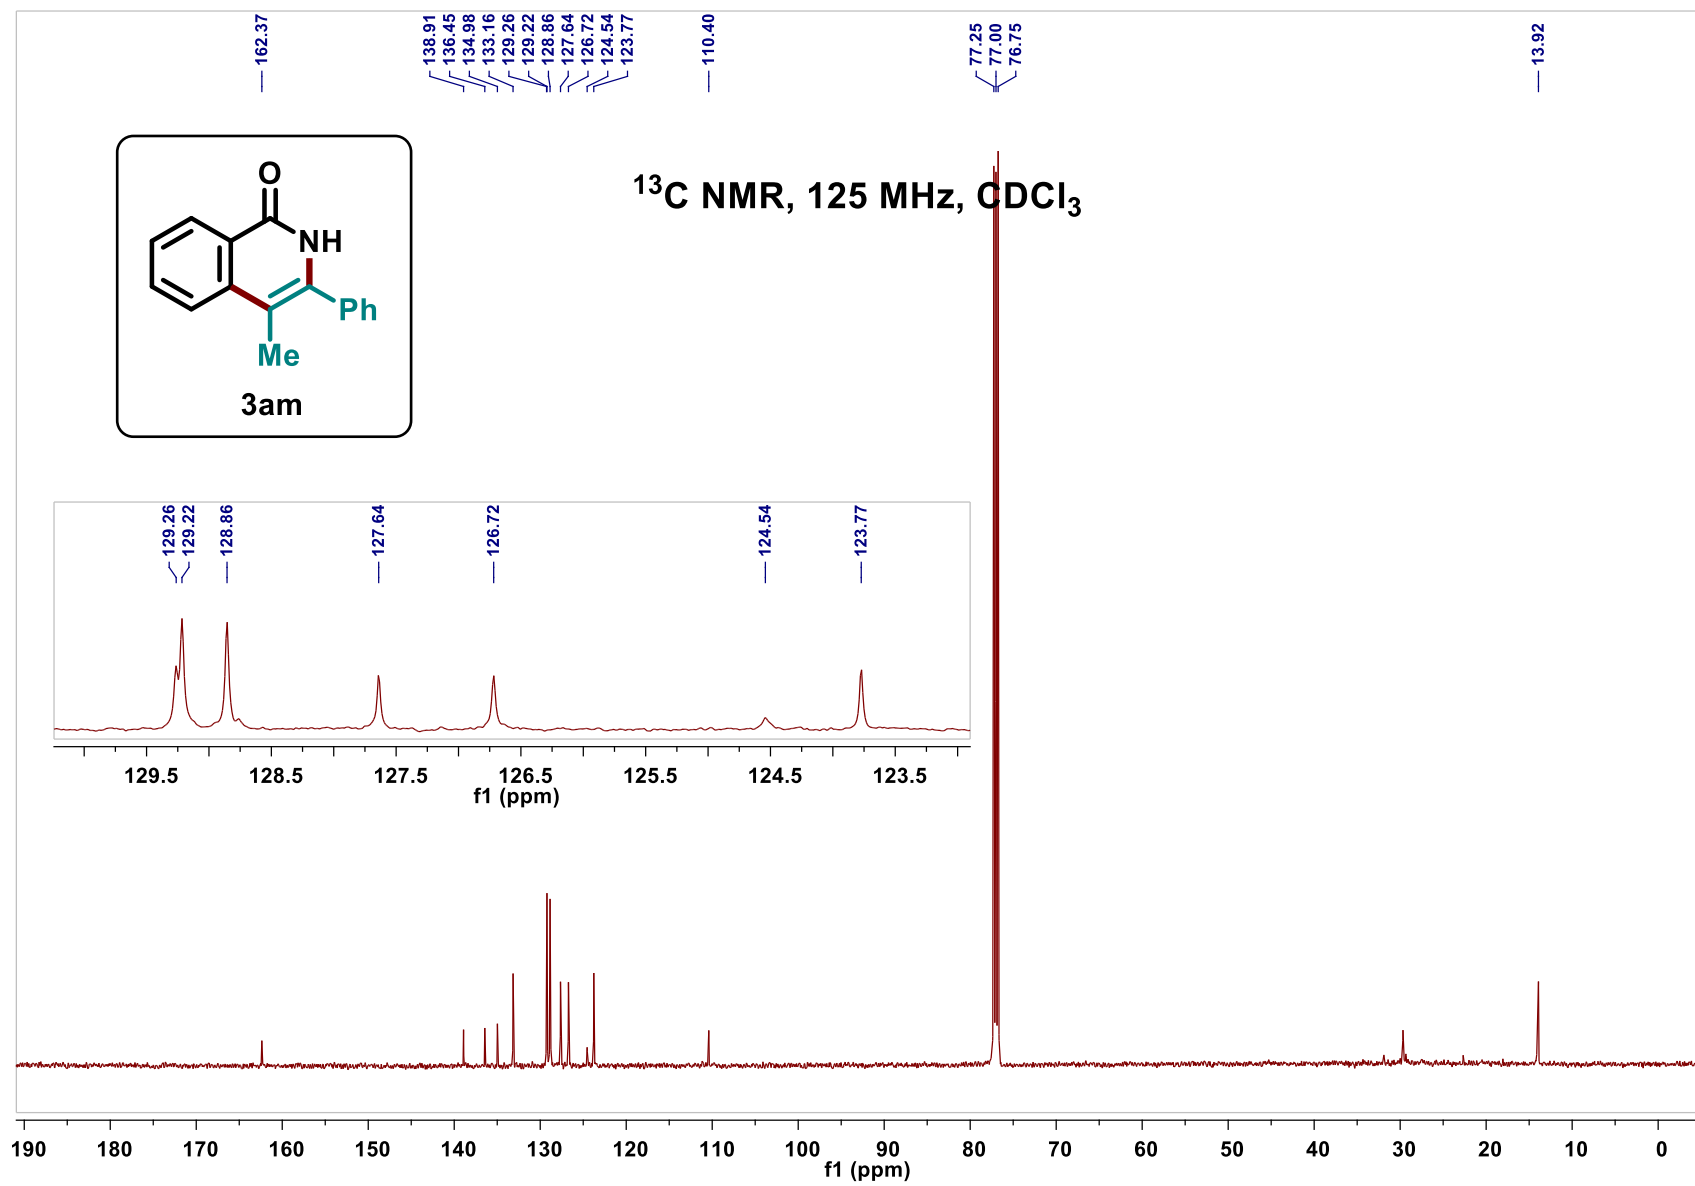

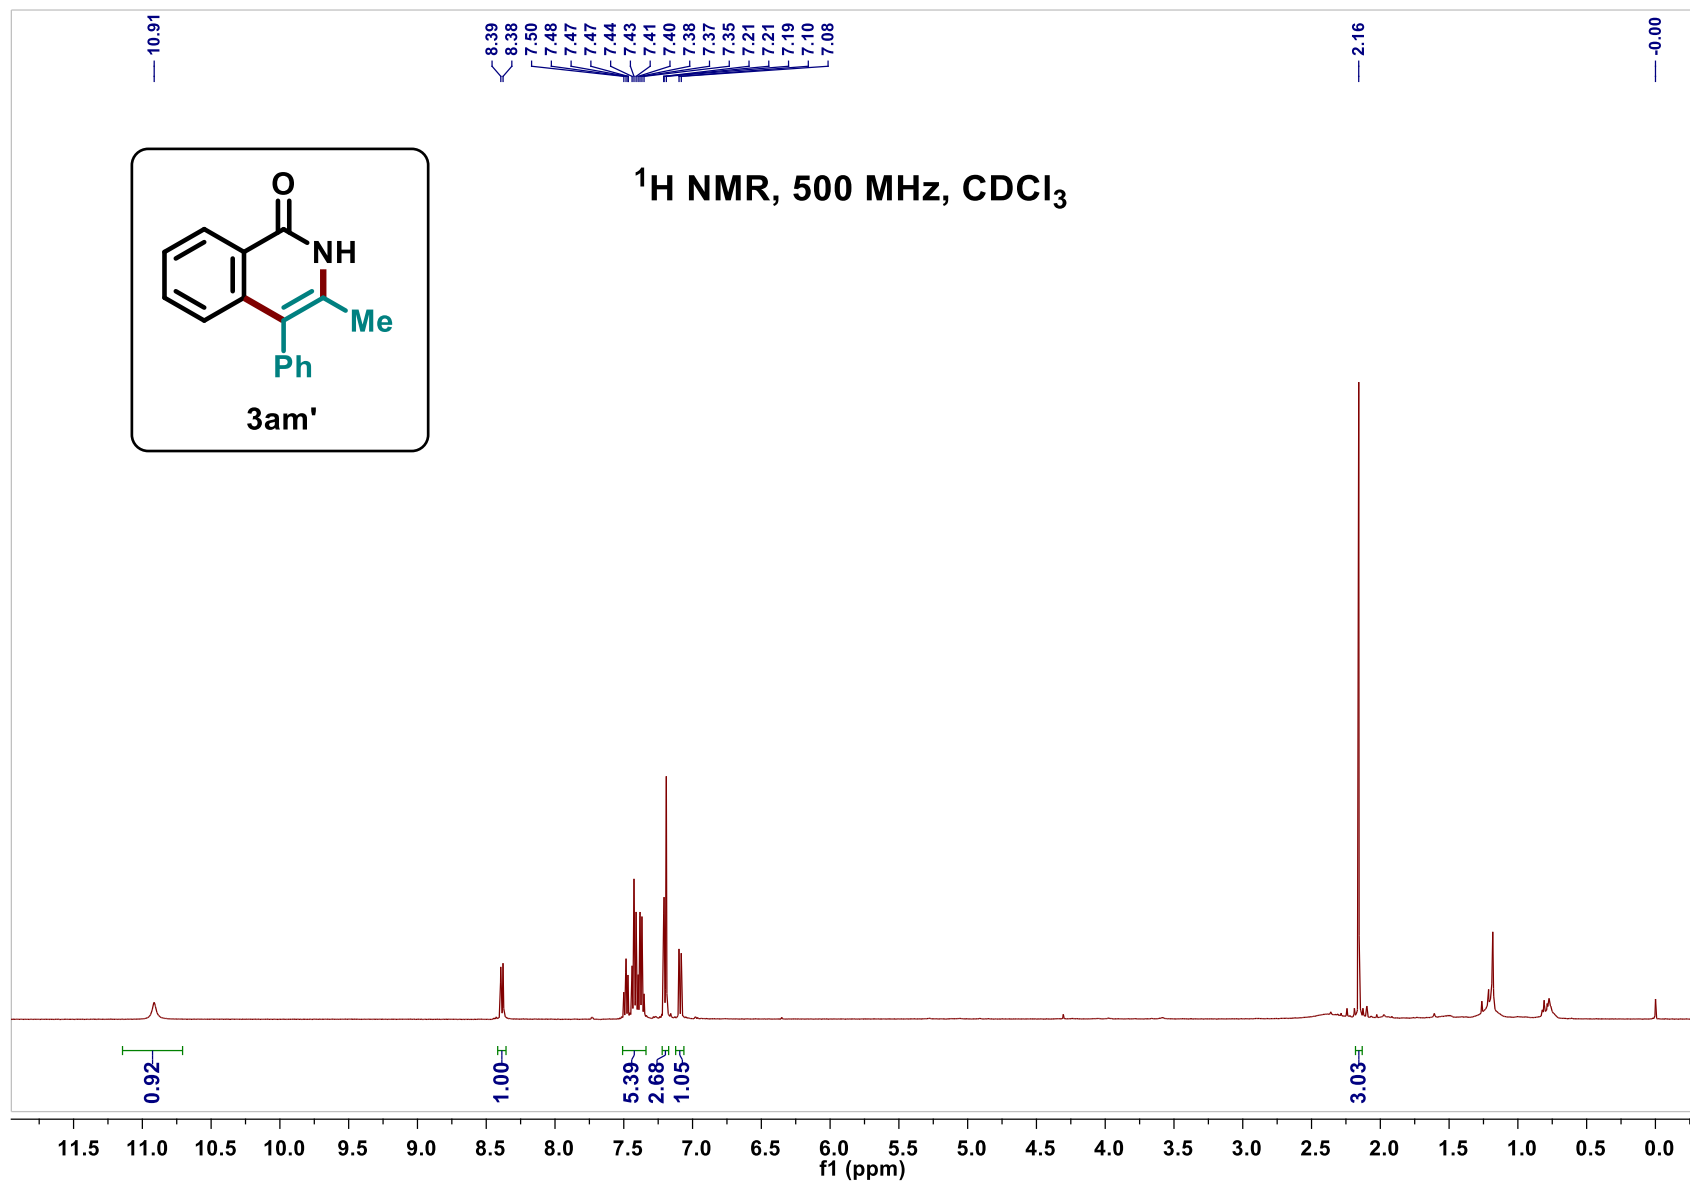

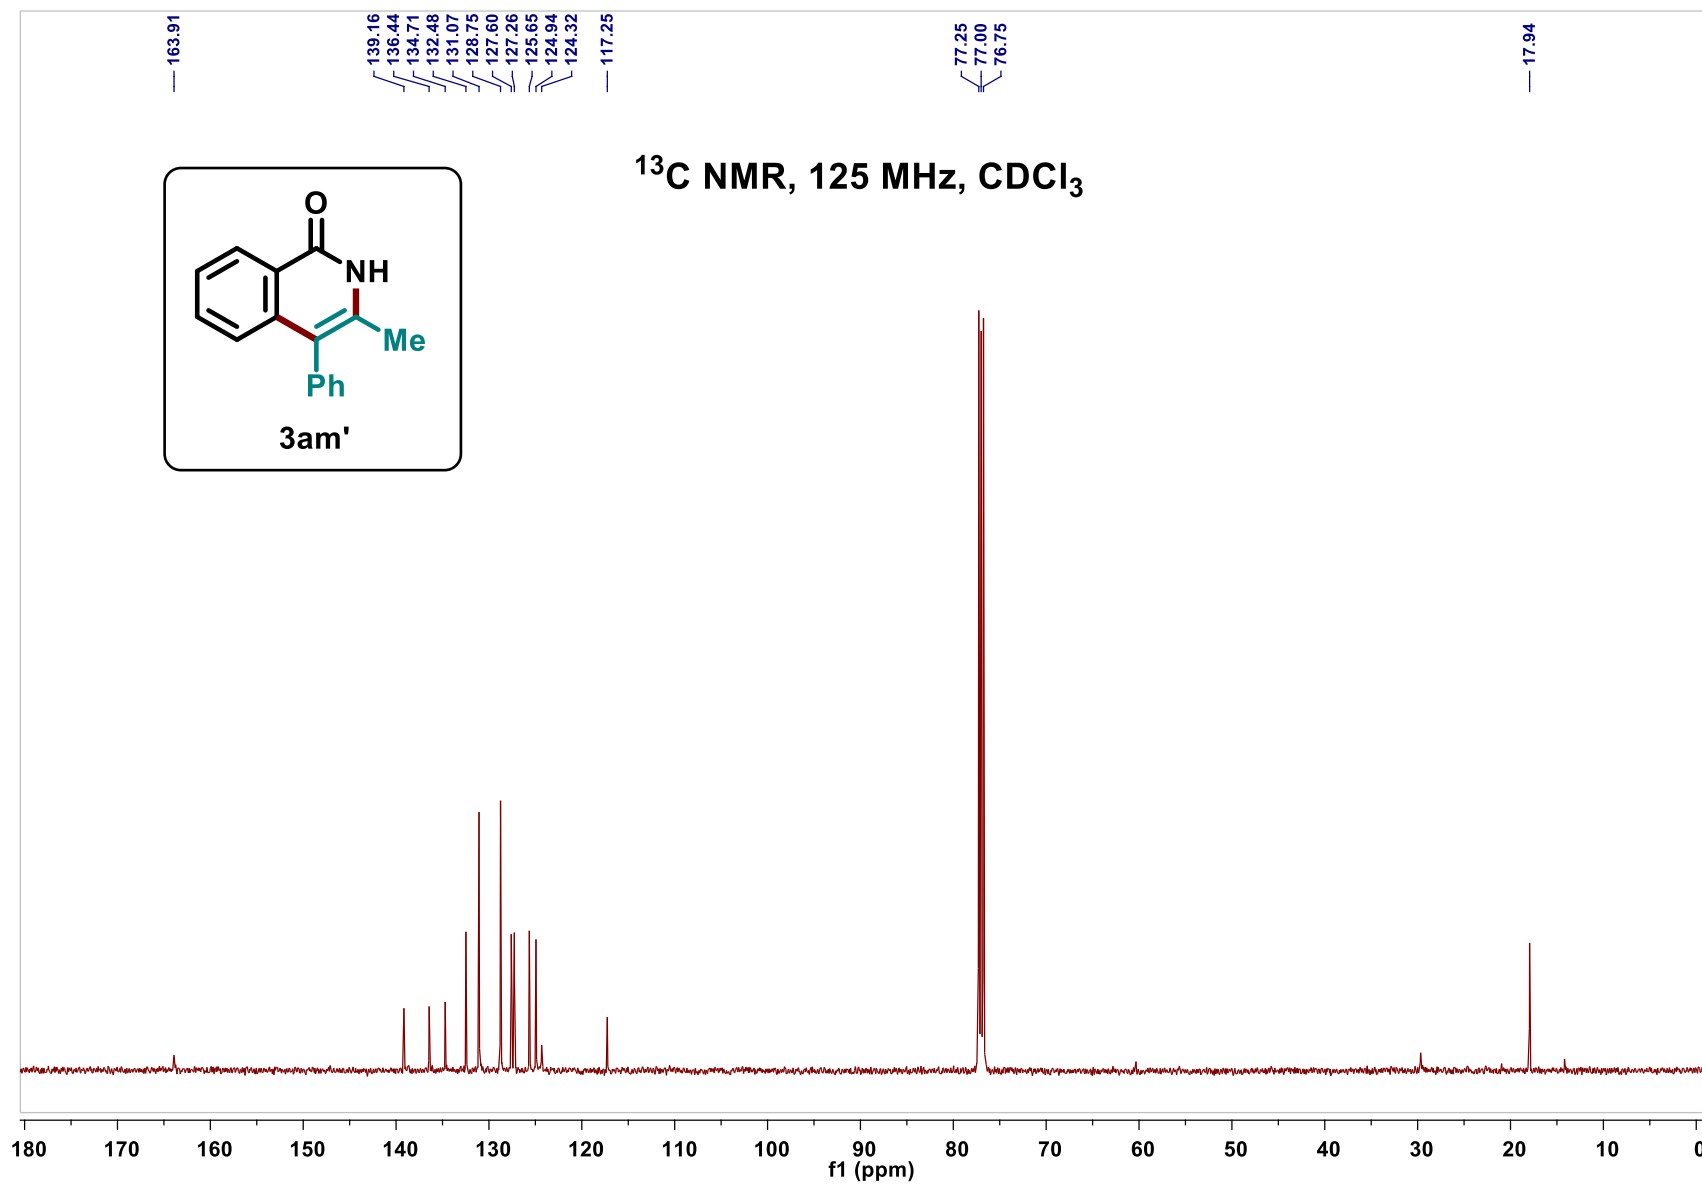

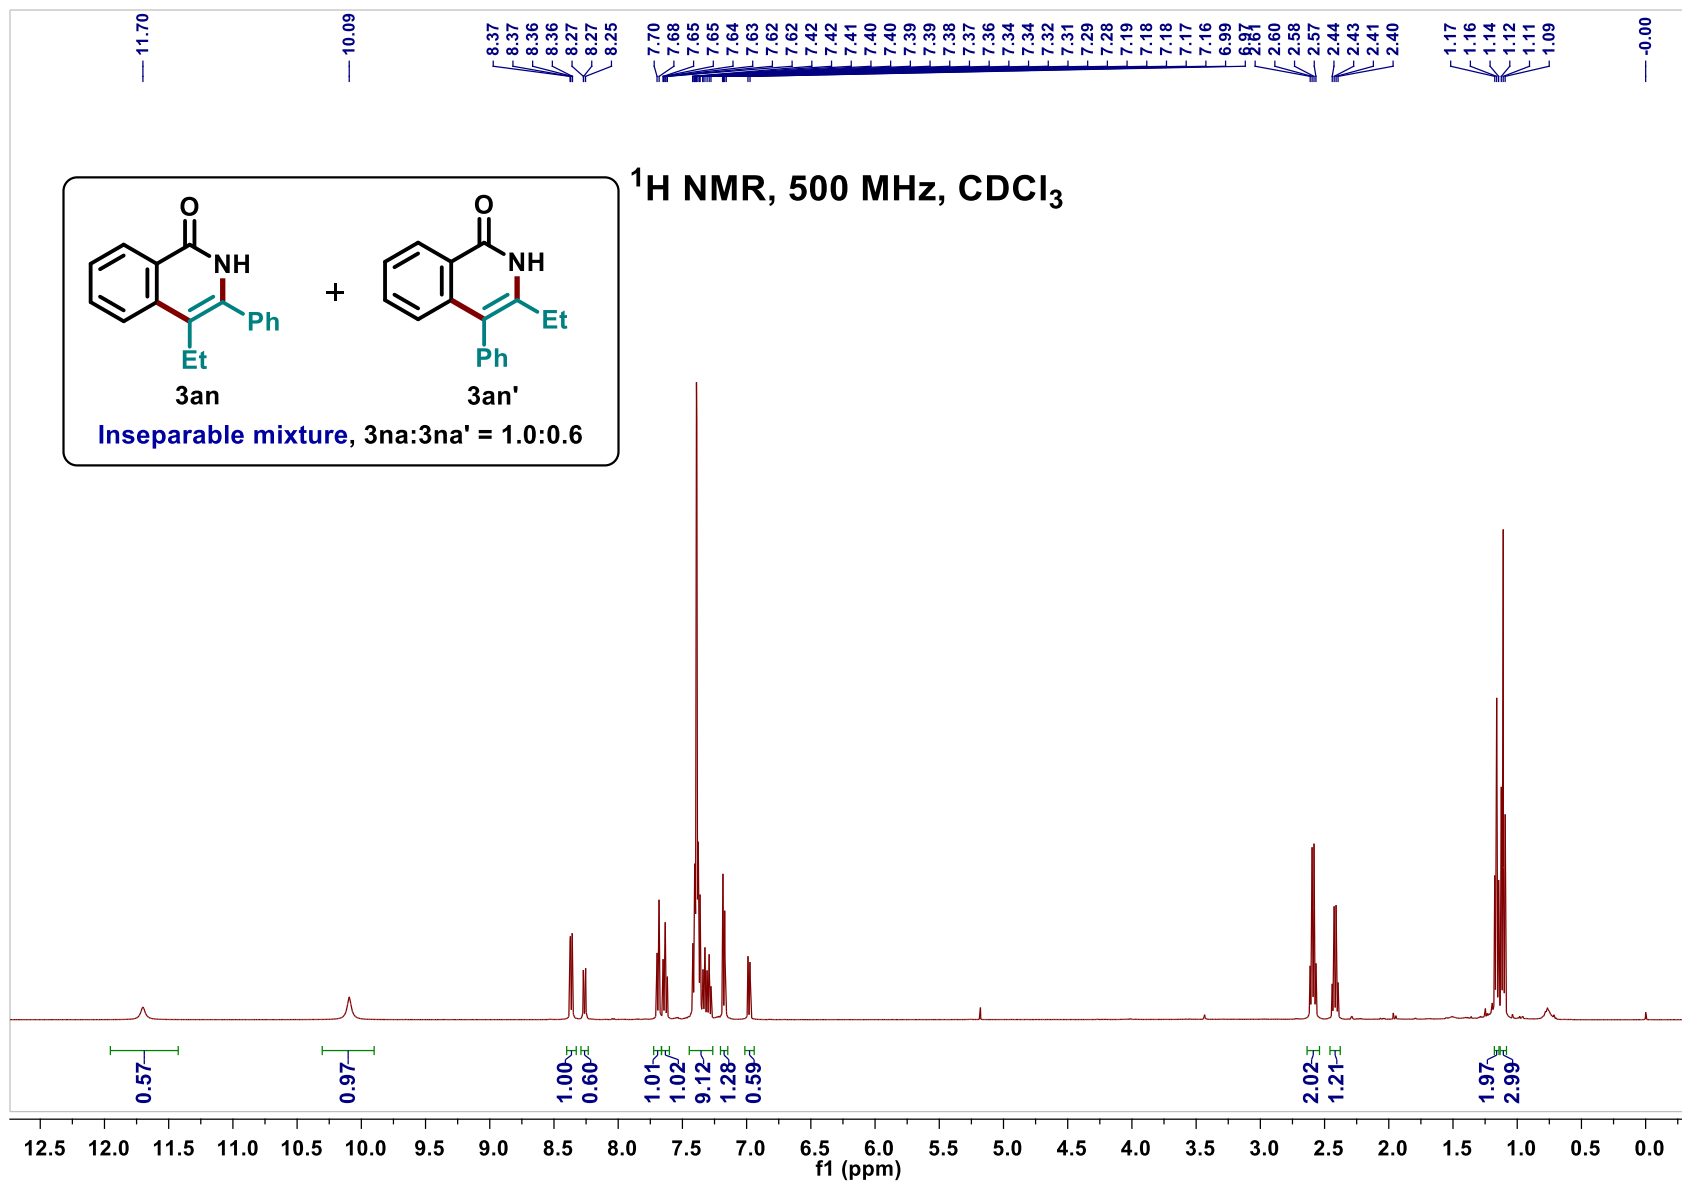

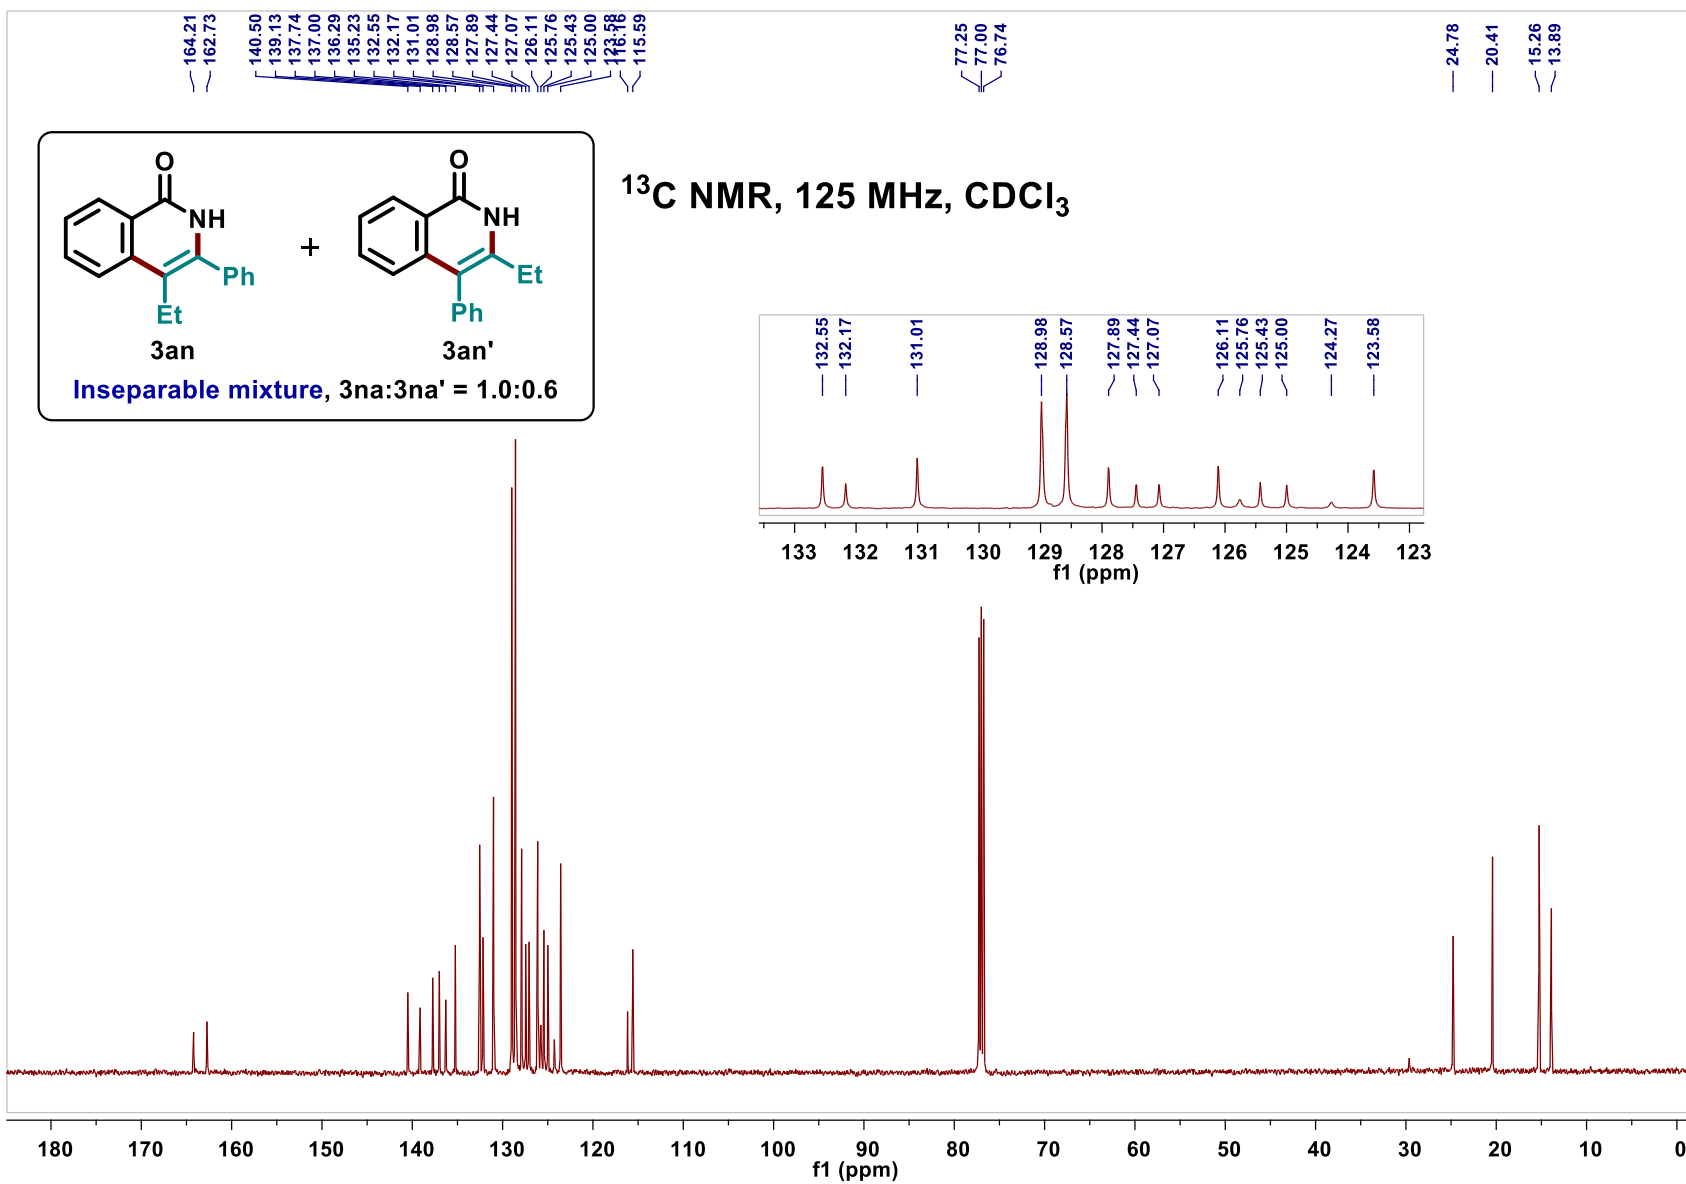

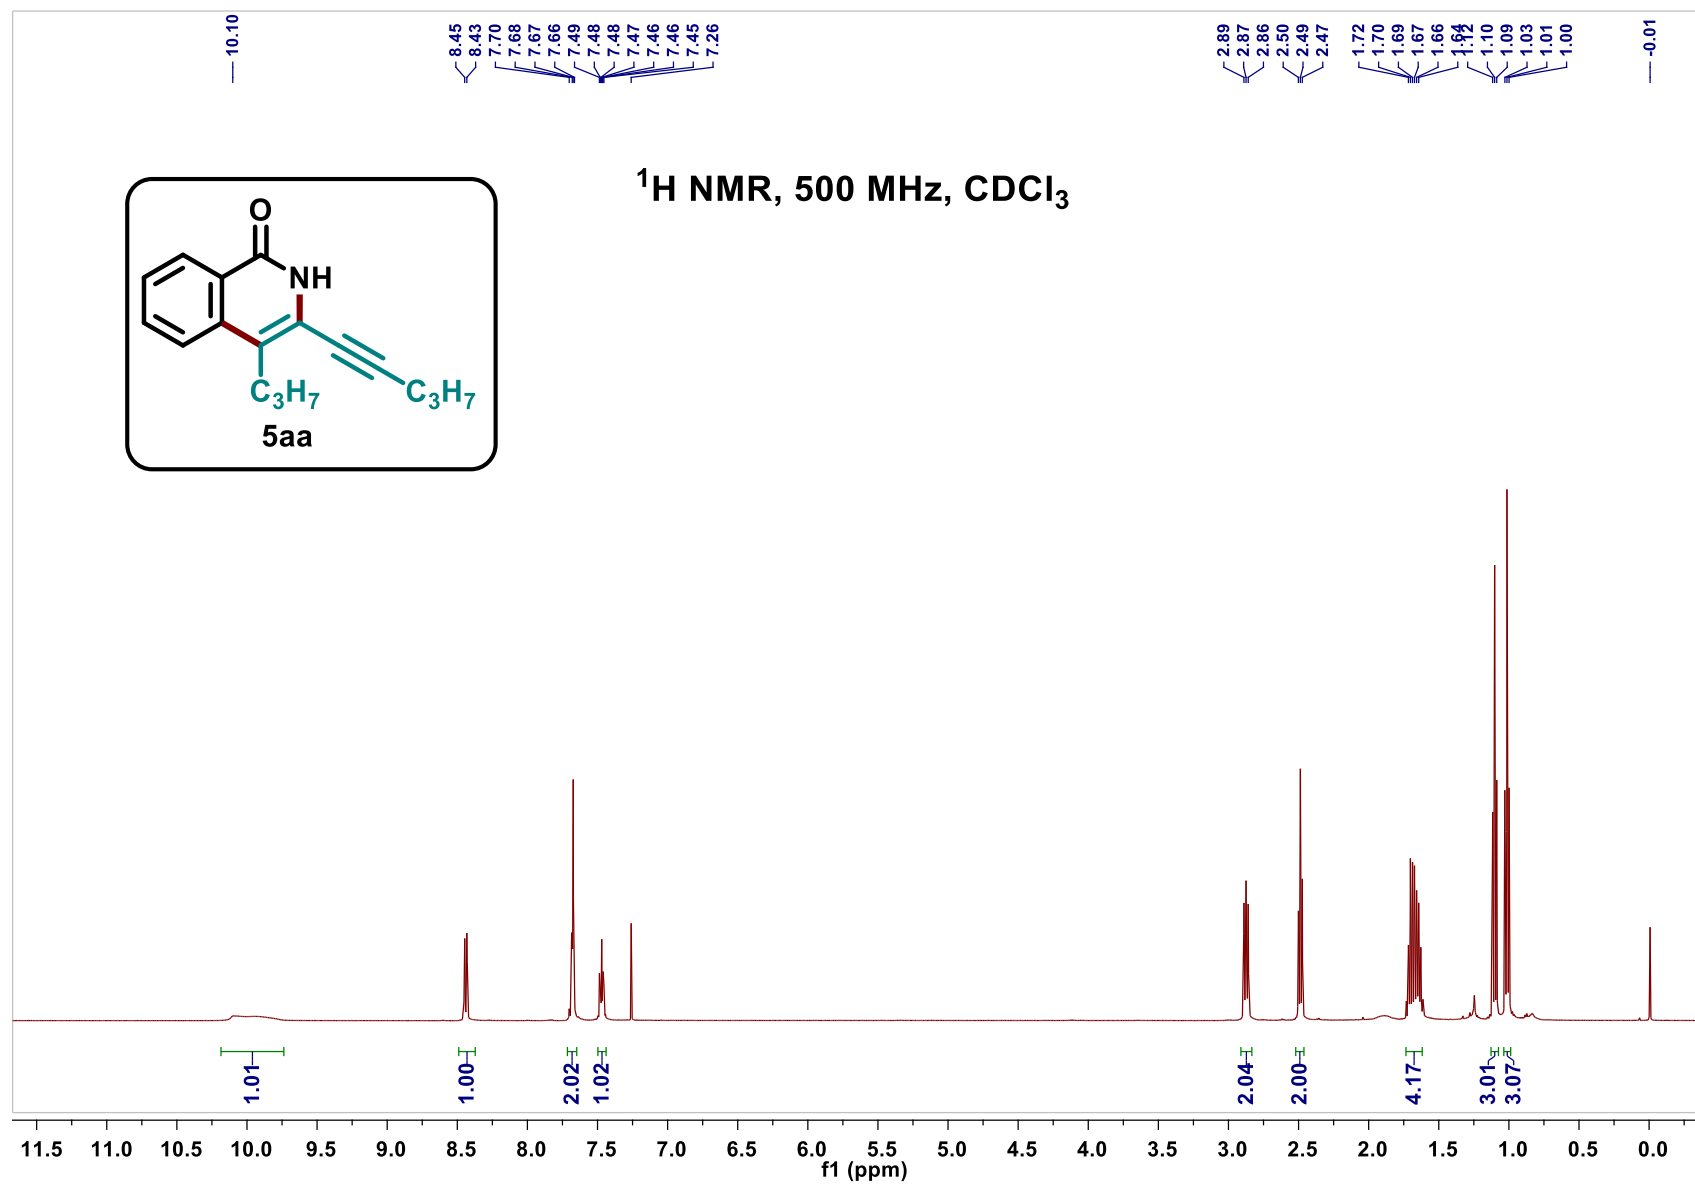

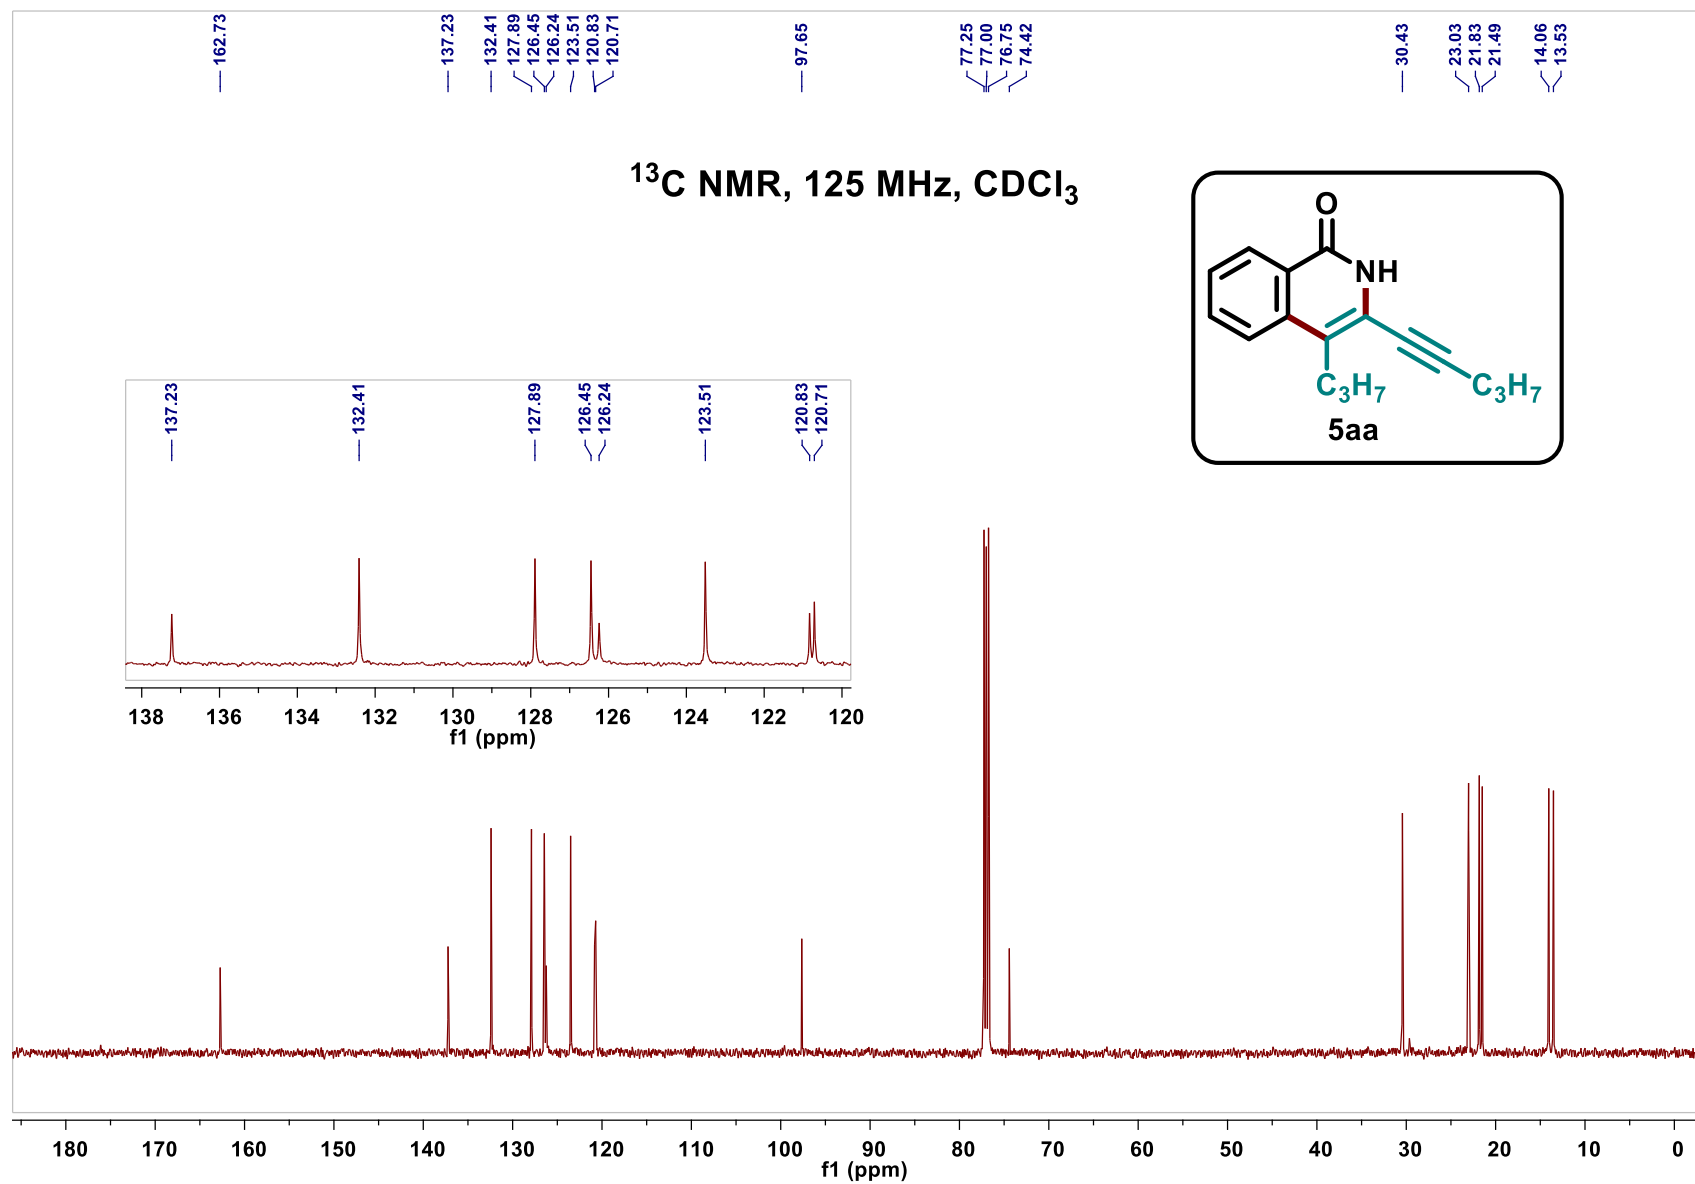



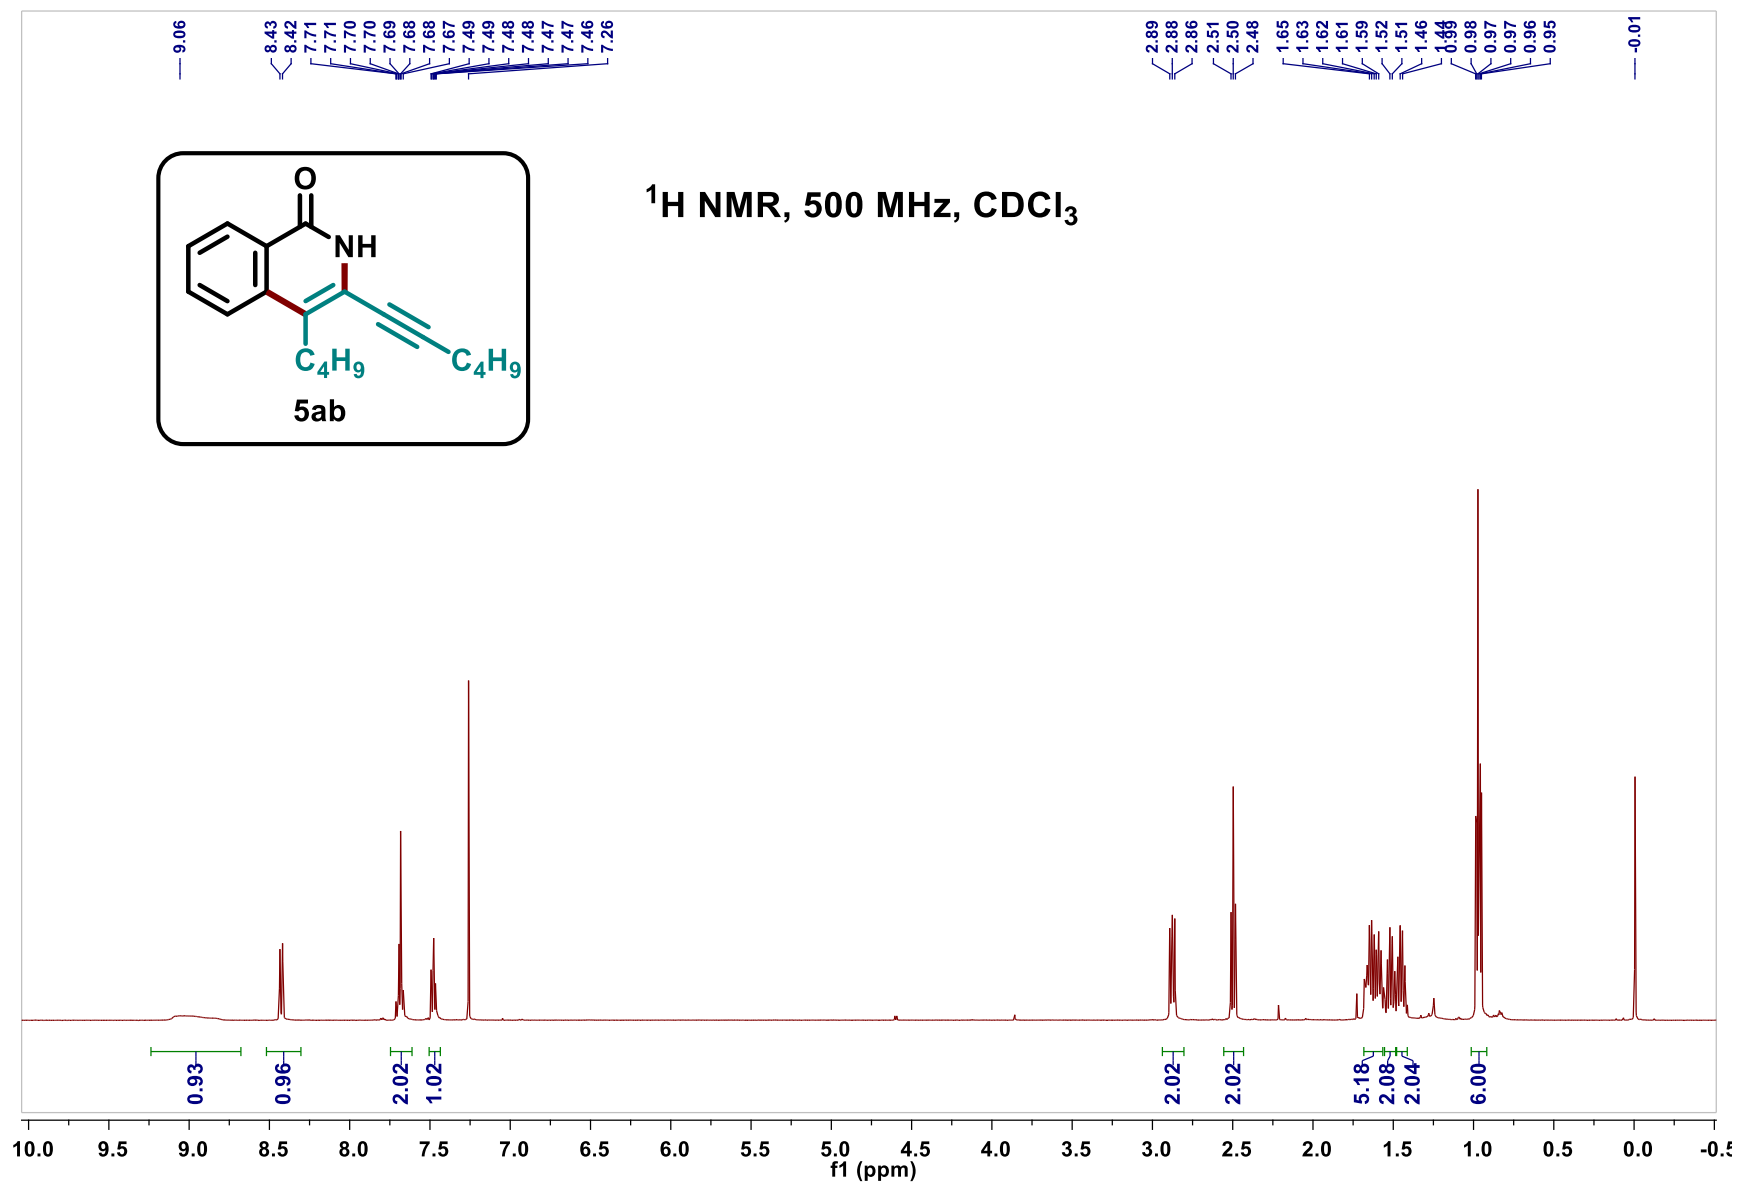

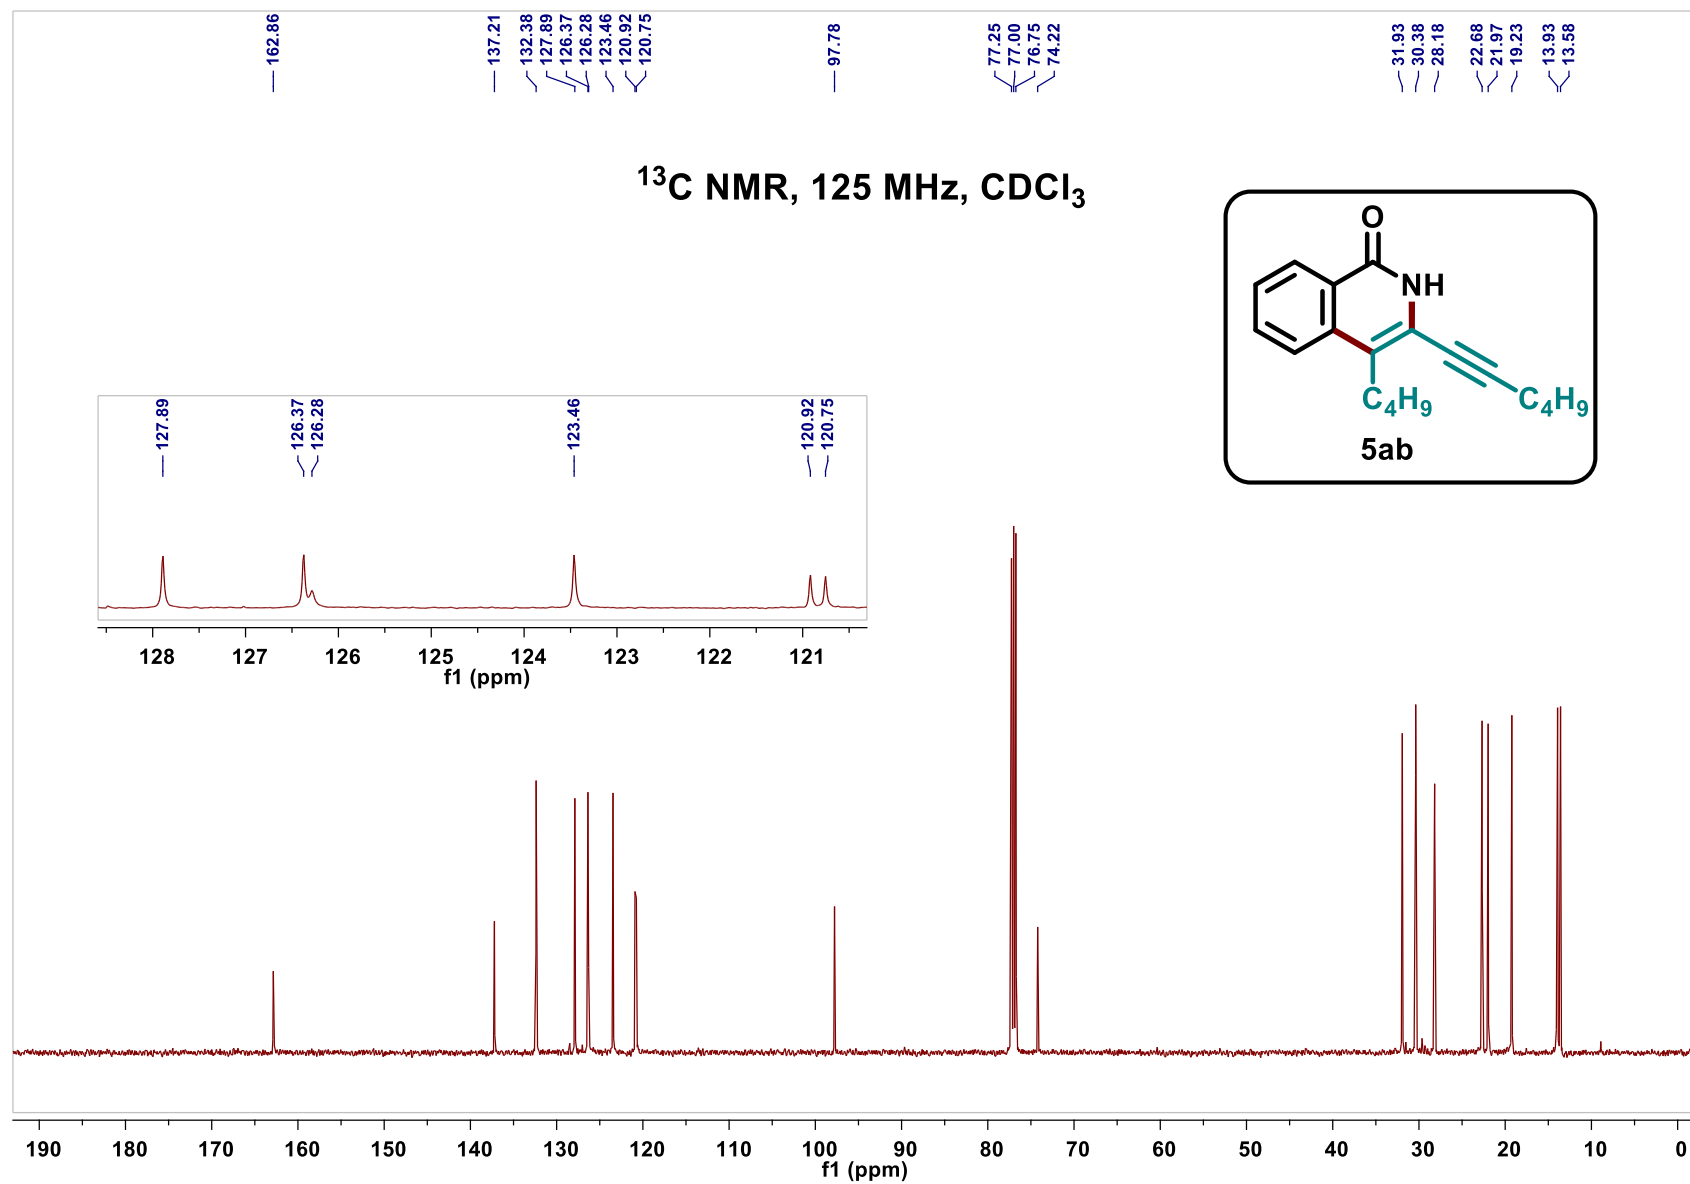

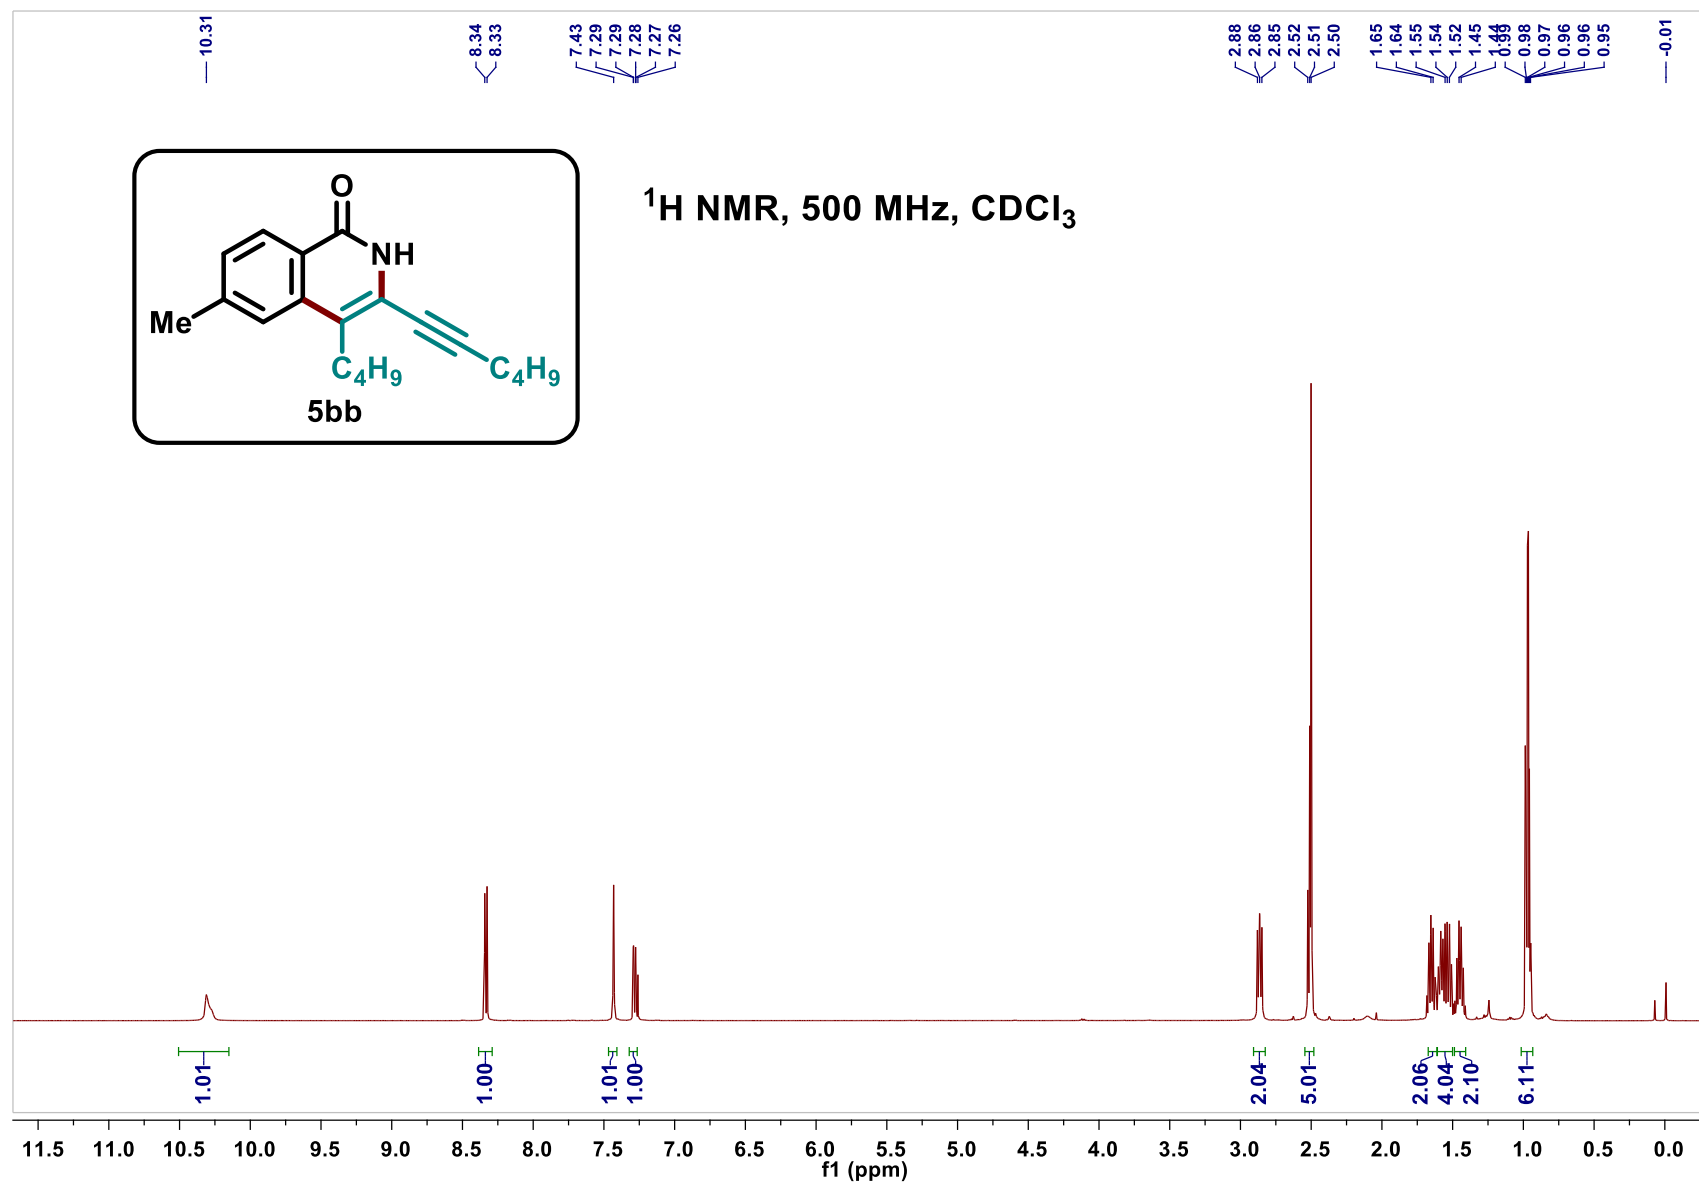

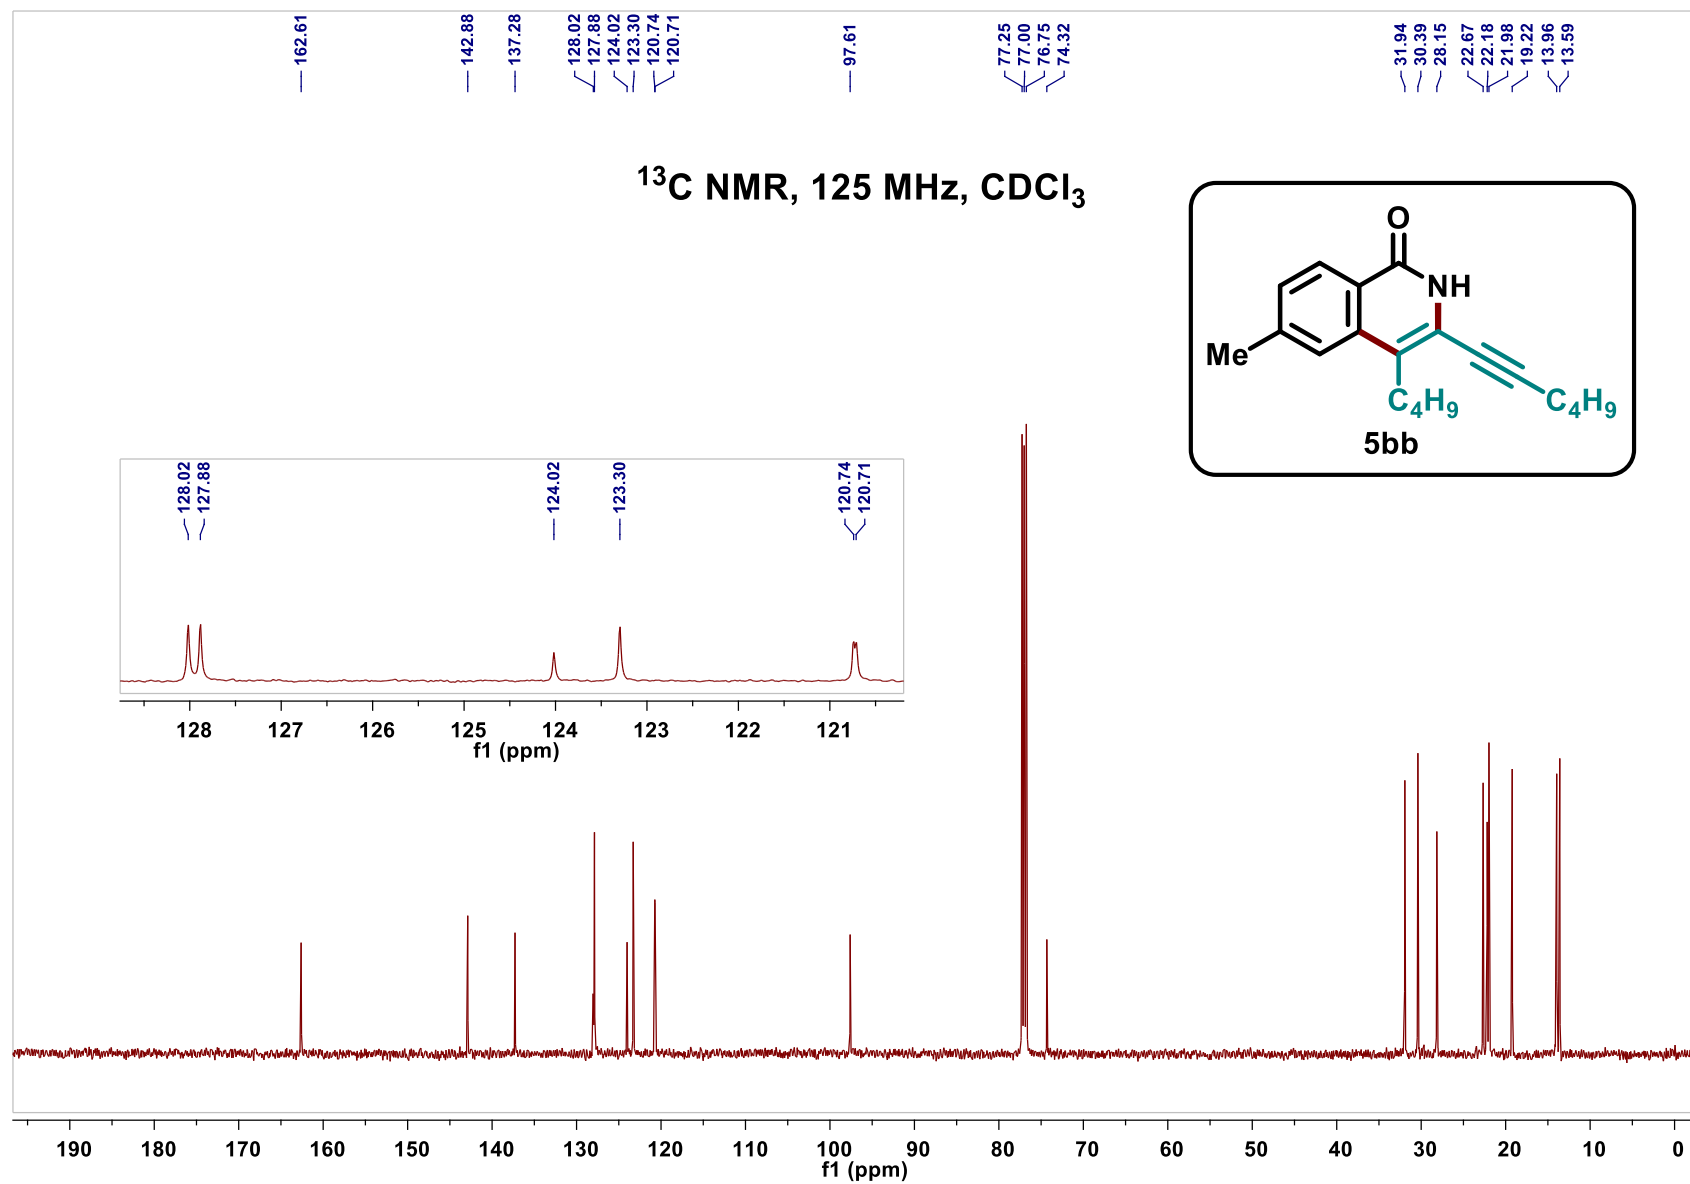

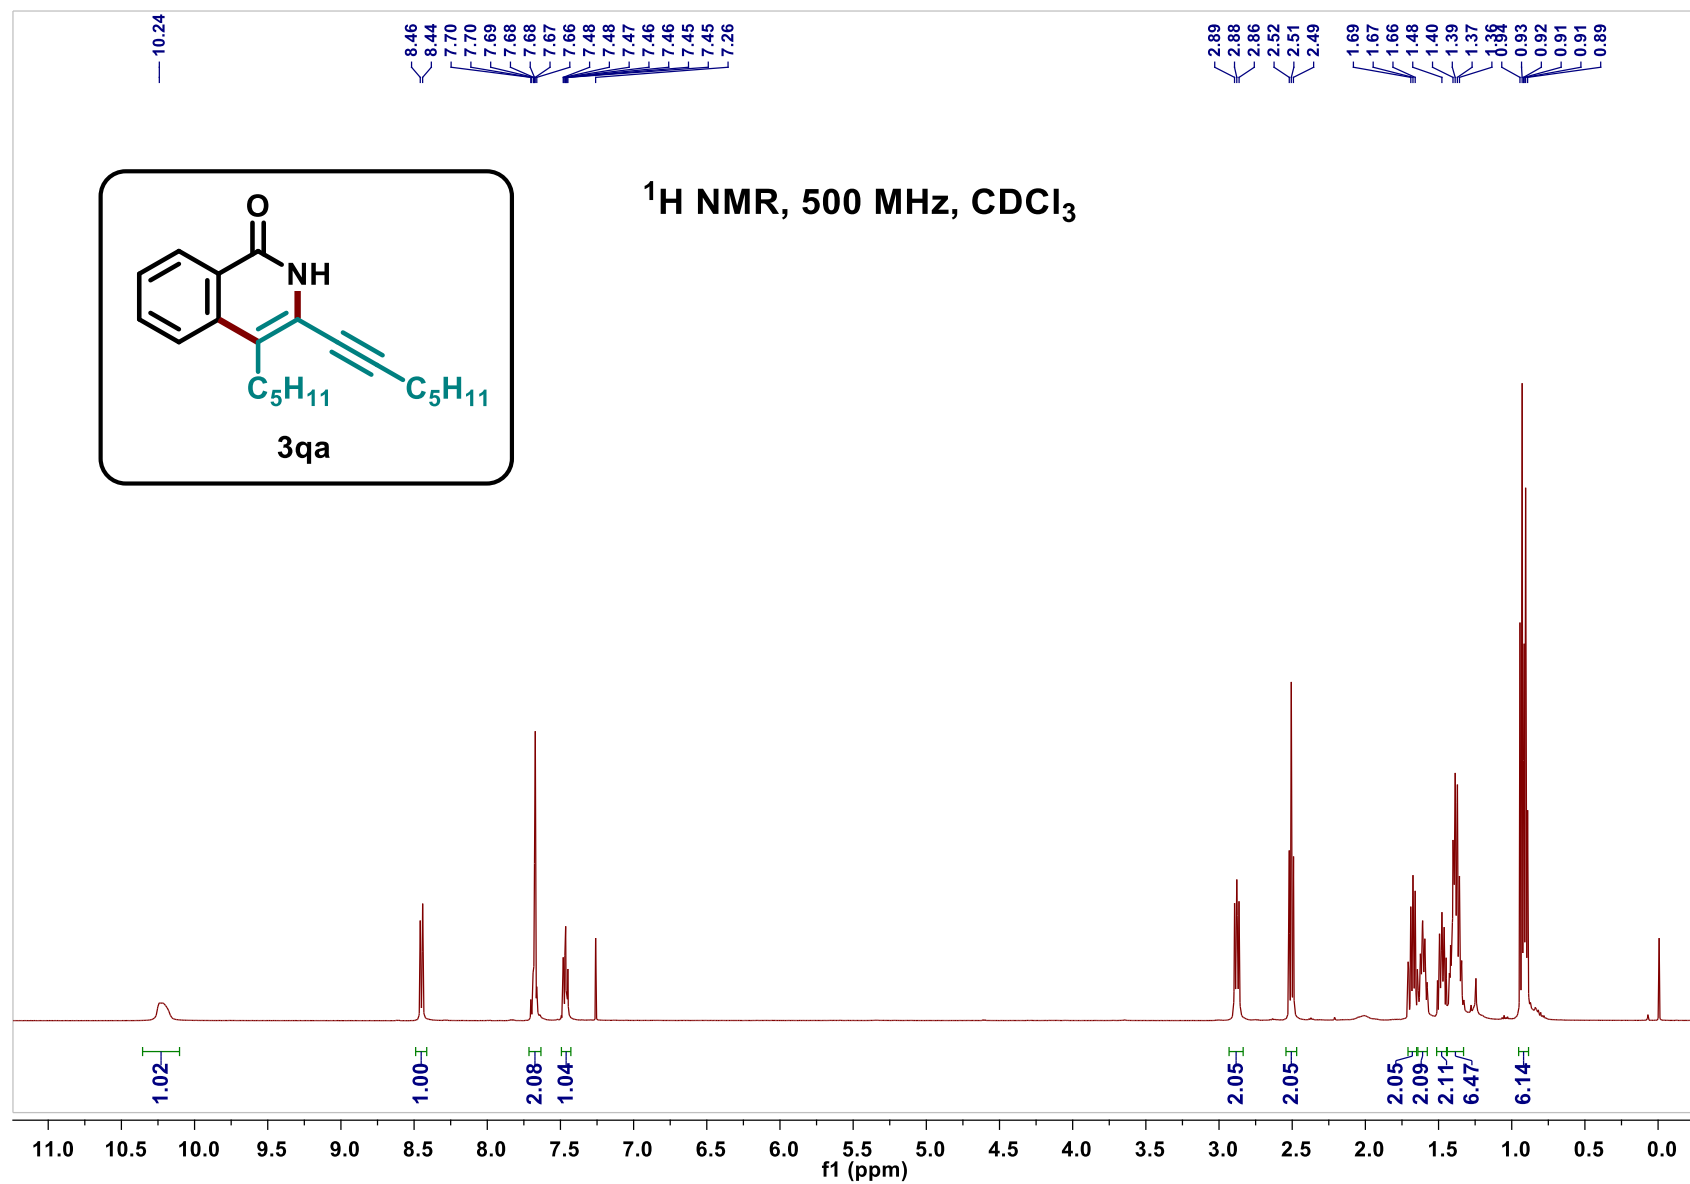

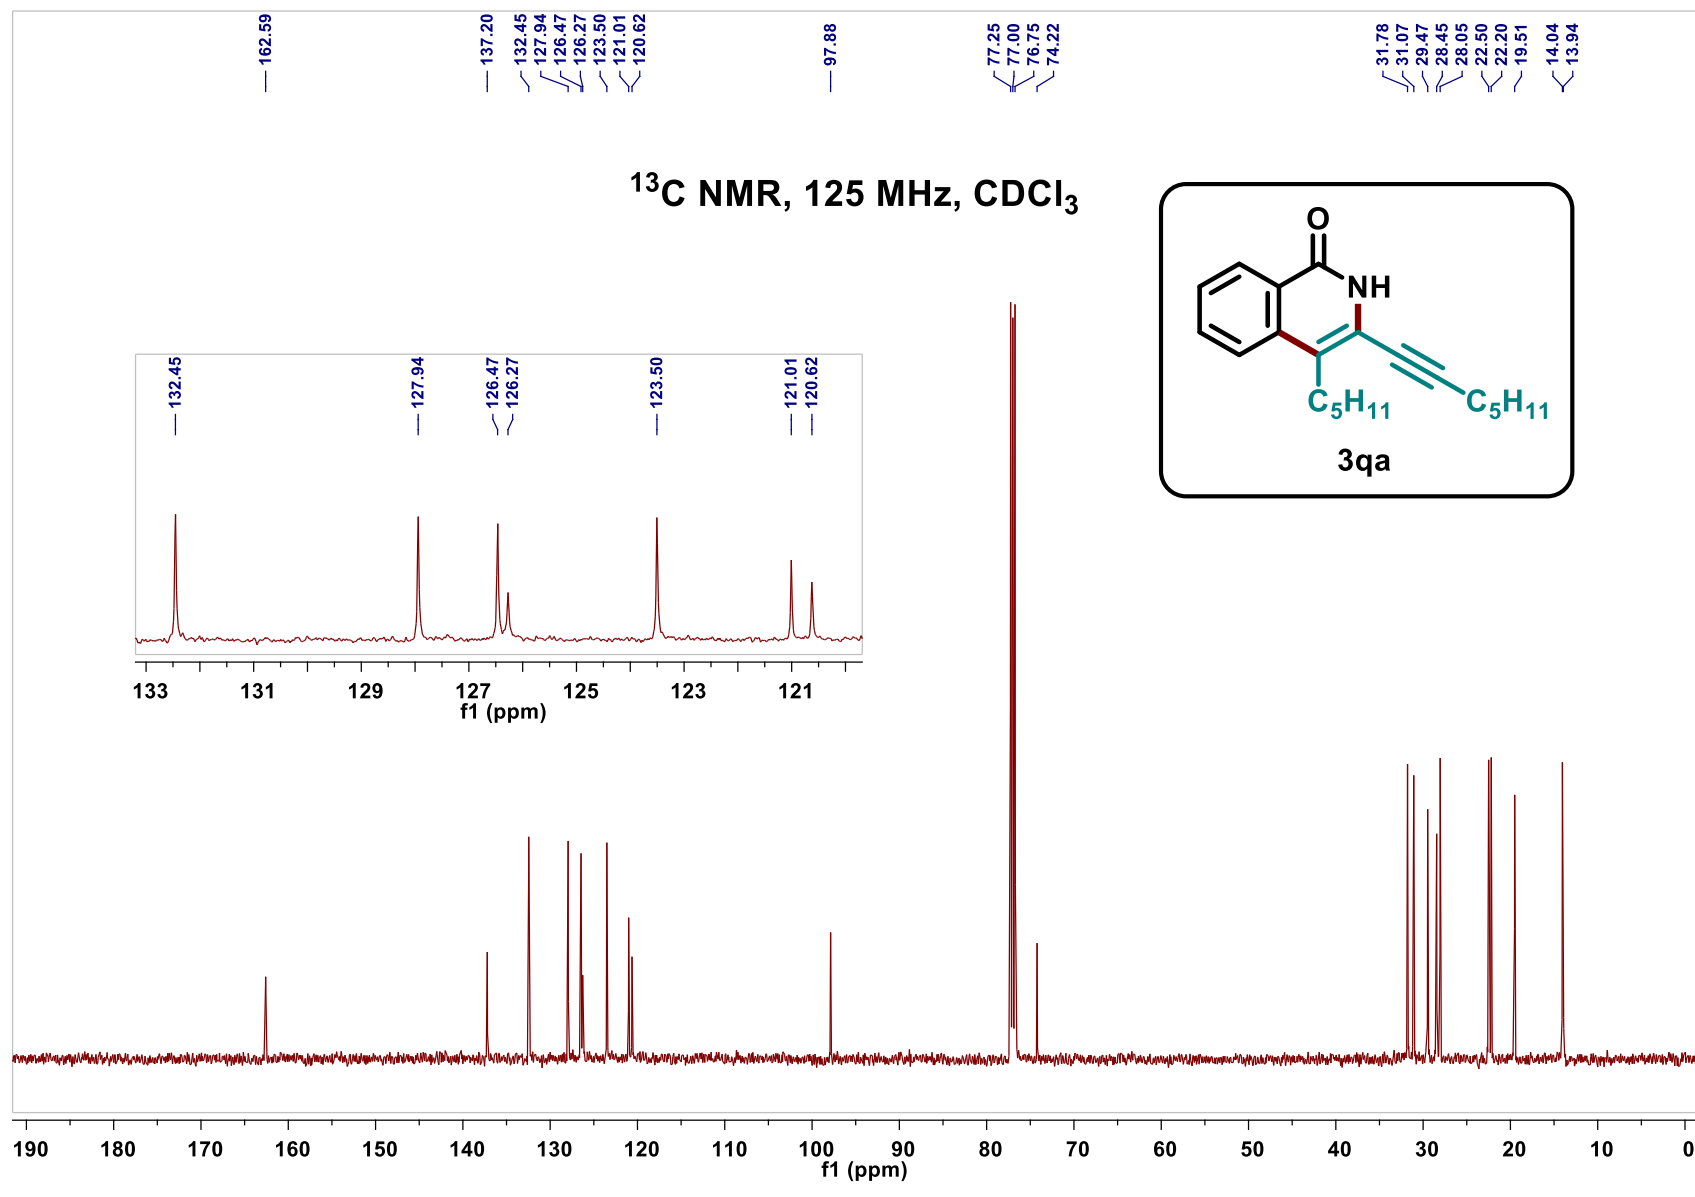

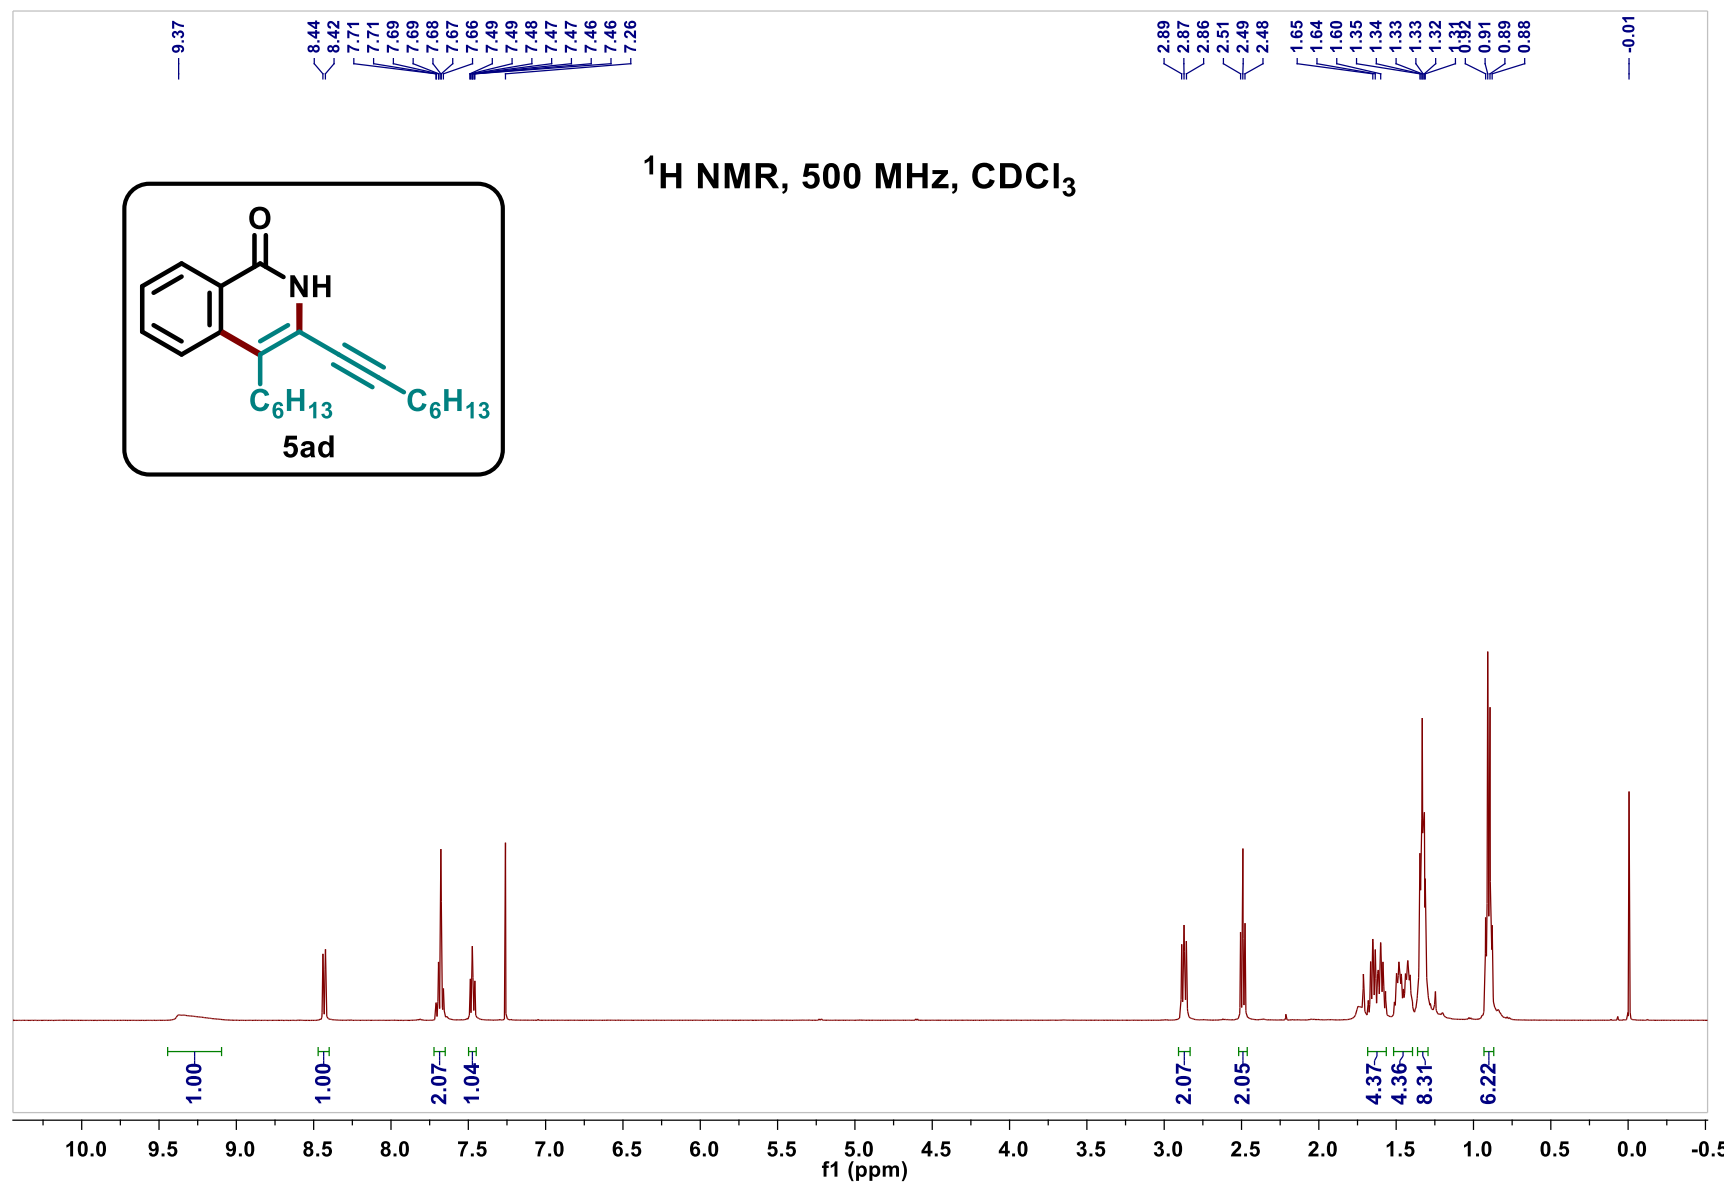

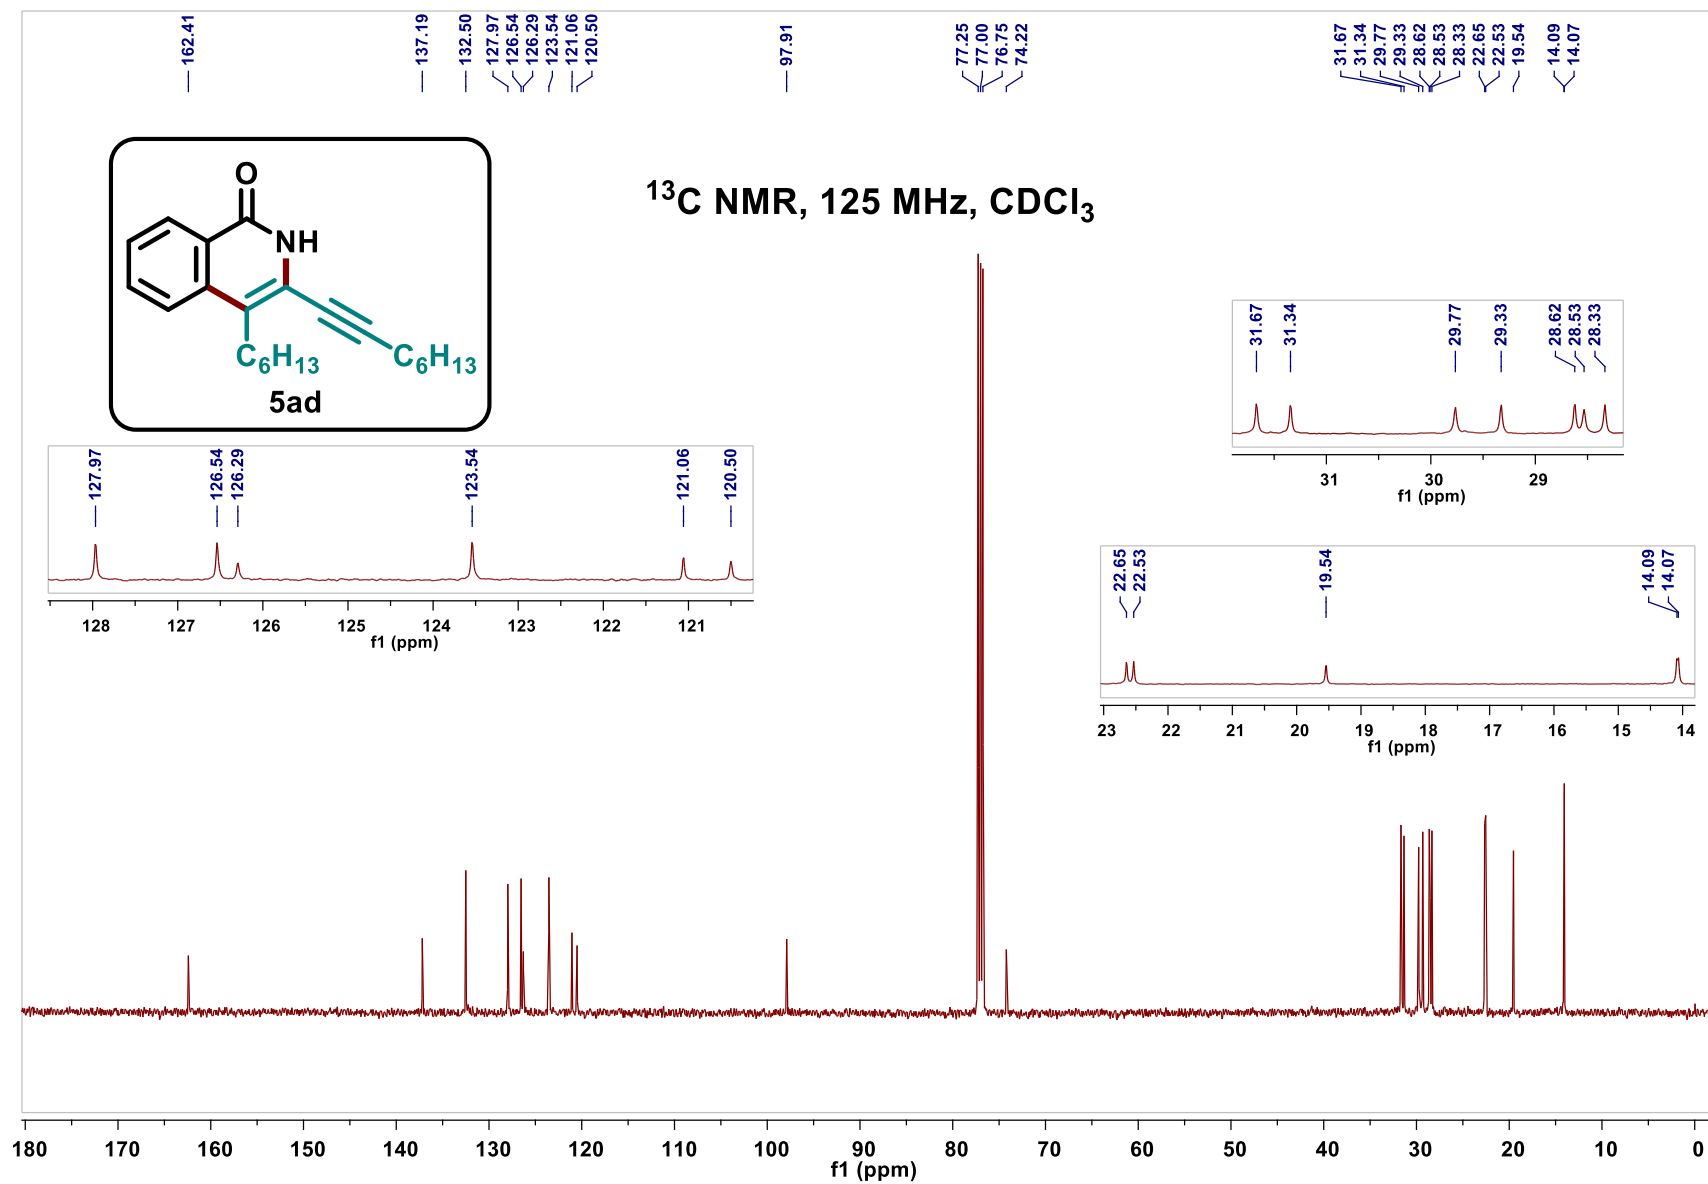



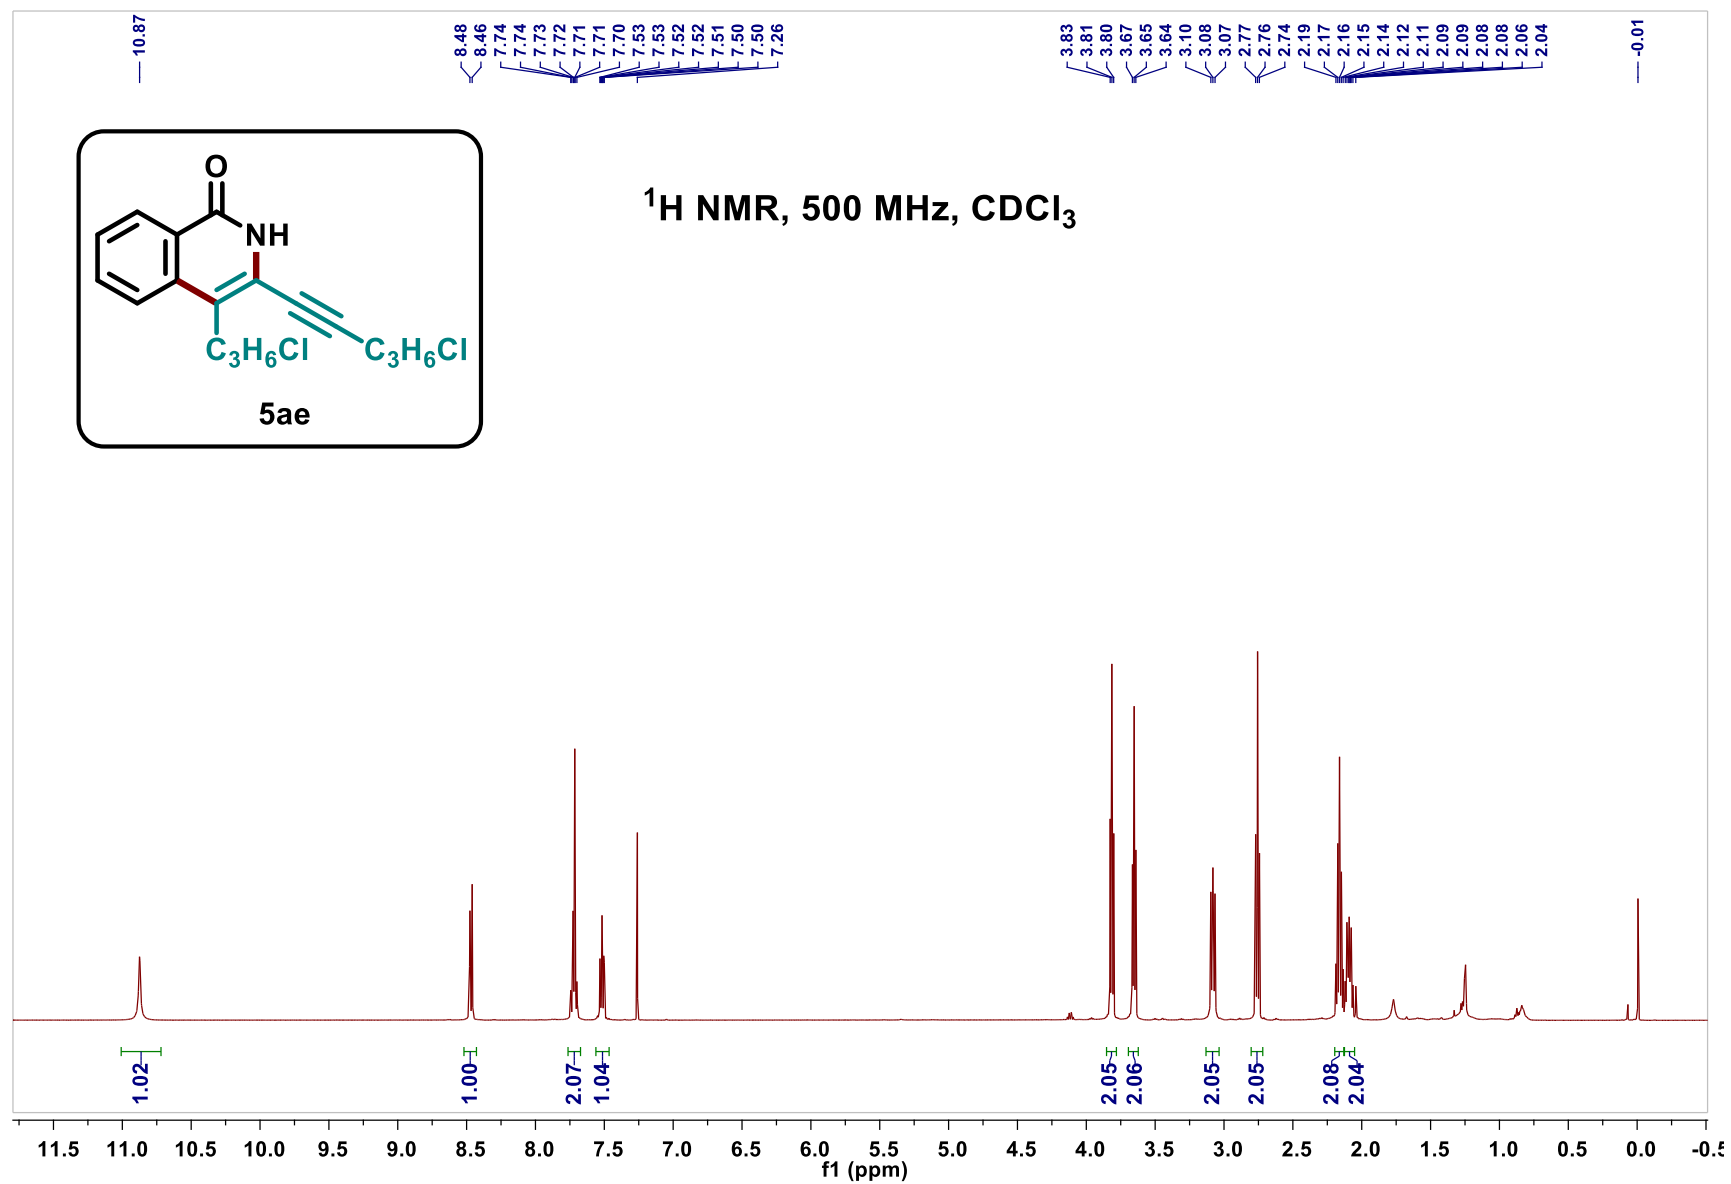

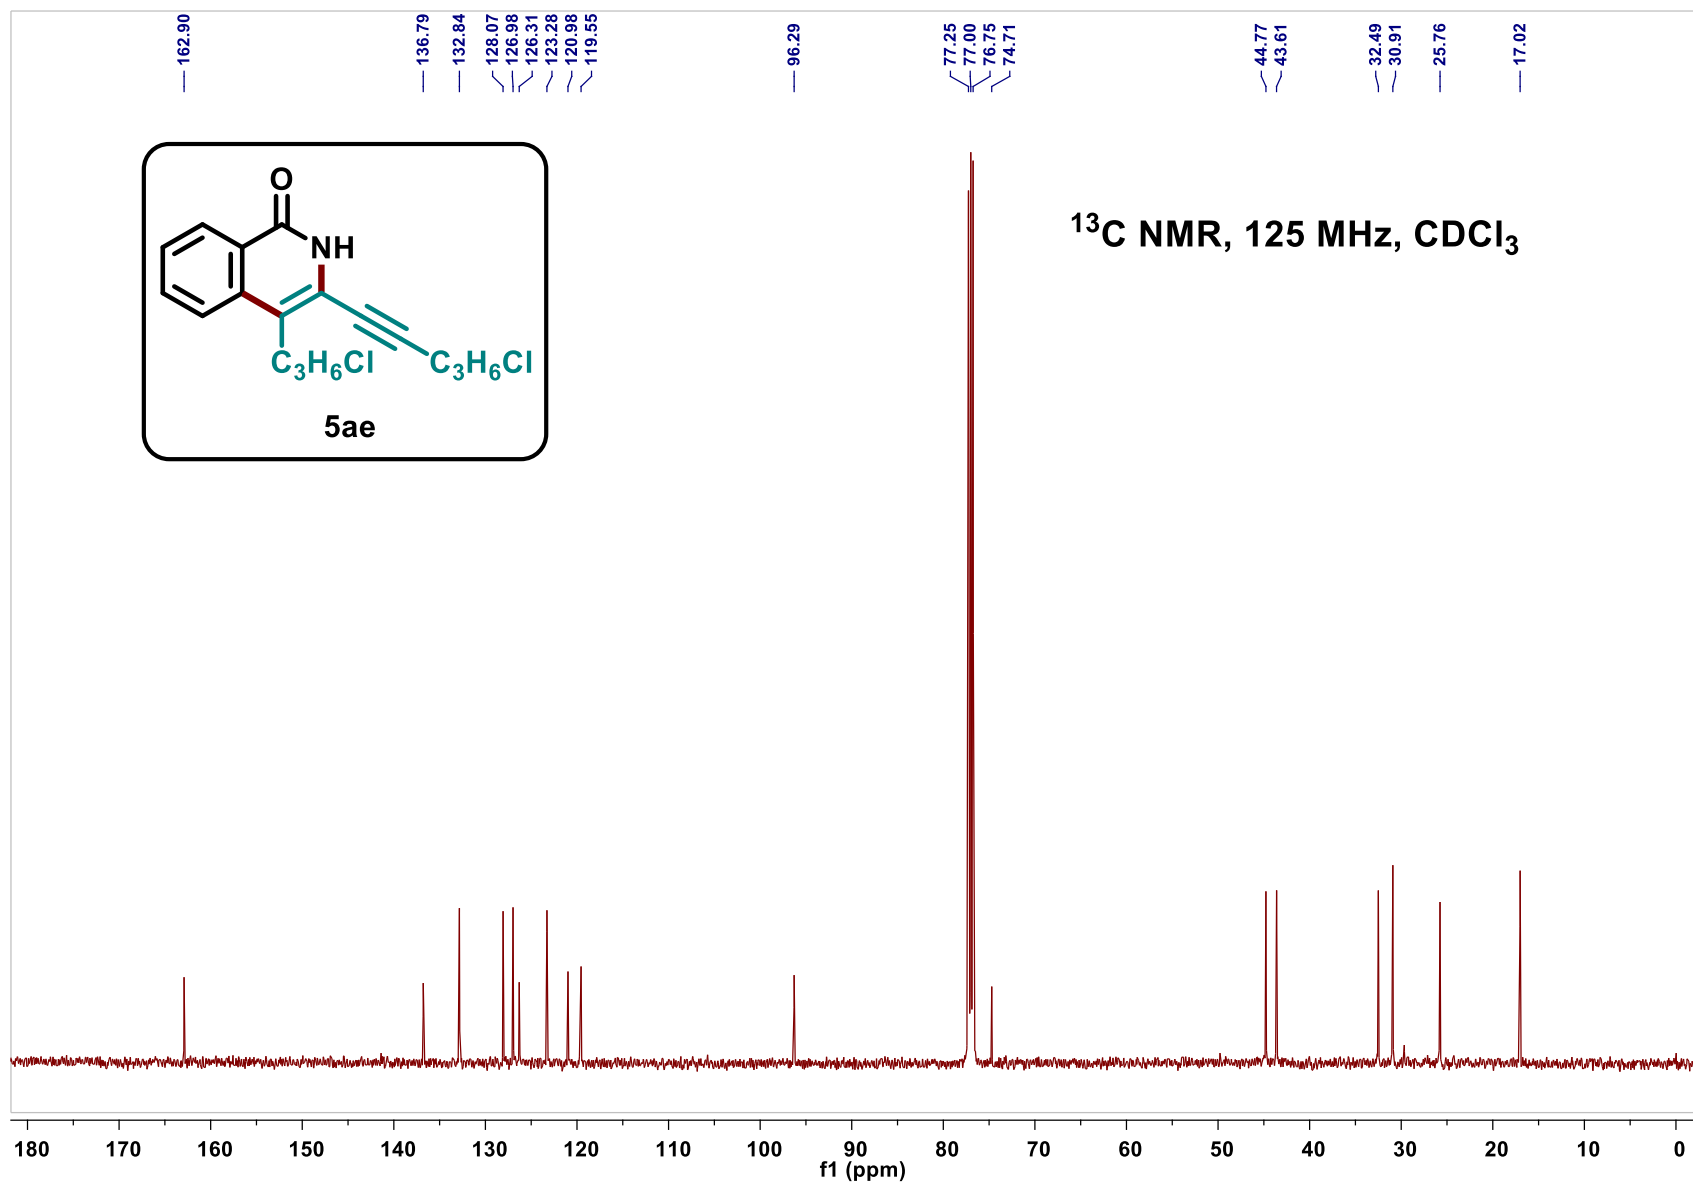

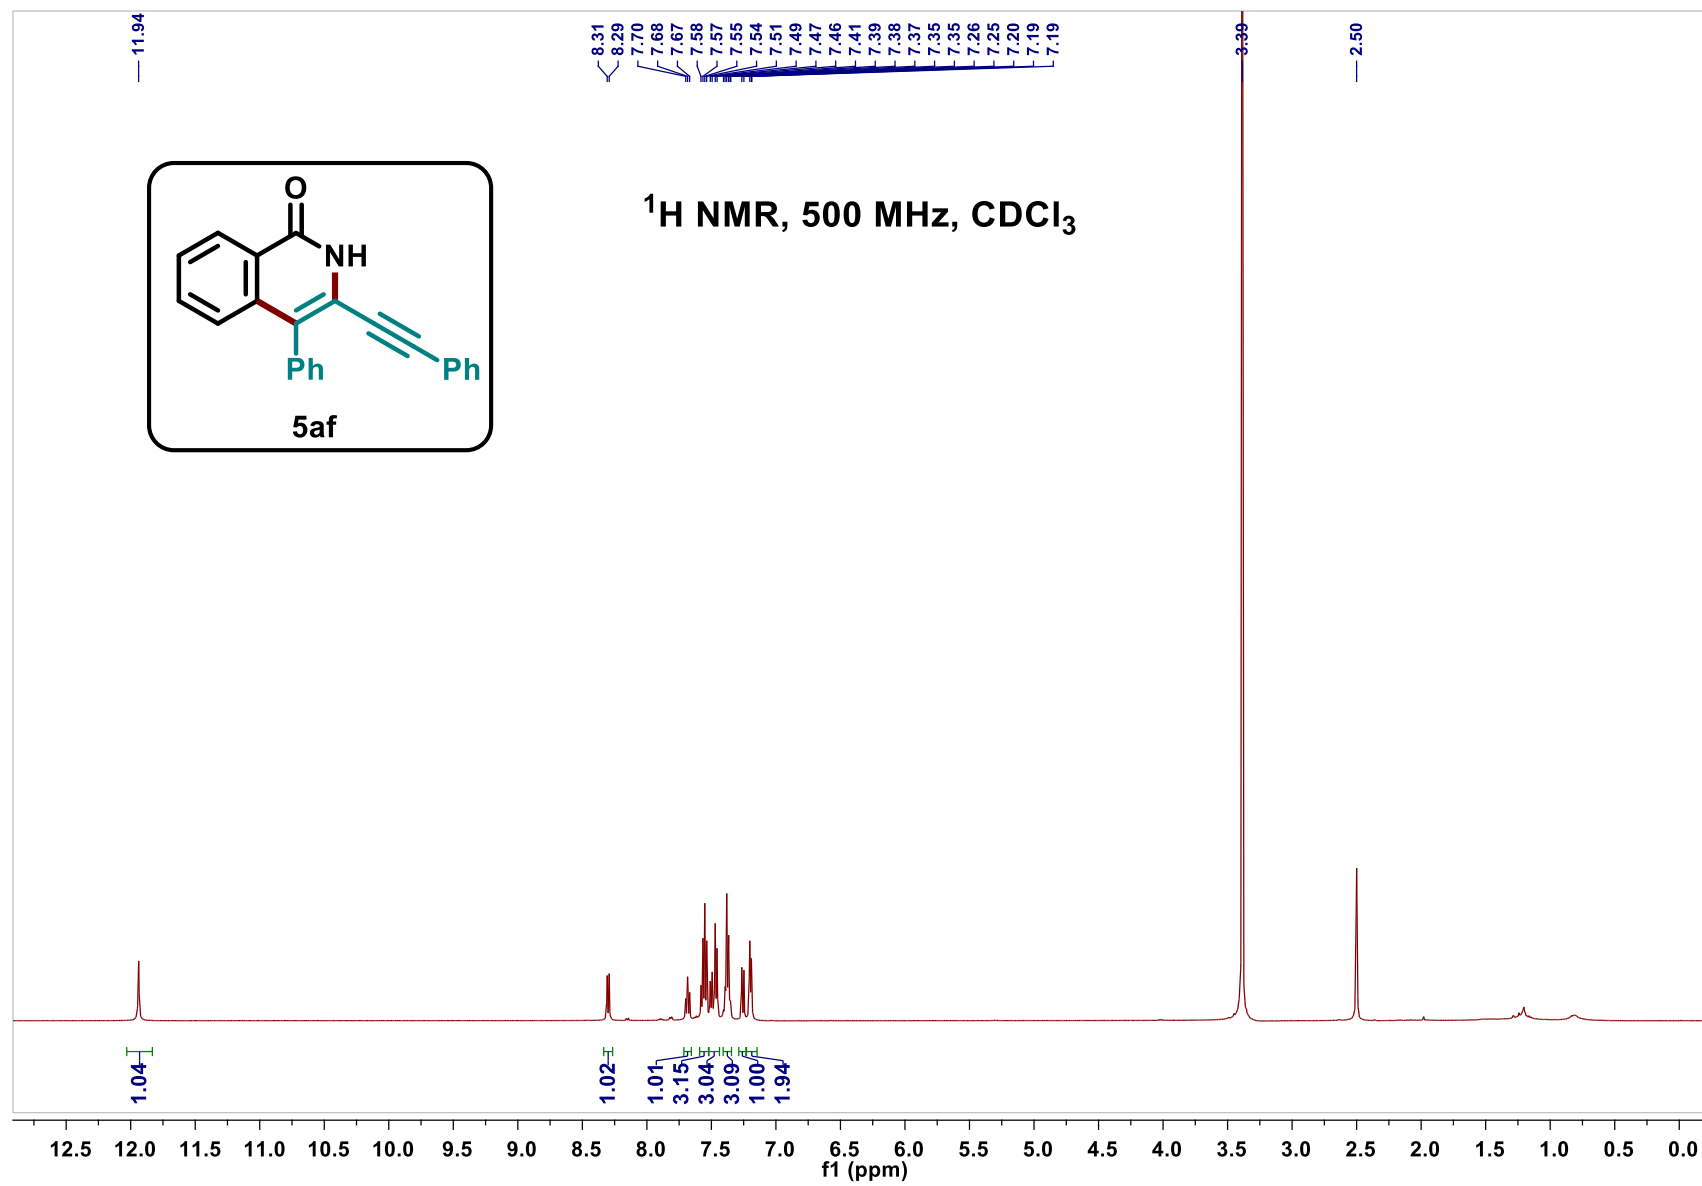

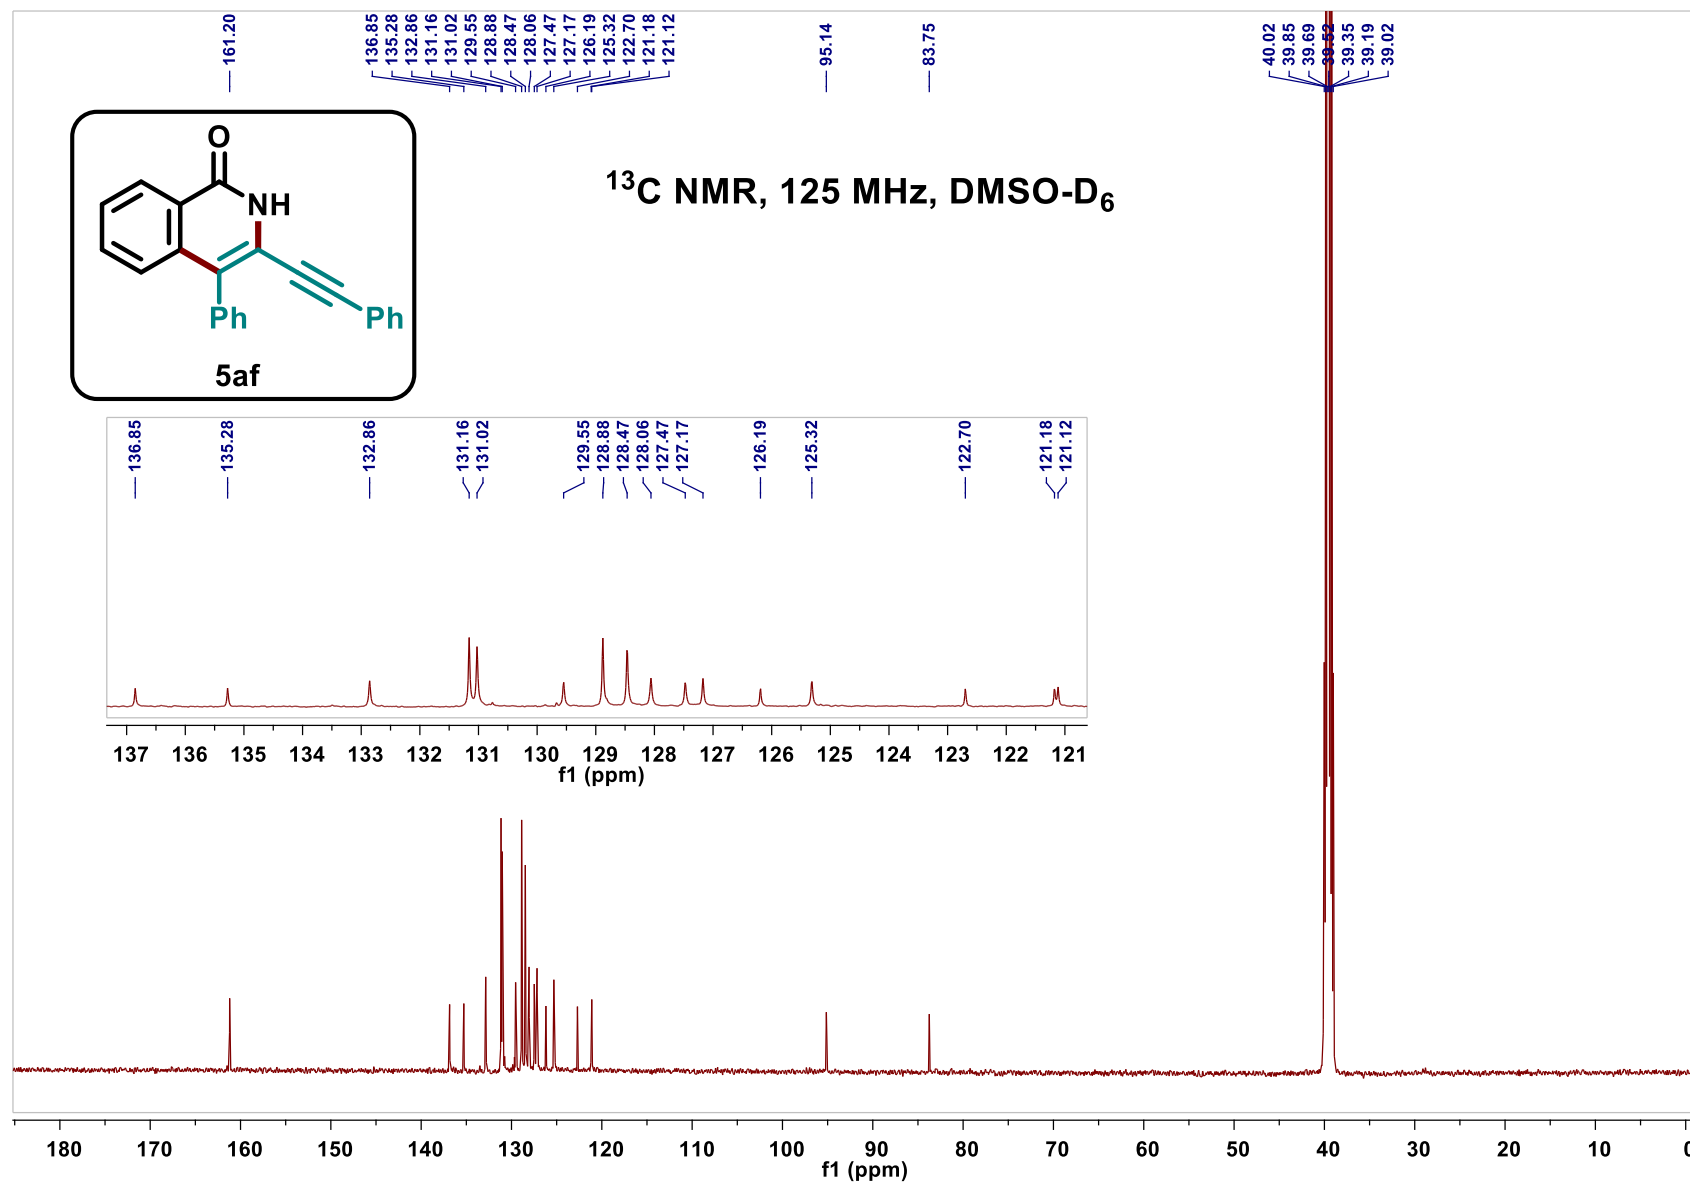

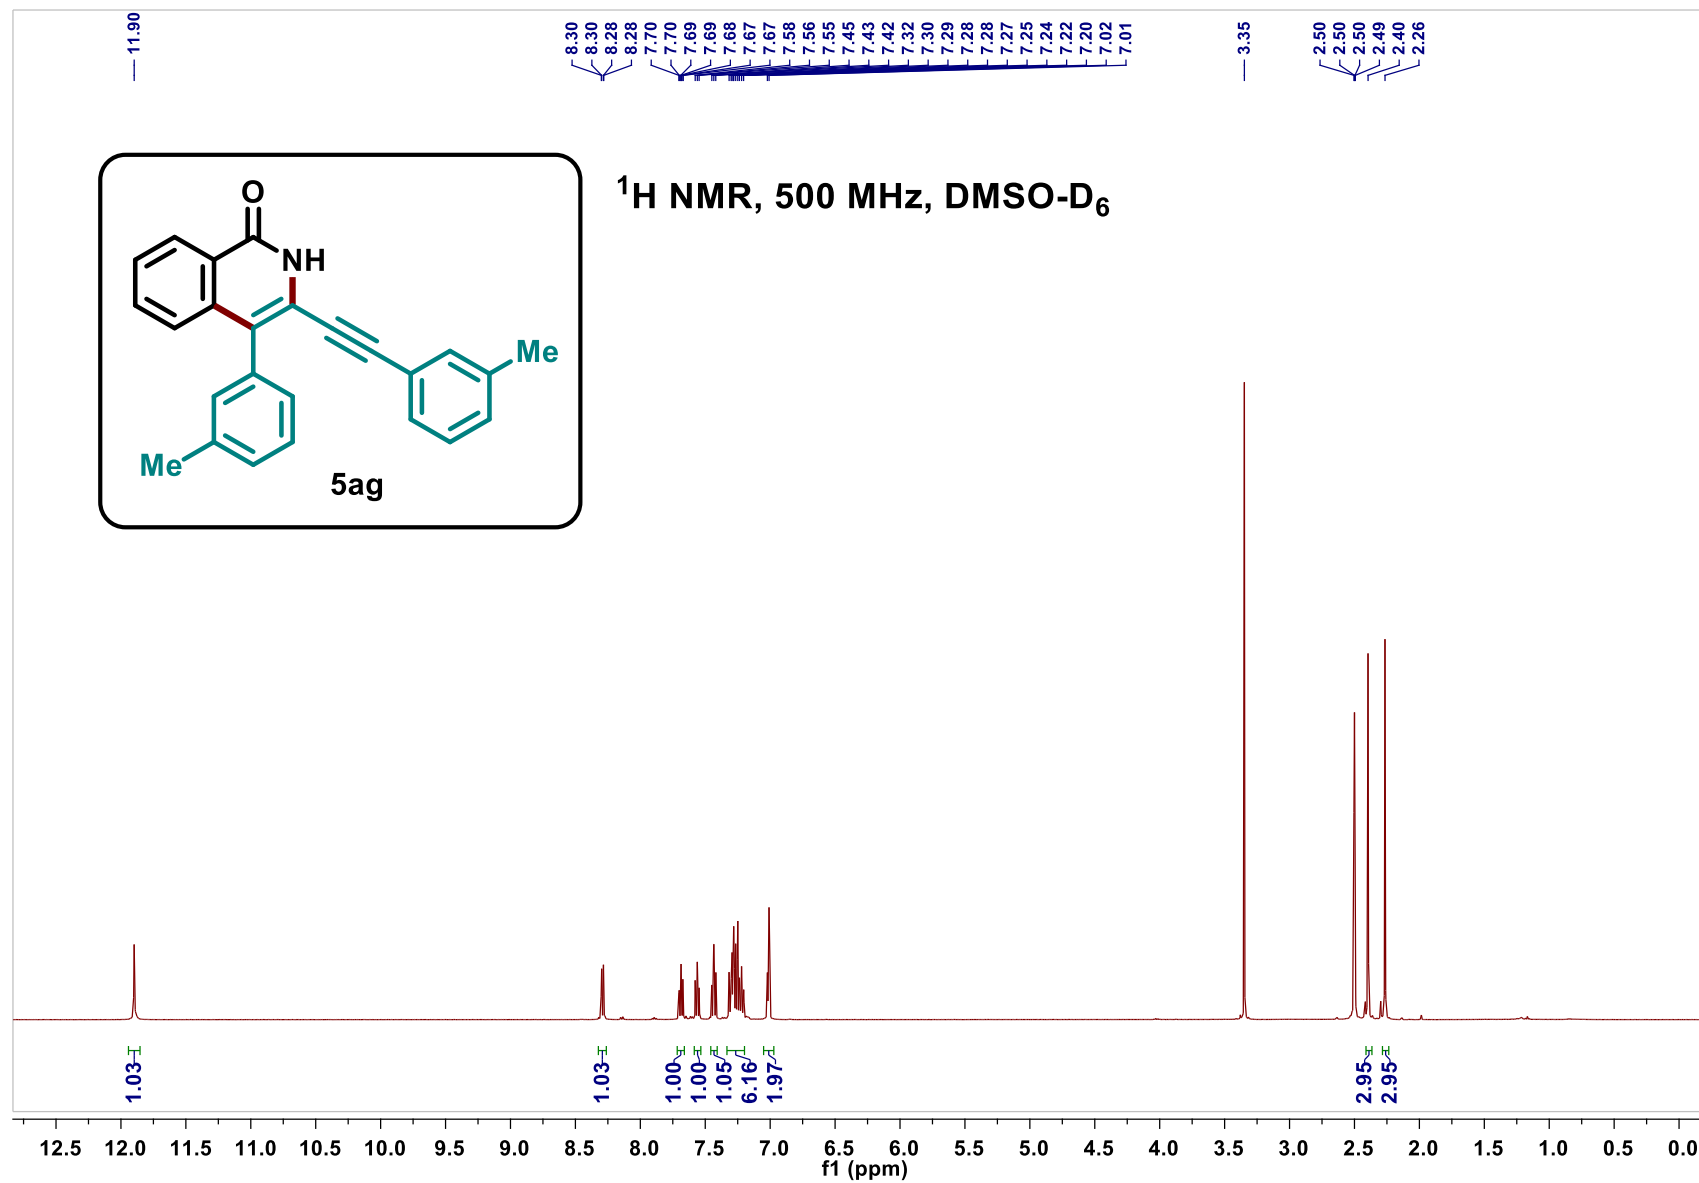

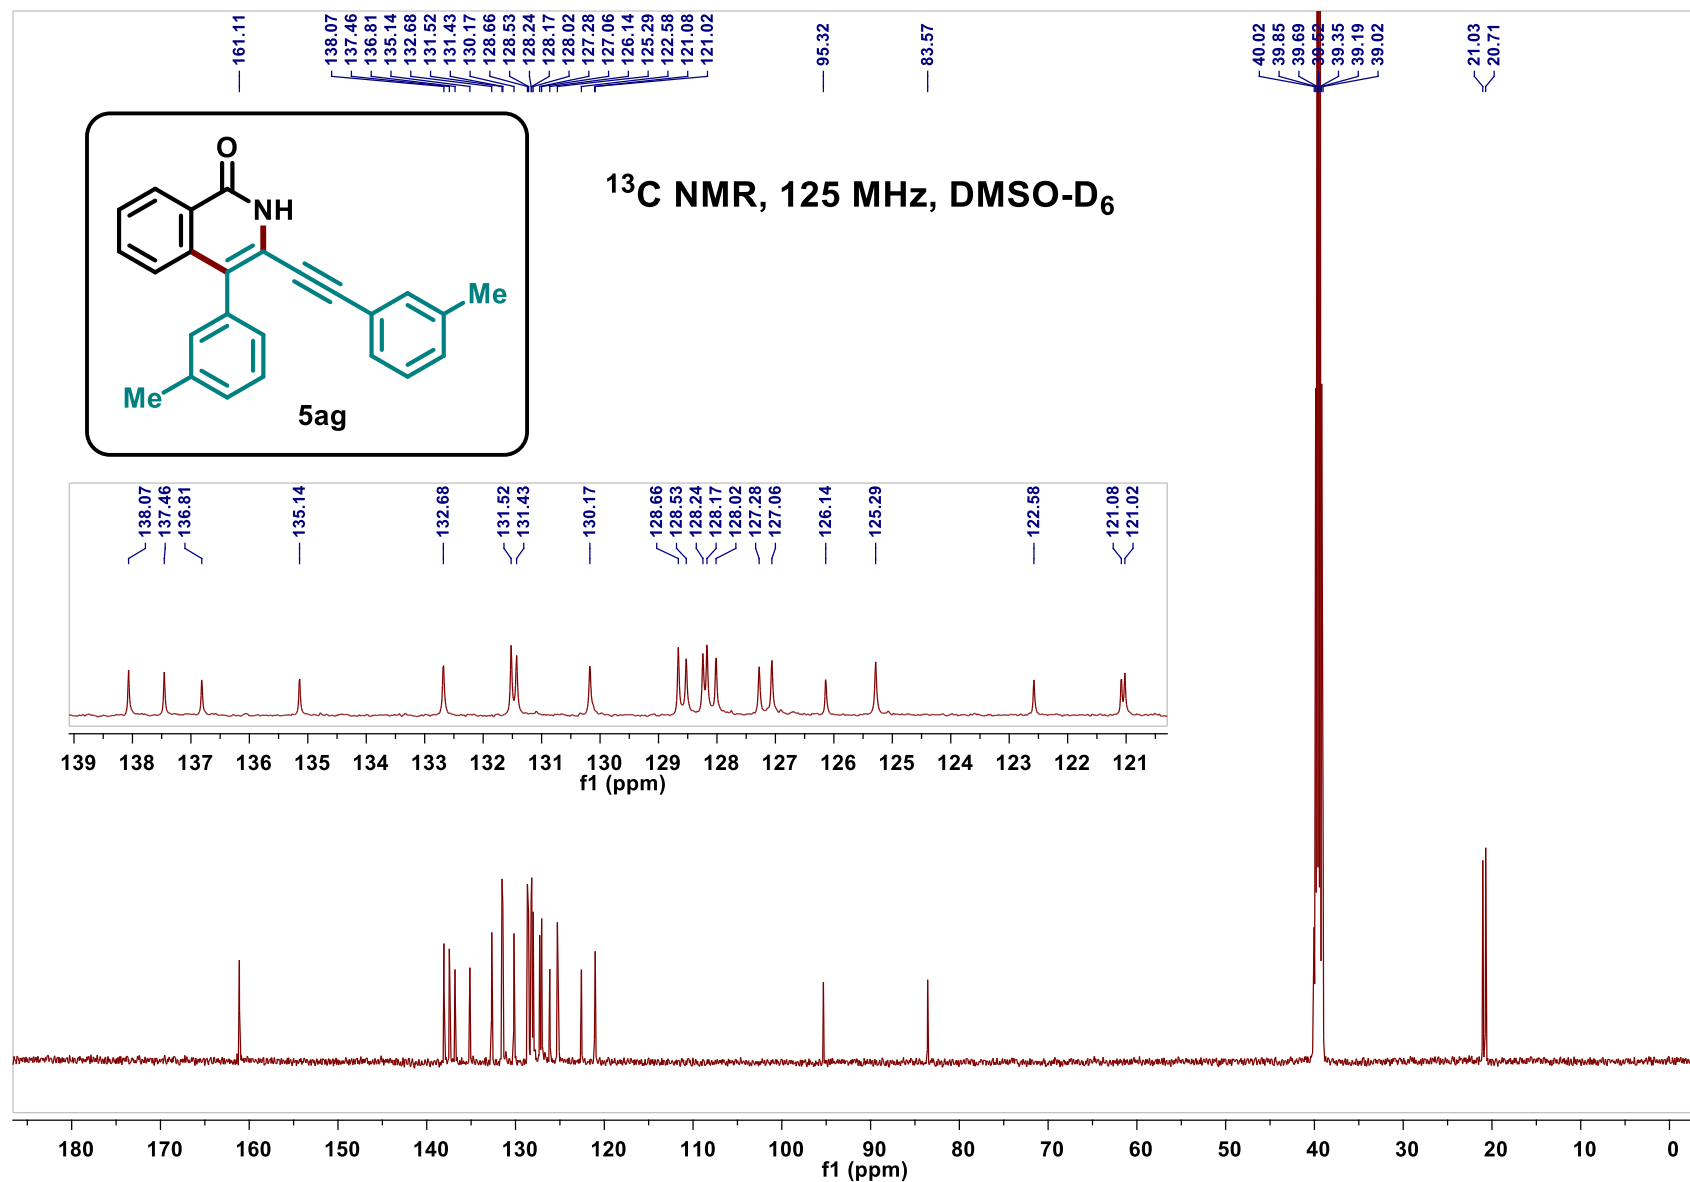

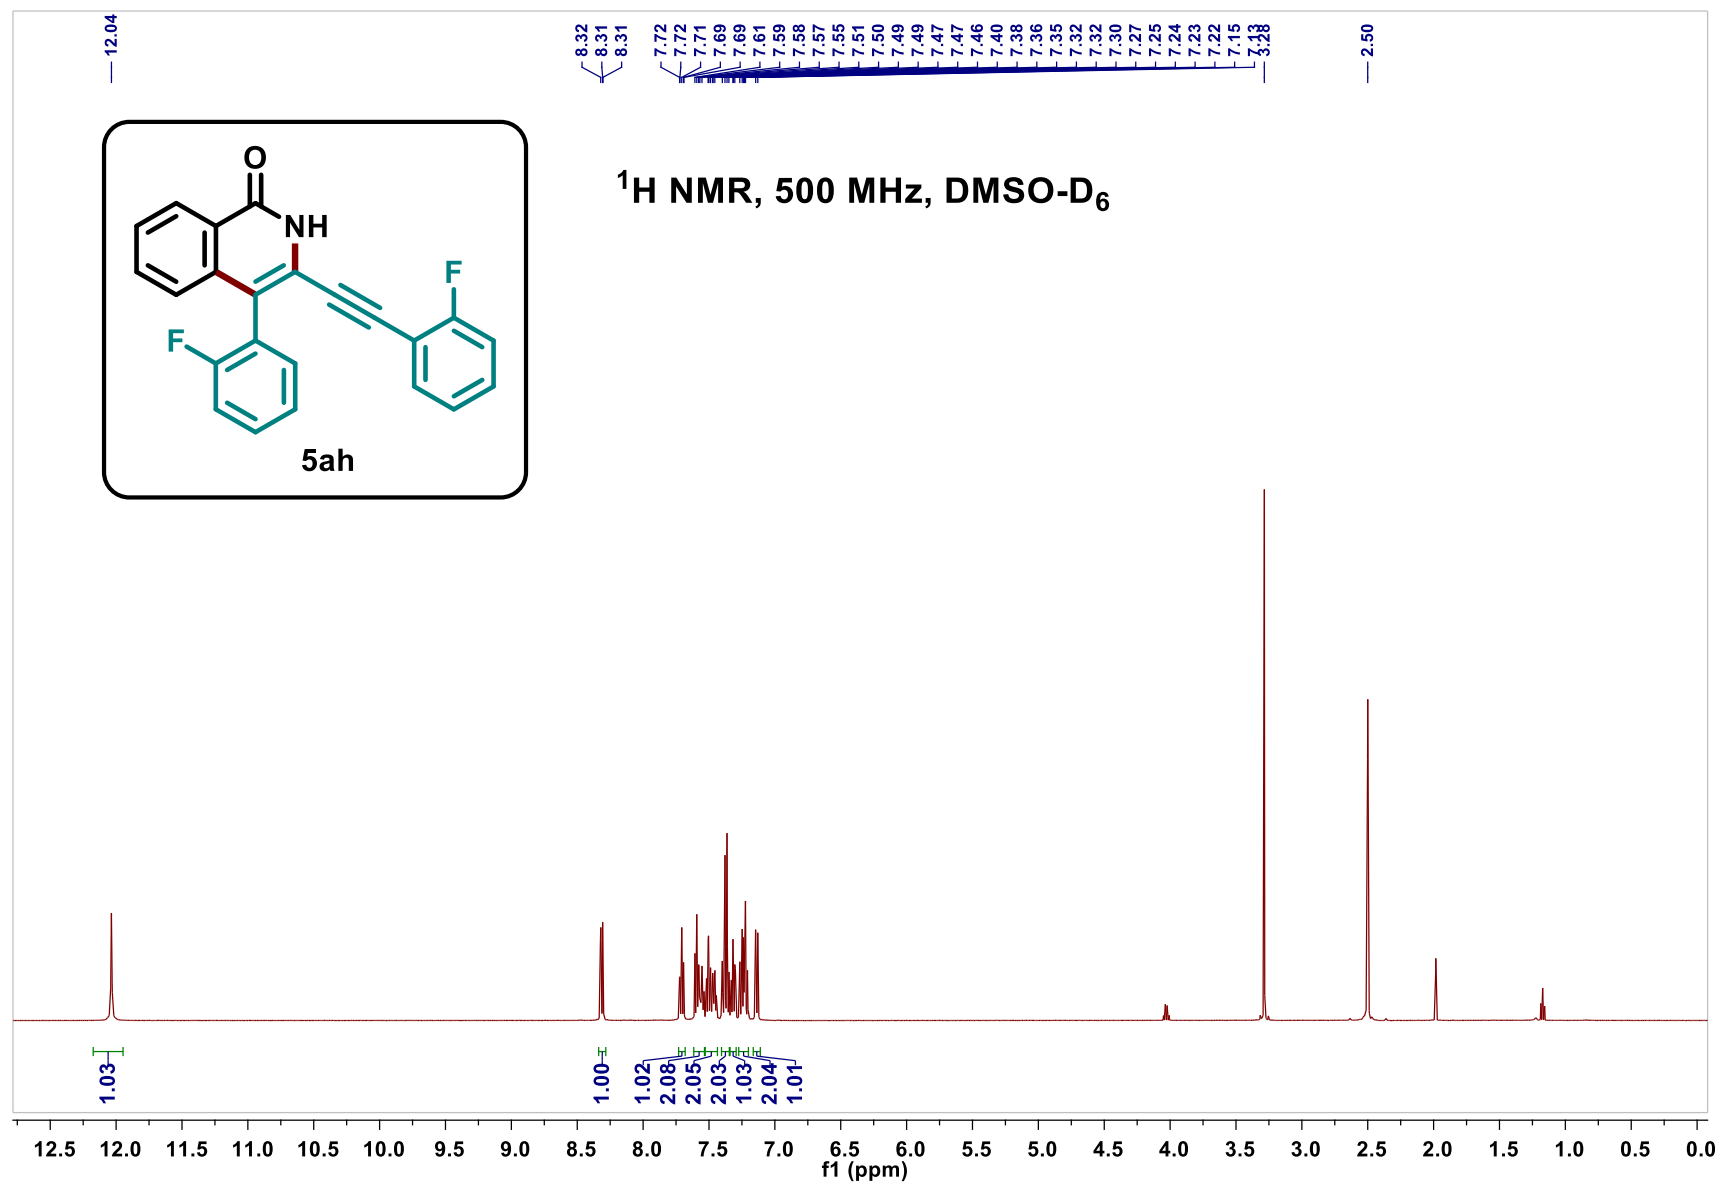

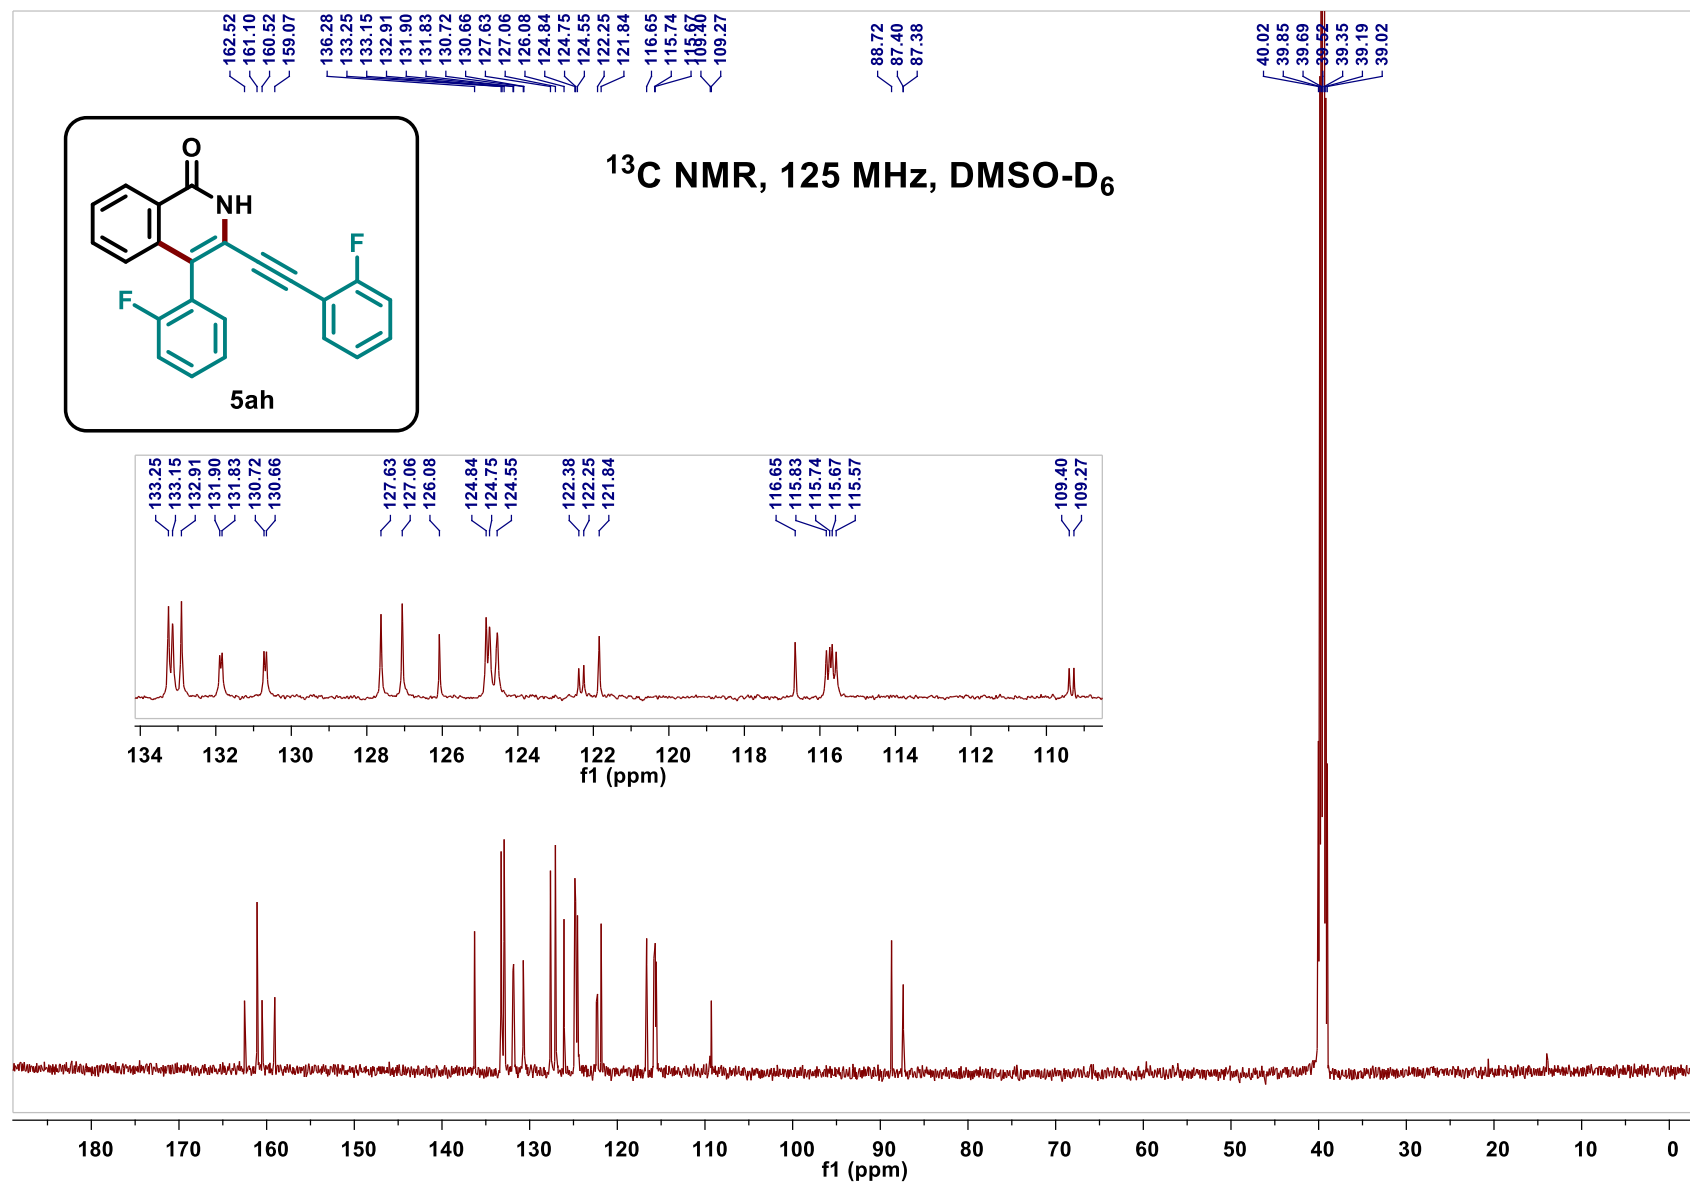



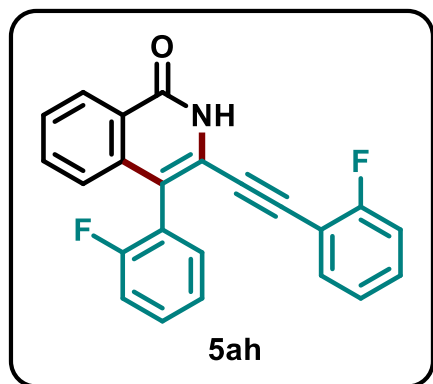

$^{19}\text{F}$  NMR, 470 MHz, DMSO- $\text{D}_6$

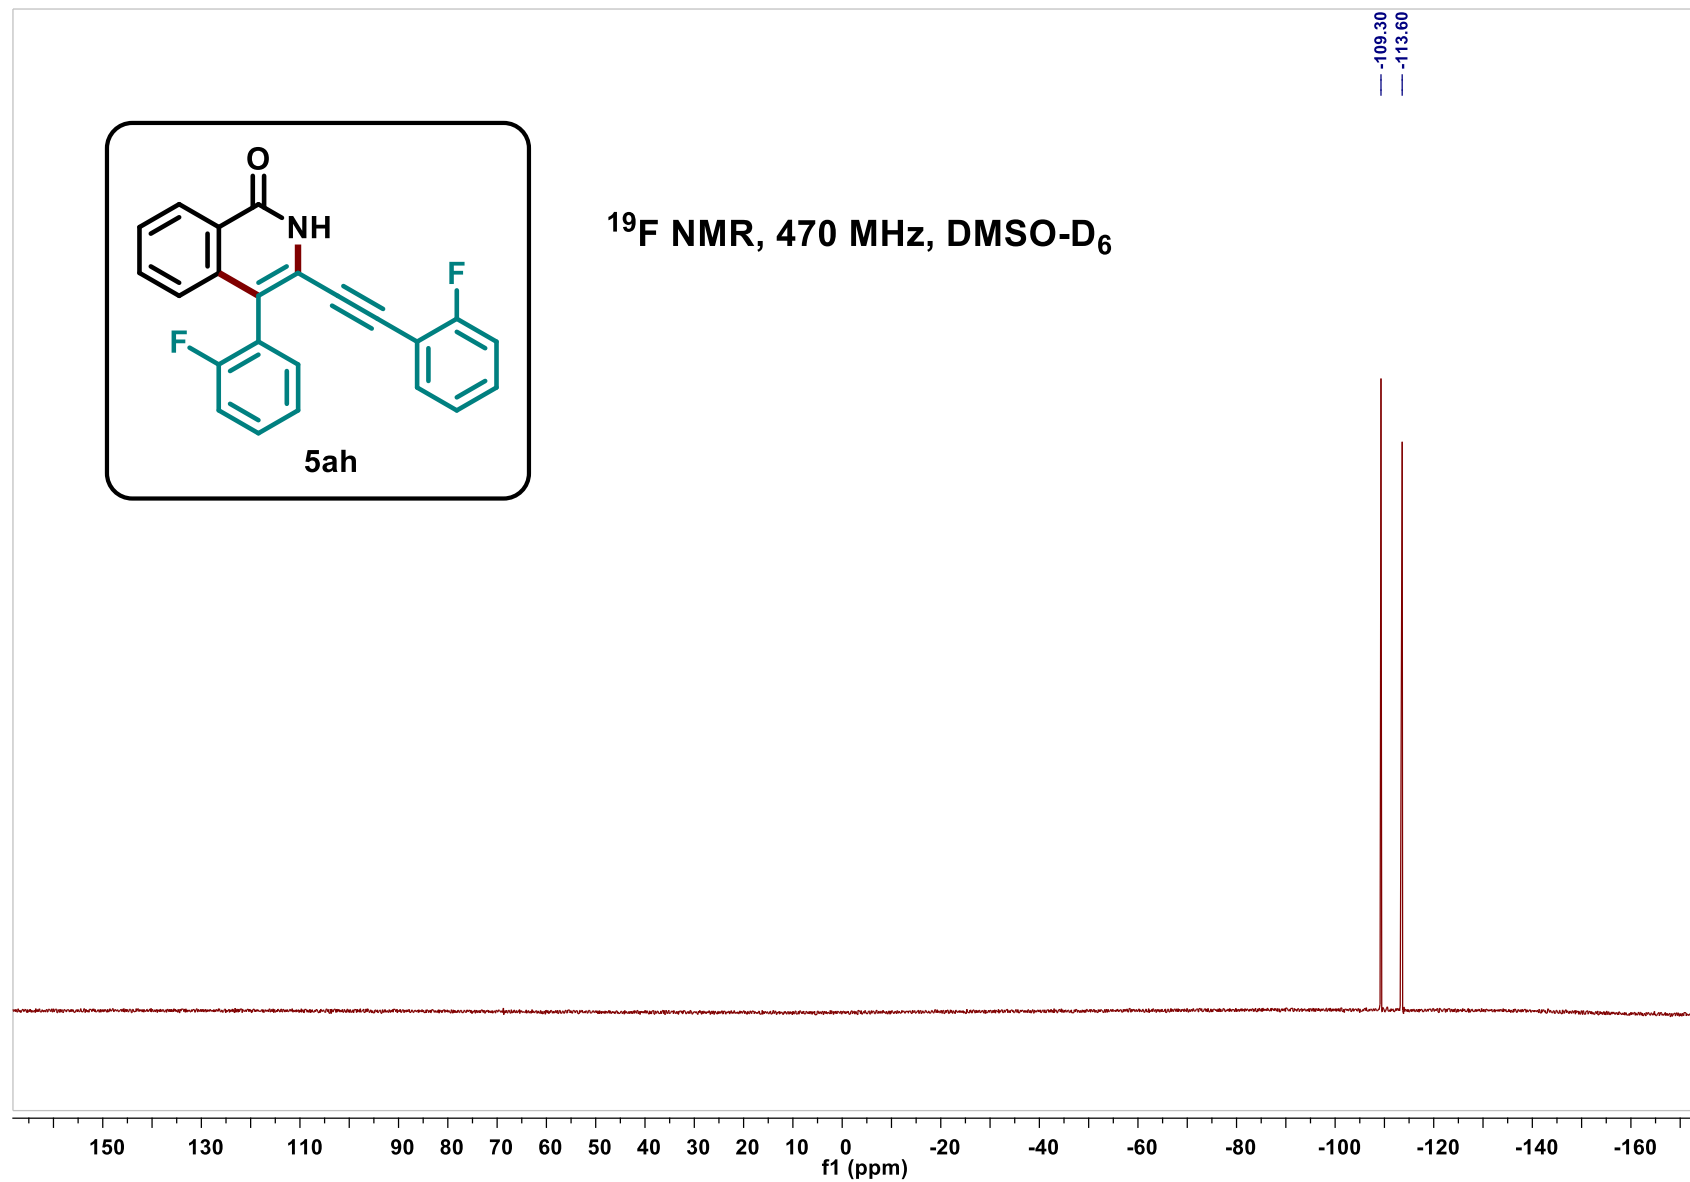

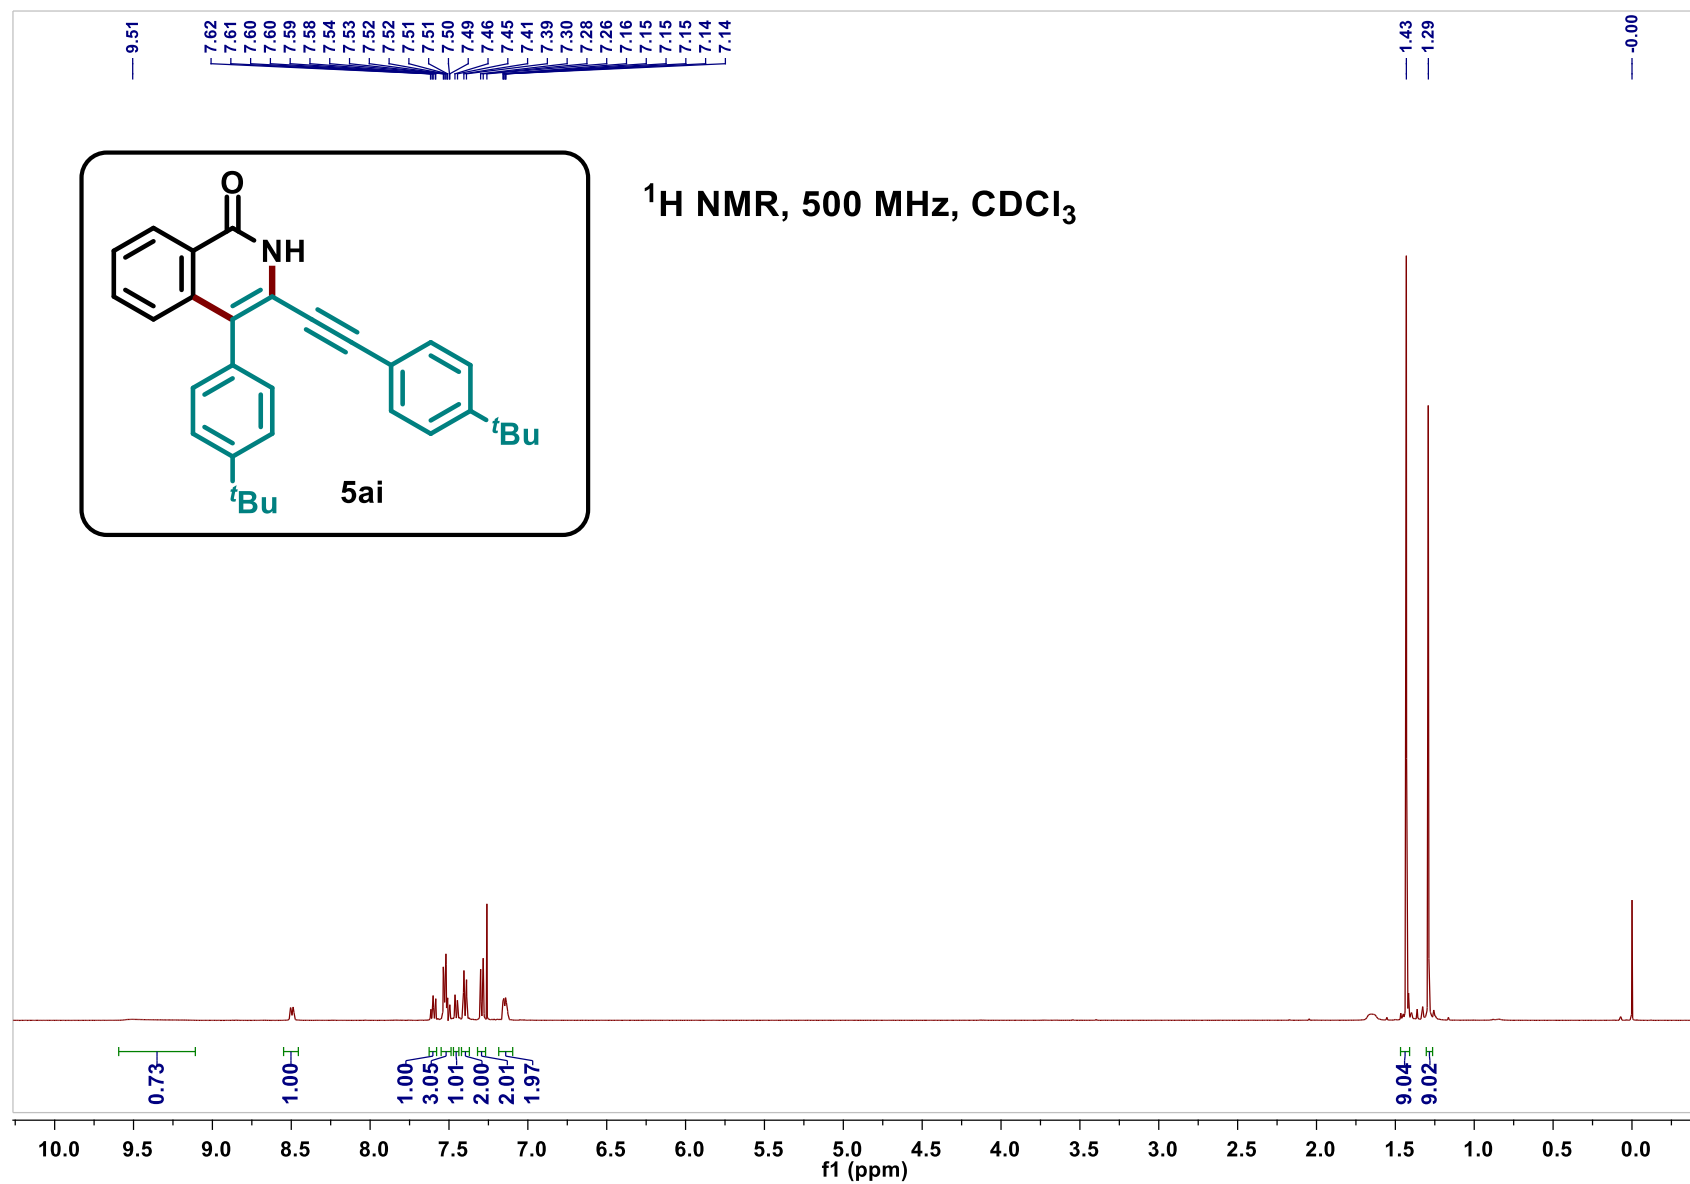

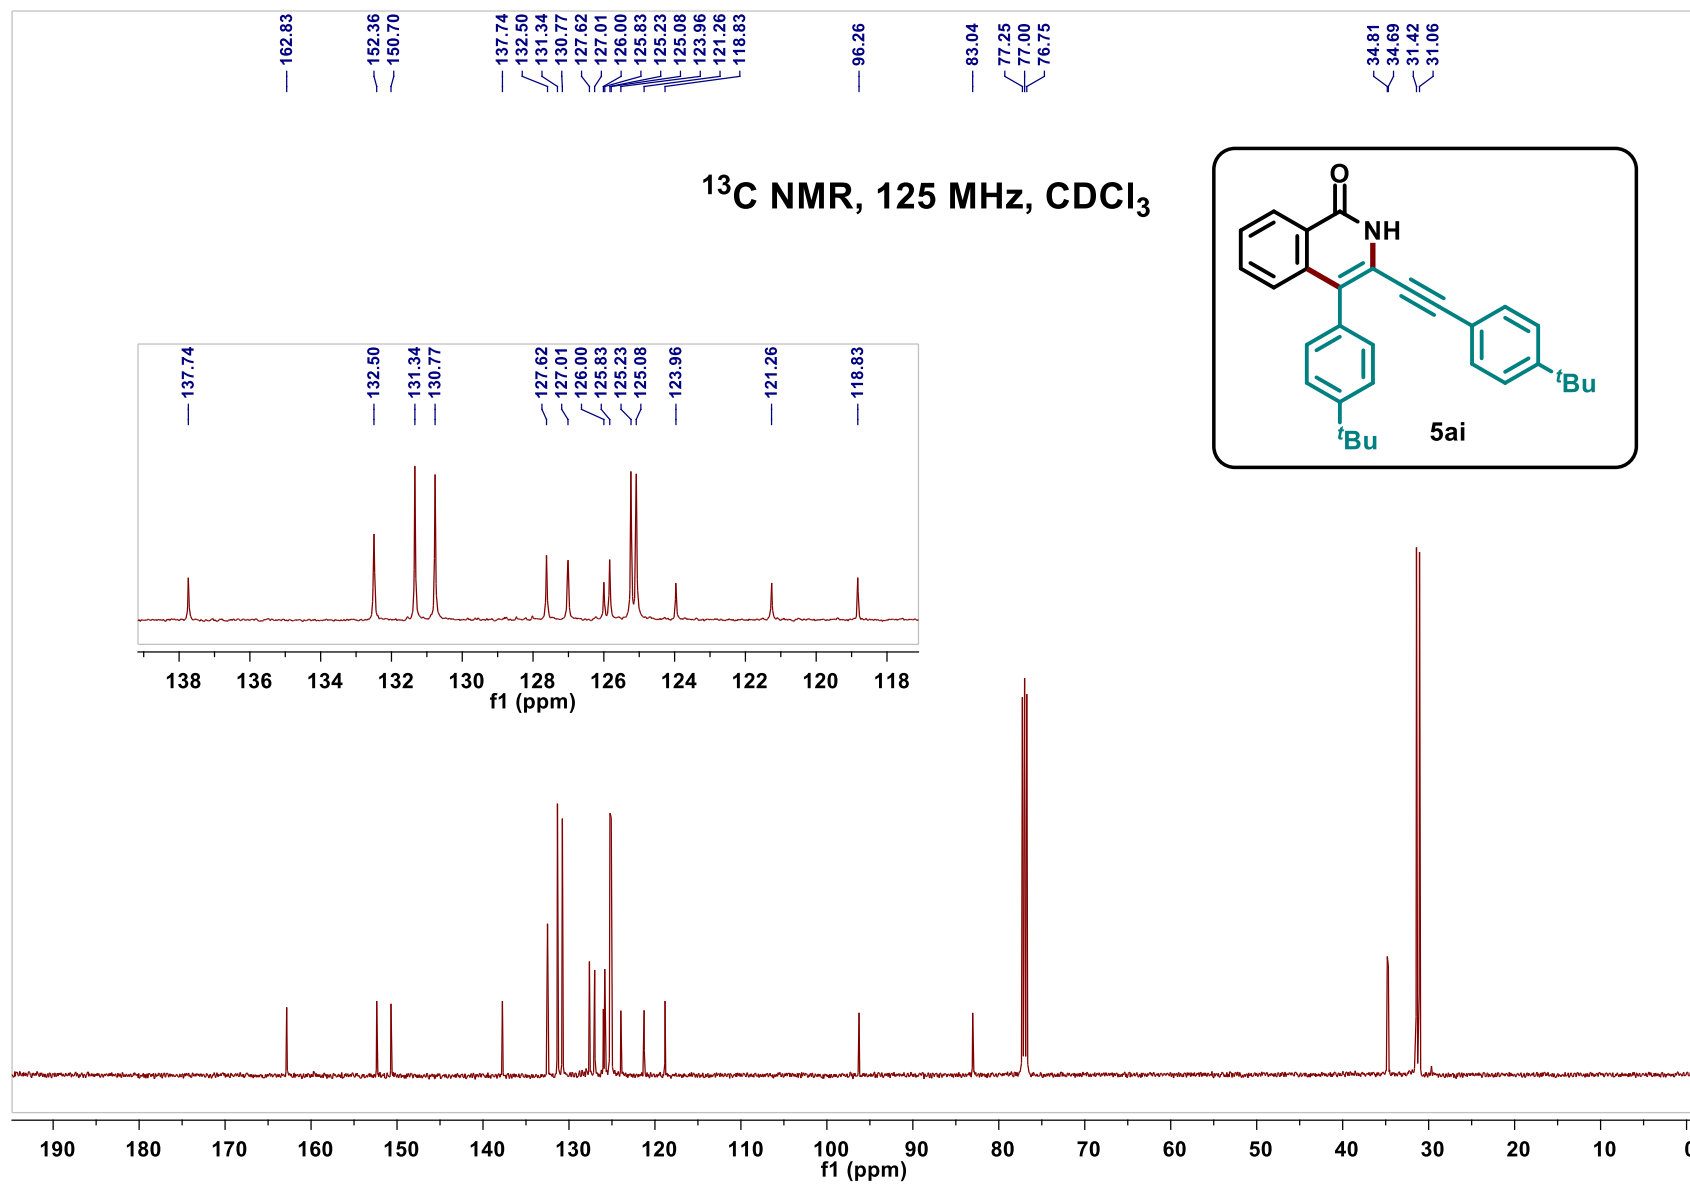

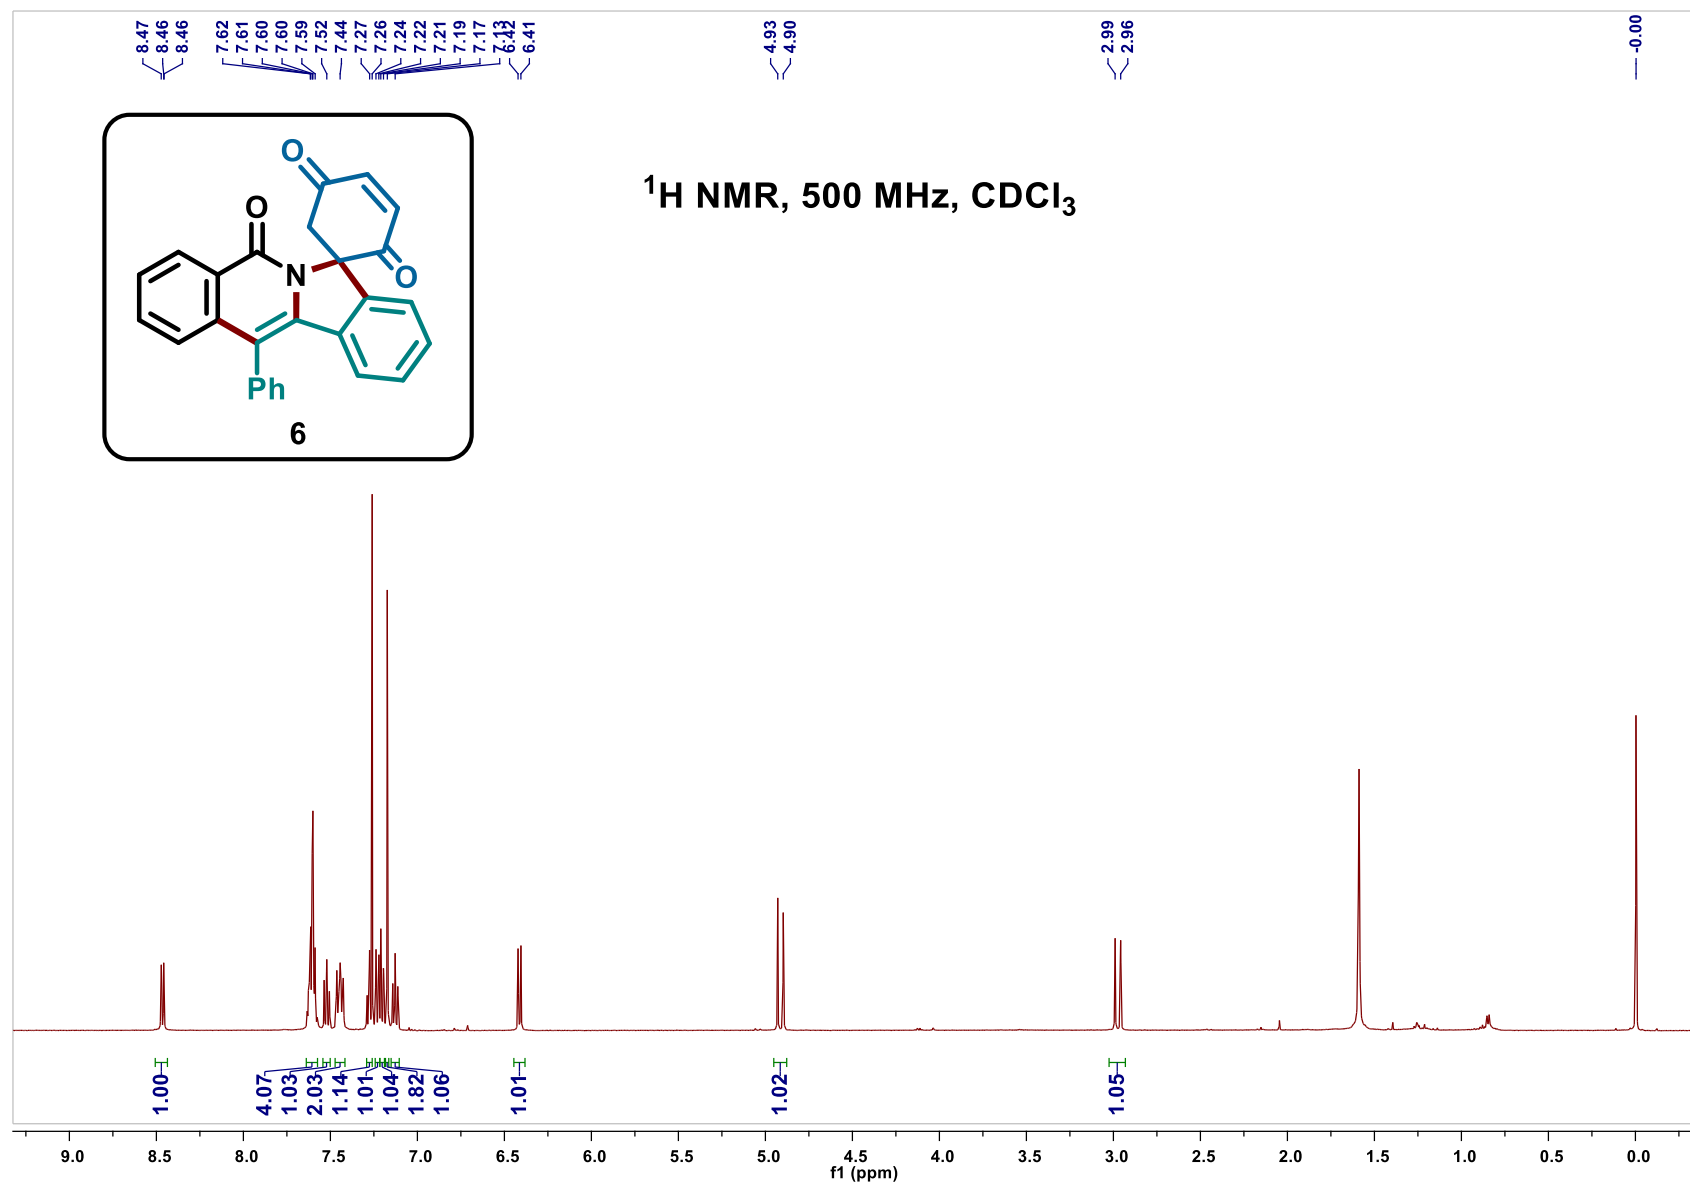

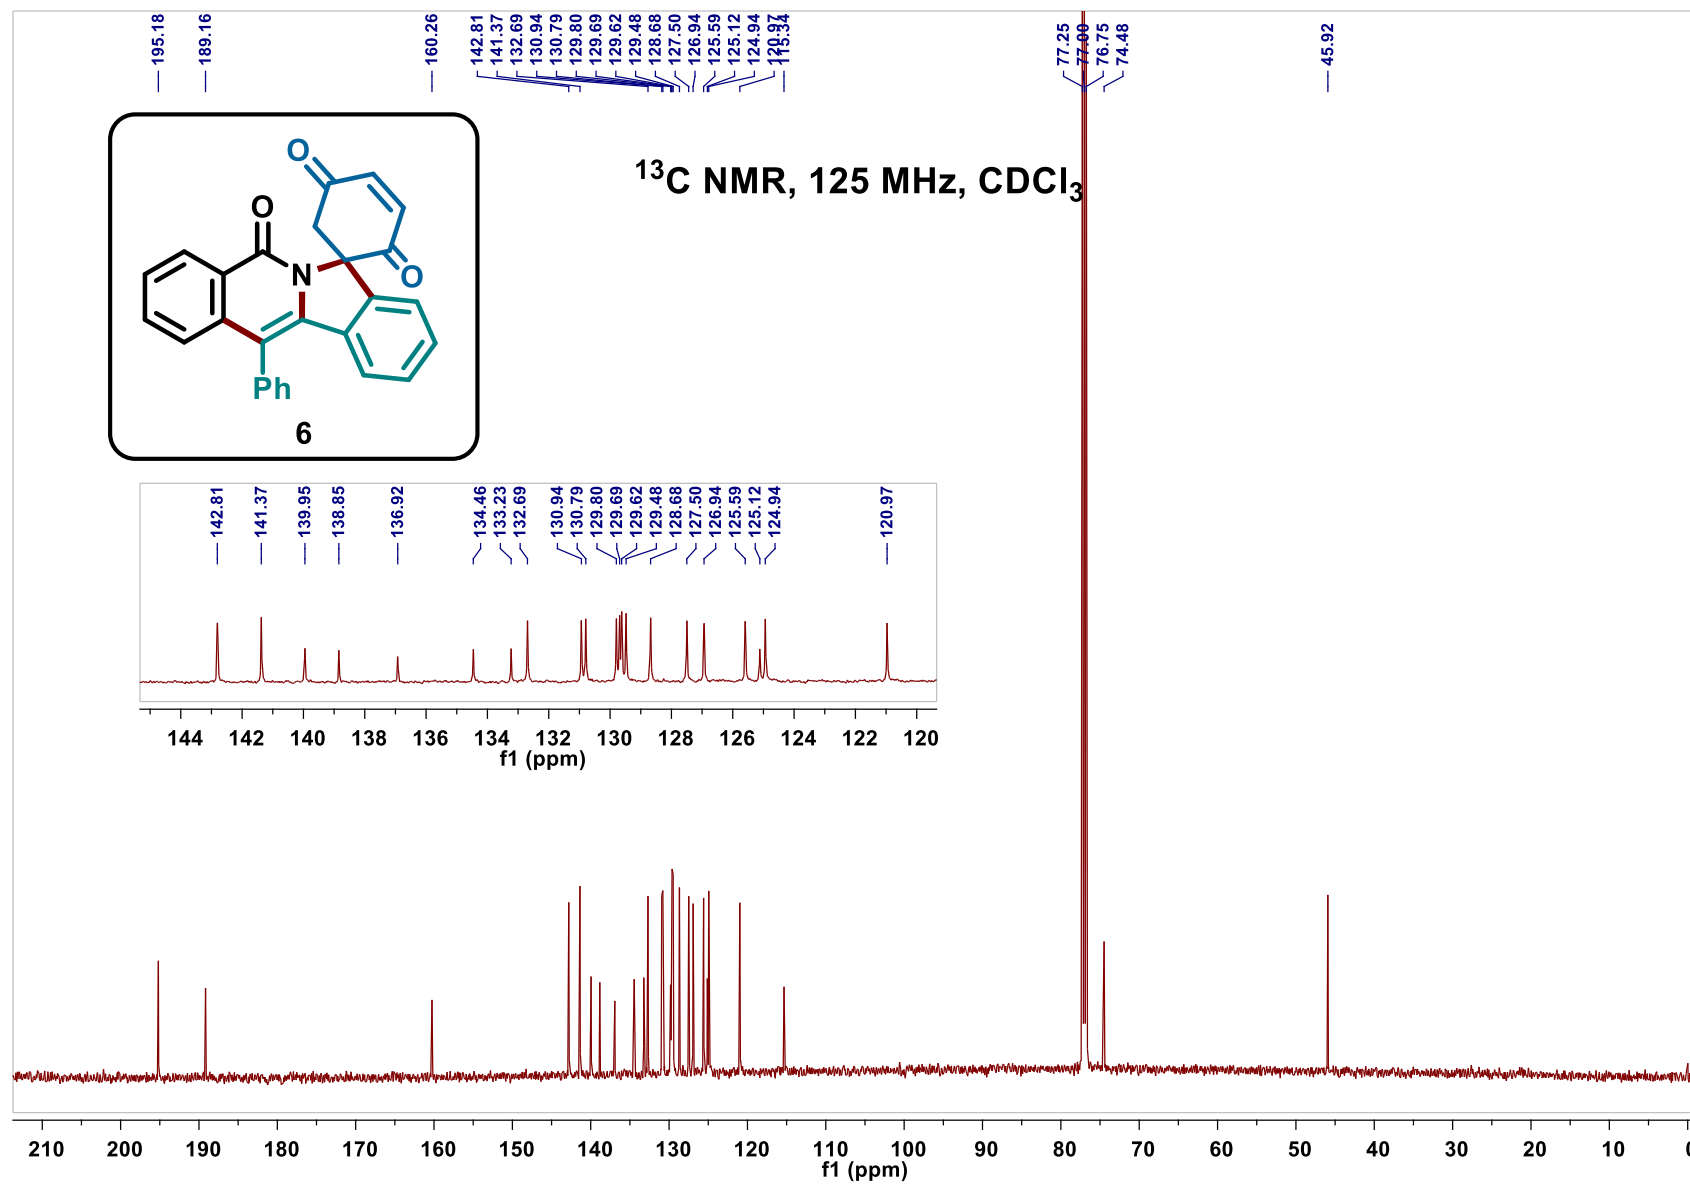

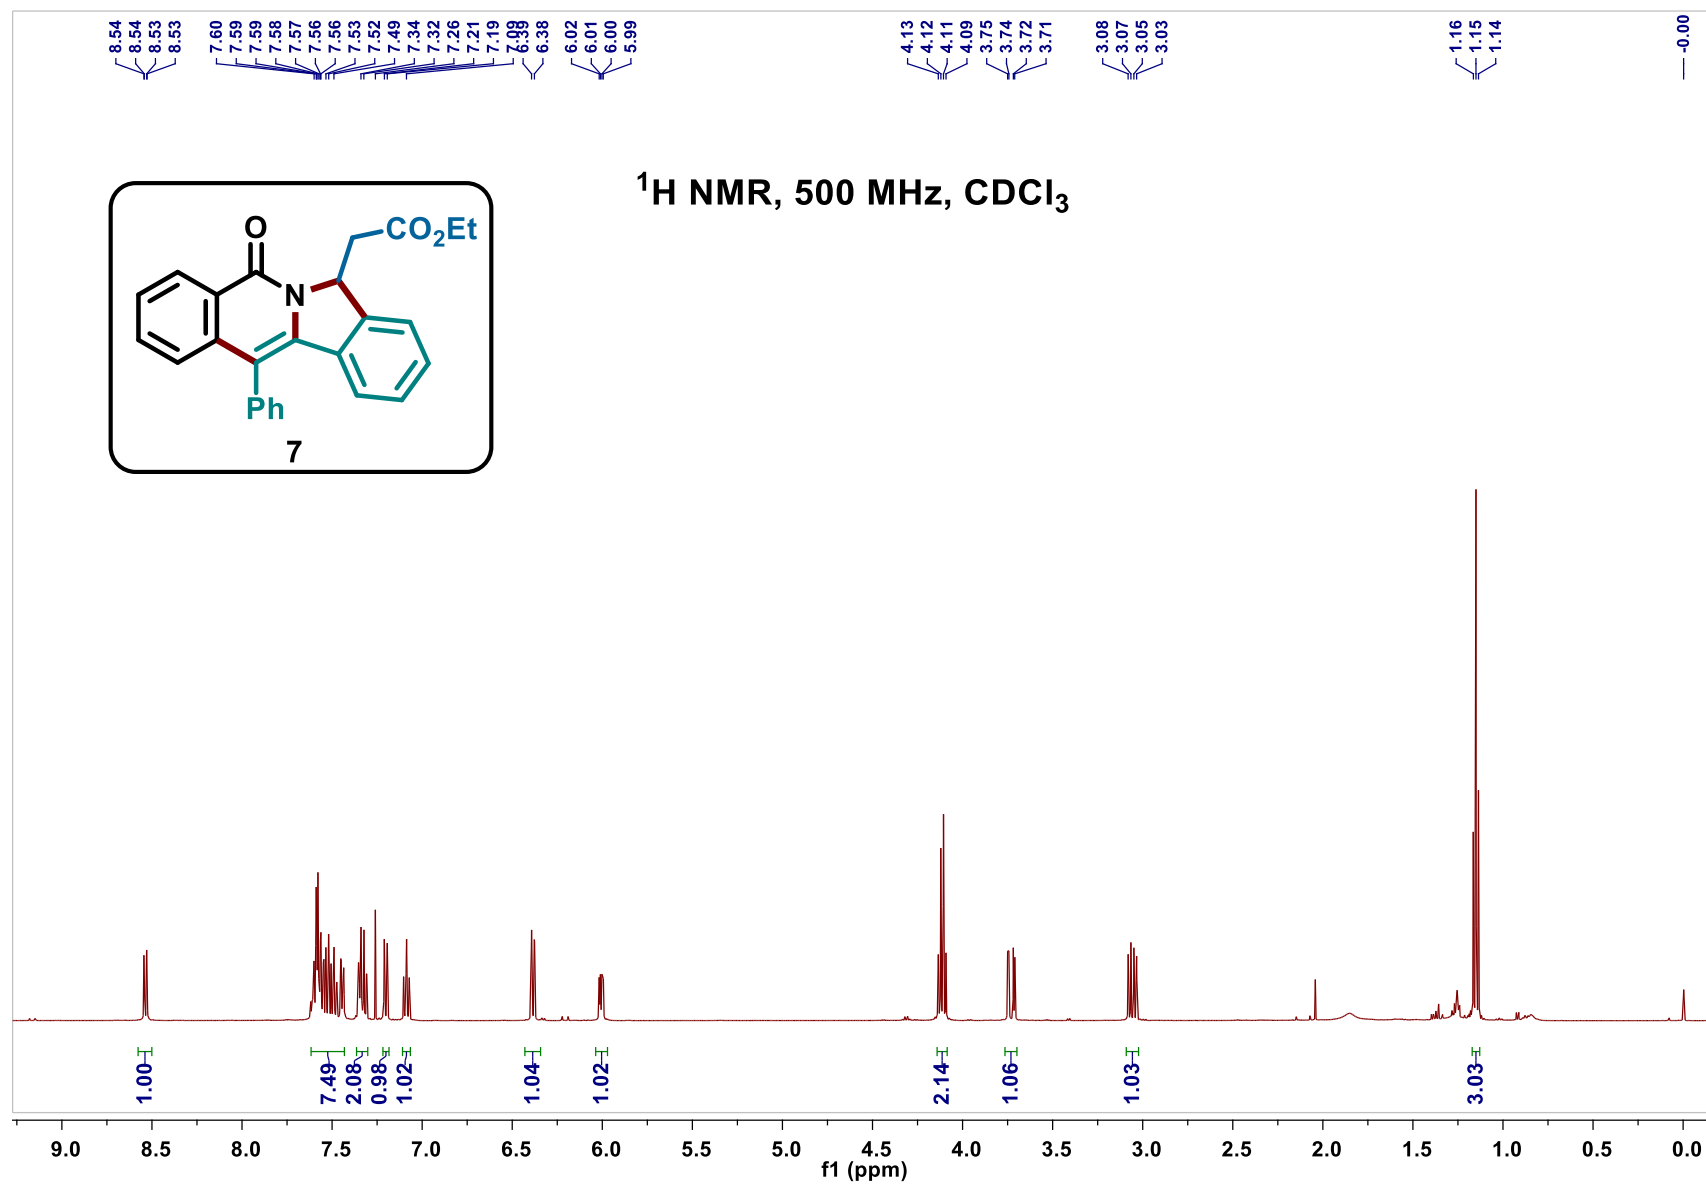

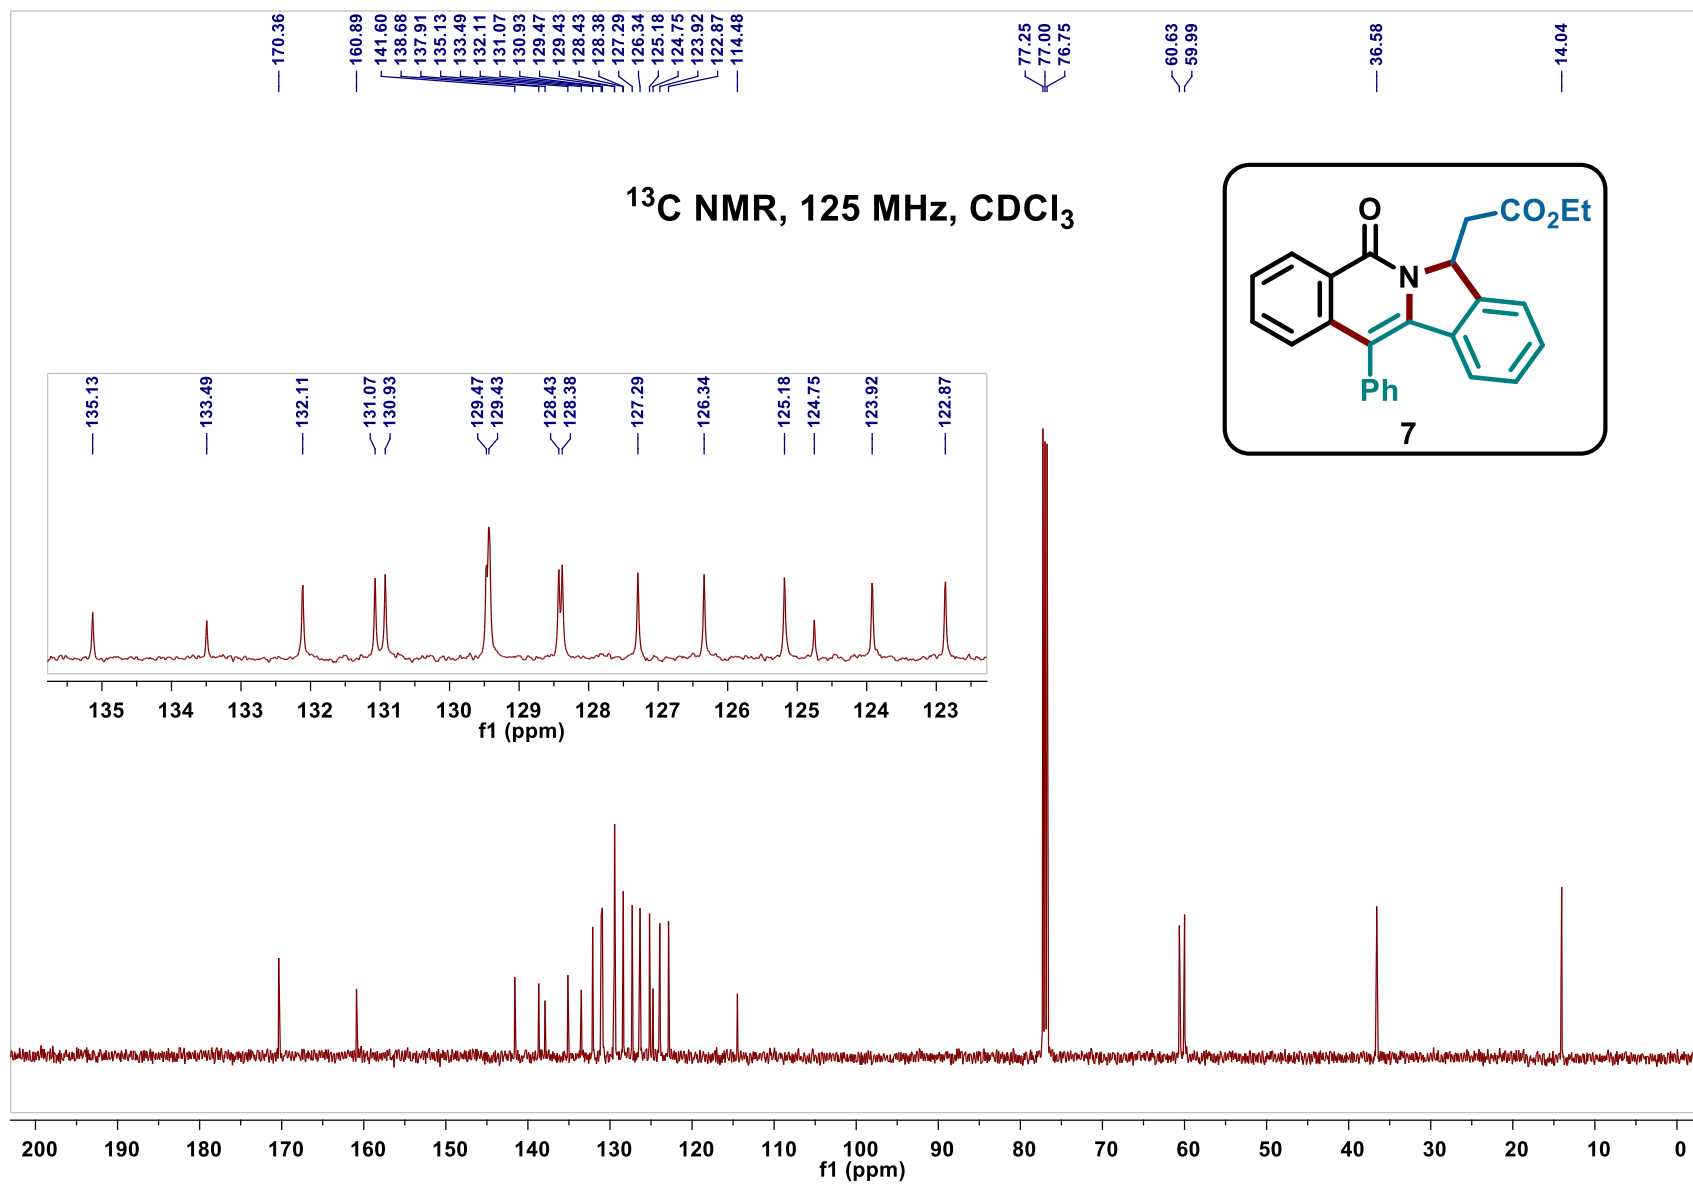

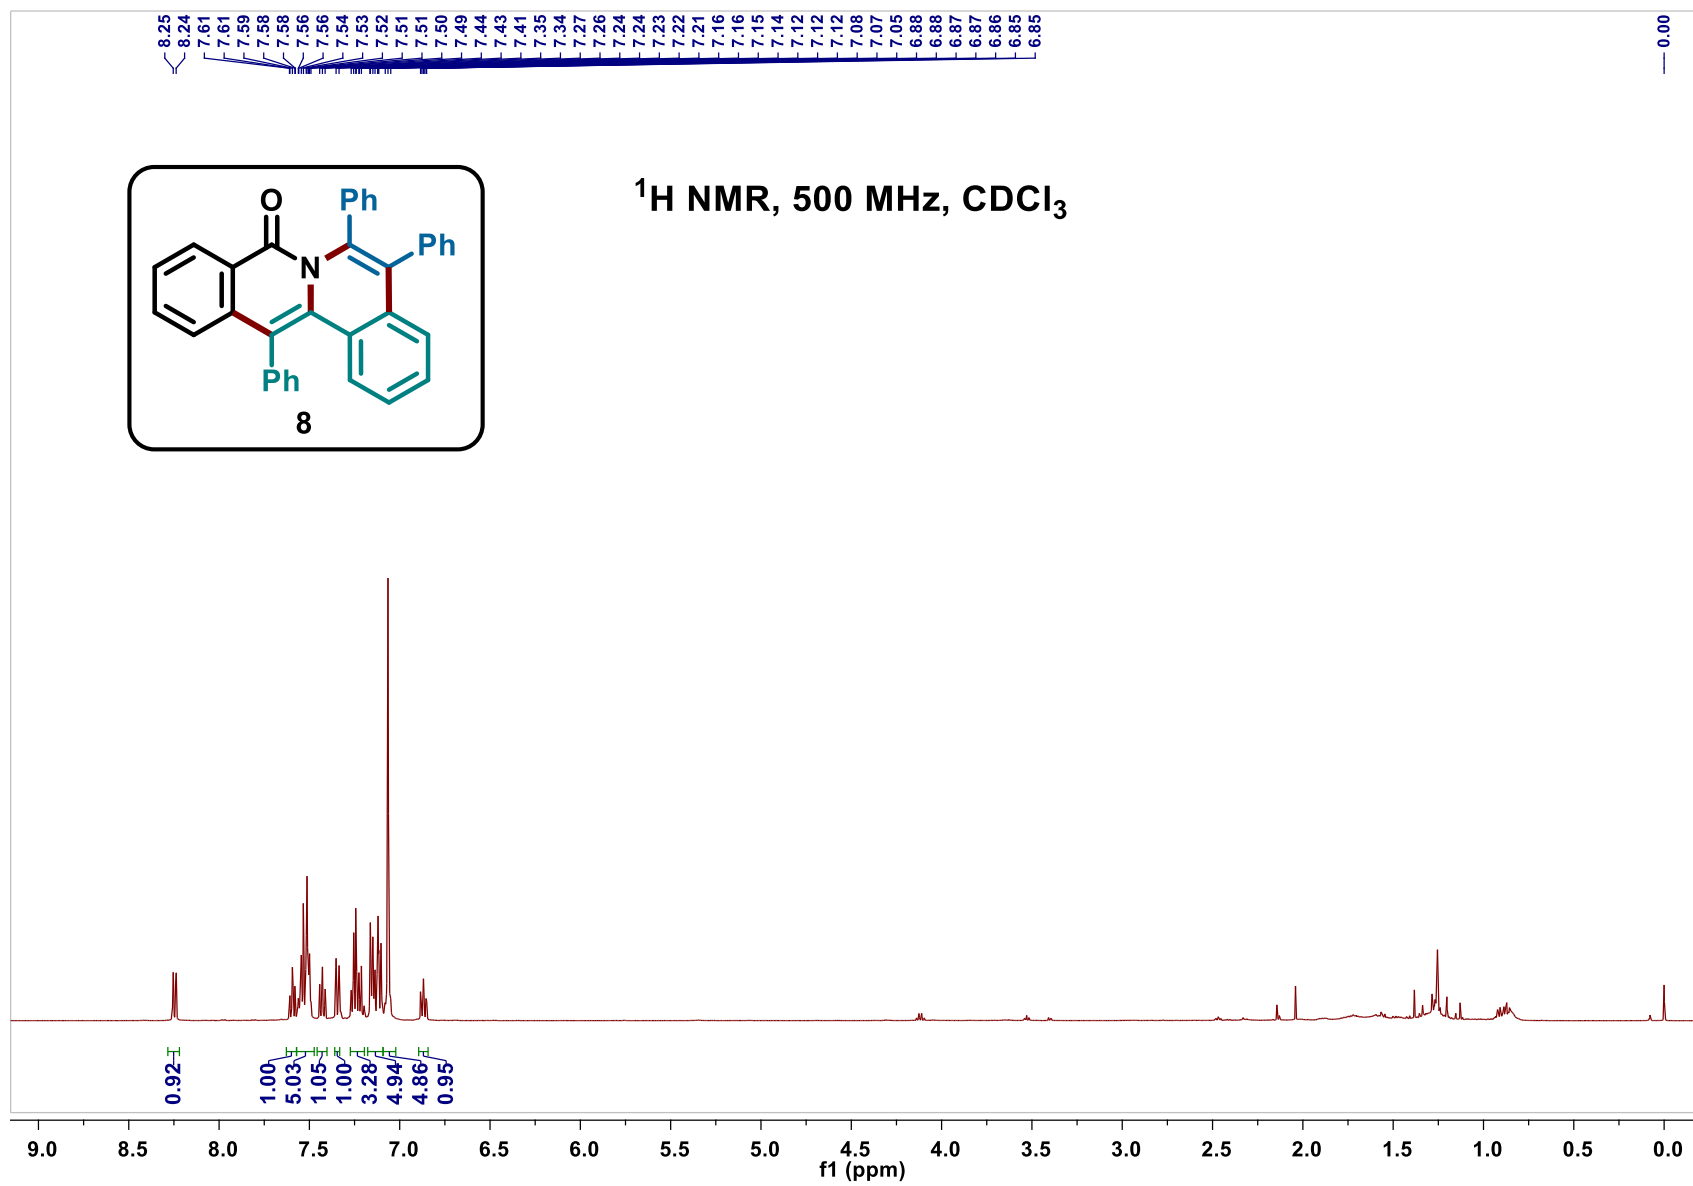



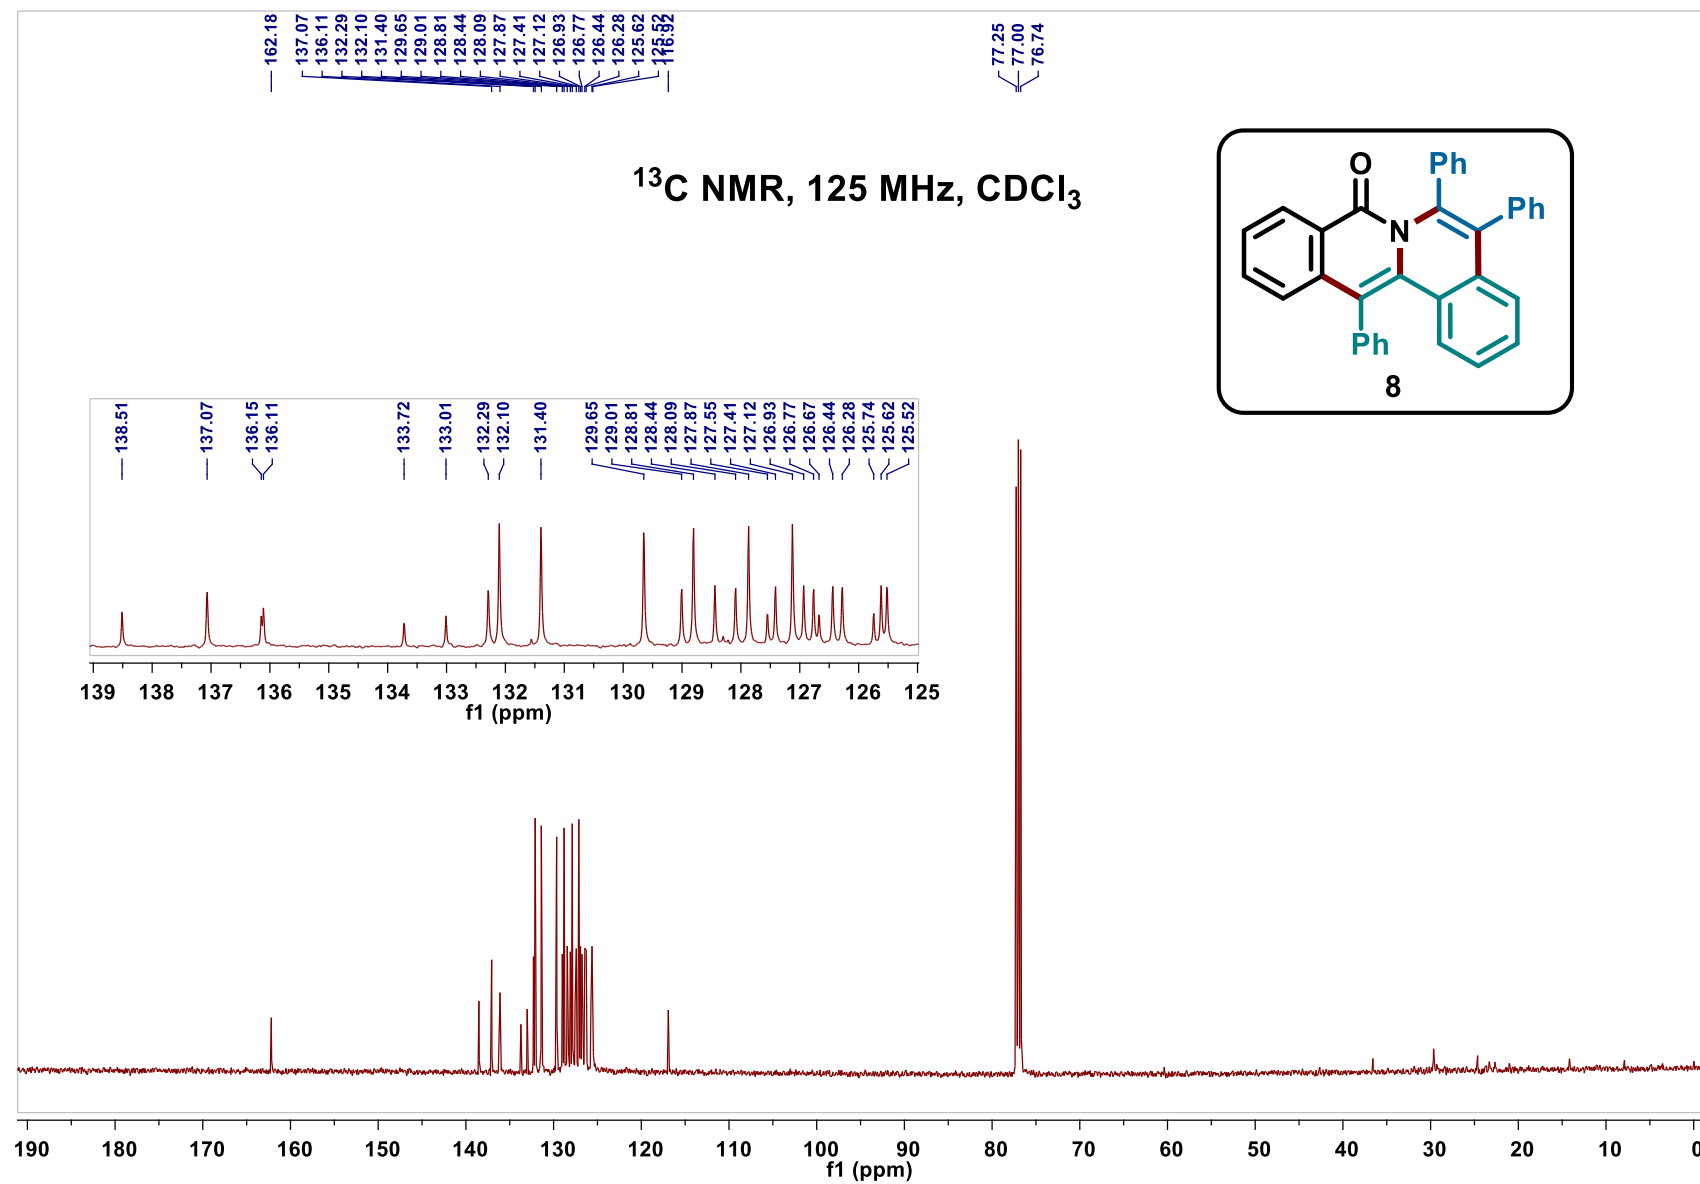

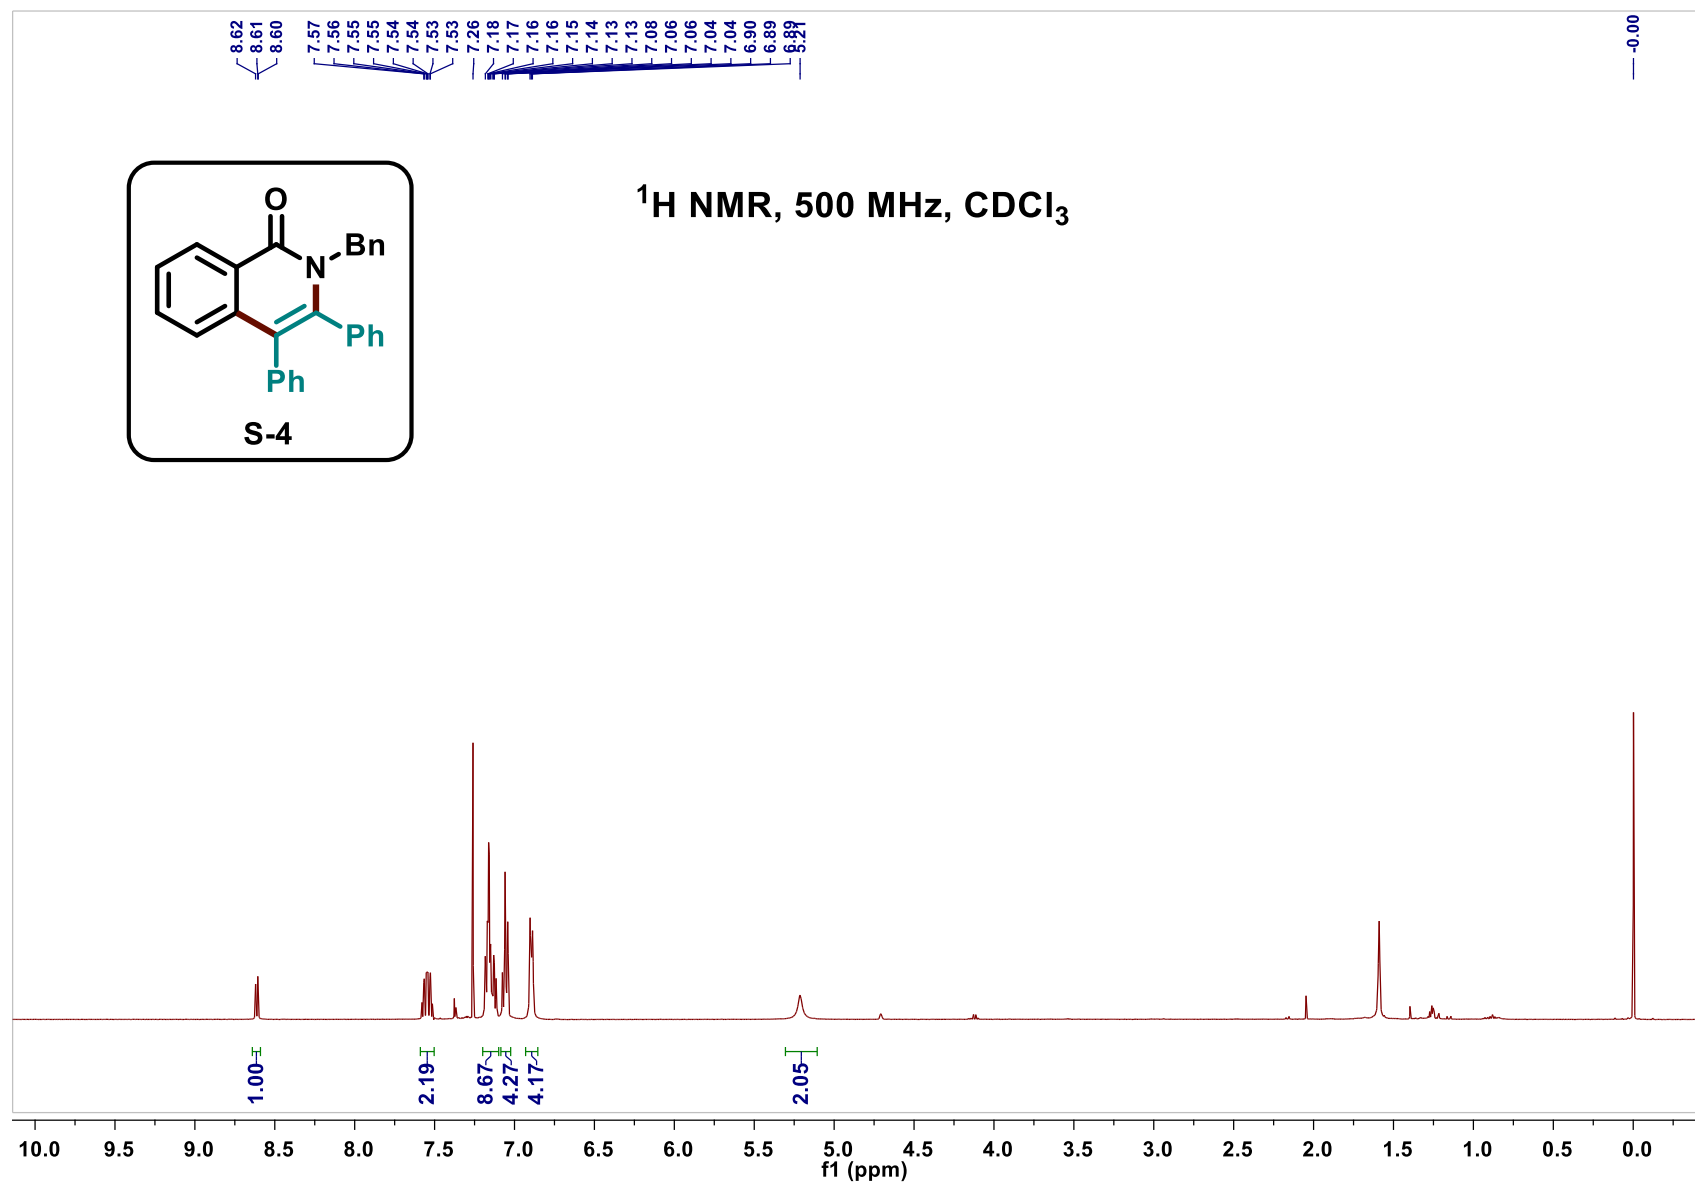

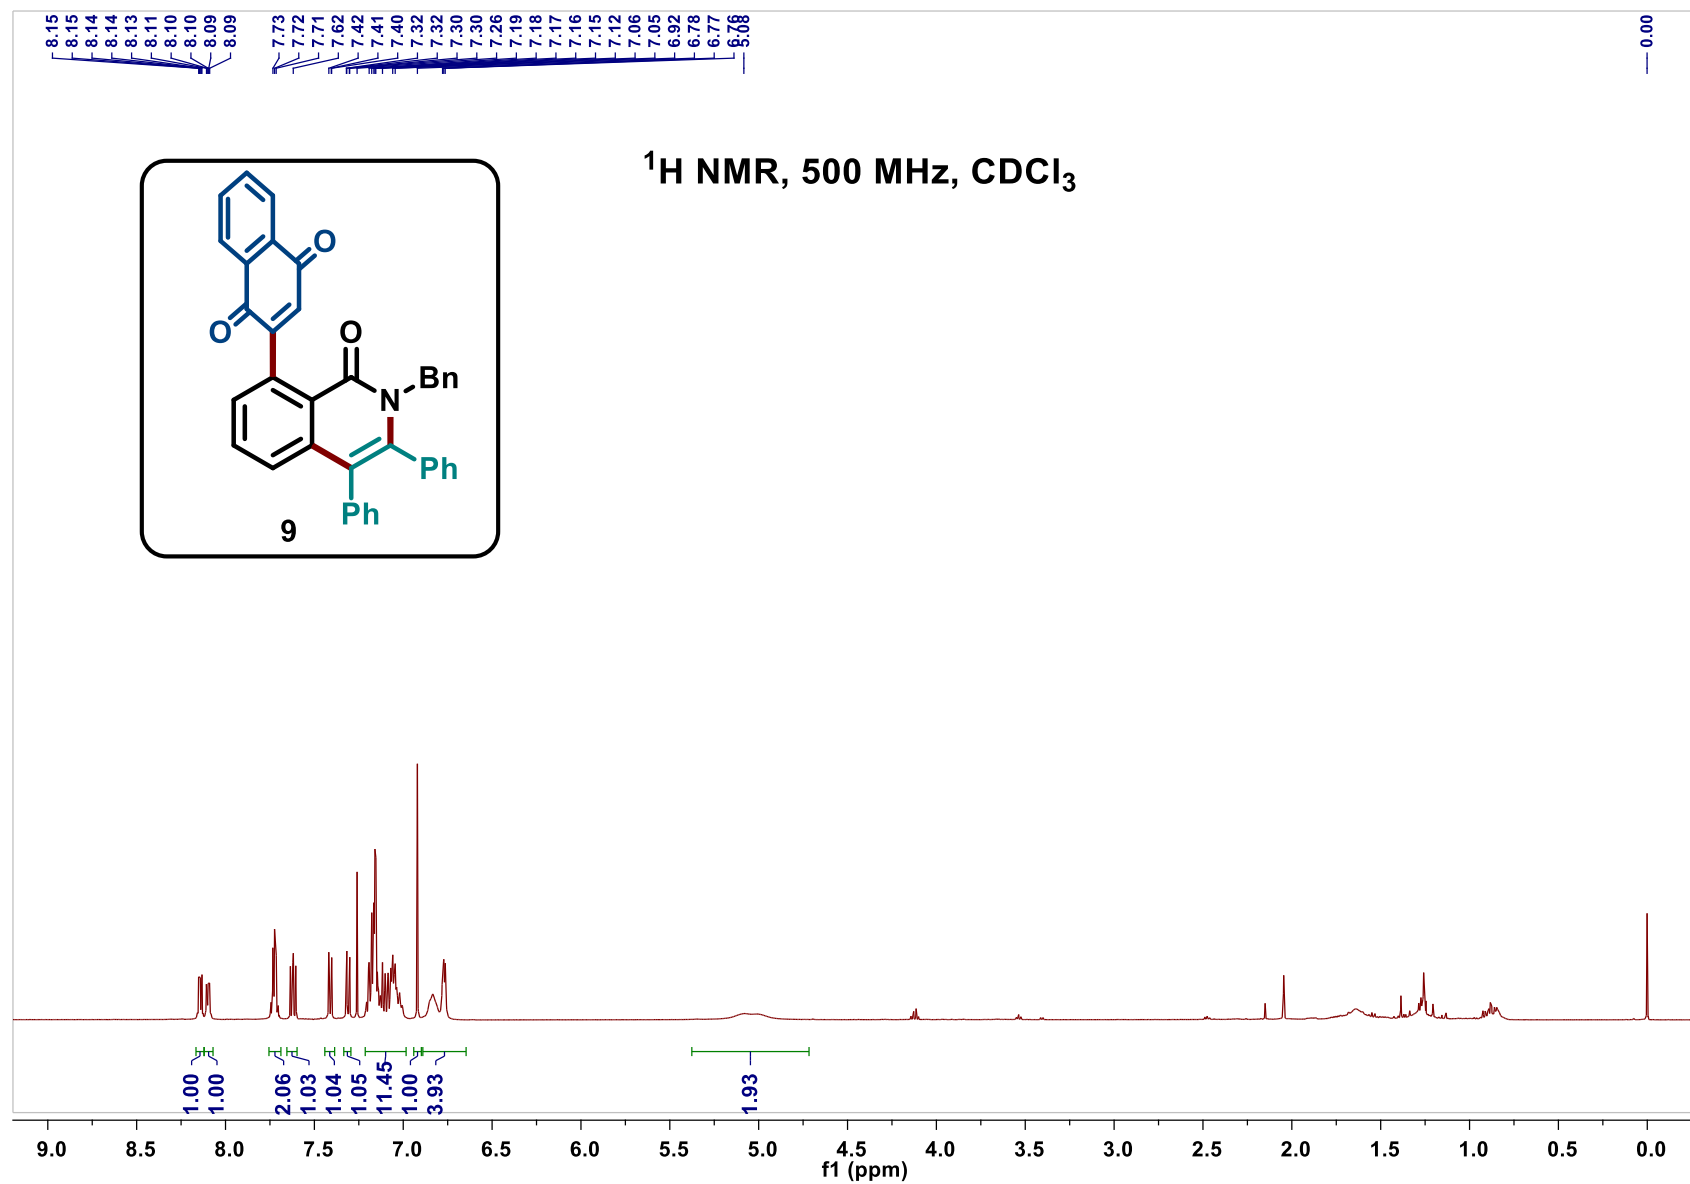

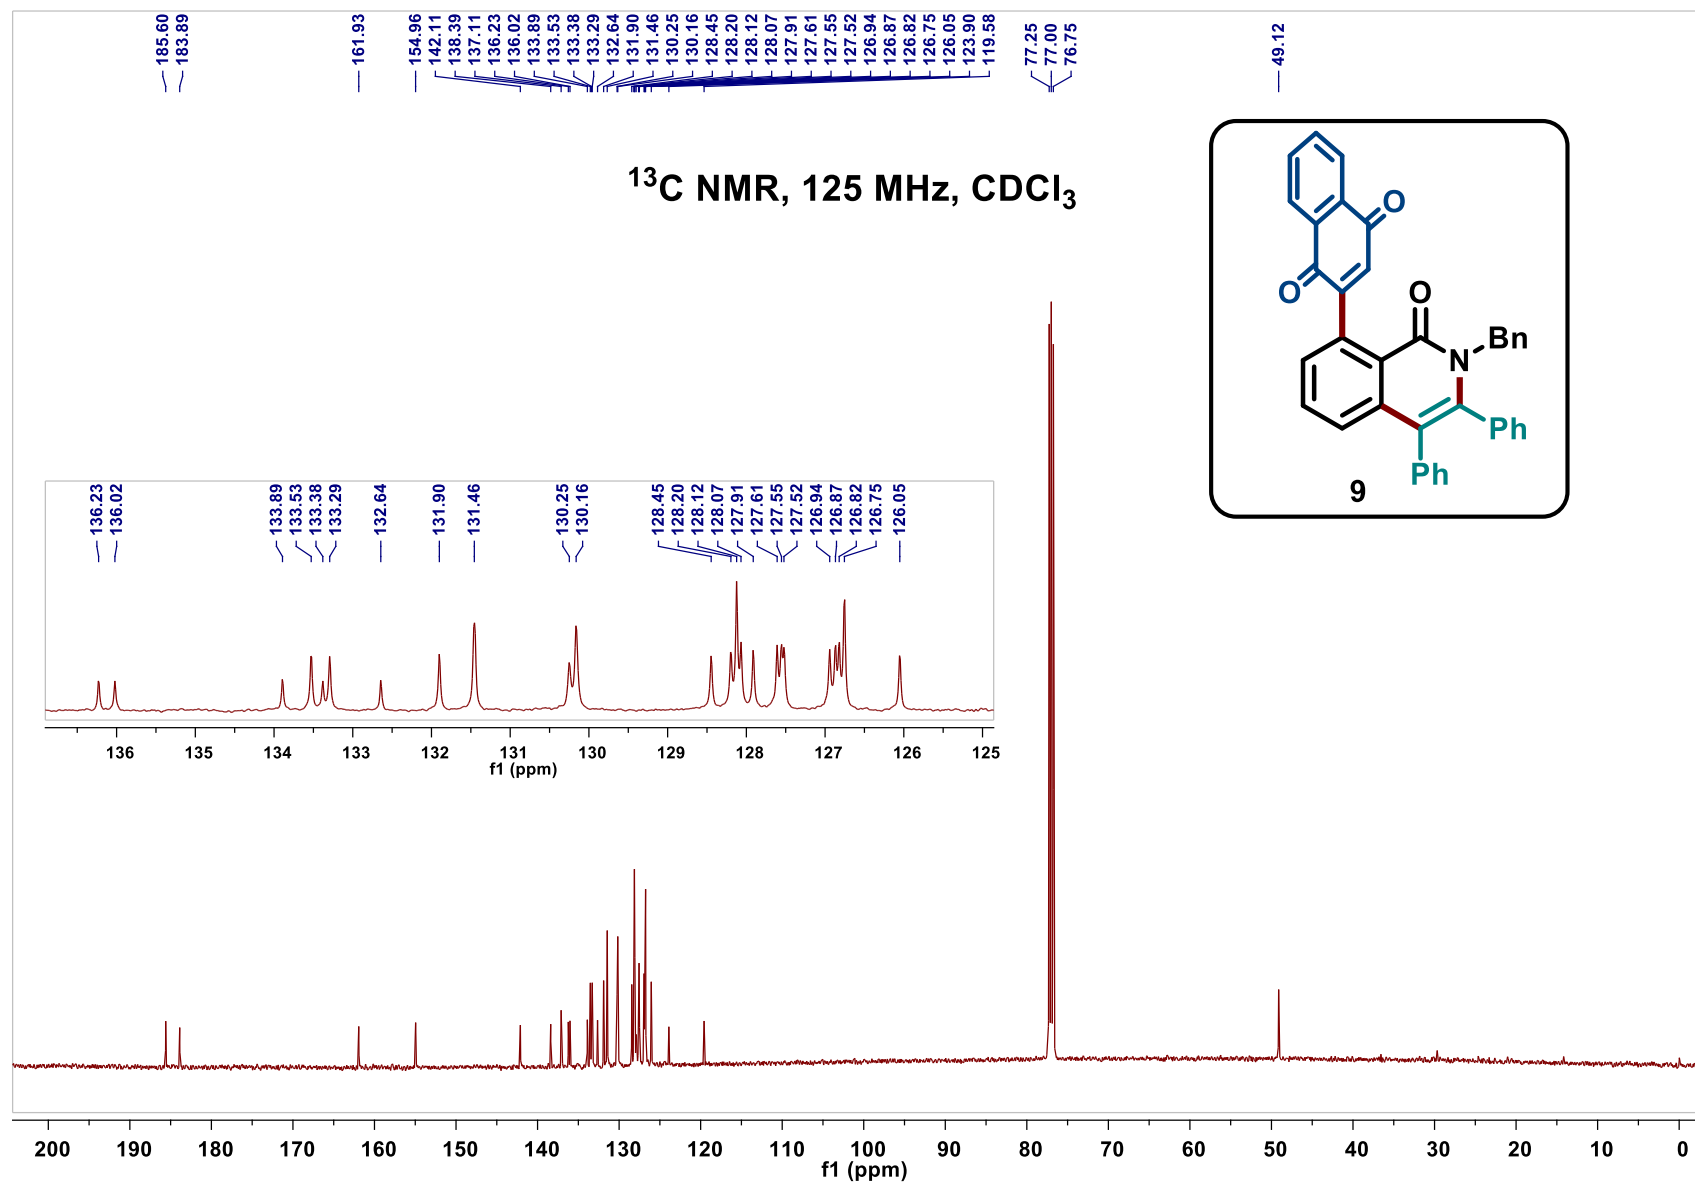

Supplement: d5cc01230a1.pdf [file d5cc01230a1.pdf]
